# Supplementary material for: Acute watery diarrhoea cases during cholera outbreak in Syria: a cohort study
Source: PubMed Central journal article supplement — BMJ Open. 2024 May 3;14(5):e082385. doi: 10.1136/bmjopen-2023-082385 (PMC11086290; doi:10.1136/bmjopen-2023-082385), 2024-05-03

# Supplementary File B Subgroup's analysis

## Symptoms and laboratory findings according to age Class

### (3) Vomiting

Yes (1)

No (0)

#### \* Age\_ Classification Crosstabulation

|                                   |   | Age_ Classification          |                    |                      |                       |                      |                       |                   | Total |        |
|-----------------------------------|---|------------------------------|--------------------|----------------------|-----------------------|----------------------|-----------------------|-------------------|-------|--------|
|                                   |   | Age_1 (<2 years)             | Age_1 (2 -5 years) | Age_3 (5 - 10 years) | Age_4 (10 - 18 years) | Age_5 (18 -30 years) | Age_6 (30 - 60 years) | Age_7 (>60 years) |       |        |
| (3) Vomiting<br>Yes (1)<br>No (0) | 0 | Count                        | 42                 | 18                   | 18                    | 33                   | 50                    | 93                | 26    | 280    |
|                                   |   | % within (3) Vomiting        | 15.0%              | 6.4%                 | 6.4%                  | 11.8%                | 17.9%                 | 33.2%             | 9.3%  | 100.0% |
|                                   |   | Yes (1)                      |                    |                      |                       |                      |                       |                   |       |        |
|                                   |   | No (0)                       |                    |                      |                       |                      |                       |                   |       |        |
|                                   |   | % within Age_ Classification | 20.4%              | 18.2%                | 20.9%                 | 23.6%                | 34.2%                 | 32.2%             | 27.4% | 26.4%  |
|                                   |   | % of Total                   | 4.0%               | 1.7%                 | 1.7%                  | 3.1%                 | 4.7%                  | 8.8%              | 2.5%  | 26.4%  |
| 1                                 |   | Count                        | 164                | 81                   | 68                    | 107                  | 96                    | 196               | 69    | 781    |
|                                   |   | % within (3) Vomiting        | 21.0%              | 10.4%                | 8.7%                  | 13.7%                | 12.3%                 | 25.1%             | 8.8%  | 100.0% |
|                                   |   | Yes (1)                      |                    |                      |                       |                      |                       |                   |       |        |
|                                   |   | No (0)                       |                    |                      |                       |                      |                       |                   |       |        |
|                                   |   | % within Age_ Classification | 79.6%              | 81.8%                | 79.1%                 | 76.4%                | 65.8%                 | 67.8%             | 72.6% | 73.6%  |
|                                   |   | % of Total                   | 15.5%              | 7.6%                 | 6.4%                  | 10.1%                | 9.0%                  | 18.5%             | 6.5%  | 73.6%  |
| Total                             |   | Count                        | 206                | 99                   | 86                    | 140                  | 146                   | 289               | 95    | 1061   |
|                                   |   | % within (3) Vomiting        | 19.4%              | 9.3%                 | 8.1%                  | 13.2%                | 13.8%                 | 27.2%             | 9.0%  | 100.0% |
|                                   |   | Yes (1)<br>No (0)            |                    |                      |                       |                      |                       |                   |       |        |

|                              |        |        |        |        |        |        |        |        |
|------------------------------|--------|--------|--------|--------|--------|--------|--------|--------|
| % within Age_ Classification | 100.0% | 100.0% | 100.0% | 100.0% | 100.0% | 100.0% | 100.0% | 100.0% |
| % of Total                   | 19.4%  | 9.3%   | 8.1%   | 13.2%  | 13.8%  | 27.2%  | 9.0%   | 100.0% |

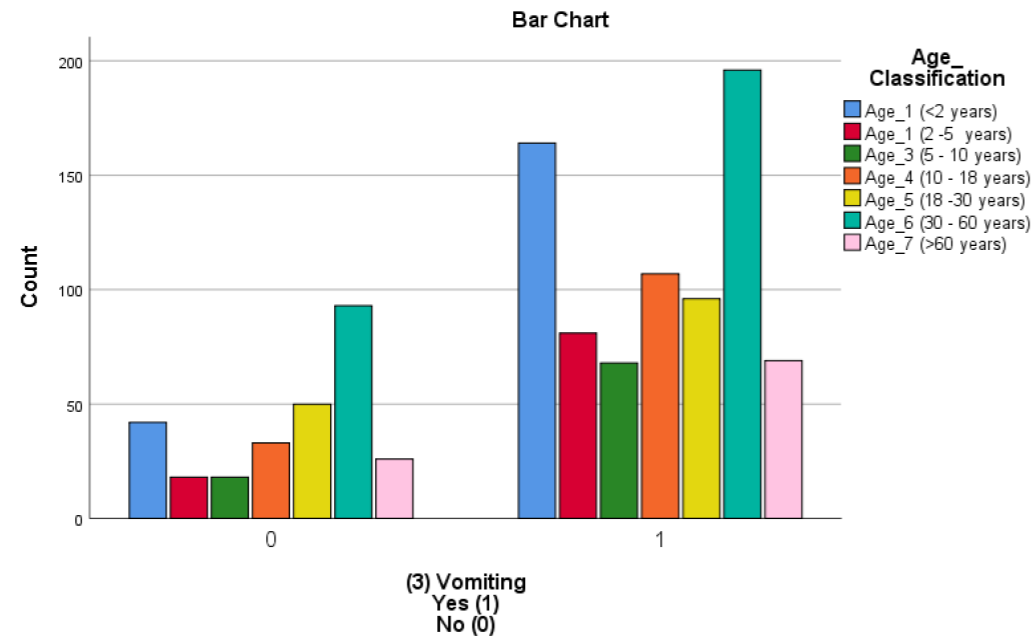

**(4) Abdominal cramps**  
**Yes (1)**  
**No (0) \* Age\_ Classification Crosstabulation**

|                      |                               | Age_ Classification           |                   |                    |                     |                     |                     |                   | Total  |        |
|----------------------|-------------------------------|-------------------------------|-------------------|--------------------|---------------------|---------------------|---------------------|-------------------|--------|--------|
|                      |                               | Age_1 (<2 years)              | Age_1 (2-5 years) | Age_3 (5-10 years) | Age_4 (10-18 years) | Age_5 (18-30 years) | Age_6 (30-60 years) | Age_7 (>60 years) |        |        |
| (4) Abdominal cramps | 0                             | Count                         | 159               | 56                 | 35                  | 60                  | 48                  | 89                | 38     | 485    |
|                      | Yes (1)                       | % within (4) Abdominal cramps | 32.8%             | 11.5%              | 7.2%                | 12.4%               | 9.9%                | 18.4%             | 7.8%   | 100.0% |
|                      |                               | No (0)                        |                   |                    |                     |                     |                     |                   |        |        |
|                      | No (0)                        | % within Age_ Classification  | 77.2%             | 56.6%              | 40.7%               | 42.9%               | 32.9%               | 30.8%             | 40.0%  | 45.7%  |
|                      |                               | % of Total                    | 15.0%             | 5.3%               | 3.3%                | 5.7%                | 4.5%                | 8.4%              | 3.6%   | 45.7%  |
|                      | 1                             | Count                         | 47                | 43                 | 51                  | 80                  | 98                  | 200               | 57     | 576    |
| Yes (1)              | % within (4) Abdominal cramps | 8.2%                          | 7.5%              | 8.9%               | 13.9%               | 17.0%               | 34.7%               | 9.9%              | 100.0% |        |
|                      | No (0)                        |                               |                   |                    |                     |                     |                     |                   |        |        |

|       |                               |        |        |        |        |        |        |        |        |
|-------|-------------------------------|--------|--------|--------|--------|--------|--------|--------|--------|
|       | % within Age_ Classification  | 22.8%  | 43.4%  | 59.3%  | 57.1%  | 67.1%  | 69.2%  | 60.0%  | 54.3%  |
|       | % of Total                    | 4.4%   | 4.1%   | 4.8%   | 7.5%   | 9.2%   | 18.9%  | 5.4%   | 54.3%  |
| Total | Count                         | 206    | 99     | 86     | 140    | 146    | 289    | 95     | 1061   |
|       | % within (4) Abdominal cramps | 19.4%  | 9.3%   | 8.1%   | 13.2%  | 13.8%  | 27.2%  | 9.0%   | 100.0% |
|       | Yes (1)                       |        |        |        |        |        |        |        |        |
|       | No (0)                        |        |        |        |        |        |        |        |        |
|       | % within Age_ Classification  | 100.0% | 100.0% | 100.0% | 100.0% | 100.0% | 100.0% | 100.0% | 100.0% |
|       | % of Total                    | 19.4%  | 9.3%   | 8.1%   | 13.2%  | 13.8%  | 27.2%  | 9.0%   | 100.0% |

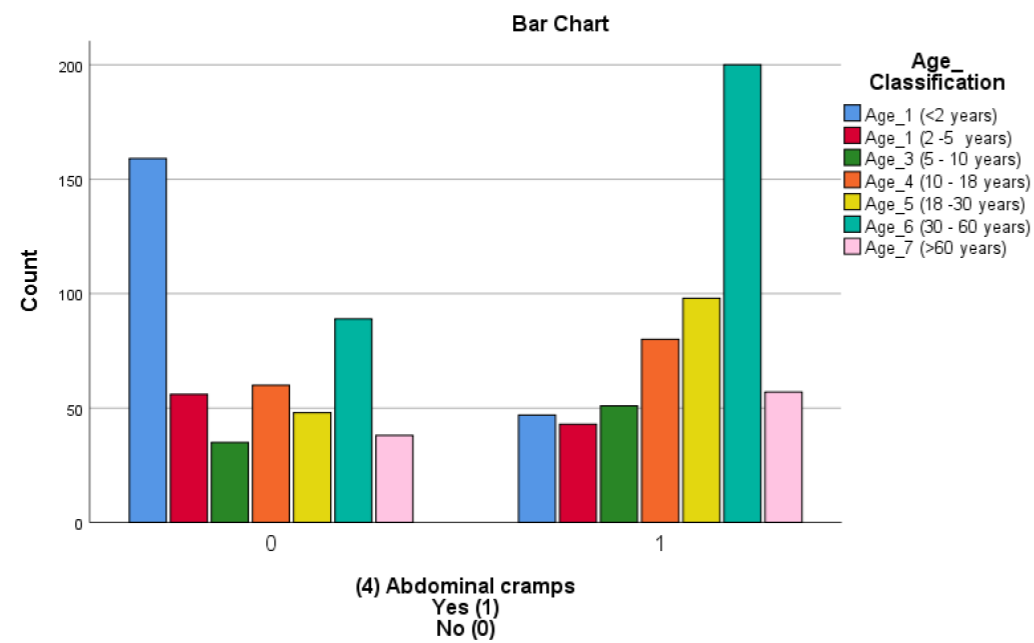

**(5) Fever**  
**Yes (1)**  
**No (0) \* Age\_ Classification Crosstabulation**

|           |   | Age_ Classification |                   |                    |                     |                     |                     |                   | Total |        |
|-----------|---|---------------------|-------------------|--------------------|---------------------|---------------------|---------------------|-------------------|-------|--------|
|           |   | Age_1 (<2 years)    | Age_1 (2-5 years) | Age_3 (5-10 years) | Age_4 (10-18 years) | Age_5 (18-30 years) | Age_6 (30-60 years) | Age_7 (>60 years) |       |        |
| (5) Fever | 0 | Count               | 172               | 70                 | 55                  | 82                  | 103                 | 216               | 86    | 784    |
| Yes (1)   |   | % within (5) Fever  | 21.9%             | 8.9%               | 7.0%                | 10.5%               | 13.1%               | 27.6%             | 11.0% | 100.0% |
| No (0)    |   | Yes (1)             |                   |                    |                     |                     |                     |                   |       |        |
|           |   | No (0)              |                   |                    |                     |                     |                     |                   |       |        |

|       |                                         |        |        |        |        |        |        |        |        |
|-------|-----------------------------------------|--------|--------|--------|--------|--------|--------|--------|--------|
|       | % within Age_ Classification            | 83.5%  | 70.7%  | 64.0%  | 58.6%  | 70.5%  | 74.7%  | 90.5%  | 73.9%  |
|       | % of Total                              | 16.2%  | 6.6%   | 5.2%   | 7.7%   | 9.7%   | 20.4%  | 8.1%   | 73.9%  |
| 1     | Count                                   | 34     | 29     | 31     | 58     | 43     | 73     | 9      | 277    |
|       | % within (5) Fever<br>Yes (1)<br>No (0) | 12.3%  | 10.5%  | 11.2%  | 20.9%  | 15.5%  | 26.4%  | 3.2%   | 100.0% |
|       | % within Age_ Classification            | 16.5%  | 29.3%  | 36.0%  | 41.4%  | 29.5%  | 25.3%  | 9.5%   | 26.1%  |
|       | % of Total                              | 3.2%   | 2.7%   | 2.9%   | 5.5%   | 4.1%   | 6.9%   | 0.8%   | 26.1%  |
| Total | Count                                   | 206    | 99     | 86     | 140    | 146    | 289    | 95     | 1061   |
|       | % within (5) Fever<br>Yes (1)<br>No (0) | 19.4%  | 9.3%   | 8.1%   | 13.2%  | 13.8%  | 27.2%  | 9.0%   | 100.0% |
|       | % within Age_ Classification            | 100.0% | 100.0% | 100.0% | 100.0% | 100.0% | 100.0% | 100.0% | 100.0% |
|       | % of Total                              | 19.4%  | 9.3%   | 8.1%   | 13.2%  | 13.8%  | 27.2%  | 9.0%   | 100.0% |

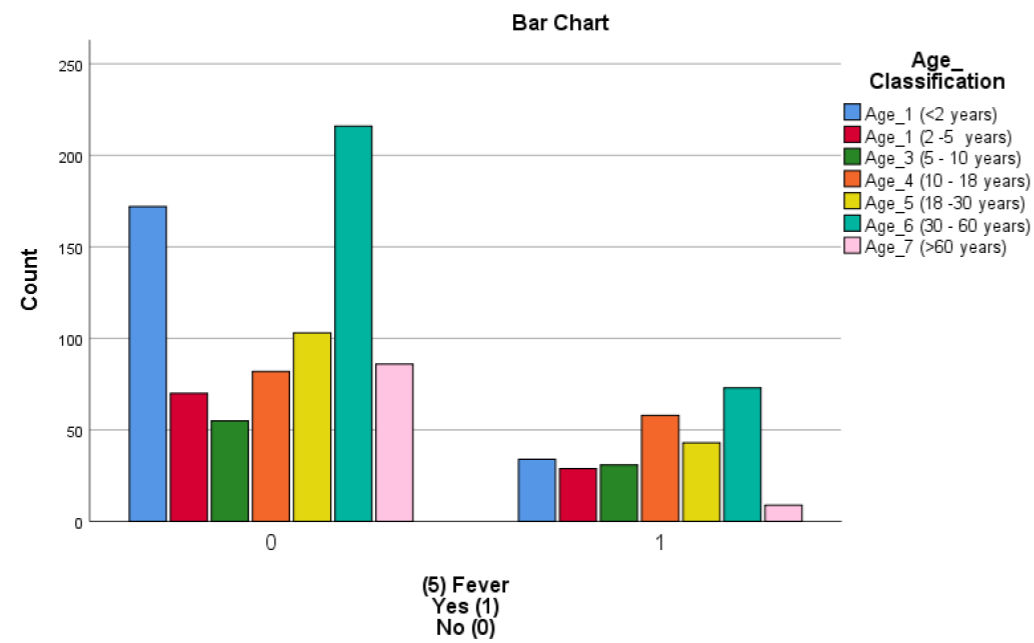

**(6) Dehydration  
Yes (1)  
No (0) \* Age\_ Classification Crosstabulation**

Age\_ Classification

Total

|                              |                              |                              | Age_1 (<2 years) | Age_1 (2 -5 years) | Age_3 (5 - 10 years) | Age_4 (10 - 18 years) | Age_5 (18 -30 years) | Age_6 (30 - 60 years) | Age_7 (>60 years) |        |  |
|------------------------------|------------------------------|------------------------------|------------------|--------------------|----------------------|-----------------------|----------------------|-----------------------|-------------------|--------|--|
| (6) Dehydration              | 0                            | Count                        | 146              | 71                 | 69                   | 111                   | 123                  | 210                   | 64                | 794    |  |
|                              |                              | % within (6) Dehydration     | 18.4%            | 8.9%               | 8.7%                 | 14.0%                 | 15.5%                | 26.4%                 | 8.1%              | 100.0% |  |
|                              |                              | Yes (1)                      |                  |                    |                      |                       |                      |                       |                   |        |  |
|                              |                              | No (0)                       |                  |                    |                      |                       |                      |                       |                   |        |  |
|                              |                              | % within Age_ Classification | 70.9%            | 71.7%              | 80.2%                | 79.3%                 | 84.2%                | 72.7%                 | 67.4%             | 74.8%  |  |
|                              | % of Total                   | 13.8%                        | 6.7%             | 6.5%               | 10.5%                | 11.6%                 | 19.8%                | 6.0%                  | 74.8%             |        |  |
|                              | 1                            | Count                        | 60               | 28                 | 17                   | 29                    | 23                   | 79                    | 31                | 267    |  |
|                              |                              | % within (6) Dehydration     | 22.5%            | 10.5%              | 6.4%                 | 10.9%                 | 8.6%                 | 29.6%                 | 11.6%             | 100.0% |  |
|                              |                              | Yes (1)                      |                  |                    |                      |                       |                      |                       |                   |        |  |
|                              |                              | No (0)                       |                  |                    |                      |                       |                      |                       |                   |        |  |
| % within Age_ Classification |                              | 29.1%                        | 28.3%            | 19.8%              | 20.7%                | 15.8%                 | 27.3%                | 32.6%                 | 25.2%             |        |  |
| % of Total                   | 5.7%                         | 2.6%                         | 1.6%             | 2.7%               | 2.2%                 | 7.4%                  | 2.9%                 | 25.2%                 |                   |        |  |
| Total                        | Count                        | 206                          | 99               | 86                 | 140                  | 146                   | 289                  | 95                    | 1061              |        |  |
|                              | % within (6) Dehydration     | 19.4%                        | 9.3%             | 8.1%               | 13.2%                | 13.8%                 | 27.2%                | 9.0%                  | 100.0%            |        |  |
|                              | Yes (1)                      |                              |                  |                    |                      |                       |                      |                       |                   |        |  |
|                              | No (0)                       |                              |                  |                    |                      |                       |                      |                       |                   |        |  |
|                              | % within Age_ Classification | 100.0%                       | 100.0%           | 100.0%             | 100.0%               | 100.0%                | 100.0%               | 100.0%                | 100.0%            |        |  |
| % of Total                   | 19.4%                        | 9.3%                         | 8.1%             | 13.2%              | 13.8%                | 27.2%                 | 9.0%                 | 100.0%                |                   |        |  |

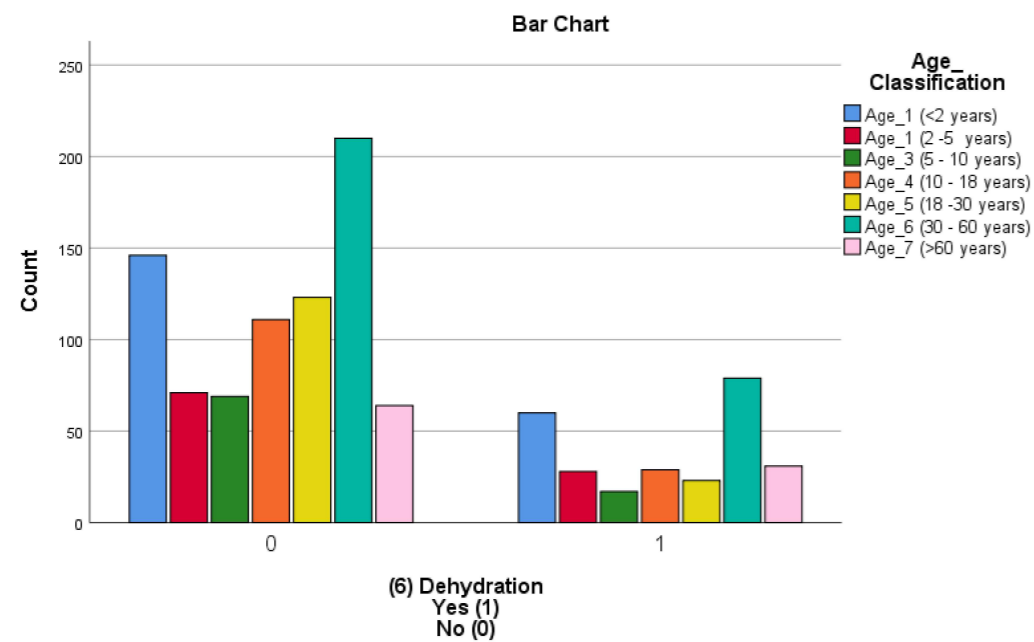

**(7) Other  
Yes (1)  
No (0) \* Age\_ Classification Crosstabulation**

|           |   | Age_ Classification          |                    |                      |                       |                      |                       |                   |        |        |
|-----------|---|------------------------------|--------------------|----------------------|-----------------------|----------------------|-----------------------|-------------------|--------|--------|
|           |   | Age_1 (<2 years)             | Age_1 (2 -5 years) | Age_3 (5 - 10 years) | Age_4 (10 - 18 years) | Age_5 (18 -30 years) | Age_6 (30 - 60 years) | Age_7 (>60 years) | Total  |        |
| (7) Other | 0 | Count                        | 196                | 98                   | 84                    | 118                  | 117                   | 234               | 75     | 922    |
| Yes (1)   |   | % within (7) Other           | 21.3%              | 10.6%                | 9.1%                  | 12.8%                | 12.7%                 | 25.4%             | 8.1%   | 100.0% |
| No (0)    |   | Yes (1)                      |                    |                      |                       |                      |                       |                   |        |        |
|           |   | No (0)                       |                    |                      |                       |                      |                       |                   |        |        |
|           |   | % within Age_ Classification | 95.1%              | 99.0%                | 97.7%                 | 84.3%                | 80.1%                 | 81.0%             | 78.9%  | 86.9%  |
|           |   | % of Total                   | 18.5%              | 9.2%                 | 7.9%                  | 11.1%                | 11.0%                 | 22.1%             | 7.1%   | 86.9%  |
|           | 1 | Count                        | 10                 | 1                    | 2                     | 22                   | 29                    | 55                | 20     | 139    |
|           |   | % within (7) Other           | 7.2%               | 0.7%                 | 1.4%                  | 15.8%                | 20.9%                 | 39.6%             | 14.4%  | 100.0% |
|           |   | Yes (1)                      |                    |                      |                       |                      |                       |                   |        |        |
|           |   | No (0)                       |                    |                      |                       |                      |                       |                   |        |        |
|           |   | % within Age_ Classification | 4.9%               | 1.0%                 | 2.3%                  | 15.7%                | 19.9%                 | 19.0%             | 21.1%  | 13.1%  |
|           |   | % of Total                   | 0.9%               | 0.1%                 | 0.2%                  | 2.1%                 | 2.7%                  | 5.2%              | 1.9%   | 13.1%  |
| Total     |   | Count                        | 206                | 99                   | 86                    | 140                  | 146                   | 289               | 95     | 1061   |
|           |   | % within (7) Other           | 19.4%              | 9.3%                 | 8.1%                  | 13.2%                | 13.8%                 | 27.2%             | 9.0%   | 100.0% |
|           |   | Yes (1)                      |                    |                      |                       |                      |                       |                   |        |        |
|           |   | No (0)                       |                    |                      |                       |                      |                       |                   |        |        |
|           |   | % within Age_ Classification | 100.0%             | 100.0%               | 100.0%                | 100.0%               | 100.0%                | 100.0%            | 100.0% | 100.0% |
|           |   | % of Total                   | 19.4%              | 9.3%                 | 8.1%                  | 13.2%                | 13.8%                 | 27.2%             | 9.0%   | 100.0% |

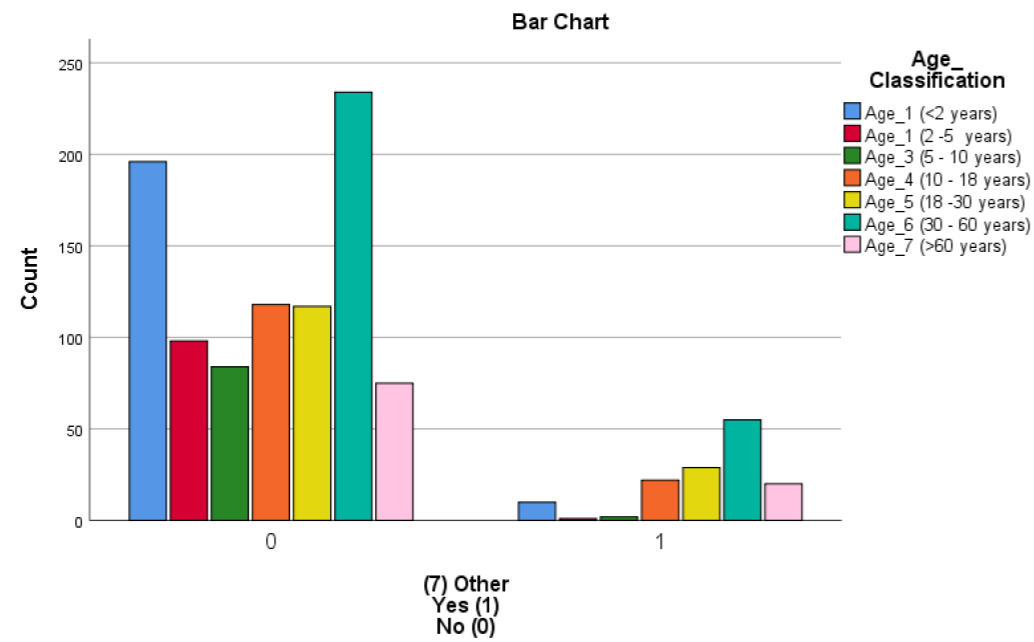

**severity of dehydration**

**(1) Severe (General Inspection: Lethargic, unconscious, floppy, Eyes: Sunken, dry, tears absent, Unable to drink, drinks poorly)**

**(2) Some (Restless, irritable, Sunken, tears absent, Thirsty, drinks eagerly)**

**(3) None (General Inspection Well, alert, Skin Pinch Normal, Eyes Normal, tears present, Tongue Moist, No thirst) \* Age\_ Classification Crosstabulation**

|                         |   | Age_ Classification |                   |                    |                     |                     |                     |                   |       |     |
|-------------------------|---|---------------------|-------------------|--------------------|---------------------|---------------------|---------------------|-------------------|-------|-----|
|                         |   | Age_1 (<2 years)    | Age_1 (2-5 years) | Age_3 (5-10 years) | Age_4 (10-18 years) | Age_5 (18-30 years) | Age_6 (30-60 years) | Age_7 (>60 years) | Total |     |
| severity of dehydration | 1 | Count               | 41                | 26                 | 11                  | 15                  | 11                  | 44                | 26    | 174 |

|                                                                                                                                                                                                                                                                                                                                                               |                                                                                                                                          |       |       |       |       |       |       |       |        |     |
|---------------------------------------------------------------------------------------------------------------------------------------------------------------------------------------------------------------------------------------------------------------------------------------------------------------------------------------------------------------|------------------------------------------------------------------------------------------------------------------------------------------|-------|-------|-------|-------|-------|-------|-------|--------|-----|
| (1) Severe (General Inspection:<br>Lethargic, unconscious, floppy,<br>Eyes: Sunken, dry,tears absent,<br>Unable to drink, drinks poorly)<br>(2) Some (Restless, irritable,<br>Sunken, tears absent, Thirsty,<br>drinks eagerly)<br>(3) None (General Inspection<br>Well, alert, Skin Pinch Normal,<br>Eyes Normal, tears present,<br>Tongue Moist, No thirst) | % within severity of dehydration                                                                                                         | 23.6% | 14.9% | 6.3%  | 8.6%  | 6.3%  | 25.3% | 14.9% | 100.0% |     |
|                                                                                                                                                                                                                                                                                                                                                               | (1) Severe (General Inspection:<br>Lethargic, unconscious, floppy,<br>Eyes: Sunken, dry,tears absent,<br>Unable to drink, drinks poorly) |       |       |       |       |       |       |       |        |     |
|                                                                                                                                                                                                                                                                                                                                                               | (2) Some (Restless, irritable,<br>Sunken, tears absent, Thirsty,<br>drinks eagerly)                                                      |       |       |       |       |       |       |       |        |     |
|                                                                                                                                                                                                                                                                                                                                                               | (3) None (General Inspection<br>Well, alert, Skin Pinch Normal,<br>Eyes Normal, tears present,<br>Tongue Moist, No thirst)               |       |       |       |       |       |       |       |        |     |
|                                                                                                                                                                                                                                                                                                                                                               | % within Age_ Classification                                                                                                             | 21.6% | 27.7% | 13.8% | 11.4% | 8.0%  | 15.9% | 28.0% | 17.3%  |     |
|                                                                                                                                                                                                                                                                                                                                                               | % of Total                                                                                                                               | 4.1%  | 2.6%  | 1.1%  | 1.5%  | 1.1%  | 4.4%  | 2.6%  | 17.3%  |     |
|                                                                                                                                                                                                                                                                                                                                                               | 2                                                                                                                                        | Count | 90    | 37    | 34    | 64    | 59    | 164   | 59     | 507 |
|                                                                                                                                                                                                                                                                                                                                                               | % within severity of dehydration                                                                                                         | 17.8% | 7.3%  | 6.7%  | 12.6% | 11.6% | 32.3% | 11.6% | 100.0% |     |
|                                                                                                                                                                                                                                                                                                                                                               | (1) Severe (General Inspection:<br>Lethargic, unconscious, floppy,<br>Eyes: Sunken, dry,tears absent,<br>Unable to drink, drinks poorly) |       |       |       |       |       |       |       |        |     |
|                                                                                                                                                                                                                                                                                                                                                               | (2) Some (Restless, irritable,<br>Sunken, tears absent, Thirsty,<br>drinks eagerly)                                                      |       |       |       |       |       |       |       |        |     |
| (3) None (General Inspection<br>Well, alert, Skin Pinch Normal,<br>Eyes Normal, tears present,<br>Tongue Moist, No thirst)                                                                                                                                                                                                                                    |                                                                                                                                          |       |       |       |       |       |       |       |        |     |
| % within Age_ Classification                                                                                                                                                                                                                                                                                                                                  | 47.4%                                                                                                                                    | 39.4% | 42.5% | 48.5% | 43.1% | 59.2% | 63.4% | 50.5% |        |     |
| % of Total                                                                                                                                                                                                                                                                                                                                                    | 9.0%                                                                                                                                     | 3.7%  | 3.4%  | 6.4%  | 5.9%  | 16.4% | 5.9%  | 50.5% |        |     |
| 3                                                                                                                                                                                                                                                                                                                                                             | Count                                                                                                                                    | 59    | 31    | 35    | 53    | 67    | 69    | 8     | 322    |     |



|       |                                                                                                                                                                                                                                                                                                                                                                                                   |        |        |        |        |        |        |        |        |
|-------|---------------------------------------------------------------------------------------------------------------------------------------------------------------------------------------------------------------------------------------------------------------------------------------------------------------------------------------------------------------------------------------------------|--------|--------|--------|--------|--------|--------|--------|--------|
|       | % within severity of dehydration<br>(1) Severe (General Inspection:<br>Lethargic, unconscious, floppy,<br>Eyes: Sunken, dry,tears absent,<br>Unable to drink, drinks poorly)<br>(2) Some (Restless, irritable,<br>Sunken, tears absent, Thirsty,<br>drinks eagerly)<br>(3) None (General Inspection<br>Well, alert, Skin Pinch Normal,<br>Eyes Normal, tears present,<br>Tongue Moist, No thirst) | 18.3%  | 9.6%   | 10.9%  | 16.5%  | 20.8%  | 21.4%  | 2.5%   | 100.0% |
|       | % within Age_ Classification                                                                                                                                                                                                                                                                                                                                                                      | 31.1%  | 33.0%  | 43.8%  | 40.2%  | 48.9%  | 24.9%  | 8.6%   | 32.1%  |
|       | % of Total                                                                                                                                                                                                                                                                                                                                                                                        | 5.9%   | 3.1%   | 3.5%   | 5.3%   | 6.7%   | 6.9%   | 0.8%   | 32.1%  |
| Total | Count                                                                                                                                                                                                                                                                                                                                                                                             | 190    | 94     | 80     | 132    | 137    | 277    | 93     | 1003   |
|       | % within severity of dehydration<br>(1) Severe (General Inspection:<br>Lethargic, unconscious, floppy,<br>Eyes: Sunken, dry,tears absent,<br>Unable to drink, drinks poorly)<br>(2) Some (Restless, irritable,<br>Sunken, tears absent, Thirsty,<br>drinks eagerly)<br>(3) None (General Inspection<br>Well, alert, Skin Pinch Normal,<br>Eyes Normal, tears present,<br>Tongue Moist, No thirst) | 18.9%  | 9.4%   | 8.0%   | 13.2%  | 13.7%  | 27.6%  | 9.3%   | 100.0% |
|       | % within Age_ Classification                                                                                                                                                                                                                                                                                                                                                                      | 100.0% | 100.0% | 100.0% | 100.0% | 100.0% | 100.0% | 100.0% | 100.0% |
|       | % of Total                                                                                                                                                                                                                                                                                                                                                                                        | 18.9%  | 9.4%   | 8.0%   | 13.2%  | 13.7%  | 27.6%  | 9.3%   | 100.0% |

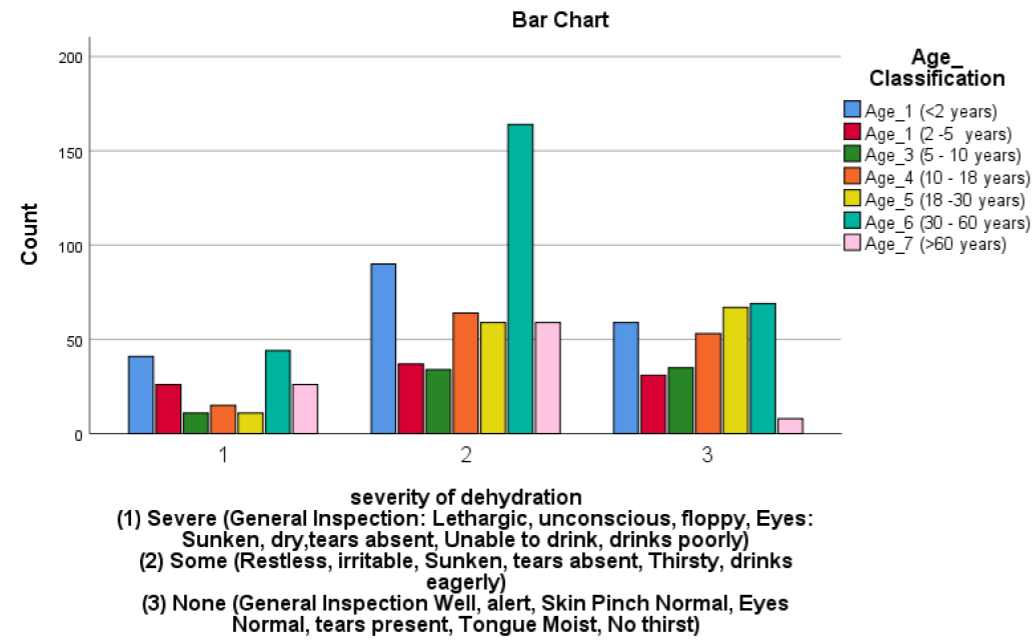

**Hemoglobin (g/dL) Class**

- 1: Less than 10
- 2: 10 - 12
- 3: 12 - 17

**4: more than 17 \* Age\_ Classification Crosstabulation**

|                         |   | Age_ Classification              |                   |                    |                     |                     |                     |                   | Total |        |
|-------------------------|---|----------------------------------|-------------------|--------------------|---------------------|---------------------|---------------------|-------------------|-------|--------|
|                         |   | Age_1 (<2 years)                 | Age_1 (2-5 years) | Age_3 (5-10 years) | Age_4 (10-18 years) | Age_5 (18-30 years) | Age_6 (30-60 years) | Age_7 (>60 years) |       |        |
| Hemoglobin (g/dL) Class | 1 | Count                            | 104               | 19                 | 10                  | 5                   | 15                  | 30                | 14    | 197    |
|                         |   | % within Hemoglobin (g/dL) Class | 52.8%             | 9.6%               | 5.1%                | 2.5%                | 7.6%                | 15.2%             | 7.1%  | 100.0% |
|                         |   | % within Age_ Classification     | 74.3%             | 29.7%              | 16.9%               | 4.6%                | 11.9%               | 11.5%             | 16.1% | 23.3%  |
|                         |   | % of Total                       | 12.3%             | 2.2%               | 1.2%                | 0.6%                | 1.8%                | 3.6%              | 1.7%  | 23.3%  |
|                         | 2 | Count                            | 25                | 30                 | 23                  | 40                  | 41                  | 58                | 26    | 243    |

|       |                                                                                                       |        |        |        |        |        |        |        |        |
|-------|-------------------------------------------------------------------------------------------------------|--------|--------|--------|--------|--------|--------|--------|--------|
|       | % within Hemoglobin (g/dL)<br>Class<br>1: Less than 10<br>2: 10 - 12<br>3: 12 - 17<br>4: more than 17 | 10.3%  | 12.3%  | 9.5%   | 16.5%  | 16.9%  | 23.9%  | 10.7%  | 100.0% |
|       | % within Age_ Classification                                                                          | 17.9%  | 46.9%  | 39.0%  | 37.0%  | 32.5%  | 22.2%  | 29.9%  | 28.8%  |
|       | % of Total                                                                                            | 3.0%   | 3.6%   | 2.7%   | 4.7%   | 4.9%   | 6.9%   | 3.1%   | 28.8%  |
| 3     | Count                                                                                                 | 11     | 15     | 25     | 61     | 67     | 163    | 45     | 387    |
|       | % within Hemoglobin (g/dL)<br>Class<br>1: Less than 10<br>2: 10 - 12<br>3: 12 - 17<br>4: more than 17 | 2.8%   | 3.9%   | 6.5%   | 15.8%  | 17.3%  | 42.1%  | 11.6%  | 100.0% |
|       | % within Age_ Classification                                                                          | 7.9%   | 23.4%  | 42.4%  | 56.5%  | 53.2%  | 62.5%  | 51.7%  | 45.8%  |
|       | % of Total                                                                                            | 1.3%   | 1.8%   | 3.0%   | 7.2%   | 7.9%   | 19.3%  | 5.3%   | 45.8%  |
| 4     | Count                                                                                                 | 0      | 0      | 1      | 2      | 3      | 10     | 2      | 18     |
|       | % within Hemoglobin (g/dL)<br>Class<br>1: Less than 10<br>2: 10 - 12<br>3: 12 - 17<br>4: more than 17 | 0.0%   | 0.0%   | 5.6%   | 11.1%  | 16.7%  | 55.6%  | 11.1%  | 100.0% |
|       | % within Age_ Classification                                                                          | 0.0%   | 0.0%   | 1.7%   | 1.9%   | 2.4%   | 3.8%   | 2.3%   | 2.1%   |
|       | % of Total                                                                                            | 0.0%   | 0.0%   | 0.1%   | 0.2%   | 0.4%   | 1.2%   | 0.2%   | 2.1%   |
| Total | Count                                                                                                 | 140    | 64     | 59     | 108    | 126    | 261    | 87     | 845    |
|       | % within Hemoglobin (g/dL)<br>Class<br>1: Less than 10<br>2: 10 - 12<br>3: 12 - 17<br>4: more than 17 | 16.6%  | 7.6%   | 7.0%   | 12.8%  | 14.9%  | 30.9%  | 10.3%  | 100.0% |
|       | % within Age_ Classification                                                                          | 100.0% | 100.0% | 100.0% | 100.0% | 100.0% | 100.0% | 100.0% | 100.0% |
|       | % of Total                                                                                            | 16.6%  | 7.6%   | 7.0%   | 12.8%  | 14.9%  | 30.9%  | 10.3%  | 100.0% |

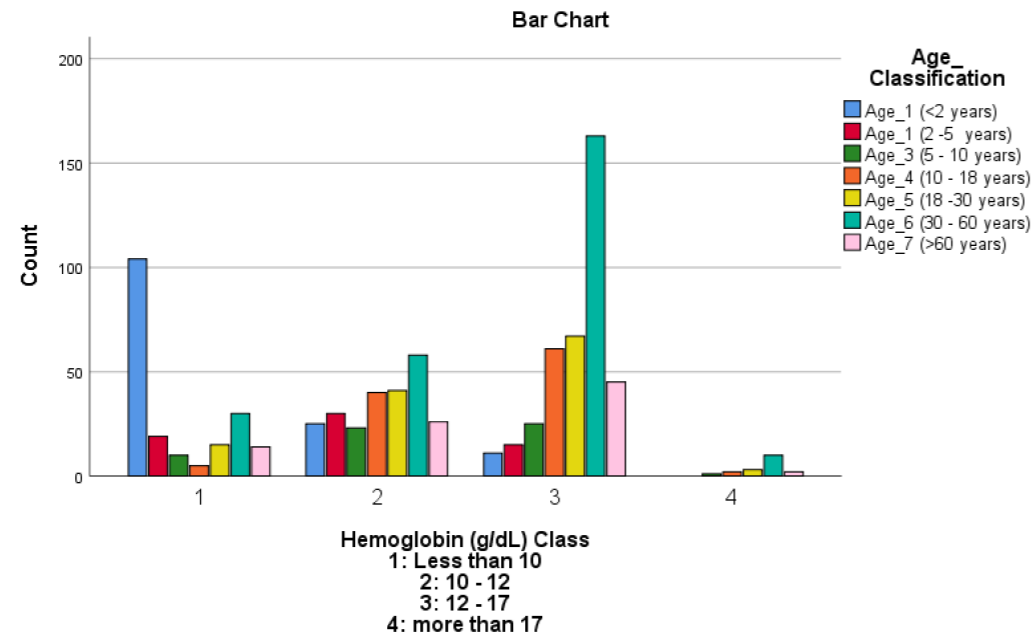

**Platelet\_Classification**

- 1: Less than 15
- 2: 15 - 30
- 3: 30 - 50
- 4: 50 - 150
- 5: 150 - 450

**6: more than 450 \* Age\_Classification Crosstabulation**

| Platelet_Classification | 1 | Count                            | Age_Classification |                   |                    |                     |                     | Total |                     |                   |
|-------------------------|---|----------------------------------|--------------------|-------------------|--------------------|---------------------|---------------------|-------|---------------------|-------------------|
|                         |   |                                  | Age_1 (<2 years)   | Age_2 (2-5 years) | Age_3 (5-10 years) | Age_4 (10-18 years) | Age_5 (18-30 years) |       | Age_6 (30-60 years) | Age_7 (>60 years) |
| 1: Less than 15         |   |                                  | 0                  | 0                 | 0                  | 1                   | 0                   | 1     | 1                   | 3                 |
| 2: 15 - 30              |   | % within Platelet_Classification | 0.0%               | 0.0%              | 0.0%               | 33.3%               | 0.0%                | 33.3% | 33.3%               | 100.0%            |
| 3: 30 - 50              |   | 1: Less than 15                  |                    |                   |                    |                     |                     |       |                     |                   |
| 4: 50 - 150             |   | 2: 15 - 30                       |                    |                   |                    |                     |                     |       |                     |                   |
| 5: 150 - 450            |   | 3: 30 - 50                       |                    |                   |                    |                     |                     |       |                     |                   |
| 6: more than 450        |   | 4: 50 - 150                      |                    |                   |                    |                     |                     |       |                     |                   |
|                         |   | 5: 150 - 450                     |                    |                   |                    |                     |                     |       |                     |                   |
|                         |   | 6: more than 450                 |                    |                   |                    |                     |                     |       |                     |                   |
|                         |   | % within Age_Classification      | 0.0%               | 0.0%              | 0.0%               | 1.0%                | 0.0%                | 0.4%  | 1.2%                | 0.4%              |

|   |                                   |       |      |       |       |       |       |       |        |
|---|-----------------------------------|-------|------|-------|-------|-------|-------|-------|--------|
|   | % of Total                        | 0.0%  | 0.0% | 0.0%  | 0.1%  | 0.0%  | 0.1%  | 0.1%  | 0.4%   |
| 2 | Count                             | 0     | 0    | 1     | 2     | 0     | 2     | 1     | 6      |
|   | % within Platelet_ Classification | 0.0%  | 0.0% | 16.7% | 33.3% | 0.0%  | 33.3% | 16.7% | 100.0% |
|   | 1: Less than 15                   |       |      |       |       |       |       |       |        |
|   | 2: 15 - 30                        |       |      |       |       |       |       |       |        |
|   | 3: 30 - 50                        |       |      |       |       |       |       |       |        |
|   | 4: 50 - 150                       |       |      |       |       |       |       |       |        |
|   | 5: 150 - 450                      |       |      |       |       |       |       |       |        |
|   | 6: more than 450                  |       |      |       |       |       |       |       |        |
|   | % within Age_ Classification      | 0.0%  | 0.0% | 1.8%  | 1.9%  | 0.0%  | 0.8%  | 1.2%  | 0.7%   |
|   | % of Total                        | 0.0%  | 0.0% | 0.1%  | 0.2%  | 0.0%  | 0.2%  | 0.1%  | 0.7%   |
| 3 | Count                             | 0     | 0    | 0     | 1     | 0     | 1     | 2     | 4      |
|   | % within Platelet_ Classification | 0.0%  | 0.0% | 0.0%  | 25.0% | 0.0%  | 25.0% | 50.0% | 100.0% |
|   | 1: Less than 15                   |       |      |       |       |       |       |       |        |
|   | 2: 15 - 30                        |       |      |       |       |       |       |       |        |
|   | 3: 30 - 50                        |       |      |       |       |       |       |       |        |
|   | 4: 50 - 150                       |       |      |       |       |       |       |       |        |
|   | 5: 150 - 450                      |       |      |       |       |       |       |       |        |
|   | 6: more than 450                  |       |      |       |       |       |       |       |        |
|   | % within Age_ Classification      | 0.0%  | 0.0% | 0.0%  | 1.0%  | 0.0%  | 0.4%  | 2.4%  | 0.5%   |
|   | % of Total                        | 0.0%  | 0.0% | 0.0%  | 0.1%  | 0.0%  | 0.1%  | 0.2%  | 0.5%   |
| 4 | Count                             | 4     | 3    | 2     | 8     | 10    | 17    | 6     | 50     |
|   | % within Platelet_ Classification | 8.0%  | 6.0% | 4.0%  | 16.0% | 20.0% | 34.0% | 12.0% | 100.0% |
|   | 1: Less than 15                   |       |      |       |       |       |       |       |        |
|   | 2: 15 - 30                        |       |      |       |       |       |       |       |        |
|   | 3: 30 - 50                        |       |      |       |       |       |       |       |        |
|   | 4: 50 - 150                       |       |      |       |       |       |       |       |        |
|   | 5: 150 - 450                      |       |      |       |       |       |       |       |        |
|   | 6: more than 450                  |       |      |       |       |       |       |       |        |
|   | % within Age_ Classification      | 2.9%  | 4.8% | 3.5%  | 7.7%  | 8.0%  | 6.8%  | 7.1%  | 6.1%   |
|   | % of Total                        | 0.5%  | 0.4% | 0.2%  | 1.0%  | 1.2%  | 2.1%  | 0.7%  | 6.1%   |
| 5 | Count                             | 84    | 41   | 40    | 79    | 106   | 215   | 71    | 636    |
|   | % within Platelet_ Classification | 13.2% | 6.4% | 6.3%  | 12.4% | 16.7% | 33.8% | 11.2% | 100.0% |
|   | 1: Less than 15                   |       |      |       |       |       |       |       |        |
|   | 2: 15 - 30                        |       |      |       |       |       |       |       |        |
|   | 3: 30 - 50                        |       |      |       |       |       |       |       |        |
|   | 4: 50 - 150                       |       |      |       |       |       |       |       |        |
|   | 5: 150 - 450                      |       |      |       |       |       |       |       |        |
|   | 6: more than 450                  |       |      |       |       |       |       |       |        |

|       |                                   |        |        |        |        |        |        |        |        |
|-------|-----------------------------------|--------|--------|--------|--------|--------|--------|--------|--------|
|       | % within Age_ Classification      | 61.3%  | 65.1%  | 70.2%  | 76.0%  | 84.8%  | 86.0%  | 83.5%  | 77.5%  |
|       | % of Total                        | 10.2%  | 5.0%   | 4.9%   | 9.6%   | 12.9%  | 26.2%  | 8.6%   | 77.5%  |
| 6     | Count                             | 49     | 19     | 14     | 13     | 9      | 14     | 4      | 122    |
|       | % within Platelet_ Classification | 40.2%  | 15.6%  | 11.5%  | 10.7%  | 7.4%   | 11.5%  | 3.3%   | 100.0% |
|       | 1: Less than 15                   |        |        |        |        |        |        |        |        |
|       | 2: 15 - 30                        |        |        |        |        |        |        |        |        |
|       | 3: 30 - 50                        |        |        |        |        |        |        |        |        |
|       | 4: 50 - 150                       |        |        |        |        |        |        |        |        |
|       | 5: 150 - 450                      |        |        |        |        |        |        |        |        |
|       | 6: more than 450                  |        |        |        |        |        |        |        |        |
|       | % within Age_ Classification      | 35.8%  | 30.2%  | 24.6%  | 12.5%  | 7.2%   | 5.6%   | 4.7%   | 14.9%  |
|       | % of Total                        | 6.0%   | 2.3%   | 1.7%   | 1.6%   | 1.1%   | 1.7%   | 0.5%   | 14.9%  |
| Total | Count                             | 137    | 63     | 57     | 104    | 125    | 250    | 85     | 821    |
|       | % within Platelet_ Classification | 16.7%  | 7.7%   | 6.9%   | 12.7%  | 15.2%  | 30.5%  | 10.4%  | 100.0% |
|       | 1: Less than 15                   |        |        |        |        |        |        |        |        |
|       | 2: 15 - 30                        |        |        |        |        |        |        |        |        |
|       | 3: 30 - 50                        |        |        |        |        |        |        |        |        |
|       | 4: 50 - 150                       |        |        |        |        |        |        |        |        |
|       | 5: 150 - 450                      |        |        |        |        |        |        |        |        |
|       | 6: more than 450                  |        |        |        |        |        |        |        |        |
|       | % within Age_ Classification      | 100.0% | 100.0% | 100.0% | 100.0% | 100.0% | 100.0% | 100.0% | 100.0% |
|       | % of Total                        | 16.7%  | 7.7%   | 6.9%   | 12.7%  | 15.2%  | 30.5%  | 10.4%  | 100.0% |

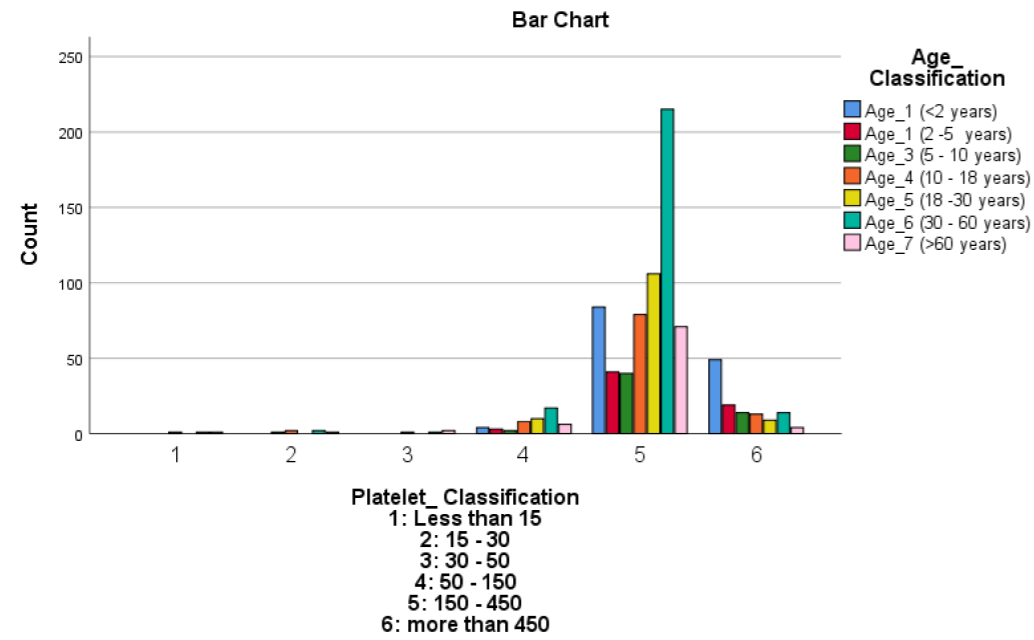

**Serum Creatinine\_Classification**  
**1: less than 0.6**  
**2: 0.6 - 1.3**  
**3: more than 1.3 \* Age\_ Classification Crosstabulation**

|                                 |                              | Age_ Classification       |                    |                      |                       |                      |                       |                   |       |        |
|---------------------------------|------------------------------|---------------------------|--------------------|----------------------|-----------------------|----------------------|-----------------------|-------------------|-------|--------|
|                                 |                              | Age_1 (<2 years)          | Age_1 (2 -5 years) | Age_3 (5 - 10 years) | Age_4 (10 - 18 years) | Age_5 (18 -30 years) | Age_6 (30 - 60 years) | Age_7 (>60 years) | Total |        |
| Serum Creatinine_Classification | 1                            | Count                     | 93                 | 40                   | 28                    | 48                   | 41                    | 54                | 7     | 311    |
|                                 | 1: less than 0.6             | % within Serum            | 29.9%              | 12.9%                | 9.0%                  | 15.4%                | 13.2%                 | 17.4%             | 2.3%  | 100.0% |
|                                 | 2: 0.6 - 1.3                 | Creatinine_Classification |                    |                      |                       |                      |                       |                   |       |        |
|                                 | 3: more than 1.3             | 1: less than 0.6          |                    |                      |                       |                      |                       |                   |       |        |
|                                 |                              | 2: 0.6 - 1.3              |                    |                      |                       |                      |                       |                   |       |        |
|                                 |                              | 3: more than 1.3          |                    |                      |                       |                      |                       |                   |       |        |
|                                 | % within Age_ Classification | 68.9%                     | 65.6%              | 53.8%                | 44.0%                 | 36.0%                | 20.9%                 | 8.4%              | 38.3% |        |
|                                 | % of Total                   | 11.5%                     | 4.9%               | 3.4%                 | 5.9%                  | 5.0%                 | 6.7%                  | 0.9%              | 38.3% |        |
| 2                               | Count                        | 34                        | 14                 | 16                   | 50                    | 63                   | 135                   | 32                | 344   |        |

|       |                                                                                                  |        |        |        |        |        |        |        |        |
|-------|--------------------------------------------------------------------------------------------------|--------|--------|--------|--------|--------|--------|--------|--------|
|       | % within Serum Creatinine Classification<br>1: less than 0.6<br>2: 0.6 - 1.3<br>3: more than 1.3 | 9.9%   | 4.1%   | 4.7%   | 14.5%  | 18.3%  | 39.2%  | 9.3%   | 100.0% |
|       | % within Age Classification                                                                      | 25.2%  | 23.0%  | 30.8%  | 45.9%  | 55.3%  | 52.3%  | 38.6%  | 42.4%  |
|       | % of Total                                                                                       | 4.2%   | 1.7%   | 2.0%   | 6.2%   | 7.8%   | 16.6%  | 3.9%   | 42.4%  |
| 3     | Count                                                                                            | 8      | 7      | 8      | 11     | 10     | 69     | 44     | 157    |
|       | % within Serum Creatinine Classification<br>1: less than 0.6<br>2: 0.6 - 1.3<br>3: more than 1.3 | 5.1%   | 4.5%   | 5.1%   | 7.0%   | 6.4%   | 43.9%  | 28.0%  | 100.0% |
|       | % within Age Classification                                                                      | 5.9%   | 11.5%  | 15.4%  | 10.1%  | 8.8%   | 26.7%  | 53.0%  | 19.3%  |
|       | % of Total                                                                                       | 1.0%   | 0.9%   | 1.0%   | 1.4%   | 1.2%   | 8.5%   | 5.4%   | 19.3%  |
| Total | Count                                                                                            | 135    | 61     | 52     | 109    | 114    | 258    | 83     | 812    |
|       | % within Serum Creatinine Classification<br>1: less than 0.6<br>2: 0.6 - 1.3<br>3: more than 1.3 | 16.6%  | 7.5%   | 6.4%   | 13.4%  | 14.0%  | 31.8%  | 10.2%  | 100.0% |
|       | % within Age Classification                                                                      | 100.0% | 100.0% | 100.0% | 100.0% | 100.0% | 100.0% | 100.0% | 100.0% |
|       | % of Total                                                                                       | 16.6%  | 7.5%   | 6.4%   | 13.4%  | 14.0%  | 31.8%  | 10.2%  | 100.0% |



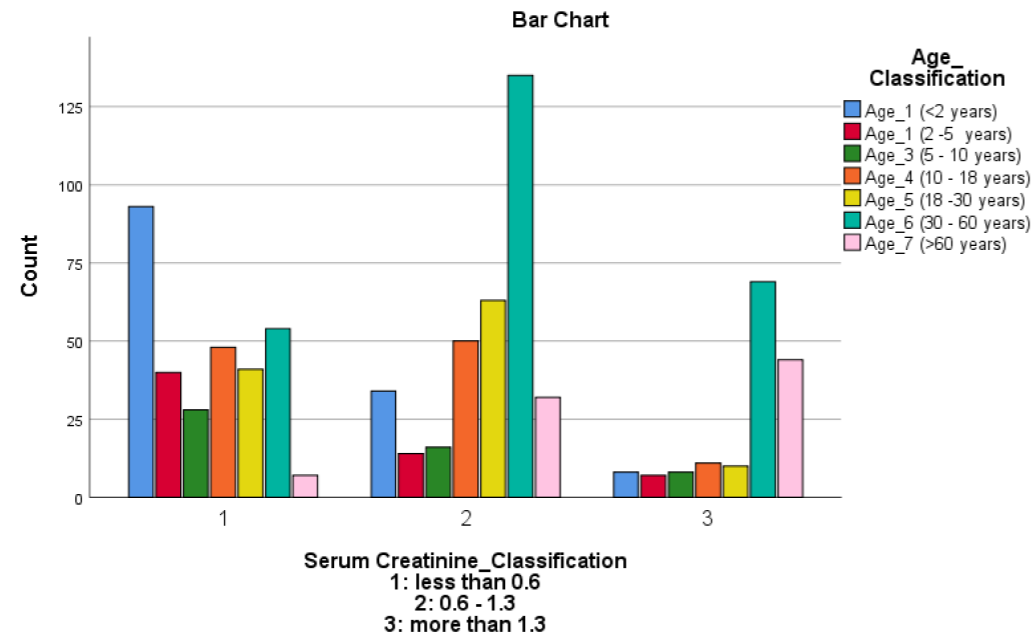

**Urea\_Class**  
**1: 10 - 50**  
**2: more than 50 \* Age\_Classification Crosstabulation**

|                       |                     | Age_Classification          |                    |                      |                       |                      |                       |                   | Total      |        |
|-----------------------|---------------------|-----------------------------|--------------------|----------------------|-----------------------|----------------------|-----------------------|-------------------|------------|--------|
|                       |                     | Age_1 (<2 years)            | Age_1 (2 -5 years) | Age_3 (5 - 10 years) | Age_4 (10 - 18 years) | Age_5 (18 -30 years) | Age_6 (30 - 60 years) | Age_7 (>60 years) |            |        |
| Urea_Class 1: 10 - 50 | Count               | 113                         | 42                 | 36                   | 90                    | 110                  | 208                   | 40                | 639        |        |
|                       | % within Urea_Class | 17.7%                       | 6.6%               | 5.6%                 | 14.1%                 | 17.2%                | 32.6%                 | 6.3%              | 100.0%     |        |
|                       | 2: more than 50     | Count                       | 25                 | 19                   | 15                    | 17                   | 7                     | 55                | 44         | 182    |
|                       |                     | % within Urea_Class         | 13.7%              | 10.4%                | 8.2%                  | 9.3%                 | 3.8%                  | 30.2%             | 24.2%      | 100.0% |
|                       |                     | % within Age_Classification | 18.1%              | 31.1%                | 29.4%                 | 15.9%                | 6.0%                  | 20.9%             | 52.4%      | 22.2%  |
| % of Total            | 3.0%                | 2.3%                        | 1.8%               | 2.1%                 | 0.9%                  | 6.7%                 | 5.4%                  | 22.2%             |            |        |
| <b>Total</b>          | <b>Count</b>        | <b>138</b>                  | <b>61</b>          | <b>51</b>            | <b>107</b>            | <b>117</b>           | <b>263</b>            | <b>84</b>         | <b>821</b> |        |

|                              |        |        |        |        |        |        |        |        |
|------------------------------|--------|--------|--------|--------|--------|--------|--------|--------|
| % within Urea_Class          | 16.8%  | 7.4%   | 6.2%   | 13.0%  | 14.3%  | 32.0%  | 10.2%  | 100.0% |
| 1: 10 - 50                   |        |        |        |        |        |        |        |        |
| 2: more than 50              |        |        |        |        |        |        |        |        |
| % within Age_ Classification | 100.0% | 100.0% | 100.0% | 100.0% | 100.0% | 100.0% | 100.0% | 100.0% |
| % of Total                   | 16.8%  | 7.4%   | 6.2%   | 13.0%  | 14.3%  | 32.0%  | 10.2%  | 100.0% |

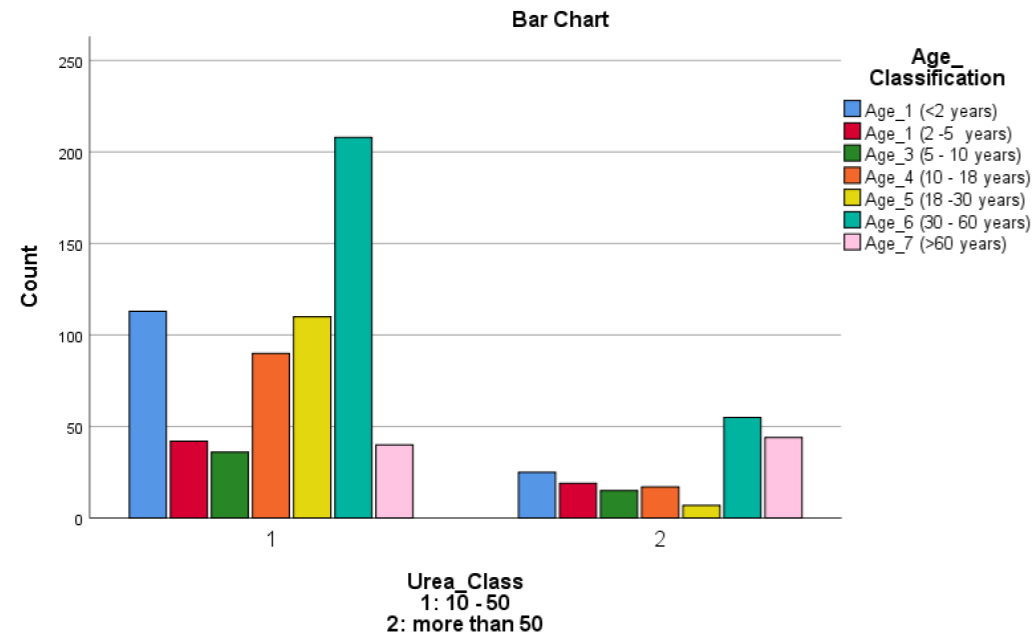

**WBC\_Class**  
**1: less than 4.5**  
**2: 4.5 - 10**  
**3: more than 10 \* Age\_ Classification Crosstabulation**

| WBC_Class        | 1 | Count                        | Age_ Classification |                    |                      |                       |                      |                       |                   | Total  |
|------------------|---|------------------------------|---------------------|--------------------|----------------------|-----------------------|----------------------|-----------------------|-------------------|--------|
|                  |   |                              | Age_1 (<2 years)    | Age_1 (2 -5 years) | Age_3 (5 - 10 years) | Age_4 (10 - 18 years) | Age_5 (18 -30 years) | Age_6 (30 - 60 years) | Age_7 (>60 years) |        |
| 1: less than 4.5 |   | 4                            | 2                   | 3                  | 6                    | 5                     | 12                   | 2                     | 34                |        |
| 2: 4.5 - 10      |   | % within WBC_Class           | 11.8%               | 5.9%               | 8.8%                 | 17.6%                 | 14.7%                | 35.3%                 | 5.9%              | 100.0% |
| 3: more than 10  |   | 1: less than 4.5             |                     |                    |                      |                       |                      |                       |                   |        |
|                  |   | 2: 4.5 - 10                  |                     |                    |                      |                       |                      |                       |                   |        |
|                  |   | 3: more than 10              |                     |                    |                      |                       |                      |                       |                   |        |
|                  |   | % within Age_ Classification | 3.6%                | 4.1%               | 5.8%                 | 6.6%                  | 4.4%                 | 4.8%                  | 2.5%              | 4.6%   |

|       |                             |        |        |        |        |        |        |        |        |
|-------|-----------------------------|--------|--------|--------|--------|--------|--------|--------|--------|
|       | % of Total                  | 0.5%   | 0.3%   | 0.4%   | 0.8%   | 0.7%   | 1.6%   | 0.3%   | 4.6%   |
| 2     | Count                       | 32     | 17     | 14     | 34     | 65     | 107    | 26     | 295    |
|       | % within WBC_Class          | 10.8%  | 5.8%   | 4.7%   | 11.5%  | 22.0%  | 36.3%  | 8.8%   | 100.0% |
|       | 1: less than 4.5            |        |        |        |        |        |        |        |        |
|       | 2: 4.5 - 10                 |        |        |        |        |        |        |        |        |
|       | 3: more than 10             |        |        |        |        |        |        |        |        |
|       | % within Age_Classification | 29.1%  | 34.7%  | 26.9%  | 37.4%  | 57.0%  | 43.0%  | 32.9%  | 39.7%  |
|       | % of Total                  | 4.3%   | 2.3%   | 1.9%   | 4.6%   | 8.7%   | 14.4%  | 3.5%   | 39.7%  |
| 3     | Count                       | 74     | 30     | 35     | 51     | 44     | 130    | 51     | 415    |
|       | % within WBC_Class          | 17.8%  | 7.2%   | 8.4%   | 12.3%  | 10.6%  | 31.3%  | 12.3%  | 100.0% |
|       | 1: less than 4.5            |        |        |        |        |        |        |        |        |
|       | 2: 4.5 - 10                 |        |        |        |        |        |        |        |        |
|       | 3: more than 10             |        |        |        |        |        |        |        |        |
|       | % within Age_Classification | 67.3%  | 61.2%  | 67.3%  | 56.0%  | 38.6%  | 52.2%  | 64.6%  | 55.8%  |
|       | % of Total                  | 9.9%   | 4.0%   | 4.7%   | 6.9%   | 5.9%   | 17.5%  | 6.9%   | 55.8%  |
| Total | Count                       | 110    | 49     | 52     | 91     | 114    | 249    | 79     | 744    |
|       | % within WBC_Class          | 14.8%  | 6.6%   | 7.0%   | 12.2%  | 15.3%  | 33.5%  | 10.6%  | 100.0% |
|       | 1: less than 4.5            |        |        |        |        |        |        |        |        |
|       | 2: 4.5 - 10                 |        |        |        |        |        |        |        |        |
|       | 3: more than 10             |        |        |        |        |        |        |        |        |
|       | % within Age_Classification | 100.0% | 100.0% | 100.0% | 100.0% | 100.0% | 100.0% | 100.0% | 100.0% |
|       | % of Total                  | 14.8%  | 6.6%   | 7.0%   | 12.2%  | 15.3%  | 33.5%  | 10.6%  | 100.0% |

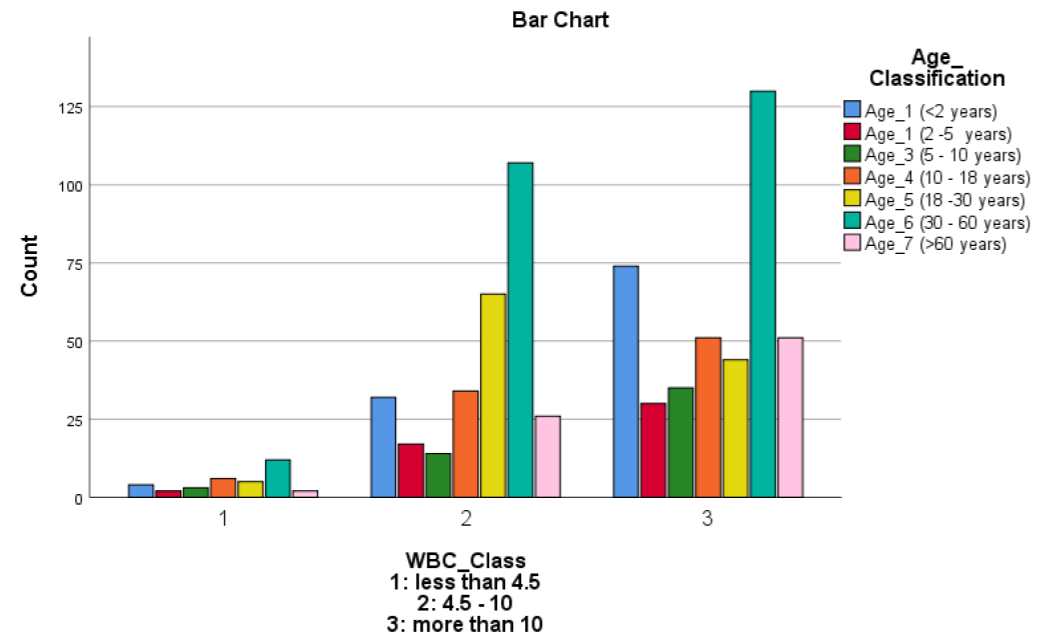

**RandomGlucose\_Class**

1: less than 70

2: 70 - 120

3: 120 - 200

**4: more than 200 \* Age\_ Classification Crosstabulation**

|                     |                  | Age_ Classification          |                    |                      |                       |                      |                       |                   |       |        |
|---------------------|------------------|------------------------------|--------------------|----------------------|-----------------------|----------------------|-----------------------|-------------------|-------|--------|
|                     |                  | Age_1 (<2 years)             | Age_2 (2 -5 years) | Age_3 (5 - 10 years) | Age_4 (10 - 18 years) | Age_5 (18 -30 years) | Age_6 (30 - 60 years) | Age_7 (>60 years) | Total |        |
| RandomGlucose_Class | 1                | Count                        | 7                  | 1                    | 1                     | 4                    | 6                     | 9                 | 4     | 32     |
|                     |                  | % within RandomGlucose_Class | 21.9%              | 3.1%                 | 3.1%                  | 12.5%                | 18.8%                 | 28.1%             | 12.5% | 100.0% |
|                     | 1: less than 70  |                              |                    |                      |                       |                      |                       |                   |       |        |
|                     | 2: 70 - 120      |                              |                    |                      |                       |                      |                       |                   |       |        |
|                     | 3: 120 - 200     |                              |                    |                      |                       |                      |                       |                   |       |        |
|                     | 4: more than 200 |                              |                    |                      |                       |                      |                       |                   |       |        |
|                     |                  | % within Age_ Classification | 13.5%              | 5.0%                 | 6.7%                  | 5.6%                 | 5.6%                  | 3.8%              | 5.1%  | 5.5%   |
|                     |                  | % of Total                   | 1.2%               | 0.2%                 | 0.2%                  | 0.7%                 | 1.0%                  | 1.6%              | 0.7%  | 5.5%   |
|                     | 2                | Count                        | 29                 | 10                   | 10                    | 56                   | 93                    | 134               | 33    | 365    |

|       |                              |        |        |        |        |        |        |        |        |
|-------|------------------------------|--------|--------|--------|--------|--------|--------|--------|--------|
|       | % within RandomGlucose_Class | 7.9%   | 2.7%   | 2.7%   | 15.3%  | 25.5%  | 36.7%  | 9.0%   | 100.0% |
|       | 1: less than 70              |        |        |        |        |        |        |        |        |
|       | 2: 70 - 120                  |        |        |        |        |        |        |        |        |
|       | 3: 120 - 200                 |        |        |        |        |        |        |        |        |
|       | 4: more than 200             |        |        |        |        |        |        |        |        |
|       | % within Age_Classification  | 55.8%  | 50.0%  | 66.7%  | 77.8%  | 86.1%  | 57.3%  | 42.3%  | 63.0%  |
|       | % of Total                   | 5.0%   | 1.7%   | 1.7%   | 9.7%   | 16.1%  | 23.1%  | 5.7%   | 63.0%  |
| 3     | Count                        | 15     | 7      | 4      | 11     | 8      | 74     | 31     | 150    |
|       | % within RandomGlucose_Class | 10.0%  | 4.7%   | 2.7%   | 7.3%   | 5.3%   | 49.3%  | 20.7%  | 100.0% |
|       | 1: less than 70              |        |        |        |        |        |        |        |        |
|       | 2: 70 - 120                  |        |        |        |        |        |        |        |        |
|       | 3: 120 - 200                 |        |        |        |        |        |        |        |        |
|       | 4: more than 200             |        |        |        |        |        |        |        |        |
|       | % within Age_Classification  | 28.8%  | 35.0%  | 26.7%  | 15.3%  | 7.4%   | 31.6%  | 39.7%  | 25.9%  |
|       | % of Total                   | 2.6%   | 1.2%   | 0.7%   | 1.9%   | 1.4%   | 12.8%  | 5.4%   | 25.9%  |
| 4     | Count                        | 1      | 2      | 0      | 1      | 1      | 17     | 10     | 32     |
|       | % within RandomGlucose_Class | 3.1%   | 6.3%   | 0.0%   | 3.1%   | 3.1%   | 53.1%  | 31.3%  | 100.0% |
|       | 1: less than 70              |        |        |        |        |        |        |        |        |
|       | 2: 70 - 120                  |        |        |        |        |        |        |        |        |
|       | 3: 120 - 200                 |        |        |        |        |        |        |        |        |
|       | 4: more than 200             |        |        |        |        |        |        |        |        |
|       | % within Age_Classification  | 1.9%   | 10.0%  | 0.0%   | 1.4%   | 0.9%   | 7.3%   | 12.8%  | 5.5%   |
|       | % of Total                   | 0.2%   | 0.3%   | 0.0%   | 0.2%   | 0.2%   | 2.9%   | 1.7%   | 5.5%   |
| Total | Count                        | 52     | 20     | 15     | 72     | 108    | 234    | 78     | 579    |
|       | % within RandomGlucose_Class | 9.0%   | 3.5%   | 2.6%   | 12.4%  | 18.7%  | 40.4%  | 13.5%  | 100.0% |
|       | 1: less than 70              |        |        |        |        |        |        |        |        |
|       | 2: 70 - 120                  |        |        |        |        |        |        |        |        |
|       | 3: 120 - 200                 |        |        |        |        |        |        |        |        |
|       | 4: more than 200             |        |        |        |        |        |        |        |        |
|       | % within Age_Classification  | 100.0% | 100.0% | 100.0% | 100.0% | 100.0% | 100.0% | 100.0% | 100.0% |
|       | % of Total                   | 9.0%   | 3.5%   | 2.6%   | 12.4%  | 18.7%  | 40.4%  | 13.5%  | 100.0% |

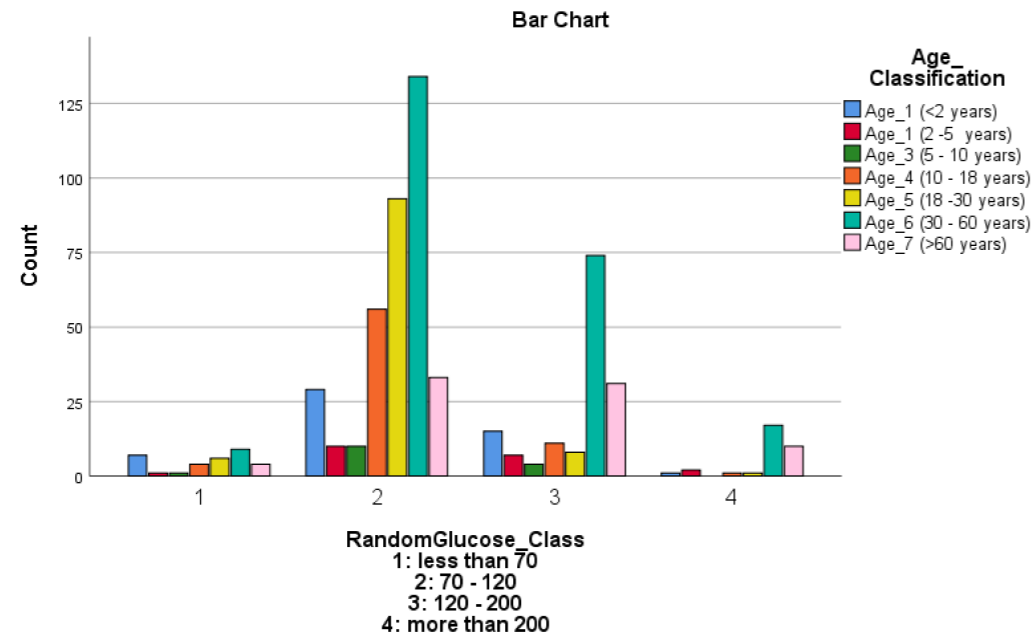

**serum potassium Classification**

**1: less than 3.5**

**2: 3.5 - 5**

**3: more than 5 \* Age\_ Classification Crosstabulation**

|                                |                  | Age_ Classification                     |                   |                    |                     |                     |                     |                   |       |        |
|--------------------------------|------------------|-----------------------------------------|-------------------|--------------------|---------------------|---------------------|---------------------|-------------------|-------|--------|
|                                |                  | Age_1 (<2 years)                        | Age_1 (2-5 years) | Age_3 (5-10 years) | Age_4 (10-18 years) | Age_5 (18-30 years) | Age_6 (30-60 years) | Age_7 (>60 years) | Total |        |
| serum potassium Classification | 1                | Count                                   | 59                | 34                 | 21                  | 23                  | 37                  | 65                | 31    | 270    |
|                                | 1: less than 3.5 | % within serum potassium Classification | 21.9%             | 12.6%              | 7.8%                | 8.5%                | 13.7%               | 24.1%             | 11.5% | 100.0% |
|                                | 2: 3.5 - 5       |                                         |                   |                    |                     |                     |                     |                   |       |        |
|                                | 3: more than 5   |                                         |                   |                    |                     |                     |                     |                   |       |        |
|                                |                  | % within Age_ Classification            | 43.4%             | 55.7%              | 40.4%               | 21.9%               | 29.8%               | 25.8%             | 35.6% | 33.0%  |
|                                | % of Total       | 7.2%                                    | 4.2%              | 2.6%               | 2.8%                | 4.5%                | 8.0%                | 3.8%              | 33.0% |        |
| 2                              | Count            | 71                                      | 25                | 31                 | 82                  | 86                  | 171                 | 50                | 516   |        |

|       |                                                                                             |        |        |        |        |        |        |        |        |
|-------|---------------------------------------------------------------------------------------------|--------|--------|--------|--------|--------|--------|--------|--------|
|       | % within serum potassium Classification<br>1: less than 3.5<br>2: 3.5 - 5<br>3: more than 5 | 13.8%  | 4.8%   | 6.0%   | 15.9%  | 16.7%  | 33.1%  | 9.7%   | 100.0% |
|       | % within Age_ Classification                                                                | 52.2%  | 41.0%  | 59.6%  | 78.1%  | 69.4%  | 67.9%  | 57.5%  | 63.2%  |
|       | % of Total                                                                                  | 8.7%   | 3.1%   | 3.8%   | 10.0%  | 10.5%  | 20.9%  | 6.1%   | 63.2%  |
| 3     | Count                                                                                       | 6      | 2      | 0      | 0      | 1      | 16     | 6      | 31     |
|       | % within serum potassium Classification<br>1: less than 3.5<br>2: 3.5 - 5<br>3: more than 5 | 19.4%  | 6.5%   | 0.0%   | 0.0%   | 3.2%   | 51.6%  | 19.4%  | 100.0% |
|       | % within Age_ Classification                                                                | 4.4%   | 3.3%   | 0.0%   | 0.0%   | 0.8%   | 6.3%   | 6.9%   | 3.8%   |
|       | % of Total                                                                                  | 0.7%   | 0.2%   | 0.0%   | 0.0%   | 0.1%   | 2.0%   | 0.7%   | 3.8%   |
| Total | Count                                                                                       | 136    | 61     | 52     | 105    | 124    | 252    | 87     | 817    |
|       | % within serum potassium Classification<br>1: less than 3.5<br>2: 3.5 - 5<br>3: more than 5 | 16.6%  | 7.5%   | 6.4%   | 12.9%  | 15.2%  | 30.8%  | 10.6%  | 100.0% |
|       | % within Age_ Classification                                                                | 100.0% | 100.0% | 100.0% | 100.0% | 100.0% | 100.0% | 100.0% | 100.0% |
|       | % of Total                                                                                  | 16.6%  | 7.5%   | 6.4%   | 12.9%  | 15.2%  | 30.8%  | 10.6%  | 100.0% |

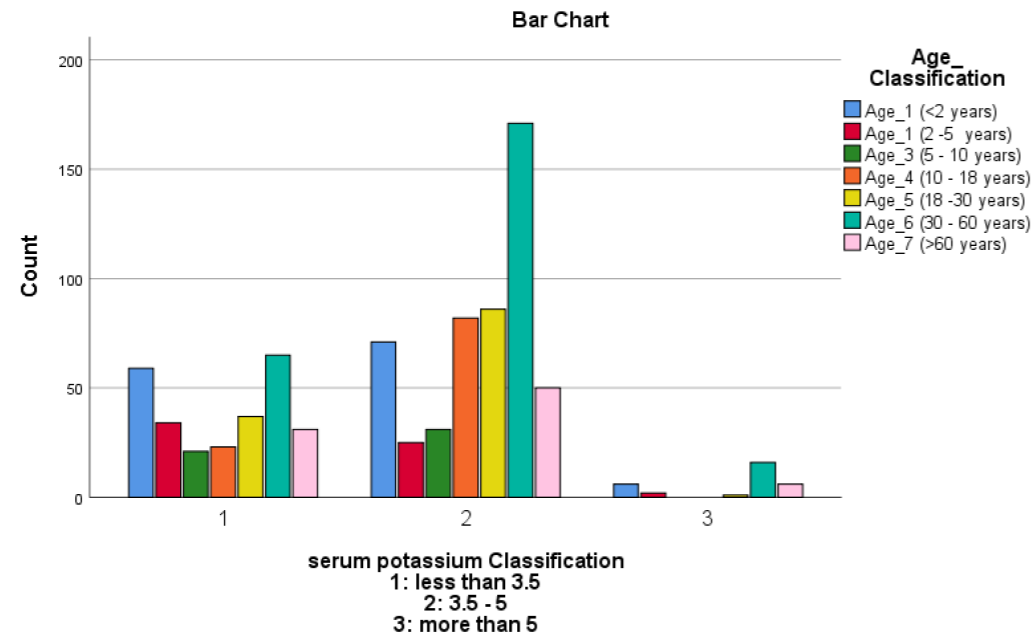

**SodiumSerum\_Class**  
1: less than 135  
2: 135 - 145  
3: more than 145 \* Age Classification Crosstabulation

|                   |                  | Age Classification          |                   |                    |                     |                     |                     |                   |       |        |
|-------------------|------------------|-----------------------------|-------------------|--------------------|---------------------|---------------------|---------------------|-------------------|-------|--------|
|                   |                  | Age_1 (<2 years)            | Age_1 (2-5 years) | Age_3 (5-10 years) | Age_4 (10-18 years) | Age_5 (18-30 years) | Age_6 (30-60 years) | Age_7 (>60 years) | Total |        |
| SodiumSerum_Class | 1                | Count                       | 76                | 32                 | 22                  | 42                  | 47                  | 98                | 35    | 352    |
|                   | 1: less than 135 | % within SodiumSerum_Class  | 21.6%             | 9.1%               | 6.3%                | 11.9%               | 13.4%               | 27.8%             | 9.9%  | 100.0% |
|                   | 2: 135 - 145     | 1: less than 135            |                   |                    |                     |                     |                     |                   |       |        |
|                   | 3: more than 145 | 2: 135 - 145                |                   |                    |                     |                     |                     |                   |       |        |
|                   |                  | 3: more than 145            |                   |                    |                     |                     |                     |                   |       |        |
|                   |                  | % within Age Classification | 56.3%             | 52.5%              | 43.1%               | 39.6%               | 37.6%               | 39.2%             | 40.7% | 43.2%  |
|                   | % of Total       | 9.3%                        | 3.9%              | 2.7%               | 5.2%                | 5.8%                | 12.0%               | 4.3%              | 43.2% |        |
| SodiumSerum_Class | 2                | Count                       | 54                | 27                 | 28                  | 62                  | 75                  | 150               | 50    | 446    |
|                   | 1: less than 135 | % within SodiumSerum_Class  | 12.1%             | 6.1%               | 6.3%                | 13.9%               | 16.8%               | 33.6%             | 11.2% | 100.0% |
|                   | 2: 135 - 145     | 1: less than 135            |                   |                    |                     |                     |                     |                   |       |        |
|                   | 3: more than 145 | 2: 135 - 145                |                   |                    |                     |                     |                     |                   |       |        |
|                   |                  | 3: more than 145            |                   |                    |                     |                     |                     |                   |       |        |



|       |                             |        |        |        |        |        |        |        |        |
|-------|-----------------------------|--------|--------|--------|--------|--------|--------|--------|--------|
|       | % within Age_Classification | 40.0%  | 44.3%  | 54.9%  | 58.5%  | 60.0%  | 60.0%  | 58.1%  | 54.8%  |
|       | % of Total                  | 6.6%   | 3.3%   | 3.4%   | 7.6%   | 9.2%   | 18.4%  | 6.1%   | 54.8%  |
| 3     | Count                       | 5      | 2      | 1      | 2      | 3      | 2      | 1      | 16     |
|       | % within SodiumSerum_Class  | 31.3%  | 12.5%  | 6.3%   | 12.5%  | 18.8%  | 12.5%  | 6.3%   | 100.0% |
|       | 1: less than 135            |        |        |        |        |        |        |        |        |
|       | 2: 135 - 145                |        |        |        |        |        |        |        |        |
|       | 3: more than 145            |        |        |        |        |        |        |        |        |
|       | % within Age_Classification | 3.7%   | 3.3%   | 2.0%   | 1.9%   | 2.4%   | 0.8%   | 1.2%   | 2.0%   |
|       | % of Total                  | 0.6%   | 0.2%   | 0.1%   | 0.2%   | 0.4%   | 0.2%   | 0.1%   | 2.0%   |
| Total | Count                       | 135    | 61     | 51     | 106    | 125    | 250    | 86     | 814    |
|       | % within SodiumSerum_Class  | 16.6%  | 7.5%   | 6.3%   | 13.0%  | 15.4%  | 30.7%  | 10.6%  | 100.0% |
|       | 1: less than 135            |        |        |        |        |        |        |        |        |
|       | 2: 135 - 145                |        |        |        |        |        |        |        |        |
|       | % within Age_Classification | 100.0% | 100.0% | 100.0% | 100.0% | 100.0% | 100.0% | 100.0% | 100.0% |
|       | % of Total                  | 16.6%  | 7.5%   | 6.3%   | 13.0%  | 15.4%  | 30.7%  | 10.6%  | 100.0% |

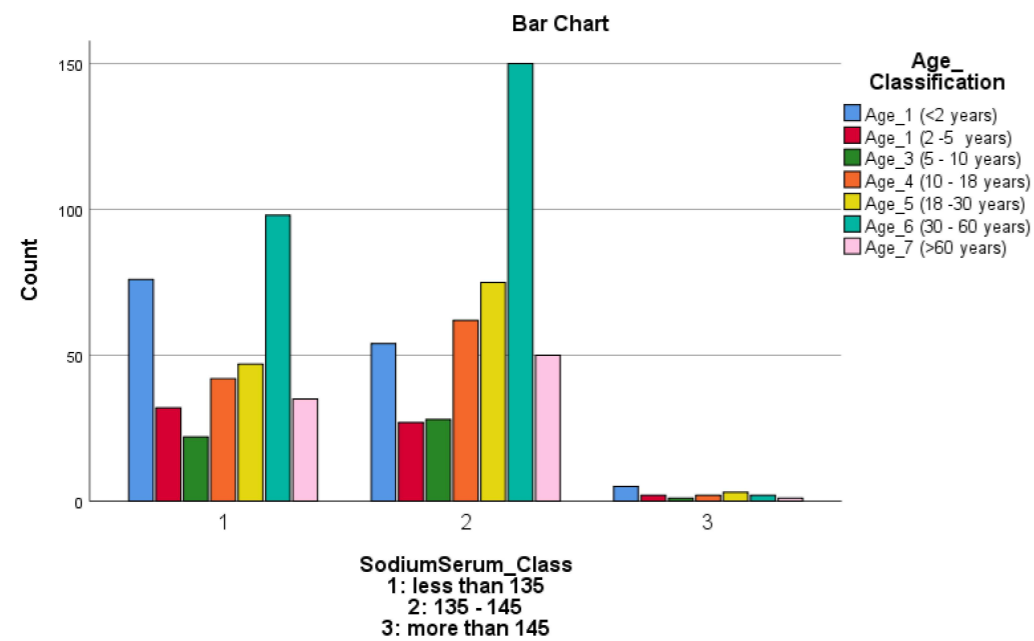

# Complications according to age Class

## any complication through staying at hospital

Yes (1)

### No (0) \* Age\_ Classification Crosstabulation

|                                                                   |                              | Age_ Classification                                   |                    |                      |                       |                      |                       |                   | Total  |        |     |
|-------------------------------------------------------------------|------------------------------|-------------------------------------------------------|--------------------|----------------------|-----------------------|----------------------|-----------------------|-------------------|--------|--------|-----|
|                                                                   |                              | Age_1 (<2 years)                                      | Age_1 (2 -5 years) | Age_3 (5 - 10 years) | Age_4 (10 - 18 years) | Age_5 (18 -30 years) | Age_6 (30 - 60 years) | Age_7 (>60 years) |        |        |     |
| any complication through staying at hospital<br>Yes (1)<br>No (0) | 0                            | Count                                                 | 111                | 51                   | 57                    | 93                   | 94                    | 163               | 40     | 609    |     |
|                                                                   |                              | % within any complication through staying at hospital | 18.2%              | 8.4%                 | 9.4%                  | 15.3%                | 15.4%                 | 26.8%             | 6.6%   | 100.0% |     |
|                                                                   |                              | % within Age_ Classification                          | 53.9%              | 51.5%                | 66.3%                 | 66.4%                | 64.4%                 | 56.4%             | 42.1%  | 57.4%  |     |
|                                                                   |                              | % of Total                                            | 10.5%              | 4.8%                 | 5.4%                  | 8.8%                 | 8.9%                  | 15.4%             | 3.8%   | 57.4%  |     |
|                                                                   |                              | 1                                                     | Count              | 95                   | 48                    | 29                   | 47                    | 52                | 126    | 55     | 452 |
|                                                                   |                              | % within any complication through staying at hospital | 21.0%              | 10.6%                | 6.4%                  | 10.4%                | 11.5%                 | 27.9%             | 12.2%  | 100.0% |     |
|                                                                   | % within Age_ Classification | 46.1%                                                 | 48.5%              | 33.7%                | 33.6%                 | 35.6%                | 43.6%                 | 57.9%             | 42.6%  |        |     |
|                                                                   | % of Total                   | 9.0%                                                  | 4.5%               | 2.7%                 | 4.4%                  | 4.9%                 | 11.9%                 | 5.2%              | 42.6%  |        |     |
| Total                                                             |                              | Count                                                 | 206                | 99                   | 86                    | 140                  | 146                   | 289               | 95     | 1061   |     |
|                                                                   |                              | % within any complication through staying at hospital | 19.4%              | 9.3%                 | 8.1%                  | 13.2%                | 13.8%                 | 27.2%             | 9.0%   | 100.0% |     |
|                                                                   |                              | % within Age_ Classification                          | 100.0%             | 100.0%               | 100.0%                | 100.0%               | 100.0%                | 100.0%            | 100.0% | 100.0% |     |
|                                                                   |                              | % of Total                                            | 19.4%              | 9.3%                 | 8.1%                  | 13.2%                | 13.8%                 | 27.2%             | 9.0%   | 100.0% |     |
|                                                                   |                              | No (0)                                                |                    |                      |                       |                      |                       |                   |        |        |     |

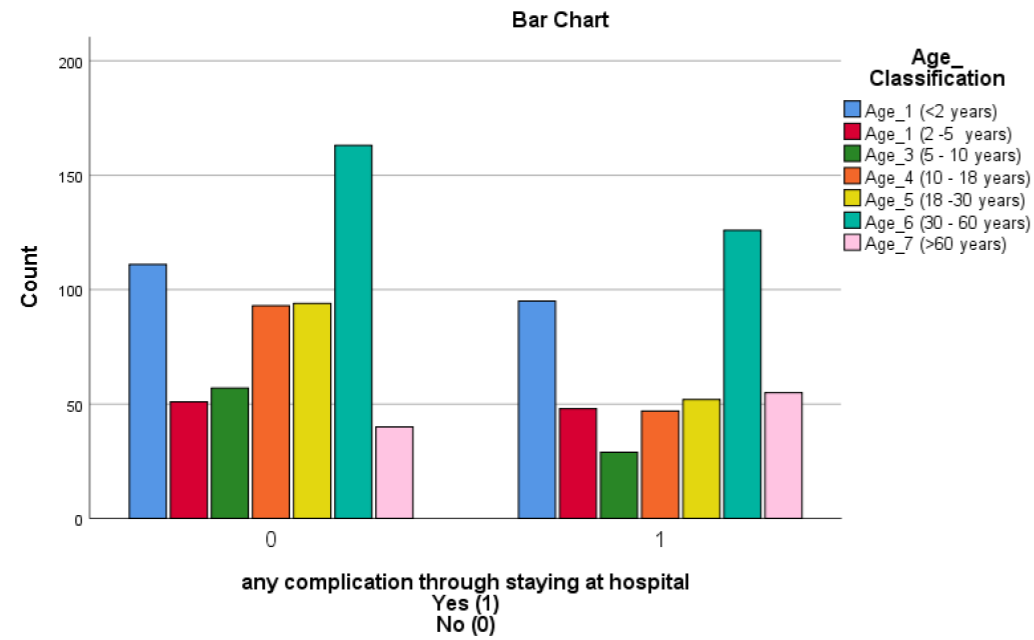

**Sever Dehydration \* Age\_ Classification Crosstabulation**

|                   |                            | Age_ Classification          |                    |                      |                       |                      |                       |                   | Total  |        |
|-------------------|----------------------------|------------------------------|--------------------|----------------------|-----------------------|----------------------|-----------------------|-------------------|--------|--------|
|                   |                            | Age_1 (<2 years)             | Age_1 (2 -5 years) | Age_3 (5 - 10 years) | Age_4 (10 - 18 years) | Age_5 (18 -30 years) | Age_6 (30 - 60 years) | Age_7 (>60 years) |        |        |
| Sever Dehydration | 0                          | Count                        | 164                | 73                   | 75                    | 124                  | 135                   | 245               | 69     | 885    |
|                   |                            | % within Sever Dehydration   | 18.5%              | 8.2%                 | 8.5%                  | 14.0%                | 15.3%                 | 27.7%             | 7.8%   | 100.0% |
|                   |                            | % within Age_ Classification | 79.6%              | 73.7%                | 87.2%                 | 88.6%                | 92.5%                 | 84.8%             | 72.6%  | 83.4%  |
|                   |                            | % of Total                   | 15.5%              | 6.9%                 | 7.1%                  | 11.7%                | 12.7%                 | 23.1%             | 6.5%   | 83.4%  |
|                   | 1                          | Count                        | 41                 | 26                   | 11                    | 15                   | 11                    | 43                | 26     | 173    |
|                   |                            | % within Sever Dehydration   | 23.7%              | 15.0%                | 6.4%                  | 8.7%                 | 6.4%                  | 24.9%             | 15.0%  | 100.0% |
|                   |                            | % within Age_ Classification | 19.9%              | 26.3%                | 12.8%                 | 10.7%                | 7.5%                  | 14.9%             | 27.4%  | 16.3%  |
|                   |                            | % of Total                   | 3.9%               | 2.5%                 | 1.0%                  | 1.4%                 | 1.0%                  | 4.1%              | 2.5%   | 16.3%  |
|                   | 4                          | Count                        | 1                  | 0                    | 0                     | 1                    | 0                     | 1                 | 0      | 3      |
|                   |                            | % within Sever Dehydration   | 33.3%              | 0.0%                 | 0.0%                  | 33.3%                | 0.0%                  | 33.3%             | 0.0%   | 100.0% |
|                   |                            | % within Age_ Classification | 0.5%               | 0.0%                 | 0.0%                  | 0.7%                 | 0.0%                  | 0.3%              | 0.0%   | 0.3%   |
|                   |                            | % of Total                   | 0.1%               | 0.0%                 | 0.0%                  | 0.1%                 | 0.0%                  | 0.1%              | 0.0%   | 0.3%   |
| Total             | Count                      | 206                          | 99                 | 86                   | 140                   | 146                  | 289                   | 95                | 1061   |        |
|                   | % within Sever Dehydration | 19.4%                        | 9.3%               | 8.1%                 | 13.2%                 | 13.8%                | 27.2%                 | 9.0%              | 100.0% |        |

|                              |        |        |        |        |        |        |        |        |
|------------------------------|--------|--------|--------|--------|--------|--------|--------|--------|
| % within Age_ Classification | 100.0% | 100.0% | 100.0% | 100.0% | 100.0% | 100.0% | 100.0% | 100.0% |
| % of Total                   | 19.4%  | 9.3%   | 8.1%   | 13.2%  | 13.8%  | 27.2%  | 9.0%   | 100.0% |

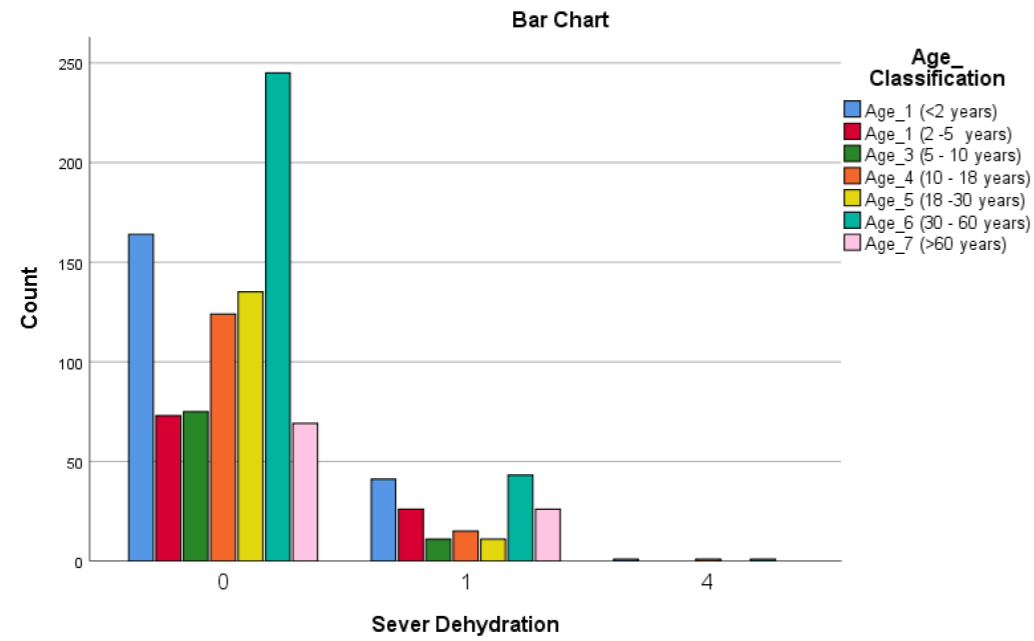

**Electrolyte Imbalance \* Age\_ Classification Crosstabulation**

|                       |                                | Age_ Classification            |                   |                    |                     |                     |                     |                   | Total  |        |
|-----------------------|--------------------------------|--------------------------------|-------------------|--------------------|---------------------|---------------------|---------------------|-------------------|--------|--------|
|                       |                                | Age_1 (<2 years)               | Age_1 (2-5 years) | Age_3 (5-10 years) | Age_4 (10-18 years) | Age_5 (18-30 years) | Age_6 (30-60 years) | Age_7 (>60 years) |        |        |
| Electrolyte Imbalance | 0                              | Count                          | 141               | 64                 | 62                  | 110                 | 107                 | 217               | 61     | 762    |
|                       |                                | % within Electrolyte Imbalance | 18.5%             | 8.4%               | 8.1%                | 14.4%               | 14.0%               | 28.5%             | 8.0%   | 100.0% |
|                       |                                | % within Age_ Classification   | 68.4%             | 64.6%              | 72.1%               | 78.6%               | 73.3%               | 75.1%             | 64.2%  | 71.8%  |
|                       |                                | % of Total                     | 13.3%             | 6.0%               | 5.8%                | 10.4%               | 10.1%               | 20.5%             | 5.7%   | 71.8%  |
| Electrolyte Imbalance | 1                              | Count                          | 65                | 35                 | 24                  | 30                  | 39                  | 72                | 34     | 299    |
|                       |                                | % within Electrolyte Imbalance | 21.7%             | 11.7%              | 8.0%                | 10.0%               | 13.0%               | 24.1%             | 11.4%  | 100.0% |
|                       |                                | % within Age_ Classification   | 31.6%             | 35.4%              | 27.9%               | 21.4%               | 26.7%               | 24.9%             | 35.8%  | 28.2%  |
|                       |                                | % of Total                     | 6.1%              | 3.3%               | 2.3%                | 2.8%                | 3.7%                | 6.8%              | 3.2%   | 28.2%  |
| Total                 | Count                          | 206                            | 99                | 86                 | 140                 | 146                 | 289                 | 95                | 1061   |        |
|                       | % within Electrolyte Imbalance | 19.4%                          | 9.3%              | 8.1%               | 13.2%               | 13.8%               | 27.2%               | 9.0%              | 100.0% |        |
|                       | % within Age_ Classification   | 100.0%                         | 100.0%            | 100.0%             | 100.0%              | 100.0%              | 100.0%              | 100.0%            | 100.0% |        |

|            |       |      |      |       |       |       |      |        |
|------------|-------|------|------|-------|-------|-------|------|--------|
| % of Total | 19.4% | 9.3% | 8.1% | 13.2% | 13.8% | 27.2% | 9.0% | 100.0% |
|------------|-------|------|------|-------|-------|-------|------|--------|

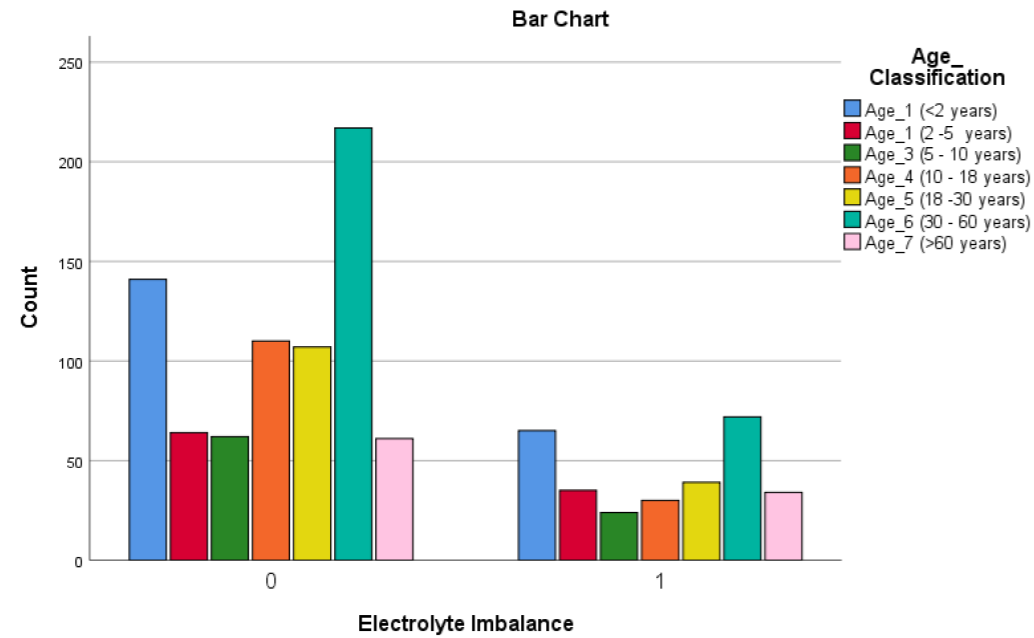

**Acute Kidney Injury \* Age\_ Classification Crosstabulation**

|                     |                              | Age_ Classification          |                   |                    |                     |                     |                     |                   |        |        |
|---------------------|------------------------------|------------------------------|-------------------|--------------------|---------------------|---------------------|---------------------|-------------------|--------|--------|
|                     |                              | Age_1 (<2 years)             | Age_1 (2-5 years) | Age_3 (5-10 years) | Age_4 (10-18 years) | Age_5 (18-30 years) | Age_6 (30-60 years) | Age_7 (>60 years) | Total  |        |
| Acute Kidney Injury | 0                            | Count                        | 199               | 95                 | 79                  | 134                 | 141                 | 251               | 57     | 956    |
|                     |                              | % within Acute Kidney Injury | 20.8%             | 9.9%               | 8.3%                | 14.0%               | 14.7%               | 26.3%             | 6.0%   | 100.0% |
|                     |                              | % within Age_ Classification | 96.6%             | 96.0%              | 91.9%               | 95.7%               | 96.6%               | 86.9%             | 60.0%  | 90.1%  |
|                     |                              | % of Total                   | 18.8%             | 9.0%               | 7.4%                | 12.6%               | 13.3%               | 23.7%             | 5.4%   | 90.1%  |
|                     | 1                            | Count                        | 7                 | 4                  | 7                   | 6                   | 5                   | 38                | 38     | 105    |
|                     |                              | % within Acute Kidney Injury | 6.7%              | 3.8%               | 6.7%                | 5.7%                | 4.8%                | 36.2%             | 36.2%  | 100.0% |
|                     |                              | % within Age_ Classification | 3.4%              | 4.0%               | 8.1%                | 4.3%                | 3.4%                | 13.1%             | 40.0%  | 9.9%   |
|                     |                              | % of Total                   | 0.7%              | 0.4%               | 0.7%                | 0.6%                | 0.5%                | 3.6%              | 3.6%   | 9.9%   |
| Total               | Count                        | 206                          | 99                | 86                 | 140                 | 146                 | 289                 | 95                | 1061   |        |
|                     | % within Acute Kidney Injury | 19.4%                        | 9.3%              | 8.1%               | 13.2%               | 13.8%               | 27.2%               | 9.0%              | 100.0% |        |
|                     | % within Age_ Classification | 100.0%                       | 100.0%            | 100.0%             | 100.0%              | 100.0%              | 100.0%              | 100.0%            | 100.0% |        |
|                     | % of Total                   | 19.4%                        | 9.3%              | 8.1%               | 13.2%               | 13.8%               | 27.2%               | 9.0%              | 100.0% |        |

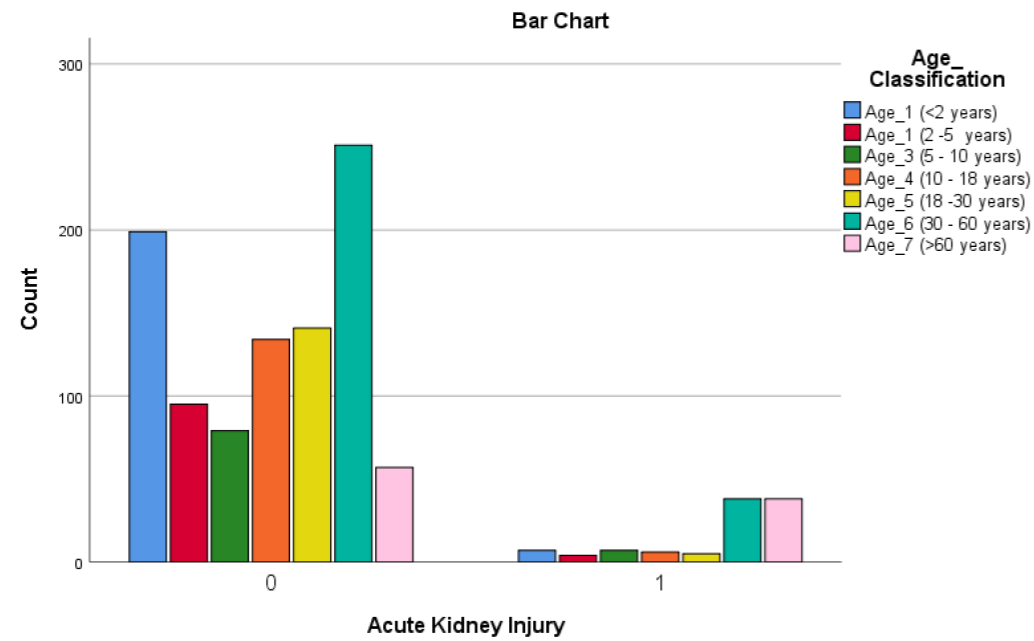

Shock \* Age\_ Classification Crosstabulation

| Shock |                              | Age_ Classification |                   |                    |                     |                     |                     |                   | Total  |
|-------|------------------------------|---------------------|-------------------|--------------------|---------------------|---------------------|---------------------|-------------------|--------|
|       |                              | Age_1 (<2 years)    | Age_1 (2-5 years) | Age_3 (5-10 years) | Age_4 (10-18 years) | Age_5 (18-30 years) | Age_6 (30-60 years) | Age_7 (>60 years) |        |
| 0     | Count                        | 200                 | 95                | 85                 | 139                 | 144                 | 283                 | 94                | 1040   |
|       | % within Shock               | 19.2%               | 9.1%              | 8.2%               | 13.4%               | 13.8%               | 27.2%               | 9.0%              | 100.0% |
|       | % within Age_ Classification | 97.1%               | 96.0%             | 98.8%              | 99.3%               | 98.6%               | 97.9%               | 98.9%             | 98.0%  |
|       | % of Total                   | 18.9%               | 9.0%              | 8.0%               | 13.1%               | 13.6%               | 26.7%               | 8.9%              | 98.0%  |
| 1     | Count                        | 6                   | 4                 | 1                  | 1                   | 2                   | 6                   | 1                 | 21     |
|       | % within Shock               | 28.6%               | 19.0%             | 4.8%               | 4.8%                | 9.5%                | 28.6%               | 4.8%              | 100.0% |
|       | % within Age_ Classification | 2.9%                | 4.0%              | 1.2%               | 0.7%                | 1.4%                | 2.1%                | 1.1%              | 2.0%   |
|       | % of Total                   | 0.6%                | 0.4%              | 0.1%               | 0.1%                | 0.2%                | 0.6%                | 0.1%              | 2.0%   |
| Total | Count                        | 206                 | 99                | 86                 | 140                 | 146                 | 289                 | 95                | 1061   |
|       | % within Shock               | 19.4%               | 9.3%              | 8.1%               | 13.2%               | 13.8%               | 27.2%               | 9.0%              | 100.0% |
|       | % within Age_ Classification | 100.0%              | 100.0%            | 100.0%             | 100.0%              | 100.0%              | 100.0%              | 100.0%            | 100.0% |
|       | % of Total                   | 19.4%               | 9.3%              | 8.1%               | 13.2%               | 13.8%               | 27.2%               | 9.0%              | 100.0% |

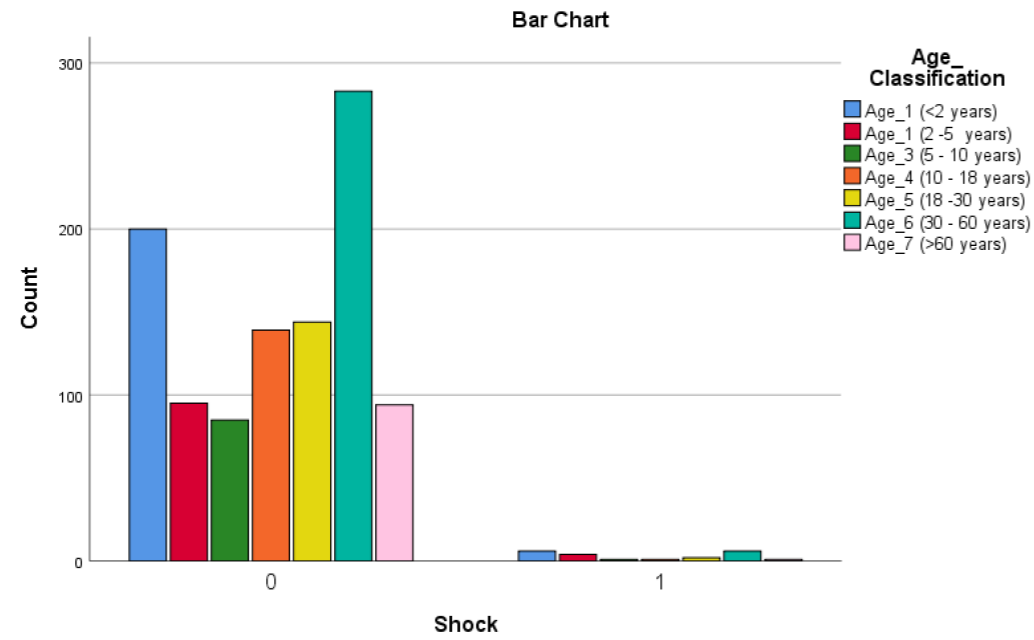

**Hypoglycemia \* Age\_ Classification Crosstabulation**

|              |                              | Age_ Classification          |                    |                      |                       |                      |                       |                   | Total  |        |
|--------------|------------------------------|------------------------------|--------------------|----------------------|-----------------------|----------------------|-----------------------|-------------------|--------|--------|
|              |                              | Age_1 (<2 years)             | Age_1 (2 -5 years) | Age_3 (5 - 10 years) | Age_4 (10 - 18 years) | Age_5 (18 -30 years) | Age_6 (30 - 60 years) | Age_7 (>60 years) |        |        |
| Hypoglycemia | 0                            | Count                        | 199                | 98                   | 85                    | 136                  | 140                   | 280               | 91     | 1029   |
|              |                              | % within Hypoglycemia        | 19.3%              | 9.5%                 | 8.3%                  | 13.2%                | 13.6%                 | 27.2%             | 8.8%   | 100.0% |
|              |                              | % within Age_ Classification | 96.6%              | 99.0%                | 98.8%                 | 97.1%                | 95.9%                 | 96.9%             | 95.8%  | 97.0%  |
|              |                              | % of Total                   | 18.8%              | 9.2%                 | 8.0%                  | 12.8%                | 13.2%                 | 26.4%             | 8.6%   | 97.0%  |
|              | 1                            | Count                        | 7                  | 1                    | 1                     | 4                    | 6                     | 9                 | 4      | 32     |
|              |                              | % within Hypoglycemia        | 21.9%              | 3.1%                 | 3.1%                  | 12.5%                | 18.8%                 | 28.1%             | 12.5%  | 100.0% |
|              |                              | % within Age_ Classification | 3.4%               | 1.0%                 | 1.2%                  | 2.9%                 | 4.1%                  | 3.1%              | 4.2%   | 3.0%   |
|              |                              | % of Total                   | 0.7%               | 0.1%                 | 0.1%                  | 0.4%                 | 0.6%                  | 0.8%              | 0.4%   | 3.0%   |
| Total        | Count                        | 206                          | 99                 | 86                   | 140                   | 146                  | 289                   | 95                | 1061   |        |
|              | % within Hypoglycemia        | 19.4%                        | 9.3%               | 8.1%                 | 13.2%                 | 13.8%                | 27.2%                 | 9.0%              | 100.0% |        |
|              | % within Age_ Classification | 100.0%                       | 100.0%             | 100.0%               | 100.0%                | 100.0%               | 100.0%                | 100.0%            | 100.0% |        |
|              | % of Total                   | 19.4%                        | 9.3%               | 8.1%                 | 13.2%                 | 13.8%                | 27.2%                 | 9.0%              | 100.0% |        |

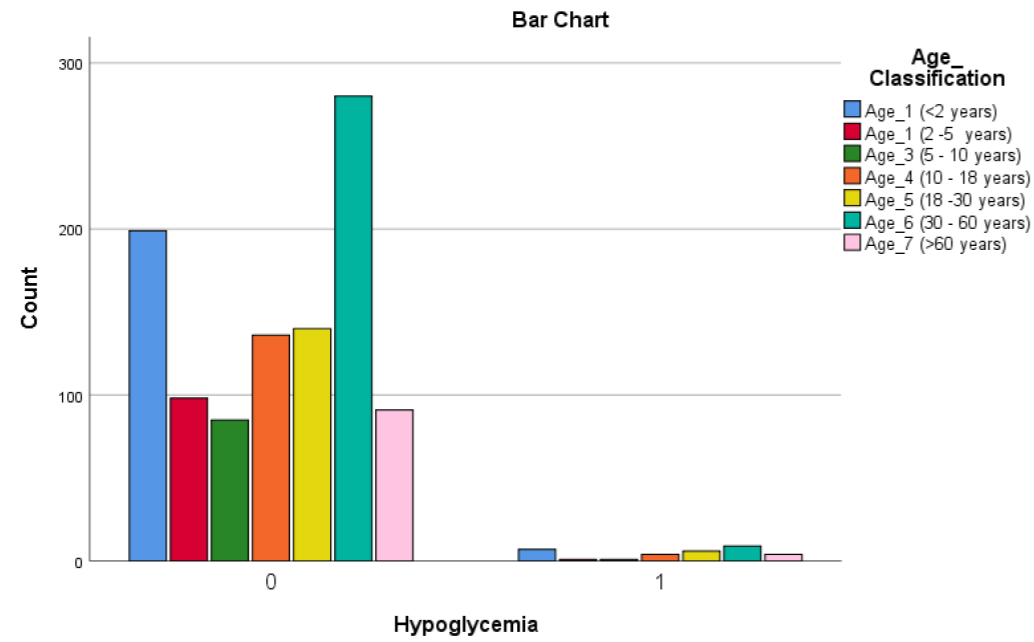

Other \* Age\_ Classification Crosstabulation

|       |   | Age_ Classification          |                   |                    |                     |                     |                     |                   | Total  |        |
|-------|---|------------------------------|-------------------|--------------------|---------------------|---------------------|---------------------|-------------------|--------|--------|
|       |   | Age_1 (<2 years)             | Age_1 (2-5 years) | Age_3 (5-10 years) | Age_4 (10-18 years) | Age_5 (18-30 years) | Age_6 (30-60 years) | Age_7 (>60 years) |        |        |
| Other | 0 | Count                        | 199               | 96                 | 86                  | 139                 | 145                 | 284               | 93     | 1042   |
|       |   | % within Other               | 19.1%             | 9.2%               | 8.3%                | 13.3%               | 13.9%               | 27.3%             | 8.9%   | 100.0% |
|       |   | % within Age_ Classification | 96.6%             | 97.0%              | 100.0%              | 99.3%               | 99.3%               | 98.3%             | 97.9%  | 98.2%  |
|       |   | % of Total                   | 18.8%             | 9.0%               | 8.1%                | 13.1%               | 13.7%               | 26.8%             | 8.8%   | 98.2%  |
| Other | 1 | Count                        | 7                 | 3                  | 0                   | 1                   | 1                   | 5                 | 2      | 19     |
|       |   | % within Other               | 36.8%             | 15.8%              | 0.0%                | 5.3%                | 5.3%                | 26.3%             | 10.5%  | 100.0% |
|       |   | % within Age_ Classification | 3.4%              | 3.0%               | 0.0%                | 0.7%                | 0.7%                | 1.7%              | 2.1%   | 1.8%   |
|       |   | % of Total                   | 0.7%              | 0.3%               | 0.0%                | 0.1%                | 0.1%                | 0.5%              | 0.2%   | 1.8%   |
| Total |   | Count                        | 206               | 99                 | 86                  | 140                 | 146                 | 289               | 95     | 1061   |
|       |   | % within Other               | 19.4%             | 9.3%               | 8.1%                | 13.2%               | 13.8%               | 27.2%             | 9.0%   | 100.0% |
|       |   | % within Age_ Classification | 100.0%            | 100.0%             | 100.0%              | 100.0%              | 100.0%              | 100.0%            | 100.0% | 100.0% |
|       |   | % of Total                   | 19.4%             | 9.3%               | 8.1%                | 13.2%               | 13.8%               | 27.2%             | 9.0%   | 100.0% |



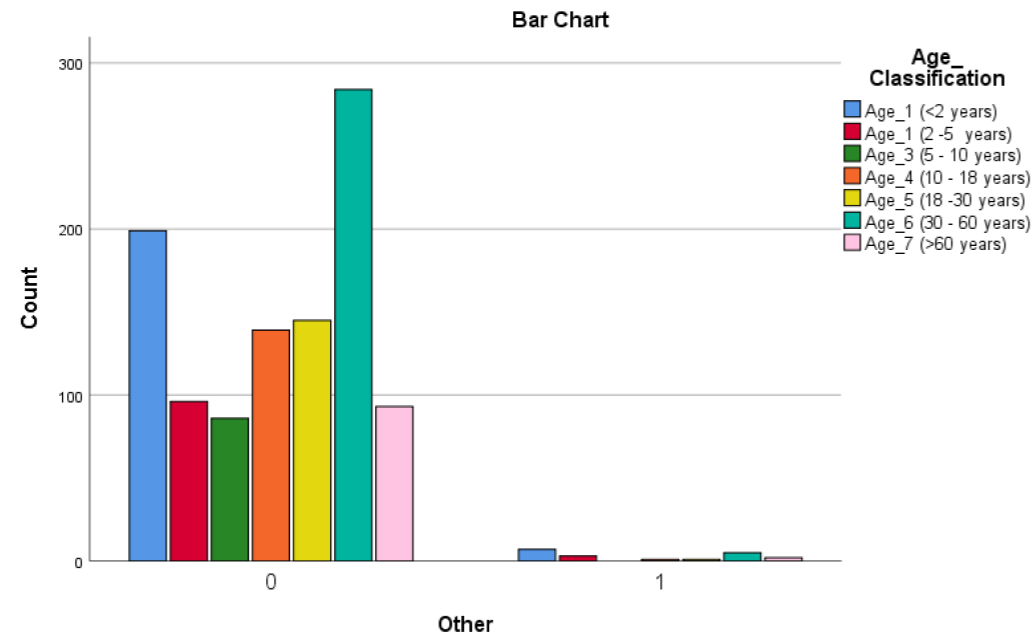

Patient Health at discharge \* Age\_ Classification Crosstabulation

|                             |      | Age_ Classification                  |                    |                      |                       |                      |                       |                   | Total |        |
|-----------------------------|------|--------------------------------------|--------------------|----------------------|-----------------------|----------------------|-----------------------|-------------------|-------|--------|
|                             |      | Age_1 (<2 years)                     | Age_1 (2 -5 years) | Age_3 (5 - 10 years) | Age_4 (10 - 18 years) | Age_5 (18 -30 years) | Age_6 (30 - 60 years) | Age_7 (>60 years) |       |        |
| Patient Health at discharge | Bad  | Count                                | 4                  | 0                    | 1                     | 2                    | 2                     | 8                 | 7     | 24     |
|                             |      | % within Patient Health at discharge | 16.7%              | 0.0%                 | 4.2%                  | 8.3%                 | 8.3%                  | 33.3%             | 29.2% | 100.0% |
|                             |      | % within Age_ Classification         | 1.9%               | 0.0%                 | 1.2%                  | 1.4%                 | 1.4%                  | 2.8%              | 7.4%  | 2.3%   |
|                             |      | % of Total                           | 0.4%               | 0.0%                 | 0.1%                  | 0.2%                 | 0.2%                  | 0.8%              | 0.7%  | 2.3%   |
|                             | Die  | Count                                | 1                  | 2                    | 0                     | 0                    | 0                     | 0                 | 1     | 4      |
|                             |      | % within Patient Health at discharge | 25.0%              | 50.0%                | 0.0%                  | 0.0%                 | 0.0%                  | 0.0%              | 25.0% | 100.0% |
|                             |      | % within Age_ Classification         | 0.5%               | 2.0%                 | 0.0%                  | 0.0%                 | 0.0%                  | 0.0%              | 1.1%  | 0.4%   |
|                             |      | % of Total                           | 0.1%               | 0.2%                 | 0.0%                  | 0.0%                 | 0.0%                  | 0.0%              | 0.1%  | 0.4%   |
|                             | Good | Count                                | 181                | 88                   | 77                    | 115                  | 110                   | 210               | 65    | 846    |
|                             |      | % within Patient Health at discharge | 21.4%              | 10.4%                | 9.1%                  | 13.6%                | 13.0%                 | 24.8%             | 7.7%  | 100.0% |
|                             |      | % within Age_ Classification         | 87.9%              | 88.9%                | 89.5%                 | 82.1%                | 75.3%                 | 72.7%             | 68.4% | 79.7%  |
|                             |      | % of Total                           | 17.1%              | 8.3%                 | 7.3%                  | 10.8%                | 10.4%                 | 19.8%             | 6.1%  | 79.7%  |

|          |                                      |        |        |        |        |        |        |        |        |
|----------|--------------------------------------|--------|--------|--------|--------|--------|--------|--------|--------|
| Moderate | Count                                | 20     | 9      | 8      | 23     | 34     | 71     | 22     | 187    |
|          | % within Patient Health at discharge | 10.7%  | 4.8%   | 4.3%   | 12.3%  | 18.2%  | 38.0%  | 11.8%  | 100.0% |
|          | % within Age_ Classification         | 9.7%   | 9.1%   | 9.3%   | 16.4%  | 23.3%  | 24.6%  | 23.2%  | 17.6%  |
|          | % of Total                           | 1.9%   | 0.8%   | 0.8%   | 2.2%   | 3.2%   | 6.7%   | 2.1%   | 17.6%  |
| Total    | Count                                | 206    | 99     | 86     | 140    | 146    | 289    | 95     | 1061   |
|          | % within Patient Health at discharge | 19.4%  | 9.3%   | 8.1%   | 13.2%  | 13.8%  | 27.2%  | 9.0%   | 100.0% |
|          | % within Age_ Classification         | 100.0% | 100.0% | 100.0% | 100.0% | 100.0% | 100.0% | 100.0% | 100.0% |
|          | % of Total                           | 19.4%  | 9.3%   | 8.1%   | 13.2%  | 13.8%  | 27.2%  | 9.0%   | 100.0% |

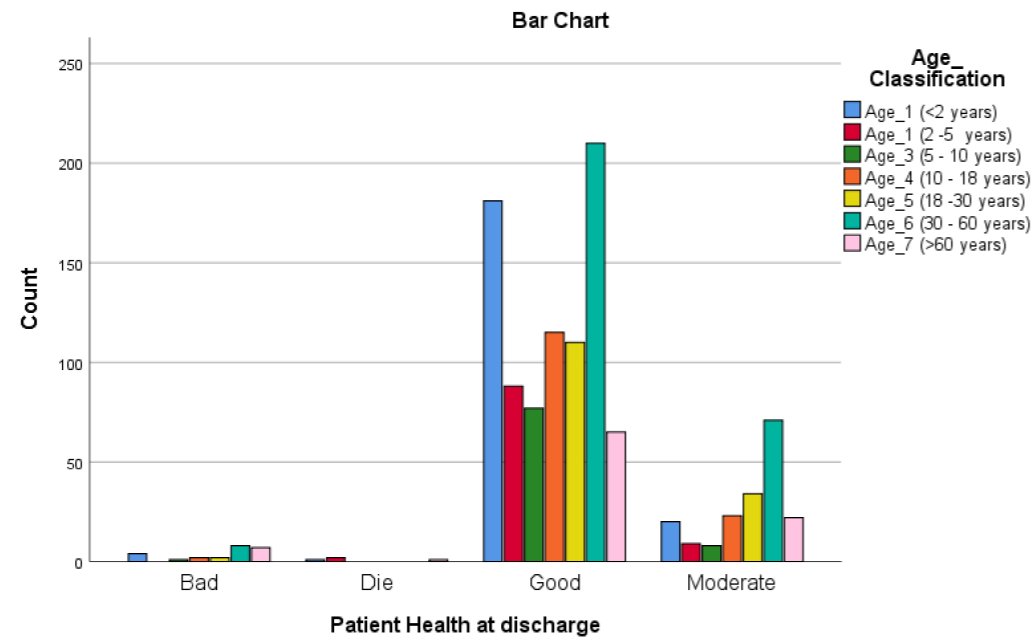

Patient Health after two weeks - one month from the admission \* Age\_ Classification Crosstabulation

|                                                   |                                                            | Age_ Classification |                   |                    |                     |                     |                     | Total             |        |
|---------------------------------------------------|------------------------------------------------------------|---------------------|-------------------|--------------------|---------------------|---------------------|---------------------|-------------------|--------|
|                                                   |                                                            | Age_1 (<2 years)    | Age_1 (2-5 years) | Age_3 (5-10 years) | Age_4 (10-18 years) | Age_5 (18-30 years) | Age_6 (30-60 years) | Age_7 (>60 years) | Total  |
| Patient Health after two weeks from the admission | Count                                                      | 0                   | 2                 | 0                  | 0                   | 0                   | 0                   | 0                 | 2      |
|                                                   | % within Patient Health after two weeks from the admission | 0.0%                | 100.0%            | 0.0%               | 0.0%                | 0.0%                | 0.0%                | 0.0%              | 100.0% |

|          |                                                            |        |        |        |        |        |        |        |        |
|----------|------------------------------------------------------------|--------|--------|--------|--------|--------|--------|--------|--------|
|          | % within Age_ Classification                               | 0.0%   | 2.0%   | 0.0%   | 0.0%   | 0.0%   | 0.0%   | 0.0%   | 0.2%   |
|          | % of Total                                                 | 0.0%   | 0.2%   | 0.0%   | 0.0%   | 0.0%   | 0.0%   | 0.0%   | 0.2%   |
| Bad      | Count                                                      | 5      | 1      | 2      | 3      | 0      | 17     | 8      | 36     |
|          | % within Patient Health after two weeks from the admission | 13.9%  | 2.8%   | 5.6%   | 8.3%   | 0.0%   | 47.2%  | 22.2%  | 100.0% |
|          | % within Age_ Classification                               | 2.4%   | 1.0%   | 2.3%   | 2.1%   | 0.0%   | 5.9%   | 8.4%   | 3.4%   |
|          | % of Total                                                 | 0.5%   | 0.1%   | 0.2%   | 0.3%   | 0.0%   | 1.6%   | 0.8%   | 3.4%   |
| Die      | Count                                                      | 3      | 2      | 0      | 0      | 0      | 1      | 4      | 10     |
|          | % within Patient Health after two weeks from the admission | 30.0%  | 20.0%  | 0.0%   | 0.0%   | 0.0%   | 10.0%  | 40.0%  | 100.0% |
|          | % within Age_ Classification                               | 1.5%   | 2.0%   | 0.0%   | 0.0%   | 0.0%   | 0.3%   | 4.2%   | 0.9%   |
|          | % of Total                                                 | 0.3%   | 0.2%   | 0.0%   | 0.0%   | 0.0%   | 0.1%   | 0.4%   | 0.9%   |
| Good     | Count                                                      | 169    | 88     | 74     | 112    | 119    | 230    | 66     | 858    |
|          | % within Patient Health after two weeks from the admission | 19.7%  | 10.3%  | 8.6%   | 13.1%  | 13.9%  | 26.8%  | 7.7%   | 100.0% |
|          | % within Age_ Classification                               | 82.0%  | 88.9%  | 86.0%  | 80.0%  | 81.5%  | 79.6%  | 69.5%  | 80.9%  |
|          | % of Total                                                 | 15.9%  | 8.3%   | 7.0%   | 10.6%  | 11.2%  | 21.7%  | 6.2%   | 80.9%  |
| Moderate | Count                                                      | 29     | 6      | 10     | 25     | 27     | 41     | 17     | 155    |
|          | % within Patient Health after two weeks from the admission | 18.7%  | 3.9%   | 6.5%   | 16.1%  | 17.4%  | 26.5%  | 11.0%  | 100.0% |
|          | % within Age_ Classification                               | 14.1%  | 6.1%   | 11.6%  | 17.9%  | 18.5%  | 14.2%  | 17.9%  | 14.6%  |
|          | % of Total                                                 | 2.7%   | 0.6%   | 0.9%   | 2.4%   | 2.5%   | 3.9%   | 1.6%   | 14.6%  |
| Total    | Count                                                      | 206    | 99     | 86     | 140    | 146    | 289    | 95     | 1061   |
|          | % within Patient Health after two weeks from the admission | 19.4%  | 9.3%   | 8.1%   | 13.2%  | 13.8%  | 27.2%  | 9.0%   | 100.0% |
|          | % within Age_ Classification                               | 100.0% | 100.0% | 100.0% | 100.0% | 100.0% | 100.0% | 100.0% | 100.0% |
|          | % of Total                                                 | 19.4%  | 9.3%   | 8.1%   | 13.2%  | 13.8%  | 27.2%  | 9.0%   | 100.0% |

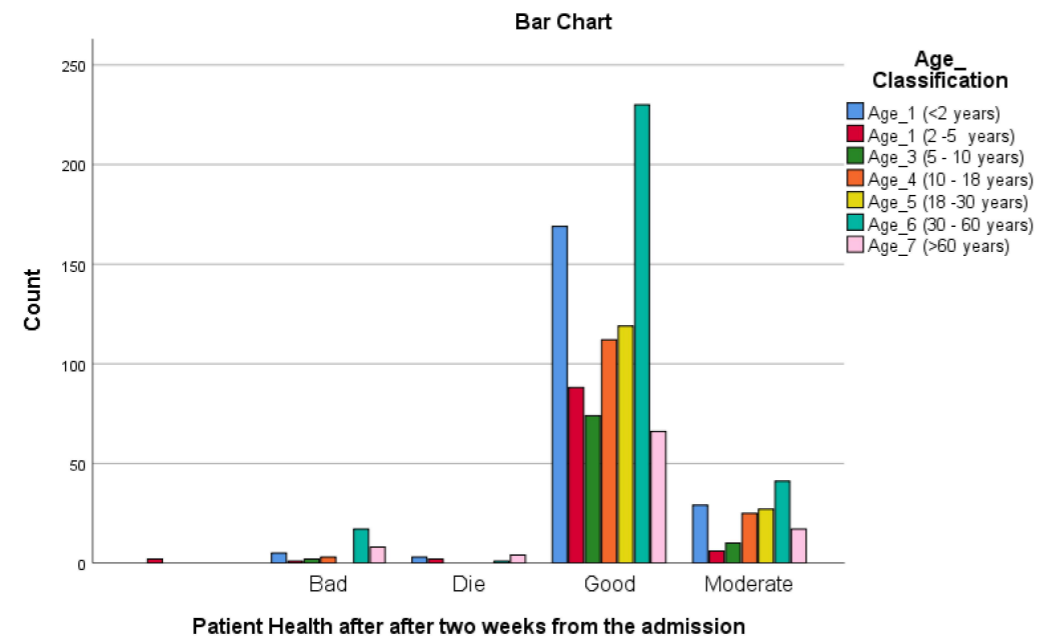

Supplement: bmjopen-2023-082385supp002.pdf [file bmjopen-2023-082385supp002.pdf]
