# Supplementary material for: Acute watery diarrhoea cases during cholera outbreak in Syria: a cohort study
Source: PubMed Central journal article supplement — BMJ Open. 2024 May 3;14(5):e082385. doi: 10.1136/bmjopen-2023-082385 (PMC11086290; doi:10.1136/bmjopen-2023-082385), 2024-05-03
Supplement: bmjopen-2023-082385.draft_revisions.pdf [file bmjopen-2023-082385.draft_revisions.pdf]

# BMJ Open

BMJ Open is committed to open peer review. As part of this commitment we make the peer review history of every article we publish publicly available.

When an article is published we post the peer reviewers' comments and the authors' responses online. We also post the versions of the paper that were used during peer review. These are the versions that the peer review comments apply to.

The versions of the paper that follow are the versions that were submitted during the peer review process. They are not the versions of record or the final published versions. They should not be cited or distributed as the published version of this manuscript.

BMJ Open is an open access journal and the full, final, typeset and author-corrected version of record of the manuscript is available on our site with no access controls, subscription charges or pay-per-view fees (<http://bmjopen.bmj.com>).

If you have any questions on BMJ Open's open peer review process please email [info.bmjopen@bmj.com](mailto:info.bmjopen@bmj.com)

# BMJ Open

## Acute Watery Diarrhea Cases During Cholera Outbreak in Syria: A Cohort Study

|                               |                                                                                                                                                                                                                                                                                                                                                                                                                                                                                                                                                                                                                                                                                                                 |
|-------------------------------|-----------------------------------------------------------------------------------------------------------------------------------------------------------------------------------------------------------------------------------------------------------------------------------------------------------------------------------------------------------------------------------------------------------------------------------------------------------------------------------------------------------------------------------------------------------------------------------------------------------------------------------------------------------------------------------------------------------------|
| Journal:                      | <i>BMJ Open</i>                                                                                                                                                                                                                                                                                                                                                                                                                                                                                                                                                                                                                                                                                                 |
| Manuscript ID                 | bmjopen-2023-082385                                                                                                                                                                                                                                                                                                                                                                                                                                                                                                                                                                                                                                                                                             |
| Article Type:                 | Original research                                                                                                                                                                                                                                                                                                                                                                                                                                                                                                                                                                                                                                                                                               |
| Date Submitted by the Author: | 21-Nov-2023                                                                                                                                                                                                                                                                                                                                                                                                                                                                                                                                                                                                                                                                                                     |
| Complete List of Authors:     | <p>Arnaout, Ahmad; University of Aleppo<br/> Nerabani, Yaman; University of Aleppo Faculty of Medicine<br/> Sawas, Mohamad Nabhan; University of Aleppo<br/> Alhejazi, Tala; University of Aleppo<br/> Farho, M. Ali; University of Aleppo<br/> Arnaout, Khaled; University of Aleppo<br/> Alshaker, Hassan; University of Aleppo<br/> Shebli, Baraa; University of Aleppo Faculty of Medicine<br/> Helou, Mostafa; University of Aleppo Faculty of Medicine<br/> Mobaied, Bashir Badawi; University of Aleppo Faculty of Medicine<br/> Mouti, Mohamad Bassel; University of Aleppo<br/> Kady, Fares; University of Aleppo Faculty of Medicine<br/> Aljarad, Ziad; University of Aleppo Faculty of Medicine</p> |
| Keywords:                     | GASTROENTEROLOGY, INFECTIOUS DISEASES, Gastrointestinal infections < GASTROENTEROLOGY, Public health < INFECTIOUS DISEASES                                                                                                                                                                                                                                                                                                                                                                                                                                                                                                                                                                                      |
|                               |                                                                                                                                                                                                                                                                                                                                                                                                                                                                                                                                                                                                                                                                                                                 |

SCHOLARONE™  
Manuscripts

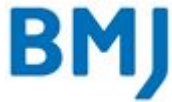

I, the Submitting Author has the right to grant and does grant on behalf of all authors of the Work (as defined in the below author licence), an exclusive licence and/or a non-exclusive licence for contributions from authors who are: i) UK Crown employees; ii) where BMJ has agreed a CC-BY licence shall apply, and/or iii) in accordance with the terms applicable for US Federal Government officers or employees acting as part of their official duties; on a worldwide, perpetual, irrevocable, royalty-free basis to BMJ Publishing Group Ltd ("BMJ") its licensees and where the relevant Journal is co-owned by BMJ to the co-owners of the Journal, to publish the Work in this journal and any other BMJ products and to exploit all rights, as set out in our [licence](#).

The Submitting Author accepts and understands that any supply made under these terms is made by BMJ to the Submitting Author unless you are acting as an employee on behalf of your employer or a postgraduate student of an affiliated institution which is paying any applicable article publishing charge ("APC") for Open Access articles. Where the Submitting Author wishes to make the Work available on an Open Access basis (and intends to pay the relevant APC), the terms of reuse of such Open Access shall be governed by a Creative Commons licence – details of these licences and which [Creative Commons](#) licence will apply to this Work are set out in our licence referred to above.

Other than as permitted in any relevant BMJ Author's Self Archiving Policies, I confirm this Work has not been accepted for publication elsewhere, is not being considered for publication elsewhere and does not duplicate material already published. I confirm all authors consent to publication of this Work and authorise the granting of this licence.

# Acute Watery Diarrhea Cases During Cholera Outbreak in Syria: A Cohort Study

Ahmad Yamen Arnaout<sup>1\*</sup>, Yaman Nerabani<sup>1</sup>, Mohamad Nabhan Sawas<sup>1</sup>, Tala Jouma Alhejazi<sup>1</sup>, Mohamad Ali Farho<sup>1</sup>, Khaled Arnaout<sup>1</sup>, Hassan Alshaker<sup>2</sup>, Baraa Shebli<sup>3</sup>, Mostafa Helou<sup>4</sup>, Bashir Badawi Mobaied<sup>5</sup>, Mohamad Bassel Mouti<sup>6</sup>, Fares Kady<sup>7</sup>, Ziad Aljarad<sup>5</sup>, Aleppo University Hospital Team\*\*

<sup>1</sup> MD, Faculty of Medicine, University of Aleppo, Aleppo, Syrian Arab Republic.

<sup>2</sup> Division of infectious Diseases, Brigham and Women's Hospital, Harvard Medical School, Boston, MA, USA.

<sup>3</sup> MD, Cardiology Department, Internal Medicine, Aleppo University Hospital, Aleppo, Syrian Arab Republic.

<sup>4</sup> MD, Internal Medicine, Aleppo University Hospital, Aleppo, Syrian Arab Republic.

<sup>5</sup> MD, MSc, Ph.D. gastroenterologist, University of Aleppo, Aleppo, Syrian Arab Republic.

<sup>6</sup> MD, MSc, Ph.D. Pediatric Department, Aleppo University Hospital, Aleppo, Syrian Arab Republic.

<sup>7</sup> MD, MPH, MSc, Ph.D. Public Health Specialist

\*: Corresponding Author: [yamen.arnout@gmail.com](mailto:yamen.arnout@gmail.com), (Open Researcher and Contributor ID, 0000-0002-1254-6647)

\*\* : Aleppo University Hospital Team: Co-authors participated in collecting data.

## 33 Abstract

34 **Objectives:** The aim of this study is a descriptive presentation of cases of acute watery diarrhea  
35 (AWD) that were presented to Aleppo University Hospital during the recent cholera outbreak in Syria.

36 **Design:** Prospective, observational, cohort, study.

37 **Setting and Participants:** A total of 1061 AWD patients were admitted to Aleppo University  
38 Hospital during the timeframe of September 20th, 2022, to October 20th, 2022, with a notable gender  
39 distribution showcasing 46.5% as males. The majority were in the middle-age category (30-60 years)  
40 and early childhood (<2 years). The data collection was done through a structured questionnaire. This  
41 includes comprehensive clinical observation, laboratory analyses, therapeutic interventions, and  
42 holistic case evaluations

43 **Results:** The analysis has revealed notable insights; A predominant proportion of patients (58.6%)  
44 were residents from urban areas, and (40.3%) were residents from rural areas. Intriguingly, a diverse  
45 range of potential infection sources emerged from patient data within our hospital, including  
46 uncontrolled well water, vegetables (notably parsley and mint, which might have irrigated with  
47 contaminated water), and fecal-oral transmission through contaminated street/fast food, particularly  
48 those integrated vegetables. Intravenous rehydration was necessitated for a substantial majority  
49 (77.7%) of patients, with Lactated Ringer and Isotonic sodium chloride solutions being administered  
50 to 33.4% and 23.6% of patients, respectively. Furthermore, 65.7% of patients received oral  
51 rehydration salts (ORS). Regarding antibiotics, Doxycycline and Ciprofloxacin were prescribed in  
52 most cases (61%). 79.8% of patients were discharged in a state of good health, although post-  
53 discharge follow-up revealed maintenance of health in only 61.9% of cases. Regrettably, four patients  
54 died (0.4%).

55 **Conclusions:** This study reached descriptive results similar to studies in previous AWD outbreaks in  
56 developing countries such as Yemen, Nigeria, and Lebanon. Therefore, future studies must investigate  
57 the risk factors that increase the spread and the severity of the disease and investigate the best  
58 management method.

## 59 Strengths and limitations

- This study conducted at Aleppo University Hospital in Syria provides a comprehensive analysis of AWD cases following the declaration of a cholera outbreak.
- The research, which was non-interventional and based solely on observation, included all patients with AWD, regardless of age or whether they were admitted to the hospital or discharged on the same day.
- The study offers detailed management and clinical assessment data, as well as a two-week post-discharge follow-up.
- As the key medical institution in the city where the first cholera case was identified, this research stands as a crucial resource for understanding and addressing the ongoing outbreak.

## 1. Introduction

Acute Watery Diarrhea (AWD) is a condition that lasts less than 14 days due to an enterotoxigenic bacteria or viral infection in the gastrointestinal system. The bacterial causes of AWD are many, including *Vibrio cholera*, *Shigella*, *Salmonella*, *E Coli*, or *Campylobacter* infection.

Usually, AWD outbreaks are critical challenges to all healthcare systems because of the rapid manifestation and idiopathic source of infection. Besides, most reported cases are distributed in areas where numerous potential sources of infection are found, such as unclean drinking water, insufficiency of water filtration infrastructures, animal exposure, and sewage-contaminated food and drinks. Moreover, these outbreaks differ between countries, depending on healthcare systems and response to emergencies, sanitation of food and water facilities, and population awareness of common infectious diseases. Notably, many countries that used to have low rates of AWD have recently been outbreak locations with new high records. Nearly 70,106 AWD reported cases in only three MENA (Middle East and North Africa) countries so far, according to the WHO's latest December 2022 reports.<sup>1-3</sup>

One of the most suspected and proven causes of AWD cases is Cholera: a waterborne intestinal infection that transmits through the fecal-oral route. To date, cholera remains a global health threat with high morbidity and mortality. Although cholera is easy to treat, delaying rehydration can make it a serious and life-threatening disease as it can cause volume depletion within a few hours. While many countries in the developed world have succeeded in completely eradicating cholera decades ago, cholera still has occasional outbreaks in low- and middle-income countries from time to time. In late 2022, Cholera caused many outbreaks in the Eastern Mediterranean region. Iraq, for instance, confirmed 3,063 cholera cases and 19 deaths, while Lebanon announced 5,372 confirmed and suspected cholera cases with 23 deaths.<sup>1,2</sup> Unfortunately, after nearly 20 years since the last cholera outbreak in Syria, cholera also returned in late 2022 to spread widely in the country, posing a challenge to the health system in the Syrian Arab Republic.<sup>3</sup>

By 10 December 2022 Syria reported 61,671 suspected and confirmed cholera cases, besides 100 deaths among its 14 governorates until 10 December. It all started on 10 September 2022, when the Ministry of Health (MoH) declared a cholera outbreak in Aleppo Governorate. After that date, other governorates enhanced the reporting of AWD cases / cholera-suspected cases, and the numbers of most affected were as follows; 20,103 in Deir Ez-Zor, 14,142 in Idleb, 12,818 in Raqqa, and 11,617 in Aleppo, according to the WHO and the Syrian MoH reports. The reports also stated a case fatality rate of 0.2% and an overall cholera positivity of 46%.<sup>3</sup>

In response, the relevant health authorities, implemented a series of procedures to control the outbreak, including enhancing the surveillance, AWD reporting, Lab support, case management refreshment,

1  
2  
3 113 providing hydration kits, and setting oral rehydration points. on the other hand, monitoring water quality  
4 114 and ensuring a safe chlorination rates at water pumping stations and at end user water point to ensured  
5 115 safer water access. Rigorous validation of food and well water sources, particularly in high-incidence  
6 116 areas, contributed to source control. Community awareness initiatives were undertaken to promote  
7 117 prevention and encourage reporting of potential cases.

8  
9  
10 118 This study aims to report AWD cases in Aleppo University Hospital (AUH), Aleppo Governorate,  
11 119 during the outbreak -between 20 September and 20 October- and assess the response quality and  
12 120 outcomes in patients and the hospital healthcare system within 30-days of reporting the cases.

## 14 121 **2. Methods**

### 15 122 **2.1. Study design and Participants**

16 123 AWD cases study in Syria is a localized, longitudinal study involving people of all ages. We conducted  
17 124 This prospective cohort profile study to enhance our understanding of AWD and to collect a voluminous  
18 125 and superior-quality dataset concerning the condition. Patients were admitted to Aleppo university  
19 126 hospital between 20th September 2022 and 20th October 2022. The process was initiated following a  
20 127 request for verbal informed consent by physicians prior to the administration of the questionnaire, and  
21 128 in accordance to Strengthening the reporting of observational studies in epidemiology (STROBE)  
22 129 statement.<sup>4</sup>

### 23 130 **2.2. Ethical approval**

24 131 The study was approved by the Aleppo university hospital. The data used in this study were completely  
25 132 anonymized before the authors had access to them. Moreover, this study was performed in accordance  
26 133 with the ethical standards as laid down in the 1964 Declaration of Helsinki and its later amendments,  
27 134 and under ethical approval from the ethics committee at the Faculty of Medicine, University of Aleppo,  
28 135 Syria.

### 29 136 **2.3. Bias**

30 137 The dean of the faculty of medicine, the head of the Department of Internal Medicine, the head of the  
31 138 Department of Pediatric Medicine, and the general director of Aleppo University Hospital Performed  
32 139 the overall review and validation of the project. The medical staff also participated in the research work.  
33 140 Investigators performed fieldwork; interviewers (in charge of the interview and filling out the data) and  
34 141 doctors (responsible for health assessment). We spare no effort to ensure that all data was registered  
35 142 accurately.

### 36 143 **2.4. Data collection and Variables**

37 144 The patients were interviewed through a structured questionnaire to gather the patients' characteristics,  
38 145 including demographics (i.e., age, gender, place of residence), admission details (e.g., dehydration and  
39 146 loss of fluid, stool description.), comorbidities, and previous medications.

40 147 Clinical examination and patients' history data were also recorded, such as measuring blood pressure  
41 148 and heart rate and taking clinical symptoms such as diarrhea, nausea and vomiting, fever, and others.  
42 149 Moreover, we recorded cholera details, including diagnosis, laboratory findings, rehydration,  
43 150 management, and follow-up.

44 151 The questionnaire was designed according to the international standards. All laboratory analyses were  
45 152 conducted by the central laboratory at Aleppo university hospital, such as count blood cells, and Blood  
46 153 biochemistry (Blood glucose, Serum creatinine, Urea, k+, Na+).

47 154 The Patients were also categorized into five grades based on their health status using the American  
48 155 Society of Anaesthesiologists physical status classification<sup>5</sup>. Habits, including smoking and alcohol

156 consumption, were evaluated using WHO's Smoking and Tobacco Use Policy which classifies patients  
157 into four categories: A daily smoker, who smokes any tobacco product at least once a day, an occasional  
158 smoker, who smokes, but not every day, a former smoker and a never smoker.<sup>6</sup>

159 The age of the patients was divided into several age groups.

160 The patients were evaluated, and their data was recorded during the hospital stay and two weeks after  
161 their discharge, and if their condition did not improve after two weeks, they were followed up for 30  
162 days.

163 The patients were evaluated at discharge and two weeks later and classified into several health  
164 categories: Good health: the patient no longer has any symptoms or mild symptoms from the  
165 convalescent stage. Moderate Health: the patient is still suffering from the symptoms of the disease but  
166 without any serious complications or organ damage. Poor health: the patient suffers from complications  
167 of the disease and his condition is poor and has never improved. And the patient passed away.  
168 Complications of AWD were recorded and the severity of dehydration was assessed.

169 Patient Data Collection Form is shown in **Supplementary File A**.

## 170 **2.5. Patient and public involvement**

171 The patients did not participate in the questionnaire design, biological measurements, or outcome  
172 measures; neither did they participate in the design, recruitment, and conducting of the study.  
173 Furthermore, all patients or their families were informed about the use of the data for research purposes  
174 in this study.

## 175 **2.6. Statistical methods**

176 Patient data extracts were entered into an Excel database and analyzed using the SPSS PC version 24.0  
177 statistical software. Descriptive statistics (mean, standard deviation, frequencies, and percentages) were  
178 used to describe the quantitative and categorical variables.

# 179 **3. Results**

## 180 **3.1. Main Characteristics of the Patients**

181 A total of 1061 AWD patients were admitted to Aleppo University hospital between 22 September and  
182 22 October 2022, with a notable gender distribution showcasing 46.5% as males. The majority were in  
183 the middle-age category (30-60 years) and early childhood (<2 years). A predominant proportion of  
184 patients (58.6%) were residents from urban areas, and (40.3%) were residents from rural areas.  
185 According to the ASA score, 74.4% were healthy (ASA1).

186 In most cases (63%) patients could not define the infection source. It seems that the recent AWD  
187 outbreak in Syria is not associated with tap water contamination, as no clear clustering of cases were  
188 identified. Intriguingly, a diverse range of potential infection sources emerged from patient data within  
189 our hospital, including uncontrolled well water, vegetables (notably parsley and mint, might irrigated  
190 with contaminated water), and fecal-oral transmission through contaminated street/fast food particularly  
191 those integrating vegetables. The summary of the patients' characteristics is shown in **Table 1**.

## 192 **3.2. Clinical Manifestations and Laboratory Findings**

193 The most frequent clinical manifestations of the patients besides diarrhea were nausea and vomiting,  
194 and abdominal cramps (73.6%, 54.3%) respectively. Except for WBC count, most of the patients had  
195 normal laboratory tests. 47.6% of patients had hemoglobin between (10-17 g/dL). Platelets were also  
196 within the normal range in 77.5% of patients. On the other hand, 55.8% of patients had WBC over  
197  $10 \times 10^9/L$ . All Laboratory tests and Clinical Manifestations are demonstrated in detail in **Table 2**.



### 3.3. Patients Management

The mainstay of treatment is aggressive volume repletion with adjuvant antibiotic therapy. 77.7% of patients needed intravenous rehydration, 33.4% were given Lactated Ringer solution, and 23.6% got Isotonic sodium chloride solution. Also, 65.7% got oral rehydration salts (ORS). Regarding antibiotics, doxycycline and ciprofloxacin were prescribed in most (61%). Other antibiotics were also used in some cases, such as tetracycline, trimethoprim/sulfamethoxazole, furazolidone, and others. The accurate proportions are shown in **Table 3**.

### 3.4. Outcome of the Study

According to the available data, 38.7% of patients suffered from serious complications, and the most frequent complications following AWD were mainly electrolyte imbalance (28.2%) and severe dehydration (16.3%). Moreover, complications such as acute kidney injury, volume shock, and hypoglycemia happened in only small proportions. Only four patients (0.4%) passed away during the hospital stay. **Table 4**

## 4. Discussion

Between September and October 2022, Aleppo University Hospital admitted 1061 patients with AWD, most of whom were middle-aged or young children. The results of the 2017 outbreak in Yemen also show a similar pattern to our findings, with the middle-aged (15-49 years) and children (less than 15 years) groups being the most affected.<sup>7,8</sup> In the same context, 69% of those infected with the Nigerian outbreak in 2005 were 15 years old, and above, and 90% of the deaths were in this age group, according to Shittu et al.<sup>9</sup> As well as in the 2004 Nepal outbreak.<sup>10</sup> What may explain these results is that these age groups are more exposed to known sources of infection than others. Females are slightly more affected, but there is no statistical significance for the incidence rates related to sex. This is due to the fact that cholera is an infectious disease. Data from Bangladesh confirm this finding.<sup>11</sup>

The previous outbreak in Syria does not appear to be linked to tap water contamination, but rather to potential sources such as uncontrolled well water and contaminated vegetables, similar to outbreaks in other countries like Yemen and Nigeria.<sup>7,9</sup>

The association of severe watery diarrhea with nausea and vomiting in many unmanaged cases is what worsens the situation and leads the patient to dehydration and electrolyte disturbance, which may be dangerous in many cases. Only a few studies in the medical literature have highlighted this association, including the study that highlighted the AWD during the 2017-2019 Rohingya crisis in Cox's Bazar, Bangladesh.<sup>10</sup>

We relied on case management on what was previously known. We determined the amount and type of fluid resuscitation according to the level of volume depletion. Mild cases, which constitute most cases, were treated with oral rehydration. As for moderate and severe cases, urgent intravenous rehydration through Lactated Ringer solution or isotonic sodium chloride solution was the key to restoring circulation. Nevertheless, antibiotics were also considered in many patients, and electrolyte replacement in selective patients.<sup>12</sup>

38.7% of patients experienced significant complications after being diagnosed with AWD. The most common complications were electrolyte imbalance (28.2%) and severe dehydration (16.3%). Other complications, such as acute kidney injury, volume shock, and hypoglycemia, occurred in smaller numbers. Additionally, only a small percentage of patients (0.4%) died while in the hospital. This is consistent with outbreaks in other countries. Iraq, for instance, confirmed 3,063 cholera cases and 19

240 (0.6%) deaths, while Lebanon announced 5,372 confirmed and suspected cholera cases with 23 (0.4%)  
241 deaths.<sup>3</sup>

## 242 **Conclusion**

243 This study reached descriptive results similar to studies in previous AWD outbreaks in developing  
244 countries such as Yemen, Nigeria, and Lebanon. We reported the source of the infection, such as  
245 contaminated well water and vegetables. However, we did not notice an improvement in the results,  
246 whether in terms of morbidity or mortality, compared to the previous outbreaks. Therefore, future  
247 studies must investigate the risk factors that increase the spread and the severity of the disease and  
248 investigate the best management method.

249 **Competing interests** None declared.

250 **Patient consent for publication** Not required.

## 251 **Data availability statement**

252 The data of our study is available at the corresponding author. We welcome any research group that  
253 can submit a research proposal providing information on background, research questions, and methods  
254 as well as authorship for new collaborations. Research proposals will be reviewed by a scientific  
255 committee.

## 256 **Funding**

257 This research received no specific grant from any funding agency in the public, commercial or not-for-  
258 profit sectors.

## 259 **Authors contributions**

260 Ahmad Yamen Arnaout; Study Coordinator, Study Design, methodology, validation, data analysis, data  
261 interpretation, writing – original draft and reviewing.

262 Yaman Nerabani; writing – original draft and reviewing.

263 Mohamad Nabhan Sawas; data collector, data cleaning, writing – original draft and reviewing.

264 Tala Jouma Alhejazi; writing – original draft and data interpretation.

265 Mohamad Ali Farho; data collector, writing – original draft and reviewing.

266 Muhammad Beshar Shabouk; writing – original draft and reviewing.

267 Hassan Alshaker; writing – original draft and data interpretation.

268 Baraa Shebli; Study Coordinator, and validation.

269 Mostafa Helou; Study Coordinator, and validation.

270 Bashir Badawi Mobaied; Scientific supervision, validation and reviewing.

271 Mohamad Bassel Mouti; Scientific supervision, validation and reviewing.

272 Fares Kady; Scientific supervision, validation and reviewing.

273 Ziad aljarad; Study coordinator, Scientific supervision, validation and reviewing.

274 Aleppo University Hospital Team; Data collection Team. **Table 5**

275

276 **Reference**

- 277 1 Mdriq D. Operation Update Report Iraq : Cholera Outbreak. 2023.
- 278 2 Outbreak C, Overview S. Highlights • 498,703. 2022.
- 279 3 Outbreak C, Report S. WHOLE OF SYRIA WHOLE OF SYRIA. 2022.
- 280 4 Centre C, Vandembroucke JP. Strengthening the reporting of observational studies in  
281 epidemiology ( STROBE ) statement : guidelines for reporting observational studies. 2007;  
282 **335**: 20–2.
- 283 5 Saklad M, Rovenstine E, Taylor I. American Society of Anaesthesiologists physical status  
284 classification. 2011; **55**: 111–5.
- 285 6 S. Chandrasekhar FRS, Laily Noor Ikhsanto jurusan teknik mesin. Guidelines for  
286 implementation. *Liq Cryst* 2020; **21**: 1–17.
- 287 7 Rabaan AA. Cholera : an overview with reference to the Yemen epidemic. 2018.
- 288 8 Alassar MM, Adegboye OA, Emeto TI, Rahman KM, Olumuyiwa L. Original article Severe  
289 dehydration among cholera patients in Yemen : A cohort profile. 2020; **10**: 338–45.
- 290 9 Shittu OB, Akpan I, Popoola TOS, Oyedepo JA, Ogunshola EO. Epidemiological features of a  
291 GIS-supported investigation of cholera outbreak in Abeokuta , Nigeria. 2018; **7**: 1–11.
- 292 10 Rk M, An S, Sk M. Original Article. 2005; **3**: 138–42.
- 293 11 Islam T, Khan AI, Khan H, Tanvir NA, Ahmmed F, Afrad MH. Acute Watery Diarrhea  
294 Surveillance During the Rohingya Crisis 2017 – 2019 in Cox ’ s Bazar , Bangladesh. 2021; **224**:  
295 717–24.
- 296 12 Brandt KG, Maria M, Antunes DC, Alves G. Acute diarrhea : evidence-based management &. *J*  
297 *Pediatr (Rio J)* 2015; : 1–8.

**Table 1: Main Characteristics of the Patients**

|                         | AWD Cases | Percent | Total |
|-------------------------|-----------|---------|-------|
| <b>Gender (Male, n)</b> | 493       | 46.5    | 1061  |
| <b>Age Category</b>     |           |         | 1061  |
| <2                      | 206       | 19.4    |       |

|    |                         |                 |     |      |
|----|-------------------------|-----------------|-----|------|
| 1  |                         |                 |     |      |
| 2  |                         |                 |     |      |
| 3  |                         | 2 -5            | 99  | 9.3  |
| 4  |                         | 5 - 10          | 86  | 8.1  |
| 5  |                         | 10 – 18         | 140 | 13.2 |
| 6  |                         | 18 -30          | 146 | 13.8 |
| 7  |                         | 30 - 60         | 289 | 27.2 |
| 8  |                         | >60             | 95  | 9.0  |
| 9  |                         |                 |     |      |
| 10 | <b>Geographic</b>       |                 |     | 1058 |
| 11 |                         | Urban life      | 620 | 58.6 |
| 12 |                         | Rural life      | 426 | 40.3 |
| 13 |                         | Nomad life      | 12  | 1.1  |
| 14 |                         |                 |     |      |
| 15 | <b>Shock Index (SI)</b> |                 |     | 862  |
| 16 |                         | Under 0.6       | 52  | 6.0  |
| 17 |                         | 0.6 ~ 1 normal  | 399 | 46.3 |
| 18 |                         | 1~ 1.4          | 268 | 31.1 |
| 19 |                         | 1.4 – 2         | 126 | 14.6 |
| 20 |                         | More than 2     | 17  | 2.0  |
| 21 |                         |                 |     |      |
| 22 |                         |                 |     |      |
| 23 | <b>ASA</b>              |                 |     | 1061 |
| 24 |                         | ASA I           | 789 | 74.4 |
| 25 |                         | ASA II          | 224 | 21.1 |
| 26 |                         | ASA III         | 42  | 4.0  |
| 27 |                         | ASA IV          | 6   | 0.6  |
| 28 |                         | ASA V           | 0   |      |
| 29 |                         |                 |     |      |
| 30 | <b>Infection Source</b> |                 |     |      |
| 31 | <b>(as reported by</b>  |                 |     | 1061 |
| 32 | <b>patient)</b>         |                 |     |      |
| 33 |                         | Contaminated    |     |      |
| 34 |                         | Fruits          | 25  | 2.4  |
| 35 |                         | Contaminated    |     |      |
| 36 |                         | Water           | 2   | 0.2  |
| 37 |                         | Corn Cobs       | 1   | 0.1  |
| 38 |                         | Falafel, peanut |     |      |
| 39 |                         | and fatteh      | 15  | 1.4  |
| 40 |                         | Fast Food       | 57  | 5.4  |
| 41 |                         | Fish            | 1   | 0.1  |
| 42 |                         | Ice cream       | 11  | 1.0  |
| 43 |                         | Ice cubes       | 15  | 1.4  |
| 44 |                         | Meat            | 4   | 0.4  |
| 45 |                         | Milk            | 13  | 1.2  |
| 46 |                         | Rice            | 1   | 0.1  |
| 47 |                         | Swimming in a   |     |      |
| 48 |                         | Contaminated    | 3   | 0.3  |
| 49 |                         | Pool            |     |      |
| 50 |                         | The infection   |     |      |
| 51 |                         | passed from     | 30  | 2.8  |
| 52 |                         | his\her family  |     |      |
| 53 |                         | Vegetables such |     |      |
| 54 |                         | as parsley and  | 136 | 12.8 |
| 55 |                         | mint            |     |      |
| 56 |                         | Well Water      | 79  | 7.4  |
| 57 |                         |                 |     |      |
| 58 |                         |                 |     |      |
| 59 |                         |                 |     |      |
| 60 |                         |                 |     |      |

Unknown 668 63.0

**AWD:** Acute Watery Diarrhea, **BMI:** Body Mass Index, **ASA:** American Society of Anesthesiologists Classification.

**ASA I:** Healthy person,

**ASA II:** Mild systemic disease.

**ASA III:** Severe systemic disease.

**ASA IV:** Severe systemic disease that is a constant threat to life.

**ASA IV:** A moribund person who is not expected to survive without the operation.

**ASA V:** A declared brain-dead person whose organs are being removed for donor purposes.

307

308

309

310

**Table 2: Clinical Manifestations and Laboratory Findings**

|                                                      | AWD Cases | Percent | Total |
|------------------------------------------------------|-----------|---------|-------|
| <b>Clinical Presentation in addition to diarrhea</b> |           |         |       |
| Nausea and Vomiting                                  | 781       | 73.6    | 1061  |
| Abdominal cramps                                     | 576       | 54.3    | 1061  |
| Other                                                | 139       | 13.1    | 1061  |
| <b>Severity of dehydration</b>                       |           |         | 1003  |
| Severe                                               | 174       | 17.3    |       |
| Some                                                 | 507       | 50.5    |       |
| None                                                 | 322       | 32.1    |       |
| <b>Laboratory Findings</b>                           |           |         |       |
| <b>Hemoglobin (g/dL)</b>                             |           |         | 845   |
| Less than 10                                         | 197       | 23.3    |       |
| 10 - 12                                              | 243       | 28.8    |       |
| 12 - 17                                              | 387       | 45.8    |       |
| more than 17                                         | 18        | 2.1     |       |
| <b>Platelet (<math>10^3/\mu\text{L}</math>)</b>      |           |         | 821   |
| Less than 15                                         | 3         | 0.4     |       |
| 15 - 30                                              | 6         | 0.7     |       |
| 30 - 50                                              | 4         | 0.5     |       |
| 50 - 150                                             | 50        | 6.1     |       |
| 150 - 450                                            | 636       | 77.5    |       |
| more than 450                                        | 122       | 14.9    |       |
| <b>Serum Creatinine (mg/dl)</b>                      |           |         | 812   |
| less than 0.6                                        | 311       | 38.3    |       |
| 0.6 - 1.3                                            | 344       | 42.4    |       |
| more than 1.3                                        | 157       | 19.3    |       |
| <b>Serum Urea (mg/dl)</b>                            |           |         | 821   |
| 10 - 50                                              | 639       | 77.8    |       |

|                                |               |     |      |     |
|--------------------------------|---------------|-----|------|-----|
|                                | more than 50  | 182 | 22.2 |     |
| <b>WBC (10<sup>9</sup>/L)</b>  |               |     |      | 744 |
|                                | less than 4.5 | 34  | 4.6  |     |
|                                | 4.5 - 10      | 295 | 39.7 |     |
|                                | more than 10  | 415 | 55.8 |     |
| <b>Random Glucose (mg/dl)</b>  |               |     |      | 579 |
|                                | less than 40  | 32  | 5.5  |     |
|                                | 40 - 120      | 365 | 63   |     |
|                                | 120 - 200     | 150 | 25.9 |     |
|                                | more than 200 | 32  | 5.5  |     |
| <b>Serum potassium (mEq/L)</b> |               |     |      | 817 |
|                                | less than 3.5 | 270 | 33   |     |
|                                | 3.5 - 5       | 516 | 63.2 |     |
|                                | more than 5   | 31  | 3.8  |     |
| <b>Serum Sodium (mEq/L)</b>    |               |     |      | 814 |
|                                | less than 135 | 352 | 43.2 |     |
|                                | 135 - 145     | 446 | 54.8 |     |
|                                | more than 145 | 16  | 2    |     |

**AWD:** Acute Watery Diarrhea

**Severity of dehydration:**

Severe (General Inspection: Lethargic, unconscious, floppy, Eyes: Sunken, dry, absent tears, Unable to drink, drinks poorly)

Some (Restless, irritable, Sunken, tears absent, Thirsty, drinks eagerly)

None (General Inspection Well, alert, Skin Pinch Normal, Eyes Normal, tears present, Tongue Moist, No thirst).

**WBC: Wight Blood Cells**

311

312

313

**Table 3: Patients management**

|                                   | AWD Cases | Percent (of total AWD cases) |
|-----------------------------------|-----------|------------------------------|
| <b>Intravenous Rehydration</b>    |           |                              |
| Lactated Ringer solution.         | 354       | 33.4                         |
| Isotonic sodium chloride solution | 250       | 23.6                         |
| Other                             | 138       | 20.7                         |
| Total                             | 728       | 68.6                         |
| <b>ORS rehydration</b>            | 697       | 65.7                         |
| <b>Antibiotic treatment</b>       |           |                              |
| Total                             | 682       | 64.3                         |
| Tetracycline                      | 7         | 0.7                          |
| Doxycycline                       | 328       | 30.9                         |

|                               |     |      |
|-------------------------------|-----|------|
| Trimethoprim/sulfamethoxazole | 2   | 0.2  |
| Furazolidone                  | 5   | 0.5  |
| Ciprofloxacin                 | 319 | 30.1 |
| Ampicillin                    | 0   | 0    |
| Other                         | 233 | 22   |

#### Potassium supplementation

|                             |     |      |
|-----------------------------|-----|------|
| Oral                        | 18  | 1.6  |
| Intravenous                 | 233 | 22.0 |
| Potassium-sparing diuretics | 3   | 0.3  |
| Total                       | 254 | 23.9 |

**AWD:** Acute Watery Diarrhea, **ORS:** Oral Rehydration Solution

314  
315  
316

**Table 4: Outcomes of the Study**

|                                                       | AWD Cases | Percent | Total |
|-------------------------------------------------------|-----------|---------|-------|
| <b>Patient Discharge</b>                              |           |         | 1061  |
| Same day with admission                               | 741       | 69.8    |       |
| Next day                                              | 32        | 3.0     |       |
| After                                                 | 288       | 27.1    |       |
| <b>Need for ICU</b>                                   | 10        | 0.9     | 1061  |
| <b>Need for Dialysis</b>                              | 9         | 1       | 907   |
| <b>Patient Health at discharge*</b>                   |           |         | 1061  |
| Good                                                  | 847       | 79.8    |       |
| Moderate                                              | 187       | 17.6    |       |
| Poor                                                  | 23        | 2.2     |       |
| Died before discharge                                 | 4         | 0.4     |       |
| <b>Complications at admission and in the hospital</b> |           |         |       |
| All                                                   | 411       | 38.7    | 1061  |
| Severe Dehydration                                    | 173       | 16.3    | 1061  |
| Electrolyte Imbalance                                 | 299       | 28.2    | 1061  |
| Acute Kidney Injury                                   | 10        | 0.9     | 1061  |
| Shock                                                 | 21        | 2       | 1061  |
| Hypoglycemia                                          | 32        | 3       | 1061  |
| Other                                                 | 19        | 1.8     | 1061  |
| <b>Patient's Health after follow-up</b>               |           |         | 1061  |
| Good                                                  | 657       | 61.9    |       |
| Moderate                                              | 130       | 12.3    |       |
| Bad                                                   | 52        | 4.8     |       |
| Die (in the hospital)                                 | 4         | 0.4     |       |

**AWD:** Acute Watery Diarrhea.

\*: Good health: the patient no longer had any symptoms or mild symptoms from the convalescent stage. Moderate Health: the patient is still suffering from the symptoms of the disease, but without any serious complications or damage to the organs. Poor health: the patient suffers from complications of the disease and his condition is poor and has never improved.

317

318

319

320

**Table 5: Aleppo University Hospital Team**

| Co-Author ID | First Name  | Middle Name    | Last Name   | E-mail                        | ORCID               | Role            |
|--------------|-------------|----------------|-------------|-------------------------------|---------------------|-----------------|
| 1            | Aalaa       | Mohammed nedal | Al shalabi  | aalaa.al.shalabii@gmail.com   | 0000-0002-2435-7317 | Data Collection |
| 2            | Alaa        | Fawaz          | Dasouki     | alaadasouki2000@gmail.com     | 0000-0002-4856-7351 | Data Collection |
| 2            | Abdulrhman  |                | Brej        | abdalrhmanbreag@gmail.com     | 0000-0002-4166-2954 | Data Collection |
| 3            | Ahmad       | Ryvan          | Shheibar    | ahmad.rayyan.sh.222@gmail.com | 0000-0001-9859-8255 | Data Collection |
| 4            | Ahmed       |                | Alabdullah  | alabdalluhahmed@gmail.com     | 0000-0003-1103-3601 | Data Collection |
| 5            | Alaa        |                | Wais        | waisalaa972@gmail.com         | 0000-0002-2342-4709 | Data Collection |
| 6            | Abd Alazeez |                | Atli        | abdalazizatli@gmail.com       | 0000-0001-7951-3869 | Data Collection |
| 7            | Amira       | Fathi          | Breis       | amirabreis@gmail.com          | 0000-0003-0579-8368 | Data Collection |
| 8            | Bakri       |                | Roumu Jamal | bakri.romi.13@gmail.com       | 0000-0003-0903-0794 | Data Entry      |
| 9            | Baraa       | Ahmad          | Abduljalil  | baraaalderi41@gmail.com       | 0000-0003-2519-2339 | Data Collection |
| 10           | Batoul      | Mohammed       | Mashhadi    | Batoul.mashhadi2001@gmail.com | 0000-0003-2682-7404 | Data Collection |
| 11           | Batoul      |                | Shyah       | shayahbatoul@gmail.com        | 0000-0002-8573-3726 | Data Collection |
| 12           | Bayan       |                | Zitani      | bayanzetani@gmail.com         | 0000-0002-6874-1476 | Data Collection |
| 13           | Fatima      |                | Breim       | fatmehbrim@gmail.com          | 0000-0003-2081-3490 | Data Entry      |
| 14           | Ghina       |                | Maarawi     | ghinazl2017@gmail.com         | 0000-0001-9610-1751 | Data Collection |
| 15           | Hala        |                | Jafa        | halajafa687@gmail.com         | 0000-0002-6984-0484 | Data Collection |
| 16           | Heba        |                | Haj Saleh   | hajsalhbt7@gmail.com          | 0000-0002-9979-4087 | Data Collection |
| 17           | Hiba        |                | Bathish     | hibabathish52@gmail.com       | 0000-0003-4621-8630 | Data Collection |
| 18           | Ibrahim     |                | AL mhawsh   | ibrahim.almh.01@gmail.com     | 0000-0003-0421-9352 | Data Collection |
| 19           | Ibrahim     |                | Arnaout     | ibrahim.arnaout25@gmail.com   | 0000-0002-6498-3822 | Data Entry      |



|    |          |                |             |                              |                     |                                |
|----|----------|----------------|-------------|------------------------------|---------------------|--------------------------------|
| 20 | Joud     |                | Khalili     | khalilijoud@gmail.com        | 0000-0002-0473-3856 | Data Collection/<br>Data Entry |
| 21 | Joud     |                | Markaby     | joudmarkabi5.5@gmail.com     | 0000-0002-7813-8494 | Data Collection                |
| 22 | Joudy    |                | Karh Damour | joudydamoor1999@gmail.com    | 0000-0002-3290-0738 | Data Collection                |
| 23 | Lama     |                | Kanaa       | lama.kanaa59@gmail.com       | 0000-0003-2871-557X | Data Collection/<br>Data Entry |
| 24 | Lana     | issa           | Kitan       | lanakitan.2000@gmail.com     | 0000-0002-3766-6274 | Data Collection                |
| 25 | Leen     |                | Jaber       | leenjaber099@gmail.com       | 0000-0001-6598-0853 | Data Collection                |
| 26 | Leen     |                | Tfnkjy      | leen.tf.610@gmail.com        | 0000-0002-2844-7440 | Data Collection                |
| 27 | Leen     | Zoheir         | Amaraya     | leenamaraya@yahoo.com        | 0000-0001-6285-7745 | Data Collection                |
| 28 | Maher    | Moaammar       | Zeno        | maher.1998.zeno@gmail.com    | 0000-0002-3744-8541 | Data Collection                |
| 29 | Manar    | Haitham        | Nayef       | manarnayef601@gmail.com      | 0000-0003-0687-5468 | Data Collection                |
| 30 | Maram    | Ahmad          | Mobaid      | marammobaid29@gmail.com      | 0000-0001-7716-8299 | Data Collection                |
| 31 | Mawya    | Ghassan        | Alrawi      | mawya2001alrawi@gmail.com    | 0000-0003-1544-2306 | Data Collection                |
| 32 | Maysoon  | Mohammad       | Jadid       | maysoonjadid@gmail.com       | 0000-0001-8510-4172 | Data Collection                |
| 33 | Mohamad  | Ali            | Farho       | ali_fa_2001@hotmail.com      | 0000-0002-3277-2270 | Data Collection/<br>Data Entry |
| 34 | Mohamad  | Amin           | Kreid       | amin.kreid@gmail.com         | 0000-0002-5793-0693 | Data Collection                |
| 35 | Mohamad  | Nabhan         | Sawas       | mo.nabhan.sa@gmail.com       | 0000-0003-4060-6755 | Data Collection/<br>Data Entry |
| 36 | Mohamad  | Nour           | Martini     | mohamadnourmartini@gmail.com | 0000-0001-5711-391X | Data Collection                |
| 37 | MOHAMED  |                | ALKHALIFA   | mohammedkh1762001@gmail.com  | 0000-0002-6004-0261 | Data Collection/<br>Data Entry |
| 38 | Mohammed | Al-mahdi       | Al-kurdi    | mohammedmahdikurdi@gmail.com | 0000-0002-1858-8450 | Data Collection/<br>Data Entry |
| 39 | Mona     | Abdulkader     | Haj mahmoud | monakad2000@gmail.com        | 0000-0002-4613-099X | Data Collection                |
| 40 | Mona     | Najib          | Barakat     | monabarakatt20@gmail.com     | 0000-0002-1039-300X | Data Collection                |
| 41 | Monzer   |                | Keblawy     | monzerkeblawi@gmail.com      | 0000-0002-9075-2446 | Data Collection                |
| 42 | Najlaa   | Mohammad Rabee | Fjleh       | najlaafjleh@gmail.com        | 0000-0002-5169-081X | Data Collection                |
| 43 | Nour     | Mohammed raed  | Arab        | nourarab666@gmail.com        | 0000-0003-2937-2054 | Data Collection                |
| 44 | Ola      |                | Hamdan      | ola.ham9@gmail.com           | 0000-0002-1025-8991 | Data Collection                |
| 45 | Ola      | Fateh          | Alkhalouf   | olakhallouf472@gmail.com     | 0000-0002-4657-9666 | Data Collection                |

|    |          |               |                 |                             |                     |                                |
|----|----------|---------------|-----------------|-----------------------------|---------------------|--------------------------------|
| 46 | Raneem   |               | Sattout         | ra-sa-1999-uni@outlook.com  | 0000-0002-3201-4779 | Data Collection                |
| 47 | Rasha    | Yossef        | Al Ibrahim      | rashaalibrahim68@gmil.com   | 0000-0001-8662-5367 | Data Collection                |
| 48 | Rasha    | Abdullah      | Al aouir        | rashaaouir@gmail.com        | 0000-0002-6330-420X | Data Collection                |
| 49 | Rima     |               | Modabbes        | rimamodabbes@gmail.com      | 0000-0003-1343-6383 | Data Collection                |
| 50 | Roua     |               | Arian           | rouaarian2001@gmail.com     | 0000-0002-3242-3388 | Data Collection                |
| 51 | Saad     |               | Haykal          | saad-haykal@hotmail.com     | 0000-0003-2510-858X | Data Collection                |
| 52 | Sabah    |               | Faour           | dr.sabahfaour@gmail.com     | 0000-0002-8808-9032 | Data Collection                |
| 53 | Salam    | Yones         | Al-wannous      | salamalwannous@gmail.com    | 0000-0002-4278-9615 | Data Collection                |
| 54 | Saleh    |               | Bourghol        | salehbourghol2000@gmail.com | 0000-0003-1342-7073 | Data Collection                |
| 55 | Salma    |               | Alkurayem       | salmakarem645@gmail.com     | 0000-0002-3996-1779 | Data Collection                |
| 56 | Sana     | Ahmad         | Masoud          | sosomas528@gmail.com        | 0000-0001-8577-0263 | Data Collection                |
| 57 | Sedra    | Mohammad Anas | helou           | sedrahelou22@gmail.com      | 0000-0003-1463-4824 | Data Collection                |
| 58 | Shahed   | Ammar         | Rihawi          | shahed.rihawi18@gmail.com   | 0000-0002-8582-3430 | Data Collection                |
| 59 | shaimaa  |               | radwan          | shaima.radwan111@gmail.com  | 0000-0001-7059-5722 | Data Collection                |
| 60 | Sima     | Mohannad      | Sagheer         | simasagheer6@gmail.com      | 0000-0003-4860-6039 | Data Collection                |
| 61 | Toka     |               | Adna            | tokaadna@gmail.com          | 0000-0001-8304-5893 | Data Collection                |
| 62 | Wael     |               | Najeb           | waelnajeb2001@gmail.com     | 0000-0001-9155-8525 | Data Collection                |
| 63 | Wafaa    |               | Jawesh          | wafaa77jawesh54@gmail.com   | 0000-0001-5301-8763 | Data Collection                |
| 64 | Wesam    |               | Hritani         | hritaniwesam@gmail.com      | 0000-0002-6277-5704 | Data Collection                |
| 65 | Yahya    |               | Dordi           | yahia.dordie@gmail.com      | 0000-0002-5401-8068 | Data Collection/<br>Data Entry |
| 66 | Yamama   |               | Alali           | alaliyamama@gmail.com       | 0000-0001-7350-0370 | Data Collection                |
| 67 | Yasmen   | Saber         | Toffaha         | yasmentoffaha804@gmail.com  | 6647-1254-0002-0000 | Data Collection                |
| 68 | Zein     | A             | Alsayed-Ahmad   | zaynalsayd@gmail.com        | 0000-0001-7505-1521 | Data Collection                |
| 69 | Rayan    |               | Badawi          | rayan.m.badawi@gmail.com    | 0000-0002-4685-631X | Data Collection                |
| 70 | Ghina    | Motaz         | Ghannam         | ghanojeh03@gmail.com        | 0000-0002-4772-022X | Data Collection                |
| 71 | Mahmoud  | Mohamad       | Mohamad Alhasan | mahmoud7alhasan@gmail.com   | 0000-0001-8958-8872 | Data Collection                |
| 72 | Abdullah | Mohammed      | Al-Nabbash      | boodi-97@hotmail.com        | 0000-0002-3180-0663 | Data Collection                |
| 73 | Ayah     |               | Kouli           | ayaqouli@gmail.com          | 0000-0002-6306-3354 | Data Collection                |
| 74 | Toula    |               | Bayaa           | toulabayaa72@gmail.com      | 0000-0003-3186-0794 | Data Collection                |

|    |          |             |               |                                 |                     |                 |
|----|----------|-------------|---------------|---------------------------------|---------------------|-----------------|
| 75 | Osama    | Abd         | Alhaji        | osama.haji.1996@gmail.com       | 0000-0003-4218-7443 | Data Collection |
| 77 | Ibrahim  |             | Al Tabbaa     | i.tabbaa@hotmail.com            | 0000-0001-7077-2418 | Data Collection |
| 78 | Mary     |             | Alakkash      | www.marwa97awram97@gmail.com    | 0000-0002-4844-1708 | Data Collection |
| 79 | Shamma   | Alaa Aldeen | Alothman      | Dr.Shammaalothman@gmail.com     |                     | Data Collection |
| 80 | Fatima   |             | Abazid        | fatima.abz1998@gmail.com        | 0000-0002-8876-8553 | Data Collection |
| 81 | Rima     | Saad        | Taleb         | rimataleb812@gmail.com          |                     | Data Collection |
| 82 | Bayan    |             | Rokia         | bayan.kyr@gmail.com             | 0009-0002-1844-7313 | Data Collection |
| 83 | Ahmad    | Saher       | Aljarad       | ahmadjarad1998@gmail.com        | 0000-0002-0728-4179 | Data Collection |
| 84 | Dimah    |             | Tarabelsi     | dimah95trabelsi@gmail.com       | 0000-0002-6262-9133 | Data Collection |
| 85 | Amr      |             | Hamza         | amr.f.hamza97@gmail.com         | 0000-0001-6520-3595 | Data Collection |
| 86 | Ahmad    | Fadel       | Karaze        | ahmad.syr.333@hotmail.com       | 0000-0002-9775-2748 | Data Collection |
| 87 | Eman     | Abdulrahman | Ibrahim       | emanibrahim20172020@hotmail.com | 0000-0002-1560-2771 | Data Collection |
| 88 | Hasan    |             | Hamsho        | hassonhamsho@gmail.com          | 0000-0002-9924-4691 | Data Collection |
| 89 | Ola      |             | Ramadan       | olazr97@gmail.com               | 0000-0003-2251-5462 | Data Collection |
| 90 | Ola      |             | Alzalek       | ola1997823@gmail.com            | 0000-0001-7827-8094 | Data Collection |
| 91 | Noor     |             | Masri         | nournourmisri@gmail.com         | 0000-0003-4372-4853 | Data Collection |
| 92 | Abdullah | Ahmad       | Mohammad Mano | abdullahaboahmad97@gmail.com    | 0000-0003-4843-8514 | Data Collection |
| 93 | Wajeh    |             | Kurdi         | wajehoooov@gmail.com            | 0000-0001-5721-2141 | Data Collection |
| 94 | Arij     |             | Assi          | sandrela_-sweet@hotmail.com     | 0000-0002-3020-4317 | Data Collection |
| 95 | Fatima   |             | Abazid        | fatima.abz1998@gmail.com        | 0000-0002-8876-8553 | Data Collection |
| 96 | Tasnim   | Zakaria     | Bathish       | tasnimbathish0@gmail.com        | 0009-0001-7544-6889 | Data Collection |

321

# Acute Watery Diarrhea Patient Data Collection Form

## Data collection form for Acute Watery Diarrhea Patients

### **Part A: Demographics**

- 1) ID \_\_\_\_\_
- 2) Gender: Male / Female
- 3) Patient Age \_\_\_\_\_
- 4) Geographic
  - Urban life
  - Rural life
  - Nomad life
- 5) Potential Source of Infection \_\_\_\_\_

### **Part B: Admission details**

#### **1) Admission Date DD/MM/YYYY**

**2) Diarrhea Onset before** \_\_\_\_\_ **days**

#### **3) Clinical Presentation**

- Diarrhea**  
**how many times in a day?** \_\_\_\_\_.
- Vomiting**
- Abdominal cramps**
- Fever**
- Dehydration**
- Other**  
**If Other, Please Specify**  
\_\_\_\_\_  
\_\_\_\_\_

#### **4) Chief Complaint was**

#### **5) Assessment of severity of dehydration:**

- **Severe (General Inspection: Lethargic, unconscious, floppy, Eyes: Sunken, dry, tears absent, Unable to drink, drinks poorly)**
- **Some (Restless, irritable, Sunken, tears absent, Thirsty, drinks eagerly)**
- **None (General Inspection Well, alert, Skin Pinch Normal, Eyes Normal, tears present, Tongue Moist, No thirst)**

#### **Part D: Co-morbidities**

- 1) Height \_\_\_\_\_ m
- 2) Weight \_\_\_\_\_ kg
- 3) Patient BMI \_\_\_\_\_ kg/m<sup>2</sup>
- 4) Heart Rate \_\_\_\_\_
- 5) Blood Pressure \_\_\_\_\_
- 7) Shock Index (SI) (heart rate (HR) / systolic blood pressure (SBP) ) \_\_\_\_\_
- 6) ASA Grade (chose number between 1 >>5) \_\_\_\_\_
  - ASA 1: Healthy person. Example: Fit, nonobese (BMI under 30), a nonsmoking patient with good exercise tolerance.
  - ASA 2: well-controlled disease (e.g., treated hypertension, obesity with BMI under 35, frequent social drinker, or cigarette smoker).
  - ASA 3: a severe systemic disease that is not life-

threatening. (e.g., poorly treated hypertension or diabetes, morbid obesity, chronic renal failure).

- ASA 4: a severe systemic disease that is a constant threat to life.
- ASA 5: A moribund person who is not expected to survive without the intervention.

#### **7) Comorbidities:**

- Diabetes mellitus
- Hypertension requiring medication
- Ischemic heart disease
- Chronic obstructive pulmonary disease (COPD)
- Asthma
- Ulcer disease
- Known liver cirrhosis
- Deep Vein Thrombosis
- Urinary Tract infection
- Chronic immunosuppression
- Cerebrovascular accident
- Chronic kidney disease (on dialysis or GFR <30 mL/min/1.73m<sup>2</sup>)
- Others (18)

If other, please Specify

#### **8) Past history of COVID-19 infection (within the last 6 months)**

- Yes
- No

Time gap between COVID-19 infection and Cholera Infection (in weeks): \_\_\_\_\_ Weeks

## 9) Previous open abdominal surgery/laparotomy

- 1     ○ Yes  
2  
3     ○ No

4 If Yes, please indicate the cause

## 10) Past Gastrointestinal Surgery

- 7     ○ Yes  
8  
9     ○ No

10 If Yes, please indicate the Cause

## 11) Past Medicine History:

- 15    Antacids  
16    Histamine receptor blockers  
17    Proton pump inhibitors (PPI)  
18    Antibiotics (within last month)

19 If Yes, please specify Antibiotics Group

- 24    Other

## 12) Current smoker within 1 year: (even with hookah)

- 28   ○ Active smoker  
29         ○ A daily smoker  
30         ○ An occasional smoker  
31  
32   ○ Ex-smoker  
33   ○ Never smoked

## 13) Is the patient:

- 35   ○ Not drinking alcohol.  
36  
37   ○ Drinking alcohol in moderation (2 drinks or less  
38   in a day for men and 1 drink or less in a day for  
39   women)  
40

- Binge Drinking (consuming 5 or more drinks  
(male), or 4 or more drinks (female), in about 2  
hours.)  
○ Heavy Alcohol Use (binge drinking on 5 or  
more days in the past month.)

## 14) Cholera Vaccine

- Yes  
○ No

If yes, please specify the type of Vaccine

**Part E: Cholera Workup****1) Diagnosis was made according to:**

- **Clinically (According to WHO: In an area  
with a noted cholera epidemic, a patient aged  
5 years or older develops acute watery  
diarrhea, with or without vomiting)**  
○ **Biochemical confirmation and  
characterization of the isolate.**  
○ **Polymerase chain reaction (PCR) tests.**

**2) If Biochemical confirmation and characterization  
of the isolate was done please tick all that apply**

- Stool Examination**  
 **Stool Culture**  
 **Serotyping and Biotyping**  
**If done, Please specify the type**

- Hematologic Tests**  
 **Metabolic Panel**

**3) Laboratory findings (If done)**

- Hemoglobin (g/dL) \_\_\_\_\_  
• Platelet ( $10^3$  / $\mu$ L) \_\_\_\_\_  
• Bilirubin Total (mg/dL) \_\_\_\_\_

- Bilirubin direct (mg/dL) \_\_\_\_  
• AST (U/L) \_\_\_\_\_  
• ALT (U/L) \_\_\_\_\_  
• Urea (mg/dL) \_\_\_\_\_  
• Serum creatinine (mg/dL)\_\_\_\_  
• Alkaline phosphatase \_\_\_\_\_  
• White blood cell count,  $10^9/L$  \_\_\_\_\_  
• K+ \_\_\_\_\_  
• Na+ \_\_\_\_\_  
• HCO<sub>3</sub><sup>-</sup> \_\_\_\_\_  
• Pco<sub>2</sub> \_\_\_\_\_  
• Ph \_\_\_\_\_  
• Glucose \_\_\_\_\_  
• Blood type (ABO +/-) \_\_\_\_\_

**Part F: Treatment & Management****1) Intravenous Rehydration**

- Yes  
○ No

If yes, please set the volume of intravenous infusion at  
the day case\_\_\_\_\_ ml/day case. (example: 2000 ml / day  
case)

Set the rate of Intravenous Rehydration

\_\_\_\_\_ ml/kg in hours (example;  
30ml/kg in first hour then 70 ml / kg in next five  
hours)

Type of solution

- **Lactated Ringer solution.**  
○ **Isotonic sodium chloride solution**  
○ **Other** \_\_\_\_\_

**2) ORS rehydration:**

- Yes  
○ No

**If yes, please set the volume of ORS Solution at the day case**

\_\_\_\_\_ ml/day case. (example: 2000 ml / day case)

**Set the rate of Intravenous Rehydration**

\_\_\_\_\_ ml/kg in hours (example; 30ml/kg after each loose stool then 70 ml / kg in next five hours)

**3) Antibiotic treatment**

- Yes
- No

**If yes, please specify**

- Tetracycline
- Doxycycline
- Trimethoprim and sulfamethoxazole
- Furazolidone
- Ciprofloxacin
- Ampicillin
- Other \_\_\_\_\_

**Dose**

- Single dose
- Multiple dose

\_\_\_\_\_ (for example 60 mg / once a day)

**4) Sodium Bicarbonate**

- Yes
- No

**If yes, please specify the reason**

**5) Potassium supplementation**

- Yes

- Oral potassium supplementation
- Intravenous potassium replacement
- Potassium-sparing diuretics

No

**If yes, please specify the reason**

**Part G: Follow-up Data at Staying in hospital**

**1) Patient Discharge**

- Same day with admission
- Next day
- After \_\_\_\_\_ days (example after two days)

**2) Did the patient die?**

- Yes
- No

**If yes, please specify the reason**

**3) Patient Health at discharge**

- Good
- Moderate
- Bad

**4) Did the patient need ICU care?**

- Yes
- No

**If Yes, please describe the reason**

**5) Did the patient need dialysis**

- Yes
- No

**If yes, please specify the reason**

**Did the patient have any complication through staying at hospital?**

- Yes
- No

**If yes, please specify**

**Part H: Follow-up Data during 30 days**

**1) Did the patient have any complication through 30 days after the discharge?**

- Yes
- No

**If yes, please specify** \_\_\_\_\_

**2) Did the patient die as a result of a complication?**

- Yes
- No

**If Yes, please specify the reason**

**3) Any additional pharmacological treatment instituted by the medical team after discharge at home (other than routine treatment and prescription at discharge)**

- Yes
- No

**If Yes, please specify**

**4) Patient Health after 30 days from the admission:**

- Good
- Moderate
- Bad

Any Additional Notes: \_\_\_\_\_

**STROBE 2007 (v4) Statement—Checklist of items that should be included in reports of cohort studies**

| Section/Topic                | Item # | Recommendation                                                                                                                                                                       | Reported on page # |
|------------------------------|--------|--------------------------------------------------------------------------------------------------------------------------------------------------------------------------------------|--------------------|
| <b>Title and abstract</b>    | 1      | (a) Indicate the study’s design with a commonly used term in the title or the abstract                                                                                               | 1,2                |
|                              |        | (b) Provide in the abstract an informative and balanced summary of what was done and what was found                                                                                  | 1,2                |
| <b>Introduction</b>          |        |                                                                                                                                                                                      | <b>3</b>           |
| Background/rationale         | 2      | Explain the scientific background and rationale for the investigation being reported                                                                                                 | 3                  |
| Objectives                   | 3      | State specific objectives, including any prespecified hypotheses                                                                                                                     | 3                  |
| <b>Methods</b>               |        |                                                                                                                                                                                      | <b>4, 5</b>        |
| Study design                 | 4      | Present key elements of study design early in the paper                                                                                                                              | 4                  |
| Setting                      | 5      | Describe the setting, locations, and relevant dates, including periods of recruitment, exposure, follow-up, and data collection                                                      | 4                  |
| Participants                 | 6      | (a) Give the eligibility criteria, and the sources and methods of selection of participants. Describe methods of follow-up                                                           | 4                  |
|                              |        | (b) For matched studies, give matching criteria and number of exposed and unexposed                                                                                                  | 4                  |
| Variables                    | 7      | Clearly define all outcomes, exposures, predictors, potential confounders, and effect modifiers. Give diagnostic criteria, if applicable                                             | 4, 5               |
| Data sources/<br>measurement | 8*     | For each variable of interest, give sources of data and details of methods of assessment (measurement). Describe comparability of assessment methods if there is more than one group |                    |
| Bias                         | 9      | Describe any efforts to address potential sources of bias                                                                                                                            | 4                  |
| Study size                   | 10     | Explain how the study size was arrived at                                                                                                                                            | 4                  |
| Quantitative variables       | 11     | Explain how quantitative variables were handled in the analyses. If applicable, describe which groupings were chosen and why                                                         |                    |
| Statistical methods          | 12     | (a) Describe all statistical methods, including those used to control for confounding                                                                                                | 5                  |
|                              |        | (b) Describe any methods used to examine subgroups and interactions                                                                                                                  | 5                  |
|                              |        | (c) Explain how missing data were addressed                                                                                                                                          | 5                  |
|                              |        | (d) If applicable, explain how loss to follow-up was addressed                                                                                                                       | 5                  |
|                              |        | (e) Describe any sensitivity analyses                                                                                                                                                | 5                  |
| <b>Results</b>               |        |                                                                                                                                                                                      | <b>5, 6</b>        |

|                          |     |                                                                                                                                                                                                              |      |
|--------------------------|-----|--------------------------------------------------------------------------------------------------------------------------------------------------------------------------------------------------------------|------|
| Participants             | 13* | (a) Report numbers of individuals at each stage of study—eg numbers potentially eligible, examined for eligibility, confirmed eligible, included in the study, completing follow-up, and analysed            | 5    |
|                          |     | (b) Give reasons for non-participation at each stage                                                                                                                                                         | 5    |
|                          |     | (c) Consider use of a flow diagram                                                                                                                                                                           | 5    |
| Descriptive data         | 14* | (a) Give characteristics of study participants (eg demographic, clinical, social) and information on exposures and potential confounders                                                                     | 5    |
|                          |     | (b) Indicate number of participants with missing data for each variable of interest                                                                                                                          |      |
|                          |     | (c) Summarise follow-up time (eg, average and total amount)                                                                                                                                                  |      |
| Outcome data             | 15* | Report numbers of outcome events or summary measures over time                                                                                                                                               | 5, 6 |
| Main results             | 16  | (a) Give unadjusted estimates and, if applicable, confounder-adjusted estimates and their precision (eg, 95% confidence interval). Make clear which confounders were adjusted for and why they were included | 5, 6 |
|                          |     | (b) Report category boundaries when continuous variables were categorized                                                                                                                                    |      |
|                          |     | (c) If relevant, consider translating estimates of relative risk into absolute risk for a meaningful time period                                                                                             |      |
| Other analyses           | 17  | Report other analyses done—eg analyses of subgroups and interactions, and sensitivity analyses                                                                                                               |      |
| <b>Discussion</b>        |     |                                                                                                                                                                                                              | 6    |
| Key results              | 18  | Summarise key results with reference to study objectives                                                                                                                                                     |      |
| <b>Limitations</b>       |     |                                                                                                                                                                                                              | 3    |
| Interpretation           | 20  | Give a cautious overall interpretation of results considering objectives, limitations, multiplicity of analyses, results from similar studies, and other relevant evidence                                   |      |
| Generalisability         | 21  | Discuss the generalisability (external validity) of the study results                                                                                                                                        |      |
| <b>Other information</b> |     |                                                                                                                                                                                                              | 7    |
| Funding                  | 22  | Give the source of funding and the role of the funders for the present study and, if applicable, for the original study on which the present article is based                                                | 7    |

\*Give information separately for cases and controls in case-control studies and, if applicable, for exposed and unexposed groups in cohort and cross-sectional studies.

**Note:** An Explanation and Elaboration article discusses each checklist item and gives methodological background and published examples of transparent reporting. The STROBE checklist is best used in conjunction with this article (freely available on the Web sites of PLoS Medicine at <http://www.plosmedicine.org/>, Annals of Internal Medicine at <http://www.annals.org/>, and Epidemiology at <http://www.epidem.com/>). Information on the STROBE Initiative is available at [www.strobe-statement.org](http://www.strobe-statement.org).



# BMJ Open

## Acute Watery Diarrhea Cases During Cholera Outbreak in Syria: A Cohort Study

|                                 |                                                                                                                                                                                                                                                                                                                                                                                                                                                                                                                                                                                                                                                                                                                                                     |
|---------------------------------|-----------------------------------------------------------------------------------------------------------------------------------------------------------------------------------------------------------------------------------------------------------------------------------------------------------------------------------------------------------------------------------------------------------------------------------------------------------------------------------------------------------------------------------------------------------------------------------------------------------------------------------------------------------------------------------------------------------------------------------------------------|
| Journal:                        | <i>BMJ Open</i>                                                                                                                                                                                                                                                                                                                                                                                                                                                                                                                                                                                                                                                                                                                                     |
| Manuscript ID                   | bmjopen-2023-082385.R1                                                                                                                                                                                                                                                                                                                                                                                                                                                                                                                                                                                                                                                                                                                              |
| Article Type:                   | Original research                                                                                                                                                                                                                                                                                                                                                                                                                                                                                                                                                                                                                                                                                                                                   |
| Date Submitted by the Author:   | 22-Mar-2024                                                                                                                                                                                                                                                                                                                                                                                                                                                                                                                                                                                                                                                                                                                                         |
| Complete List of Authors:       | Arnaout, Ahmad; University of Aleppo<br>Nerabani, Yaman; University of Aleppo Faculty of Medicine<br>Sawas, Mohamad Nabhan; University of Aleppo<br>Alhejazi, Tala; University of Aleppo<br>Farho, M. Ali; University of Aleppo<br>Arnaout, Khaled; University of Aleppo<br>Alshaker, Hassan; University of Aleppo<br>Shebli, Baraa; University of Aleppo Faculty of Medicine<br>Helou, Mostafa; University of Aleppo Faculty of Medicine<br>Mobaied, Bashir Badawi; University of Aleppo Faculty of Medicine<br>Mouti, Mohamad Bassel; University of Aleppo<br>Kady, Fares; University of Aleppo Faculty of Medicine<br>Aljarad, Ziad; University of Aleppo Faculty of Medicine<br>AUH Team, Aleppo University Hospital Team; University of Aleppo |
| <b>Primary Subject Heading</b>: | Gastroenterology and hepatology                                                                                                                                                                                                                                                                                                                                                                                                                                                                                                                                                                                                                                                                                                                     |
| Secondary Subject Heading:      | Epidemiology, Infectious diseases, Public health                                                                                                                                                                                                                                                                                                                                                                                                                                                                                                                                                                                                                                                                                                    |
| Keywords:                       | GASTROENTEROLOGY, INFECTIOUS DISEASES, Gastrointestinal infections < GASTROENTEROLOGY, Public health < INFECTIOUS DISEASES                                                                                                                                                                                                                                                                                                                                                                                                                                                                                                                                                                                                                          |
|                                 |                                                                                                                                                                                                                                                                                                                                                                                                                                                                                                                                                                                                                                                                                                                                                     |

SCHOLARONE™  
Manuscripts

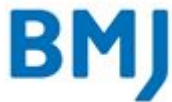

I, the Submitting Author has the right to grant and does grant on behalf of all authors of the Work (as defined in the below author licence), an exclusive licence and/or a non-exclusive licence for contributions from authors who are: i) UK Crown employees; ii) where BMJ has agreed a CC-BY licence shall apply, and/or iii) in accordance with the terms applicable for US Federal Government officers or employees acting as part of their official duties; on a worldwide, perpetual, irrevocable, royalty-free basis to BMJ Publishing Group Ltd ("BMJ") its licensees and where the relevant Journal is co-owned by BMJ to the co-owners of the Journal, to publish the Work in this journal and any other BMJ products and to exploit all rights, as set out in our [licence](#).

The Submitting Author accepts and understands that any supply made under these terms is made by BMJ to the Submitting Author unless you are acting as an employee on behalf of your employer or a postgraduate student of an affiliated institution which is paying any applicable article publishing charge ("APC") for Open Access articles. Where the Submitting Author wishes to make the Work available on an Open Access basis (and intends to pay the relevant APC), the terms of reuse of such Open Access shall be governed by a Creative Commons licence – details of these licences and which [Creative Commons](#) licence will apply to this Work are set out in our licence referred to above.

Other than as permitted in any relevant BMJ Author's Self Archiving Policies, I confirm this Work has not been accepted for publication elsewhere, is not being considered for publication elsewhere and does not duplicate material already published. I confirm all authors consent to publication of this Work and authorise the granting of this licence.

# Acute Watery Diarrhea Cases During Cholera Outbreak in Syria: A Cohort Study

Ahmad Yamen Arnaout<sup>1\*</sup>, Yaman Nerabani<sup>1</sup>, Mohamad Nabhan Sawas<sup>1</sup>, Tala Jouma Alhejazi<sup>1</sup>,  
Mohamad Ali Farho<sup>1</sup>, Khaled Arnaout<sup>1</sup>, Hassan Alshaker<sup>1</sup>, Baraa Shebli<sup>2</sup>, Mostafa Helou<sup>3</sup>, Bashir  
Badawi Mobaied<sup>4</sup>, Mohamad Bassel Mouti<sup>5</sup>, Fares Kady<sup>6</sup>, Ziad Aljarad<sup>4</sup>, Aleppo University  
Hospital Team\*\*

<sup>1</sup> MD, Faculty of Medicine, University of Aleppo, Aleppo, Syrian Arab Republic.

<sup>2</sup> MD, Cardiology Department, Internal Medicine, Aleppo University Hospital, Aleppo, Syrian Arab  
Republic.

<sup>3</sup> MD, Internal Medicine, Aleppo University Hospital, Aleppo, Syrian Arab Republic.

<sup>4</sup> MD, MSc, Ph.D. gastroenterologist, University of Aleppo, Aleppo, Syrian Arab Republic.

<sup>5</sup> MD, MSc, Ph.D. Pediatric Department, Aleppo University Hospital, Aleppo, Syrian Arab Republic.

<sup>6</sup> MD, MPH, MSc, Ph.D. Public Health Specialist

\*: Corresponding Author: [yamen.arnout@gmail.com](mailto:yamen.arnout@gmail.com), (Open Researcher and Contributor ID, 0000-  
0002-1254-6647)

\*\* : Aleppo University Hospital Team: Co-authors participated in collecting data.

## Abstract

1  
2  
3 32 **Objectives:** The aim of this study is a descriptive presentation of cases of acute watery diarrhea  
4 33 (AWD) that were presented to Aleppo University Hospital (AUH) during the recent cholera outbreak  
5 34 in Syria.

6  
7 35 **Design:** Prospective, observational, cohort, study.  
8

9 36 **Setting and Participants:** A total of 1061 AWD patients were admitted to AUH during the timeframe  
10 37 of September 20th, 2022, to October 20th, 2022. The data collection was done through a structured  
11 38 questionnaire. This includes comprehensive clinical observation, laboratory analyses, therapeutic  
12 39 interventions, and holistic case evaluations

13  
14  
15 40 **Results:** The analysis has revealed notable insights; A predominant proportion of patients (58.6%)  
16 41 were residents from urban areas, and (40.3%) were residents from rural areas. Intriguingly, a diverse  
17 42 range of potential infection sources emerged from patient data within our hospital, including  
18 43 uncontrolled well water, vegetables, and fecal-oral transmission through contaminated street/fast food.  
19 44 At discharge, most patients were in good health (79.7%), followed by moderate health (17.6%) and  
20 45 poor health (2.3%), with a minimal percentage dying before discharge (0.4%). The most common  
21 46 complications reported at admission and during hospitalization included electrolyte imbalance  
22 47 (28.2%), followed by severe dehydration (16.3%). In the follow-up period, the majority of patients  
23 48 exhibited good health (81.0%). Older patients (>60 years) had poorer outcomes, with 8.4% having  
24 49 poor health and 4.2% death rate.

25  
26  
27 50 **Conclusions:** The study found results consistent with previous AWD outbreaks in developing  
28 51 countries like Yemen, Nigeria, and Lebanon. Preventative measures like improving water sanitation  
29 52 and hygiene practices are essential to prevent future outbreaks and ease the strain on healthcare  
30 53 systems. Therefore, future studies must investigate the risk factors that increase the spread and the  
31 54 severity of the disease and investigate the best management method.  
32  
33  
34  
35  
36  
37  
38  
39  
40  
41  
42  
43  
44  
45  
46  
47  
48  
49  
50  
51  
52  
53  
54  
55  
56  
57  
58  
59  
60

### 66 **Strengths and limitations**

- 67 • The study provided a comprehensive analysis of AWD cases in Aleppo University Hospital  
68 following the declaration of a cholera outbreak in Syria, offering valuable insights into the  
69 impact and management of the disease.

- By including all patients with AWD, regardless of age or admission status, the research captured a broad spectrum of cases, enhancing the diversity and representativeness of the findings.
- The research, which was non-interventional and based solely on observation, included all patients with AWD, regardless of age or whether they were admitted to the hospital or discharged on the same day.
- The study offers detailed management and clinical assessment data, as well as a two-week post-discharge follow-up.
- As the key medical institution in the city where the first cholera case was identified, this research stands as a crucial resource for understanding and addressing the ongoing outbreak.

## 1. Introduction

Acute Watery Diarrhea (AWD) is a condition that lasts less than 14 days due to an enterotoxigenic bacteria or viral infection in the gastrointestinal system. The bacterial causes of AWD are many, including *Vibrio cholera*, *Shigella*, *Salmonella*, *E Coli*, or *Campylobacter* infection.

Usually, AWD outbreaks are critical challenges to all healthcare systems because of the rapid manifestation and idiopathic source of infection. Besides, most reported cases are distributed in areas where numerous potential sources of infection are found, such as unclean drinking water, insufficiency of water filtration infrastructures, animal exposure, and sewage-contaminated food and drinks. Moreover, these outbreaks differ between countries, depending on healthcare systems and response to emergencies, sanitation of food and water facilities, and population awareness of common infectious diseases. Notably, many countries that used to have low rates of AWD have recently been outbreak locations with new high records. Nearly 70,106 AWD reported cases in only three MENA (Middle East and North Africa) countries so far, according to the WHO's latest December 2022 reports. [1–3]

One of the most suspected and proven causes of AWD cases is Cholera: a waterborne intestinal infection that transmits through the fecal-oral route. To date, cholera remains a global health threat with high morbidity and mortality. Although cholera is easy to treat, delaying rehydration can make it a serious and life-threatening disease as it can cause volume depletion within a few hours. While many countries in the developed world have succeeded in completely eradicating cholera decades ago, cholera still has occasional outbreaks in low- and middle-income countries from time to time. In late 2022, Cholera caused many outbreaks in the Eastern Mediterranean region. Iraq, for instance, confirmed 3,063 cholera cases and 19 deaths, while Lebanon announced 5,372 confirmed and suspected cholera cases with 23 deaths.[1,2] Unfortunately, after nearly 20 years since the last cholera outbreak in Syria, cholera also returned in late 2022 to spread widely in the country, posing a challenge to the health system in the Syrian Arab Republic. [3]

By 10 December 2022 Syria reported 61,671 suspected and confirmed cholera cases, besides 100 deaths among its 14 governorates until 10 December. It all started on 10 September 2022, when the Ministry of Health (MoH) declared a cholera outbreak in Aleppo Governorate. After that date, other governorates enhanced the reporting of AWD cases / cholera-suspected cases, and the numbers of most affected were as follows; 20,103 in Deir Ez-Zor, 14,142 in Idleb, 12,818 in Raqqa, and 11,617 in Aleppo, according to the WHO and the Syrian MoH reports. The reports also stated a case fatality rate of 0.2% and an overall cholera positivity of 46%. [3]

1  
2  
3 112 Despite the high prevalence of AWD and cholera outbreaks in the region, there is a lack of detailed  
4 113 information on the response quality and outcomes in patients and healthcare systems during these  
5 114 emergencies. By reporting on the cases in Aleppo University Hospital (AUH) during the outbreak, we  
6 115 can contribute valuable insights into the effectiveness of the response measures implemented by the  
7 116 health authorities and the challenges faced in managing AWD and cholera cases in a resource-limited  
8 117 setting. This information can help improve future outbreak preparedness and response strategies,  
9 118 potentially reducing morbidity and mortality rates associated with these infectious diseases.

12 119 This study aims to report AWD cases in AUH, Aleppo Governorate, during the outbreak -between 20  
13 120 September and 20 October- and assess the response quality and outcomes in patients and the hospital  
14 121 healthcare system within 30-days of reporting the cases.

## 17 122 **2. Methods**

### 18 123 **2.1. Study design and Participants**

19 124 AWD cases study in Syria is a localized, longitudinal study involving people of all ages. We conducted  
20 125 This prospective cohort profile study to enhance our understanding of AWD and to collect a voluminous  
21 126 and superior-quality dataset concerning the condition. Patients were admitted to AUH between 20th  
22 127 September 2022 and 20th October 2022. The process was initiated following a request for verbal  
23 128 informed consent by physicians prior to the administration of the questionnaire, and in accordance to  
24 129 Strengthening the reporting of observational studies in epidemiology (STROBE) statement. [4]

### 27 130 **2.2. Sample size calculation**

28 131 The sample size for this study was calculated based on the estimated prevalence of AWD in the  
29 132 population. Using a conservative estimate of 2%, a confidence level of 95%, and a margin of error of  
30 133 0.5%, the required sample size was calculated to be 385 participants. To account for potential dropouts  
31 134 and incomplete data, we aimed to recruit a more than 385 participants for this study during the chosen  
32 135 period for the study.

### 36 136 **2.3. Ethical approval**

37 137 The study was approved by the AUH. The data used in this study were completely anonymized before  
38 138 the authors had access to them. Moreover, this study was performed in accordance with the ethical  
39 139 standards as laid down in the 1964 Declaration of Helsinki and its later amendments, and under ethical  
40 140 approval from the ethics committee at the Faculty of Medicine, University of Aleppo, with registered  
41 141 reference number 1932, ensuring compliance with ethical standards and guidelines for research  
42 142 involving human subjects.

### 45 143 **2.4. Bias**

46 144 The dean of the faculty of medicine, the head of the Department of Internal Medicine, the head of the  
47 145 Department of Pediatric Medicine, and the general director of AUH Performed the overall review and  
48 146 validation of the project. The medical staff also participated in the research work. Investigators  
49 147 performed fieldwork; interviewers (in charge of the interview and filling out the data) and doctors  
50 148 (responsible for health assessment). We spare no effort to ensure that all data was registered accurately.

### 53 149 **2.5. Data collection and Variables**

54 150 The patients were interviewed through a structured questionnaire to gather the patients' characteristics,  
55 151 including demographics (i.e., age, gender, place of residence), admission details (e.g., dehydration and  
56 152 loss of fluid, stool description.), comorbidities, and previous medications.

57 153 Clinical examination and patients' history data were also recorded, such as measuring blood pressure  
58 154 and heart rate and taking clinical symptoms such as diarrhea, nausea and vomiting, fever, and others.

1  
2  
3 155 Moreover, we recorded cholera details, including diagnosis, laboratory findings, rehydration,  
4 156 management, and follow-up.

6 157 The questionnaire was designed according to the international standards. All laboratory analyses were  
7 158 conducted by the central laboratory at AUH, such as count blood cells, and Blood biochemistry (Blood  
8 159 glucose, Serum creatinine, Urea, k+, Na+).

10 160 The Patients were also categorized into five grades based on their health status using the American  
11 161 Society of Anaesthesiologists physical status classification. [5] Habits, including smoking and alcohol  
12 162 consumption, were evaluated using WHO's Smoking and Tobacco Use Policy which classifies patients  
13 163 into four categories: A daily smoker, who smokes any tobacco product at least once a day, an occasional  
14 164 smoker, who smokes, but not every day, a former smoker and a never smoker. [6]

17 165 The age of the patients was divided into several age groups.

19 166 The patients were evaluated, and their data was recorded during the hospital stay and two weeks after  
20 167 their discharge, and if their condition did not improve after two weeks, they were followed up for 30  
21 168 days.

23 169 The patients were evaluated at discharge and two weeks later and classified into several health  
24 170 categories: good health: the patient no longer has any symptoms or mild symptoms from the  
25 171 convalescent stage. Moderate Health: the patient is still suffering from the symptoms of the disease but  
26 172 without any serious complications or organ damage. Poor health: the patient suffers from complications  
27 173 of the disease and his condition is poor and has never improved. And the patient passed away.  
28 174 Complications of AWD were recorded and the severity of dehydration was assessed.

31 175 Patient Data Collection Form is shown in **Supplementary File A**.

## 33 176 **2.6. Patient and public involvement**

34 177 The patients did not participate in the questionnaire design, biological measurements, or outcome  
35 178 measures; neither did they participate in the design, recruitment, and conducting of the study.  
36 179 Furthermore, all patients or their families were informed about the use of the data for research purposes  
37 180 in this study.

## 40 181 **2.7. Statistical methods**

41 182 Patient data extracts were entered into an Excel database and analyzed using the SPSS statistical  
42 183 software, version 26.0. Descriptive statistics, including frequencies and percentages, were employed to  
43 184 summarize the main results of the patients, encompassing gender, age category, geographic location,  
44 185 shock index, ASA, and infection source. Quantitative variables were categorized, and frequencies and  
45 186 percentages for these categories were calculated. Subgroups were analyzed by age groups for all main  
46 187 study variables to provide a comprehensive assessment of the data. To address missing data in our study,  
47 188 the last observation carried forward technique was employed. This method entails carrying forward the  
48 189 most recent recorded observation to fill in missing data points during follow-ups. The follow-up period  
49 190 lasted two weeks, but extended up to a month for patients with worsening conditions. By utilizing this  
50 191 approach, we were able to methodically handle missing data and guarantee that our analyses were  
51 192 conducted using the most comprehensive dataset possible.

## 55 193 **3. Results**

### 56 194 **3.1. Main Characteristics of the Patients**

58 195 A total of 1061 AWD patients were admitted to AUH between 22 September and 22 October 2022, with  
59 196 a notable gender distribution showcasing 46.5% as males. The majority were in the middle-age category

197 (30-60 years) and early childhood (<2 years). A predominant proportion of patients (58.6%) were  
198 residents from urban areas, and (40.3%) were residents from rural areas. According to the ASA score,  
199 74.4% were healthy (ASA1).

200 In most cases (63%) patients could not define the infection source. It seems that the recent AWD  
201 outbreak in Syria is not associated with tap water contamination, as no clear clustering of cases were  
202 identified. Intriguingly, a diverse range of potential infection sources emerged from patient data within  
203 our hospital, including uncontrolled well water, vegetables (notably parsley and mint, might irrigated  
204 with contaminated water), and fecal-oral transmission through contaminated street/fast food particularly  
205 those integrating vegetables. The summary of the patients' characteristics is shown in **Table 1**.

### 206 **3.2. Clinical Manifestations and Laboratory Findings**

207 The most frequent clinical manifestations of the patients besides diarrhea were nausea and vomiting,  
208 and abdominal cramps (73.6%, 54.3%) respectively. Except for WBC count, most of the patients had  
209 normal laboratory tests. 47.6% of patients had hemoglobin between (10-17 g/dL). Platelets were also  
210 within the normal range in 77.5% of patients. On the other hand, 55.8% of patients had WBC over  
211  $10 \times 10^9/L$ . All Laboratory tests and Clinical Manifestations are demonstrated in detail in **Table 2**.

### 212 **3.3. Patients Management**

213 The mainstay of treatment is aggressive volume repletion with adjuvant antibiotic therapy. 77.7% of  
214 patients needed intravenous rehydration, 33.4% were given Lactated Ringer solution, and 23.6% got  
215 Isotonic sodium chloride solution. Also, 65.7% got oral rehydration salts (ORS). Regarding antibiotics,  
216 doxycycline and ciprofloxacin were prescribed in most (61%). Other antibiotics were also used in some  
217 cases, such as tetracycline, trimethoprim/sulfamethoxazole, furazolidone, and others. The accurate  
218 proportions are shown in **Table 3**.

### 219 **3.4. Outcome of the Study**

220 The table provides results from a study on patients with Acute Watery Diarrhea (AWD). Of the 1061  
221 cases, most patients were discharged the same day as admission (69.8%), with smaller percentages  
222 discharged the next day (3.0%) or after a longer period (27.1%). A small number of patients required  
223 ICU care (0.9%) and dialysis (1%). At discharge, the majority of patients had good health (79.7%),  
224 followed by moderate health (17.6%) and poor health (2.3%). A very small percentage of patients died  
225 before discharge (0.4%).

226 Complications reported at admission and during the hospital stay include severe dehydration (16.3%),  
227 electrolyte imbalance (28.2%), acute kidney injury (0.9%), shock (2.0%), hypoglycemia (3.0%), and  
228 other issues (1.8%). Among them, the most common complications were electrolyte imbalance (28.2%)  
229 followed by severe dehydration (16.3%).

230 In the follow-up period, most patients showed good health (81.0%), followed by moderate health  
231 (14.6%) and poor health (3.4%). A small number of patients died during follow-up, with four deaths at  
232 AUH and six deaths at other hospitals (0.9% in total). **Table 4**

233 Sub-group analysis after two weeks to one month from admission, the majority of patients in all age  
234 classifications showed good health outcomes, with percentages ranging from 69.5% to 88.9%. The  
235 highest percentage of patients with bad health outcomes were in the Age7 (>60 years) category at 8.4%,  
236 while the highest percentage of deaths occurred in the same age group at 4.2%, followed by individuals  
237 under 2 years at 1.5%. Overall, the data suggests variations in patient health outcomes based on age,  
238 with younger individuals having a higher likelihood of better health outcomes compared to older age  
239 groups.



1  
2  
3 240 Upon analysis two weeks to one month after admission, the data revealed that a large percentage of  
4 241 patients across all age groups experienced positive health outcomes, ranging from 69.5% to 88.9%. The  
5 242 Age7 (>60 years) group had the highest percentage of patients with poor health outcomes at 8.4%, while  
6 243 the highest death rate was observed in the same age group at 4.2%, followed closely by patients under  
7 244 2 years at 1.5%. These findings indicate varying health outcomes based on age, with younger patients  
8 245 generally showing a greater probability of recovery compared to older individuals. (Supplementary  
9 246 File B)

#### 11 247 4. Discussion

12  
13 248 Between September and October 2022, AUH admitted 1061 patients with AWD, most of whom were  
14 249 middle-aged or young children. The results of the 2017 outbreak in Yemen also show a similar pattern  
15 250 to our findings, with the middle-aged (15-49 years) and children (less than 15 years) groups being the  
16 251 most affected.[7,8] In the same context, 69% of those infected with the Nigerian outbreak in 2005 were  
17 252 15 years old, and above, and 90% of the deaths were in this age group, according to Shittu et al.[9] As  
18 253 well as in the 2004 Nepal outbreak.[10] What may explain these results is that these age groups are more  
19 254 exposed to known sources of infection than others. Females are slightly more affected, but there is no  
20 255 statistical significance for the incidence rates related to sex. This is due to the fact that cholera is an  
21 256 infectious disease. Data from Bangladesh confirm this finding.[11]

22  
23 257 The previous outbreak in Syria does not appear to be linked to tap water contamination, but rather to  
24 258 potential sources such as uncontrolled well water and contaminated vegetables, similar to outbreaks in  
25 259 other countries like Yemen and Nigeria. [7,9]

26  
27 260 The association of severe watery diarrhea with nausea and vomiting in many unmanaged cases is what  
28 261 worsens the situation and leads the patient to dehydration and electrolyte disturbance, which may be  
29 262 dangerous in many cases. Only a few studies in the medical literature have highlighted this association,  
30 263 including the study that highlighted the AWD during the 2017-2019 Rohingya crisis in Cox's Bazar,  
31 264 Bangladesh. [10]

32  
33 265 We relied on case management on what was previously known. We determined the amount and type of  
34 266 fluid resuscitation according to the level of volume depletion. Mild cases, which constitute most cases,  
35 267 were treated with oral rehydration. As for moderate and severe cases, urgent intravenous rehydration  
36 268 through Lactated Ringer solution or isotonic sodium chloride solution was the key to restoring  
37 269 circulation. Nevertheless, antibiotics were also considered in many patients, and electrolyte replacement  
38 270 in selective patients.[12]

39  
40 271 38.7% of patients experienced significant complications after being diagnosed with AWD. The most  
41 272 common complications were electrolyte imbalance (28.2%) and severe dehydration (16.3%). Other  
42 273 complications, such as acute kidney injury, volume shock, and hypoglycemia, occurred in smaller  
43 274 numbers. Additionally, only a small percentage of patients (0.4%) died while in the hospital. This is  
44 275 consistent with outbreaks in other countries. Iraq, for instance, confirmed 3,063 cholera cases and 19  
45 276 (0.6%) deaths, while Lebanon announced 5,372 confirmed and suspected cholera cases with 23 (0.4%)  
46 277 deaths. [3]

47  
48 278 This study has several limitations that impact the generalizability and validity of the findings. Firstly,  
49 279 the limited sample size, as the study was conducted at AUH, may not accurately represent all cases of  
50 280 AWD in Syria. Additionally, selection bias was introduced as only cases admitted to the hospital were  
51 281 included, potentially skewing the results. The lack of long-term follow-up limited the assessment of  
52 282 outcomes beyond 30 days post-discharge. The study was limited to a specific region in Syria and may

283 not be applicable to other regions with different healthcare settings, demographics, and environmental  
284 factors.

## 285 **Conclusion**

286 This study reached descriptive results similar to studies in previous AWD outbreaks in developing  
287 countries such as Yemen, Nigeria, and Lebanon. We reported the source of the infection, such as  
288 contaminated well water and vegetables. However, we did not notice an improvement in the results,  
289 whether in terms of morbidity or mortality, compared to the previous outbreaks. Therefore, future  
290 studies must investigate the risk factors that increase the spread and the severity of the disease and  
291 investigate the best management method.

292 **Competing interests** None declared.

293 **Patient consent for publication** Not required.

## 294 **Supplementary Files Description**

295 Supplementary File A Data Collection Acute Watery Diarrhea Study Sheet.docx

296 Supplementary File B Subgroups Age Analysis.docx

## 297 **Data availability statement**

298 The establishment of a dataset comprising over a thousand patients with AWD during the 2022  
299 cholera outbreak in Aleppo, Syria, along with comprehensive patient observations, holds significant  
300 importance. By documenting and analyzing such a large dataset, we are better positioned to  
301 understand the characteristics, trends, and outcomes of cholera cases during this particular outbreak.  
302 This dataset can serve as a valuable resource for public health officials, researchers, and healthcare  
303 providers in devising strategies for more effective prevention, treatment, and control of cholera in  
304 similar settings. The dataset is available at the corresponding author. We welcome any research group  
305 that can submit a research proposal providing information on background, research questions, and  
306 methods as well as authorship for new collaborations. Research proposals will be reviewed by a  
307 scientific committee. Additionally, when referencing or using this research data, proper citation must  
308 be provided to acknowledge the source and give credit to the original researchers and contributors.  
309 Respecting these guidelines ensures transparency, ethics, and integrity in the utilization of the valuable  
310 data collected and analyzed in this study.

## 311 **Funding**

312 This research received no specific grant from any funding agency in the public, commercial or not-for-  
313 profit sectors.

## 314 **Authors contributions**

315 **Ahmad Yamen Arnaout** played a key role in coordinating the study, designing the study, developing the  
316 methodology, validating the findings, conducting data analysis, interpreting the data, and contributing to the  
317 original draft of the manuscript, as well as review of the final version. **Yaman Nerabani** contributed to the  
318 writing of the original draft and provided critical feedback during the manuscript review process. **Mohamad**  
319 **Nabhan Sawas** was involved in data collection, data cleaning, writing the original draft, and reviewing the  
320 manuscript. **Tala Jouma Alhejazi** was responsible for writing the original draft of the manuscript and  
321 contributing to data interpretation. **Mohamad Ali Farho** participated in data collection, writing the original  
322 draft, and reviewing the manuscript. **Hassan Alshaker, and Khaled Arnaout** provided input in writing the  
323 original draft and contributed to data interpretation. **Baraa Shebli and Mostafa Helou** served as Study  
324 Coordinators and validated the study. **Bashir Badawi Mobaied, Mohamad Bassel Mouti, Fares Kady, and**

325 **Ziad aljarad** provided scientific supervision, validated the study, and critically reviewed the manuscript. The  
326 **Aleppo University Hospital Team** played a critical role in data collection for this study.

## 327 Reference

- 328 1 Mdriq D. Operation Update Report Iraq : Cholera Outbreak. 2023.  
329 2 Outbreak C, Overview S. Highlights • 498,703. 2022.  
330 3 Outbreak C, Report S. WHOLE OF SYRIA WHOLE OF SYRIA. 2022.  
331 4 Centre C, Vandenbroucke JP. Strengthening the reporting of observational studies in  
332 epidemiology ( STROBE ) statement : guidelines for reporting observational studies. 2007;  
333 **335**: 20–2.  
334 5 Saklad M, Rovenstine E, Taylor I. American Society of Anaesthesiologists physical status  
335 classification. 2011; **55**: 111–5.  
336 6 S. Chandrasekhar FRS, Laily Noor Ikhsanto jurusan teknik mesin. Guidelines for  
337 implementation. *Liq Cryst* 2020; **21**: 1–17.  
338 7 Rabaan AA. Cholera : an overview with reference to the Yemen epidemic. 2018.  
339 8 Alassar MM, Adegboye OA, Emeto TI, Rahman KM, Olumuyiwa L. Original article Severe  
340 dehydration among cholera patients in Yemen : A cohort profile. 2020; **10**: 338–45.  
341 9 Shittu OB, Akpan I, Popoola TOS, Oyedepo JA, Ogunshola EO. Epidemiological features of a  
342 GIS-supported investigation of cholera outbreak in Abeokuta , Nigeria. 2018; **7**: 1–11.  
343 10 Rk M, An S, Sk M. Original Article. 2005; **3**: 138–42.  
344 11 Islam T, Khan AI, Khan H, Tanvir NA, Ahmmed F, Afrad MH. Acute Watery Diarrhea  
345 Surveillance During the Rohingya Crisis 2017 – 2019 in Cox ’ s Bazar , Bangladesh. 2021; **224**:  
346 717–24.  
347 12 Brandt KG, Maria M, Antunes DC, Alves G. Acute diarrhea : evidence-based management &. *J*  
348 *Pediatr (Rio J)* 2015; : 1–8.

**Table 1: Main Characteristics of the Patients**

|                         | AWD Cases | Percent | Total |
|-------------------------|-----------|---------|-------|
| <b>Gender (Male, n)</b> | 493       | 46.5    | 1061  |

|                                                          |                                                |     |      |      |
|----------------------------------------------------------|------------------------------------------------|-----|------|------|
| <b>Age Category</b>                                      |                                                |     |      | 1061 |
|                                                          | <2                                             | 206 | 19.4 |      |
|                                                          | 2 -5                                           | 99  | 9.3  |      |
|                                                          | 5 - 10                                         | 86  | 8.1  |      |
|                                                          | 10 – 18                                        | 140 | 13.2 |      |
|                                                          | 18 -30                                         | 146 | 13.8 |      |
|                                                          | 30 - 60                                        | 289 | 27.2 |      |
|                                                          | >60                                            | 95  | 9.0  |      |
| <b>Geographic</b>                                        |                                                |     |      | 1058 |
|                                                          | Urban life                                     | 620 | 58.6 |      |
|                                                          | Rural life                                     | 426 | 40.3 |      |
|                                                          | Nomad life                                     | 12  | 1.1  |      |
| <b>Shock Index (SI)</b>                                  |                                                |     |      | 862  |
|                                                          | Under 0.6                                      | 52  | 6.0  |      |
|                                                          | 0.6 ~ 1 normal                                 | 399 | 46.3 |      |
|                                                          | 1~ 1.4                                         | 268 | 31.1 |      |
|                                                          | 1.4 – 2                                        | 126 | 14.6 |      |
|                                                          | More than 2                                    | 17  | 2.0  |      |
| <b>ASA</b>                                               |                                                |     |      | 1061 |
|                                                          | ASA I                                          | 789 | 74.4 |      |
|                                                          | ASA II                                         | 224 | 21.1 |      |
|                                                          | ASA III                                        | 42  | 4.0  |      |
|                                                          | ASA IV                                         | 6   | 0.6  |      |
|                                                          | ASA V                                          | 0   |      |      |
| <b>Infection Source<br/>(as reported by<br/>patient)</b> |                                                |     |      | 1061 |
|                                                          | Contaminated<br>Fruits                         | 25  | 2.4  |      |
|                                                          | Contaminated<br>Water                          | 2   | 0.2  |      |
|                                                          | Corn Cobs                                      | 1   | 0.1  |      |
|                                                          | Falafel, peanut<br>and fatteh                  | 15  | 1.4  |      |
|                                                          | Fast Food                                      | 57  | 5.4  |      |
|                                                          | Fish                                           | 1   | 0.1  |      |
|                                                          | Ice cream                                      | 11  | 1.0  |      |
|                                                          | Ice cubes                                      | 15  | 1.4  |      |
|                                                          | Meat                                           | 4   | 0.4  |      |
|                                                          | Milk                                           | 13  | 1.2  |      |
|                                                          | Rice                                           | 1   | 0.1  |      |
|                                                          | Swimming in a<br>Contaminated<br>Pool          | 3   | 0.3  |      |
|                                                          | The infection<br>passed from<br>his\her family | 30  | 2.8  |      |

|                                           |     |      |
|-------------------------------------------|-----|------|
| Vegetables such<br>as parsley and<br>mint | 136 | 12.8 |
| Well Water                                | 79  | 7.4  |
| Unknown                                   | 668 | 63.0 |

**AWD:** Acute Watery Diarrhea, **BMI:** Body Mass Index, **ASA:** American Society of

Anesthesiologists Classification.

**ASA I:** Healthy person,

**ASA II:** Mild systemic disease.

**ASA III:** Severe systemic disease.

**ASA IV:** Severe systemic disease that is a constant threat to life.

**ASA IV:** A moribund person who is not expected to survive without the operation.

**ASA V:** A declared brain-dead person whose organs are being removed for donor purposes.

358

359

360

361

**Table 2: Clinical Manifestations and Laboratory Findings**

|                                                        |                     | <b>AWD Cases</b> | <b>Percent</b> | <b>Total</b> |
|--------------------------------------------------------|---------------------|------------------|----------------|--------------|
| <b>Clinical Presentation in addition to diarrhea</b>   |                     |                  |                |              |
|                                                        | Nausea and Vomiting | 781              | 73.6           | 1061         |
|                                                        | Abdominal cramps    | 576              | 54.3           | 1061         |
|                                                        | Other               | 139              | 13.1           | 1061         |
| <b>Severity of dehydration</b>                         |                     |                  |                | 1003         |
|                                                        | Severe              | 174              | 17.3           |              |
|                                                        | Some                | 507              | 50.5           |              |
|                                                        | None                | 322              | 32.1           |              |
| <b>Laboratory Findings</b>                             |                     |                  |                |              |
| <b>Hemoglobin (g/dL)</b>                               |                     |                  |                | 845          |
|                                                        | Less than 10        | 197              | 23.3           |              |
|                                                        | 10 - 12             | 243              | 28.8           |              |
|                                                        | 12 - 17             | 387              | 45.8           |              |
|                                                        | more than 17        | 18               | 2.1            |              |
| <b>Platelet (<math>10^3</math> /<math>\mu</math>L)</b> |                     |                  |                | 821          |
|                                                        | Less than 15        | 3                | 0.4            |              |
|                                                        | 15 - 30             | 6                | 0.7            |              |
|                                                        | 30 - 50             | 4                | 0.5            |              |
|                                                        | 50 - 150            | 50               | 6.1            |              |
|                                                        | 150 - 450           | 636              | 77.5           |              |
|                                                        | more than 450       | 122              | 14.9           |              |
| <b>Serum Creatinine (mg/dl)</b>                        |                     |                  |                | 812          |
|                                                        | less than 0.6       | 311              | 38.3           |              |

|    |                               |               |     |      |
|----|-------------------------------|---------------|-----|------|
| 1  |                               |               |     |      |
| 2  |                               |               |     |      |
| 3  |                               | 0.6 - 1.3     | 344 | 42.4 |
| 4  |                               | more than 1.3 | 157 | 19.3 |
| 5  | <b>Serum Urea (mg/dl)</b>     |               |     | 821  |
| 6  |                               | 10 - 50       | 639 | 77.8 |
| 7  |                               | more than 50  | 182 | 22.2 |
| 8  | <b>WBC (10<sup>9</sup>/L)</b> |               |     | 744  |
| 9  |                               | less than 4.5 | 34  | 4.6  |
| 10 |                               | 4.5 - 10      | 295 | 39.7 |
| 11 |                               | more than 10  | 415 | 55.8 |
| 12 | <b>Random Glucose</b>         |               |     |      |
| 13 | <b>(mg/dl)</b>                |               |     | 579  |
| 14 |                               | less than 40  | 32  | 5.5  |
| 15 |                               | 40 - 120      | 365 | 63   |
| 16 |                               | 120 - 200     | 150 | 25.9 |
| 17 |                               | more than 200 | 32  | 5.5  |
| 18 | <b>Serum potassium</b>        |               |     |      |
| 19 | <b>(mEq/L)</b>                |               |     | 817  |
| 20 |                               | less than 3.5 | 270 | 33   |
| 21 |                               | 3.5 - 5       | 516 | 63.2 |
| 22 |                               | more than 5   | 31  | 3.8  |
| 23 | <b>Serum Sodium (mEq/L)</b>   |               |     | 814  |
| 24 |                               | less than 135 | 352 | 43.2 |
| 25 |                               | 135 - 145     | 446 | 54.8 |
| 26 |                               | more than 145 | 16  | 2    |

**AWD:** Acute Watery Diarrhea

**Severity of dehydration:**

Severe (General Inspection: Lethargic, unconscious, floppy, Eyes: Sunken, dry, absent tears, Unable to drink, drinks poorly)

Some (Restless, irritable, Sunken, tears absent, Thirsty, drinks eagerly)

None (General Inspection Well, alert, Skin Pinch Normal, Eyes Normal, tears present, Tongue Moist, No thirst).

**WBC: Wight Blood Cells**

362

363

364

**Table 3: Patients management**

|                                   | AWD Cases | Percent (of total AWD cases) |
|-----------------------------------|-----------|------------------------------|
| <b>Intravenous Rehydration</b>    |           |                              |
| Lactated Ringer solution.         | 354       | 33.4                         |
| Isotonic sodium chloride solution | 250       | 23.6                         |
| Other                             | 138       | 20.7                         |
| Total                             | 728       | 68.6                         |
| <b>ORS rehydration</b>            | 697       | 65.7                         |

**Antibiotic treatment**

|                               |     |      |
|-------------------------------|-----|------|
| Total                         | 682 | 64.3 |
| Tetracycline                  | 7   | 0.7  |
| Doxycycline                   | 328 | 30.9 |
| Trimethoprim/sulfamethoxazole | 2   | 0.2  |
| Furazolidone                  | 5   | 0.5  |
| Ciprofloxacin                 | 319 | 30.1 |
| Ampicillin                    | 0   | 0    |
| Other                         | 233 | 22   |

**Potassium supplementation**

|                             |     |      |
|-----------------------------|-----|------|
| Oral                        | 18  | 1.6  |
| Intravenous                 | 233 | 22.0 |
| Potassium-sparing diuretics | 3   | 0.3  |
| Total                       | 254 | 23.9 |

**AWD:** Acute Watery Diarrhea, **ORS:** Oral Rehydration Solution

365  
366  
367

**Table 4: Outcomes of the Study**

|                                                       | AWD Cases | Percent | Total |
|-------------------------------------------------------|-----------|---------|-------|
| <b>Patient Discharge</b>                              |           |         | 1061  |
| Same day with admission                               | 741       | 69.8    |       |
| Next day                                              | 32        | 3.0     |       |
| After                                                 | 288       | 27.1    |       |
| <b>Need for ICU</b>                                   | 10        | 0.9     | 1061  |
| <b>Need for Dialysis</b>                              | 9         | 1       | 907   |
| <b>Patient Health at discharge*</b>                   |           |         | 1061  |
| Good                                                  | 846       | 79.7    |       |
| Moderate                                              | 187       | 17.6    |       |
| Poor                                                  | 24        | 2.3     |       |
| Died before discharge                                 | 4         | 0.4     |       |
| <b>Complications at admission and in the hospital</b> |           |         |       |
| All                                                   | 411       | 38.7    | 1061  |
| Severe Dehydration                                    | 173       | 16.3    | 1061  |
| Electrolyte Imbalance                                 | 299       | 28.2    | 1061  |
| Acute Kidney Injury                                   | 10        | 0.9     | 1061  |
| Shock                                                 | 21        | 2       | 1061  |
| Hypoglycemia                                          | 32        | 3       | 1061  |
| Other                                                 | 19        | 1.8     | 1061  |
| <b>Patient's Health after follow-up</b>               |           |         | 1061  |

|          |                                              |      |
|----------|----------------------------------------------|------|
| Good     | 858                                          | 81.0 |
| Moderate | 155                                          | 14.6 |
| Poor     | 36                                           | 3.4  |
| Die      | 10 (4 in AUB,<br>& 6 in a other<br>hospital) | 0.9  |

---

**AWD:** Acute Watery Diarrhea.

\*: Good health: the patient no longer had any symptoms or mild symptoms from the convalescent stage. Moderate Health: the patient is still suffering from the symptoms of the disease, but without any serious complications or damage to the organs. Poor health: the patient suffers from complications of the disease and his condition is poor and has never improved. **AUB:** Aleppo University Hospital.

---

368

369

370

371

372

For peer review only



# Acute Watery Diarrhea Patient Data Collection Form

## Data collection form for Acute Watery Diarrhea Patients

### **Part A: Demographics**

- 1) ID \_\_\_\_\_
- 2) Gender: Male / Female
- 3) Patient Age \_\_\_\_\_
- 4) Geographic
  - Urban life
  - Rural life
  - Nomad life
- 5) Potential Source of Infection \_\_\_\_\_

### **Part B: Admission details**

#### **1) Admission Date DD/MM/YYYY**

**2) Diarrhea Onset before** \_\_\_\_\_ **days**

#### **3) Clinical Presentation**

- Diarrhea**  
**how many times in a day?** \_\_\_\_\_.
- Vomiting**
- Abdominal cramps**
- Fever**
- Dehydration**
- Other**  
**If Other, Please Specify**  
\_\_\_\_\_  
\_\_\_\_\_

#### **4) Chief Complaint was**

#### **5) Assessment of severity of dehydration:**

- **Severe (General Inspection: Lethargic, unconscious, floppy, Eyes: Sunken, dry, tears absent, Unable to drink, drinks poorly)**
- **Some (Restless, irritable, Sunken, tears absent, Thirsty, drinks eagerly)**
- **None (General Inspection Well, alert, Skin Pinch Normal, Eyes Normal, tears present, Tongue Moist, No thirst)**

#### **Part D: Co-morbidities**

- 1) Height \_\_\_\_\_ m
- 2) Weight \_\_\_\_\_ kg
- 3) Patient BMI \_\_\_\_\_ kg/m<sup>2</sup>
- 4) Heart Rate \_\_\_\_\_
- 5) Blood Pressure \_\_\_\_\_
- 7) Shock Index (SI) (heart rate (HR) / systolic blood pressure (SBP) ) \_\_\_\_\_
- 6) ASA Grade (chose number between 1 >>5) \_\_\_\_\_
  - ASA 1: Healthy person. Example: Fit, nonobese (BMI under 30), a nonsmoking patient with good exercise tolerance.
  - ASA 2: well-controlled disease (e.g., treated hypertension, obesity with BMI under 35, frequent social drinker, or cigarette smoker).

- ASA 3: a severe systemic disease that is not life-threatening. (e.g., poorly treated hypertension or diabetes, morbid obesity, chronic renal failure).
- ASA 4: a severe systemic disease that is a constant threat to life.
- ASA 5: A moribund person who is not expected to survive without the intervention.

#### **7) Comorbidities:**

- Diabetes mellitus
- Hypertension requiring medication
- Ischemic heart disease
- Chronic obstructive pulmonary disease (COPD)
- Asthma
- Ulcer disease
- Known liver cirrhosis
- Deep Vein Thrombosis
- Urinary Tract infection
- Chronic immunosuppression
- Cerebrovascular accident
- Chronic kidney disease (on dialysis or GFR <30 mL/min/1.73m<sup>2</sup>)
- Others (18)

If other, please Specify

#### **8) Past history of COVID-19 infection (within the last 6 months)**

- Yes
- No

Time gap between COVID-19 infection and Cholera  
Infection (in weeks): \_\_\_\_\_ Weeks

9) Previous open abdominal surgery/laparotomy

- Yes
- No

If Yes, please indicate the cause

10) Past Gastrointestinal Surgery

- Yes
- No

If Yes, please indicate the Cause

11) Past Medicine History:

- Antacids
- Histamine receptor blockers
- Proton pump inhibitors (PPI)
- Antibiotics (within last month)

If Yes, please specify Antibiotics Group

Other

12) Current smoker within 1 year: (even with hookah)

- Active smoker
  - A daily smoker
  - An occasional smoker
- Ex-smoker
- Never smoked

13) Is the patient:

- Not drinking alcohol.

- Drinking alcohol in moderation (2 drinks or less in a day for men and 1 drink or less in a day for women)
- Binge Drinking (consuming 5 or more drinks (male), or 4 or more drinks (female), in about 2 hours.)
- Heavy Alcohol Use (binge drinking on 5 or more days in the past month.)

14) Cholera Vaccine

- Yes
- No

If yes, please specify the type of Vaccine

#### **Part E: Cholera Workup**

1) Diagnosis was made according to:

- Clinically (According to WHO: In an area with a noted cholera epidemic, a patient aged 5 years or older develops acute watery diarrhea, with or without vomiting)**
- Biochemical confirmation and characterization of the isolate.**
- Polymerase chain reaction (PCR) tests.**

2) If Biochemical confirmation and characterization of the isolate was done please tick all that apply

- Stool Examination
- Stool Culture
- Serotyping and Biotyping

If done, Please specify the type

- Hematologic Tests
- Metabolic Panel

3) Laboratory findings (If done)

- Hemoglobin (g/dL) \_\_\_\_\_
- Platelet ( $10^3 / \mu\text{L}$ ) \_\_\_\_\_
- Bilirubin Total (mg/dL) \_\_\_\_\_
- Bilirubin direct (mg/dL) \_\_\_\_\_
- AST (U/L) \_\_\_\_\_
- ALT (U/L) \_\_\_\_\_
- Urea (mg/dL) \_\_\_\_\_
- Serum creatinine (mg/dL) \_\_\_\_\_
- Alkaline phosphatase \_\_\_\_\_
- White blood cell count,  $10^9/\text{L}$  \_\_\_\_\_
- K+ \_\_\_\_\_
- Na+ \_\_\_\_\_
- HCO<sub>3</sub><sup>-</sup> \_\_\_\_\_
- PCo<sub>2</sub> \_\_\_\_\_
- Ph \_\_\_\_\_
- Glucose \_\_\_\_\_
- Blood type (ABO +/-) \_\_\_\_\_

#### **Part F: Treatment & Management**

1) Intravenous Rehydration

- Yes
- No

If yes, please set the volume of intravenous infusion at the day case

\_\_\_\_\_ ml/day case. (example: 2000 ml / day case)

Set the rate of Intravenous Rehydration

\_\_\_\_\_ ml/kg in hours (example; 30ml/kg in first hour then 70 ml / kg in next five hours)

Type of solution

- Lactated Ringer solution.
- Isotonic sodium chloride solution
- Other \_\_\_\_\_

2) ORS rehydration:

- Yes
- No

If yes, please set the volume of ORS Solution at the day case

\_\_\_\_\_ ml/day case. (example: 2000 ml / day case)

Set the rate of Intravenous Rehydration

\_\_\_\_\_ ml/kg in hours (example; 30ml/kg after each loose stool then 70 ml / kg in next five hours)

3) Antibiotic treatment

- Yes
- No

If yes, please specify

- Tetracycline
- Doxycycline
- Trimethoprim and sulfamethoxazole
- Furazolidone
- Ciprofloxacin
- Ampicillin
- Other \_\_\_\_\_

Dose

- Single dose
- Multiple dose

\_\_\_\_\_ (for example 60 mg / once a day)

4) Sodium Bicarbonate

- Yes
- No

If yes, please specify the reason

5) Potassium supplementation

- Yes
  - Oral potassium supplementation
  - Intravenous potassium replacement
  - Potassium-sparing diuretics
- No

If yes, please specify the reason

**Part G: Follow-up Data at Staying in hospital**

1) Patient Discharge

- Same day with admission
- Next day
- After \_\_\_\_\_ days (example after two days)

2) Did the patient die?

- Yes
- No

If yes, please specify the reason

3) Patient Health at discharge

- Good
- Moderate
- Bad

4) Did the patient need ICU care?

- Yes
- No

If Yes, please describe the reason

5) Did the patient need dialysis

- Yes
- No

If yes, please specify the reason

**Did the patient have any complication through staying at hospital?**

- Yes
- No

If yes, please specify

**Part H: Follow-up Data during 30 days**

1) Did the patient have any complication through 30 days after the discharge?

- Yes
- No

If yes, please specify \_\_\_\_\_

2) Did the patient die as a result of a complication?

- Yes
- No

If Yes, please specify the reason

3) Any additional pharmacological treatment instituted by the medical team after discharge at home (other than routine treatment and prescription at discharge)

- Yes
- No

If Yes, please specify

4) Patient Health after 30 days from the admission:

- Good
- Moderate
- Bad

Any Additional Notes: \_\_\_\_\_

# Supplementary File B Subgroup's analysis

## Symptoms and laboratory findings according to age Class

**(3) Vomiting**

**Yes (1)**

**No (0)**

**\* Age\_ Classification Crosstabulation**

|                                   |   | Age_ Classification          |                    |                      |                       |                      |                       |                   | Total |        |
|-----------------------------------|---|------------------------------|--------------------|----------------------|-----------------------|----------------------|-----------------------|-------------------|-------|--------|
|                                   |   | Age_1 (<2 years)             | Age_1 (2 -5 years) | Age_3 (5 - 10 years) | Age_4 (10 - 18 years) | Age_5 (18 -30 years) | Age_6 (30 - 60 years) | Age_7 (>60 years) |       |        |
| (3) Vomiting<br>Yes (1)<br>No (0) | 0 | Count                        | 42                 | 18                   | 18                    | 33                   | 50                    | 93                | 26    | 280    |
|                                   |   | % within (3) Vomiting        | 15.0%              | 6.4%                 | 6.4%                  | 11.8%                | 17.9%                 | 33.2%             | 9.3%  | 100.0% |
|                                   |   | Yes (1)                      |                    |                      |                       |                      |                       |                   |       |        |
|                                   |   | No (0)                       |                    |                      |                       |                      |                       |                   |       |        |
|                                   |   | % within Age_ Classification | 20.4%              | 18.2%                | 20.9%                 | 23.6%                | 34.2%                 | 32.2%             | 27.4% | 26.4%  |
|                                   |   | % of Total                   | 4.0%               | 1.7%                 | 1.7%                  | 3.1%                 | 4.7%                  | 8.8%              | 2.5%  | 26.4%  |
| 1                                 |   | Count                        | 164                | 81                   | 68                    | 107                  | 96                    | 196               | 69    | 781    |
|                                   |   | % within (3) Vomiting        | 21.0%              | 10.4%                | 8.7%                  | 13.7%                | 12.3%                 | 25.1%             | 8.8%  | 100.0% |
|                                   |   | Yes (1)                      |                    |                      |                       |                      |                       |                   |       |        |
|                                   |   | No (0)                       |                    |                      |                       |                      |                       |                   |       |        |
|                                   |   | % within Age_ Classification | 79.6%              | 81.8%                | 79.1%                 | 76.4%                | 65.8%                 | 67.8%             | 72.6% | 73.6%  |
|                                   |   | % of Total                   | 15.5%              | 7.6%                 | 6.4%                  | 10.1%                | 9.0%                  | 18.5%             | 6.5%  | 73.6%  |
| Total                             |   | Count                        | 206                | 99                   | 86                    | 140                  | 146                   | 289               | 95    | 1061   |
|                                   |   | % within (3) Vomiting        | 19.4%              | 9.3%                 | 8.1%                  | 13.2%                | 13.8%                 | 27.2%             | 9.0%  | 100.0% |
|                                   |   | Yes (1)<br>No (0)            |                    |                      |                       |                      |                       |                   |       |        |

|                              |        |        |        |        |        |        |        |        |
|------------------------------|--------|--------|--------|--------|--------|--------|--------|--------|
| % within Age_ Classification | 100.0% | 100.0% | 100.0% | 100.0% | 100.0% | 100.0% | 100.0% | 100.0% |
| % of Total                   | 19.4%  | 9.3%   | 8.1%   | 13.2%  | 13.8%  | 27.2%  | 9.0%   | 100.0% |

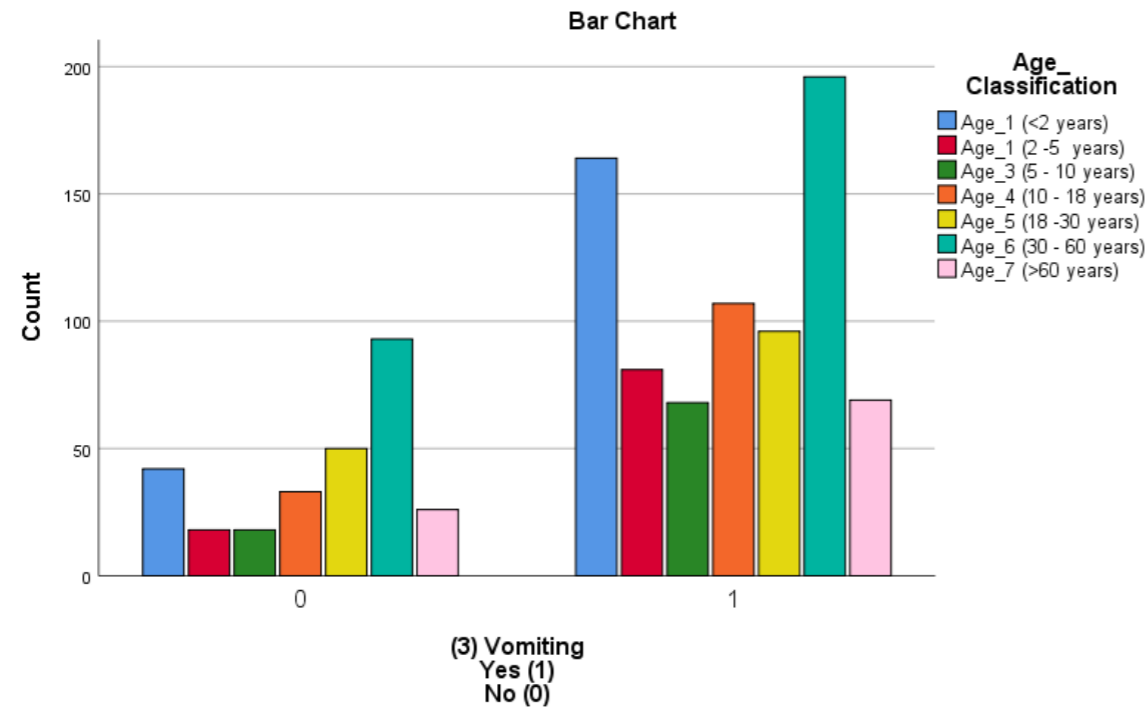

review

**(4) Abdominal cramps**  
Yes (1)

**No (0) \* Age\_ Classification Crosstabulation**

|                      |   | Age_ Classification           |                    |                      |                       |                      |                       |                   | Total |        |
|----------------------|---|-------------------------------|--------------------|----------------------|-----------------------|----------------------|-----------------------|-------------------|-------|--------|
|                      |   | Age_1 (<2 years)              | Age_1 (2 -5 years) | Age_3 (5 - 10 years) | Age_4 (10 - 18 years) | Age_5 (18 -30 years) | Age_6 (30 - 60 years) | Age_7 (>60 years) |       |        |
| (4) Abdominal cramps | 0 | Count                         | 159                | 56                   | 35                    | 60                   | 48                    | 89                | 38    | 485    |
|                      |   | % within (4) Abdominal cramps | 32.8%              | 11.5%                | 7.2%                  | 12.4%                | 9.9%                  | 18.4%             | 7.8%  | 100.0% |
|                      | 1 | Count                         | 47                 | 43                   | 51                    | 80                   | 98                    | 200               | 57    | 576    |
|                      |   | % within (4) Abdominal cramps | 8.2%               | 7.5%                 | 8.9%                  | 13.9%                | 17.0%                 | 34.7%             | 9.9%  | 100.0% |
|                      |   | % of Total                    | 15.0%              | 5.3%                 | 3.3%                  | 5.7%                 | 4.5%                  | 8.4%              | 3.6%  | 45.7%  |

|       |                               |        |        |        |        |        |        |        |        |
|-------|-------------------------------|--------|--------|--------|--------|--------|--------|--------|--------|
|       | % within Age_ Classification  | 22.8%  | 43.4%  | 59.3%  | 57.1%  | 67.1%  | 69.2%  | 60.0%  | 54.3%  |
|       | % of Total                    | 4.4%   | 4.1%   | 4.8%   | 7.5%   | 9.2%   | 18.9%  | 5.4%   | 54.3%  |
| Total | Count                         | 206    | 99     | 86     | 140    | 146    | 289    | 95     | 1061   |
|       | % within (4) Abdominal cramps | 19.4%  | 9.3%   | 8.1%   | 13.2%  | 13.8%  | 27.2%  | 9.0%   | 100.0% |
|       | Yes (1)                       |        |        |        |        |        |        |        |        |
|       | No (0)                        |        |        |        |        |        |        |        |        |
|       | % within Age_ Classification  | 100.0% | 100.0% | 100.0% | 100.0% | 100.0% | 100.0% | 100.0% | 100.0% |
|       | % of Total                    | 19.4%  | 9.3%   | 8.1%   | 13.2%  | 13.8%  | 27.2%  | 9.0%   | 100.0% |

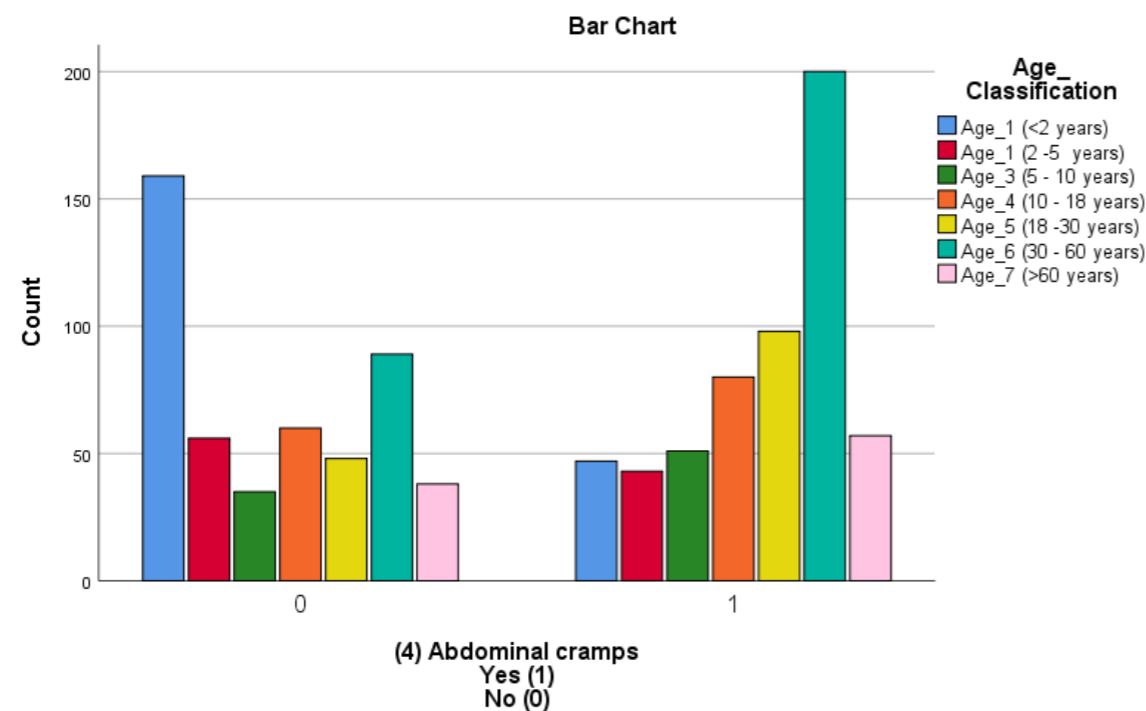

review only

**(5) Fever**  
**Yes (1)**  
**No (0) \* Age\_ Classification Crosstabulation**

|           |   | Age_ Classification |                   |                    |                     |                     |                     |                   | Total  |
|-----------|---|---------------------|-------------------|--------------------|---------------------|---------------------|---------------------|-------------------|--------|
|           |   | Age_1 (<2 years)    | Age_1 (2-5 years) | Age_3 (5-10 years) | Age_4 (10-18 years) | Age_5 (18-30 years) | Age_6 (30-60 years) | Age_7 (>60 years) |        |
| (5) Fever | 0 | Count               | 172               | 70                 | 55                  | 82                  | 103                 | 216               | 784    |
| Yes (1)   |   | % within (5) Fever  | 21.9%             | 8.9%               | 7.0%                | 10.5%               | 13.1%               | 27.6%             | 100.0% |
| No (0)    |   | Yes (1)             |                   |                    |                     |                     |                     |                   |        |
|           |   | No (0)              |                   |                    |                     |                     |                     |                   |        |

|       |                              |        |        |        |        |        |        |        |        |
|-------|------------------------------|--------|--------|--------|--------|--------|--------|--------|--------|
|       | % within Age_ Classification | 83.5%  | 70.7%  | 64.0%  | 58.6%  | 70.5%  | 74.7%  | 90.5%  | 73.9%  |
|       | % of Total                   | 16.2%  | 6.6%   | 5.2%   | 7.7%   | 9.7%   | 20.4%  | 8.1%   | 73.9%  |
| 1     | Count                        | 34     | 29     | 31     | 58     | 43     | 73     | 9      | 277    |
|       | % within (5) Fever           | 12.3%  | 10.5%  | 11.2%  | 20.9%  | 15.5%  | 26.4%  | 3.2%   | 100.0% |
|       | Yes (1)                      |        |        |        |        |        |        |        |        |
|       | No (0)                       |        |        |        |        |        |        |        |        |
|       | % within Age_ Classification | 16.5%  | 29.3%  | 36.0%  | 41.4%  | 29.5%  | 25.3%  | 9.5%   | 26.1%  |
|       | % of Total                   | 3.2%   | 2.7%   | 2.9%   | 5.5%   | 4.1%   | 6.9%   | 0.8%   | 26.1%  |
| Total | Count                        | 206    | 99     | 86     | 140    | 146    | 289    | 95     | 1061   |
|       | % within (5) Fever           | 19.4%  | 9.3%   | 8.1%   | 13.2%  | 13.8%  | 27.2%  | 9.0%   | 100.0% |
|       | Yes (1)                      |        |        |        |        |        |        |        |        |
|       | No (0)                       |        |        |        |        |        |        |        |        |
|       | % within Age_ Classification | 100.0% | 100.0% | 100.0% | 100.0% | 100.0% | 100.0% | 100.0% | 100.0% |
|       | % of Total                   | 19.4%  | 9.3%   | 8.1%   | 13.2%  | 13.8%  | 27.2%  | 9.0%   | 100.0% |

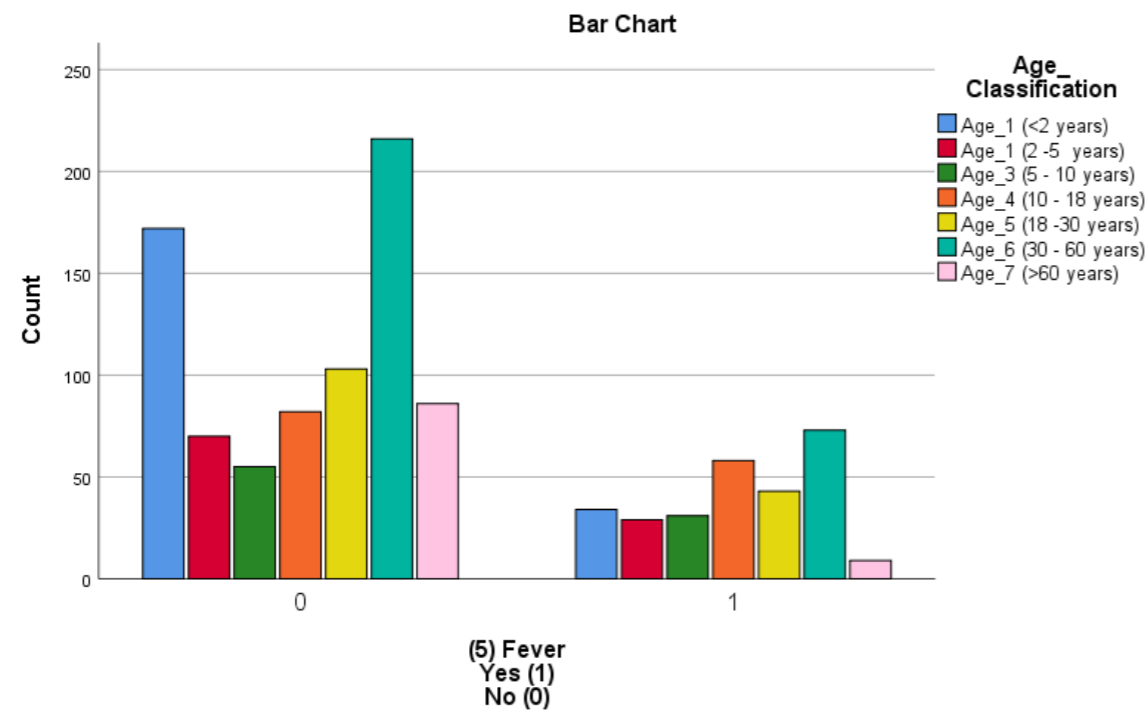

(6) Dehydration

Yes (1)

No (0) \* Age\_ Classification Crosstabulation

Age\_ Classification

Total

|                              |            | Age_1 (<2 years)             | Age_1 (2 -5 years)       | Age_3 (5 - 10 years) | Age_4 (10 - 18 years) | Age_5 (18 -30 years) | Age_6 (30 - 60 years) | Age_7 (>60 years) |        |        |        |
|------------------------------|------------|------------------------------|--------------------------|----------------------|-----------------------|----------------------|-----------------------|-------------------|--------|--------|--------|
| (6) Dehydration              | 0          | Count                        | 146                      | 71                   | 69                    | 111                  | 123                   | 210               | 64     | 794    |        |
|                              | Yes (1)    | % within (6) Dehydration     | 18.4%                    | 8.9%                 | 8.7%                  | 14.0%                | 15.5%                 | 26.4%             | 8.1%   | 100.0% |        |
|                              |            | No (0)                       | Yes (1)                  |                      |                       |                      |                       |                   |        |        |        |
|                              | No (0)     | No (0)                       |                          |                      |                       |                      |                       |                   |        |        |        |
|                              |            | % within Age_ Classification | 70.9%                    | 71.7%                | 80.2%                 | 79.3%                | 84.2%                 | 72.7%             | 67.4%  | 74.8%  |        |
|                              | % of Total |                              | 13.8%                    | 6.7%                 | 6.5%                  | 10.5%                | 11.6%                 | 19.8%             | 6.0%   | 74.8%  |        |
|                              | 1          | Count                        | 60                       | 28                   | 17                    | 29                   | 23                    | 79                | 31     | 267    |        |
|                              |            | Yes (1)                      | % within (6) Dehydration | 22.5%                | 10.5%                 | 6.4%                 | 10.9%                 | 8.6%              | 29.6%  | 11.6%  | 100.0% |
|                              |            |                              | No (0)                   | Yes (1)              |                       |                      |                       |                   |        |        |        |
|                              |            | No (0)                       | No (0)                   |                      |                       |                      |                       |                   |        |        |        |
| % within Age_ Classification |            |                              | 29.1%                    | 28.3%                | 19.8%                 | 20.7%                | 15.8%                 | 27.3%             | 32.6%  | 25.2%  |        |
| % of Total                   |            | 5.7%                         | 2.6%                     | 1.6%                 | 2.7%                  | 2.2%                 | 7.4%                  | 2.9%              | 25.2%  |        |        |
| Total                        | Count      | 206                          | 99                       | 86                   | 140                   | 146                  | 289                   | 95                | 1061   |        |        |
|                              | Yes (1)    | % within (6) Dehydration     | 19.4%                    | 9.3%                 | 8.1%                  | 13.2%                | 13.8%                 | 27.2%             | 9.0%   | 100.0% |        |
|                              |            | No (0)                       | Yes (1)                  |                      |                       |                      |                       |                   |        |        |        |
|                              | No (0)     | No (0)                       |                          |                      |                       |                      |                       |                   |        |        |        |
|                              |            | % within Age_ Classification | 100.0%                   | 100.0%               | 100.0%                | 100.0%               | 100.0%                | 100.0%            | 100.0% | 100.0% |        |
| % of Total                   |            | 19.4%                        | 9.3%                     | 8.1%                 | 13.2%                 | 13.8%                | 27.2%                 | 9.0%              | 100.0% |        |        |

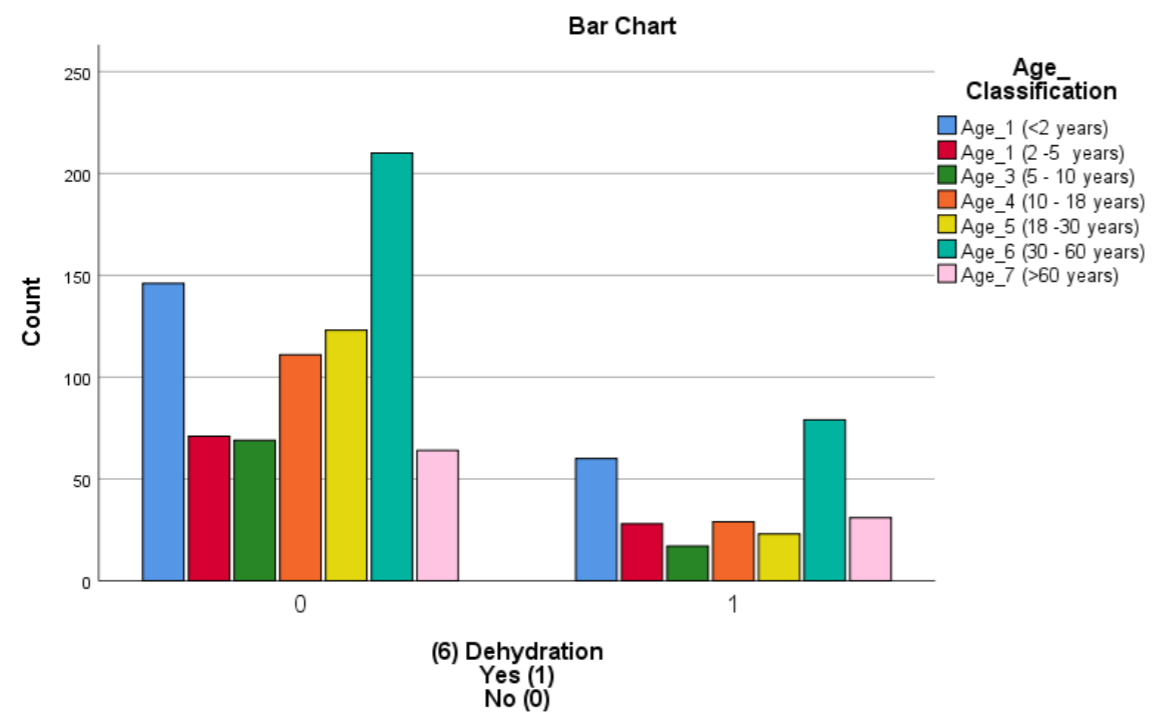



(7) Other  
Yes (1)  
No (0) \* Age\_ Classification Crosstabulation

|                                |            | Age_ Classification          |                    |                      |                       |                      |                       |                   | Total  |        |
|--------------------------------|------------|------------------------------|--------------------|----------------------|-----------------------|----------------------|-----------------------|-------------------|--------|--------|
|                                |            | Age_1 (<2 years)             | Age_1 (2 -5 years) | Age_3 (5 - 10 years) | Age_4 (10 - 18 years) | Age_5 (18 -30 years) | Age_6 (30 - 60 years) | Age_7 (>60 years) | Total  |        |
| (7) Other<br>Yes (1)<br>No (0) | 0          | Count                        | 196                | 98                   | 84                    | 118                  | 117                   | 234               | 75     | 922    |
|                                |            | % within (7) Other           | 21.3%              | 10.6%                | 9.1%                  | 12.8%                | 12.7%                 | 25.4%             | 8.1%   | 100.0% |
|                                |            | Yes (1)                      |                    |                      |                       |                      |                       |                   |        |        |
|                                |            | No (0)                       |                    |                      |                       |                      |                       |                   |        |        |
|                                |            | % within Age_ Classification | 95.1%              | 99.0%                | 97.7%                 | 84.3%                | 80.1%                 | 81.0%             | 78.9%  | 86.9%  |
|                                |            | % of Total                   | 18.5%              | 9.2%                 | 7.9%                  | 11.1%                | 11.0%                 | 22.1%             | 7.1%   | 86.9%  |
| 1                              |            | Count                        | 10                 | 1                    | 2                     | 22                   | 29                    | 55                | 20     | 139    |
|                                |            | % within (7) Other           | 7.2%               | 0.7%                 | 1.4%                  | 15.8%                | 20.9%                 | 39.6%             | 14.4%  | 100.0% |
|                                |            | Yes (1)                      |                    |                      |                       |                      |                       |                   |        |        |
|                                |            | No (0)                       |                    |                      |                       |                      |                       |                   |        |        |
|                                |            | % within Age_ Classification | 4.9%               | 1.0%                 | 2.3%                  | 15.7%                | 19.9%                 | 19.0%             | 21.1%  | 13.1%  |
|                                |            | % of Total                   | 0.9%               | 0.1%                 | 0.2%                  | 2.1%                 | 2.7%                  | 5.2%              | 1.9%   | 13.1%  |
| Total                          |            | Count                        | 206                | 99                   | 86                    | 140                  | 146                   | 289               | 95     | 1061   |
|                                |            | % within (7) Other           | 19.4%              | 9.3%                 | 8.1%                  | 13.2%                | 13.8%                 | 27.2%             | 9.0%   | 100.0% |
|                                |            | Yes (1)                      |                    |                      |                       |                      |                       |                   |        |        |
|                                |            | No (0)                       |                    |                      |                       |                      |                       |                   |        |        |
|                                |            | % within Age_ Classification | 100.0%             | 100.0%               | 100.0%                | 100.0%               | 100.0%                | 100.0%            | 100.0% | 100.0% |
|                                | % of Total | 19.4%                        | 9.3%               | 8.1%                 | 13.2%                 | 13.8%                | 27.2%                 | 9.0%              | 100.0% |        |

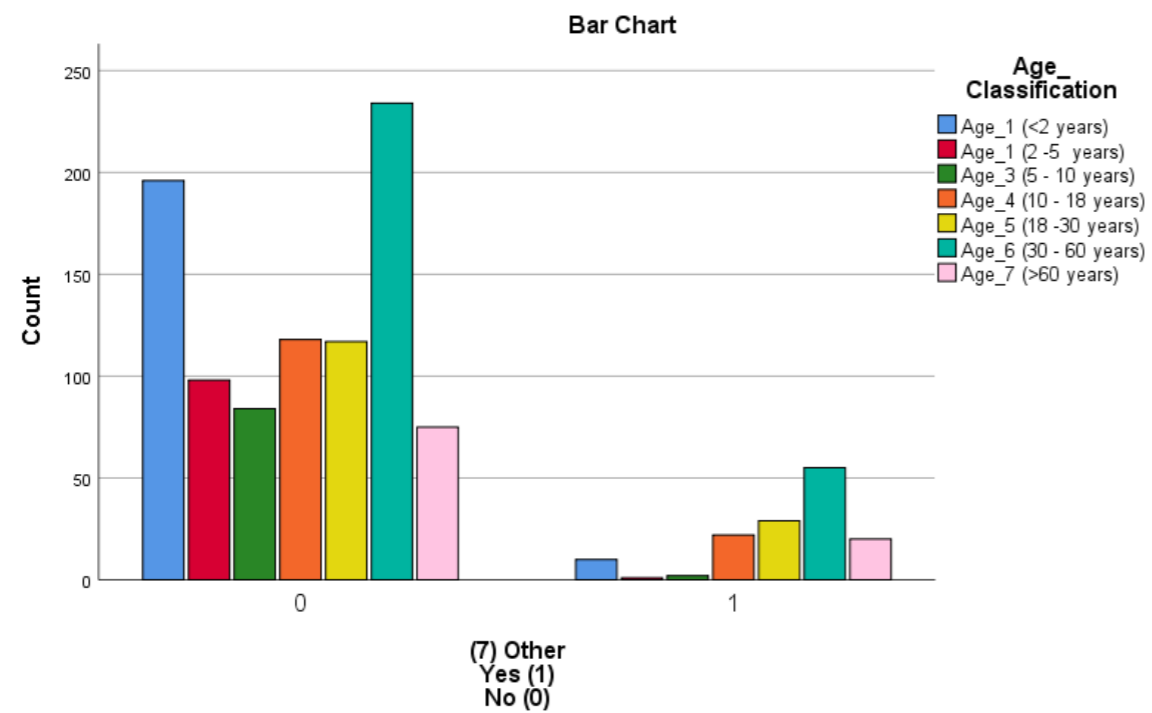

er rev...

severity of dehydration

(1) Severe (General Inspection: Lethargic, unconscious, floppy, Eyes: Sunken, dry, tears absent, Unable to drink, drinks poorly)

(2) Some (Restless, irritable, Sunken, tears absent, Thirsty, drinks eagerly)

(3) None (General Inspection Well, alert, Skin Pinch Normal, Eyes Normal, tears present, Tongue Moist, No thirst) \* Age\_ Classification Crosstabulation

|                         |   | Age_ Classification |                    |                      |                       |                      |                       |                   |       |     |
|-------------------------|---|---------------------|--------------------|----------------------|-----------------------|----------------------|-----------------------|-------------------|-------|-----|
|                         |   | Age_1 (<2 years)    | Age_1 (2 -5 years) | Age_3 (5 - 10 years) | Age_4 (10 - 18 years) | Age_5 (18 -30 years) | Age_6 (30 - 60 years) | Age_7 (>60 years) | Total |     |
| severity of dehydration | 1 | Count               | 41                 | 26                   | 11                    | 15                   | 11                    | 44                | 26    | 174 |

1  
2  
3  
4  
5  
6  
7  
8  
9  
10  
11  
12  
13  
14  
15  
16  
17  
18  
19  
20  
21  
22  
23  
24  
25  
26  
27  
28  
29  
30  
31  
32  
33  
34  
35  
36  
37  
38  
39  
40  
41  
42  
43  
44  
45  
46  
47  
48  
49  
50  
51  
52  
53  
54  
55  
56  
57  
58  
59  
60

|   |                                                                                                                                 |                                                                                                                                 |       |       |       |       |       |       |       |        |
|---|---------------------------------------------------------------------------------------------------------------------------------|---------------------------------------------------------------------------------------------------------------------------------|-------|-------|-------|-------|-------|-------|-------|--------|
|   | (1) Severe (General Inspection: Lethargic, unconscious, floppy, Eyes: Sunken, dry,tears absent, Unable to drink, drinks poorly) | % within severity of dehydration                                                                                                | 23.6% | 14.9% | 6.3%  | 8.6%  | 6.3%  | 25.3% | 14.9% | 100.0% |
|   | (2) Some (Restless, irritable, Sunken, tears absent, Thirsty, drinks eagerly)                                                   | (1) Severe (General Inspection: Lethargic, unconscious, floppy, Eyes: Sunken, dry,tears absent, Unable to drink, drinks poorly) |       |       |       |       |       |       |       |        |
|   | (3) None (General Inspection Well, alert, Skin Pinch Normal, Eyes Normal, tears present, Tongue Moist, No thirst)               | (2) Some (Restless, irritable, Sunken, tears absent, Thirsty, drinks eagerly)                                                   |       |       |       |       |       |       |       |        |
|   |                                                                                                                                 | (3) None (General Inspection Well, alert, Skin Pinch Normal, Eyes Normal, tears present, Tongue Moist, No thirst)               |       |       |       |       |       |       |       |        |
|   |                                                                                                                                 | % within Age_ Classification                                                                                                    | 21.6% | 27.7% | 13.8% | 11.4% | 8.0%  | 15.9% | 28.0% | 17.3%  |
|   |                                                                                                                                 | % of Total                                                                                                                      | 4.1%  | 2.6%  | 1.1%  | 1.5%  | 1.1%  | 4.4%  | 2.6%  | 17.3%  |
| 2 | Count                                                                                                                           |                                                                                                                                 | 90    | 37    | 34    | 64    | 59    | 164   | 59    | 507    |
|   | (1) Severe (General Inspection: Lethargic, unconscious, floppy, Eyes: Sunken, dry,tears absent, Unable to drink, drinks poorly) | % within severity of dehydration                                                                                                | 17.8% | 7.3%  | 6.7%  | 12.6% | 11.6% | 32.3% | 11.6% | 100.0% |
|   | (2) Some (Restless, irritable, Sunken, tears absent, Thirsty, drinks eagerly)                                                   | (1) Severe (General Inspection: Lethargic, unconscious, floppy, Eyes: Sunken, dry,tears absent, Unable to drink, drinks poorly) |       |       |       |       |       |       |       |        |
|   | (3) None (General Inspection Well, alert, Skin Pinch Normal, Eyes Normal, tears present, Tongue Moist, No thirst)               | (2) Some (Restless, irritable, Sunken, tears absent, Thirsty, drinks eagerly)                                                   |       |       |       |       |       |       |       |        |
|   |                                                                                                                                 | (3) None (General Inspection Well, alert, Skin Pinch Normal, Eyes Normal, tears present, Tongue Moist, No thirst)               |       |       |       |       |       |       |       |        |
|   |                                                                                                                                 | % within Age_ Classification                                                                                                    | 47.4% | 39.4% | 42.5% | 48.5% | 43.1% | 59.2% | 63.4% | 50.5%  |
|   |                                                                                                                                 | % of Total                                                                                                                      | 9.0%  | 3.7%  | 3.4%  | 6.4%  | 5.9%  | 16.4% | 5.9%  | 50.5%  |
| 3 | Count                                                                                                                           |                                                                                                                                 | 59    | 31    | 35    | 53    | 67    | 69    | 8     | 322    |

|       |                                                                                                                                          |        |        |        |        |        |        |        |        |
|-------|------------------------------------------------------------------------------------------------------------------------------------------|--------|--------|--------|--------|--------|--------|--------|--------|
|       | % within severity of dehydration                                                                                                         | 18.3%  | 9.6%   | 10.9%  | 16.5%  | 20.8%  | 21.4%  | 2.5%   | 100.0% |
|       | (1) Severe (General Inspection:<br>Lethargic, unconscious, floppy,<br>Eyes: Sunken, dry,tears absent,<br>Unable to drink, drinks poorly) |        |        |        |        |        |        |        |        |
|       | (2) Some (Restless, irritable,<br>Sunken, tears absent, Thirsty,<br>drinks eagerly)                                                      |        |        |        |        |        |        |        |        |
|       | (3) None (General Inspection<br>Well, alert, Skin Pinch Normal,<br>Eyes Normal, tears present,<br>Tongue Moist, No thirst)               |        |        |        |        |        |        |        |        |
|       | % within Age_ Classification                                                                                                             | 31.1%  | 33.0%  | 43.8%  | 40.2%  | 48.9%  | 24.9%  | 8.6%   | 32.1%  |
|       | % of Total                                                                                                                               | 5.9%   | 3.1%   | 3.5%   | 5.3%   | 6.7%   | 6.9%   | 0.8%   | 32.1%  |
| Total | Count                                                                                                                                    | 190    | 94     | 80     | 132    | 137    | 277    | 93     | 1003   |
|       | % within severity of dehydration                                                                                                         | 18.9%  | 9.4%   | 8.0%   | 13.2%  | 13.7%  | 27.6%  | 9.3%   | 100.0% |
|       | (1) Severe (General Inspection:<br>Lethargic, unconscious, floppy,<br>Eyes: Sunken, dry,tears absent,<br>Unable to drink, drinks poorly) |        |        |        |        |        |        |        |        |
|       | (2) Some (Restless, irritable,<br>Sunken, tears absent, Thirsty,<br>drinks eagerly)                                                      |        |        |        |        |        |        |        |        |
|       | (3) None (General Inspection<br>Well, alert, Skin Pinch Normal,<br>Eyes Normal, tears present,<br>Tongue Moist, No thirst)               |        |        |        |        |        |        |        |        |
|       | % within Age_ Classification                                                                                                             | 100.0% | 100.0% | 100.0% | 100.0% | 100.0% | 100.0% | 100.0% | 100.0% |
|       | % of Total                                                                                                                               | 18.9%  | 9.4%   | 8.0%   | 13.2%  | 13.7%  | 27.6%  | 9.3%   | 100.0% |

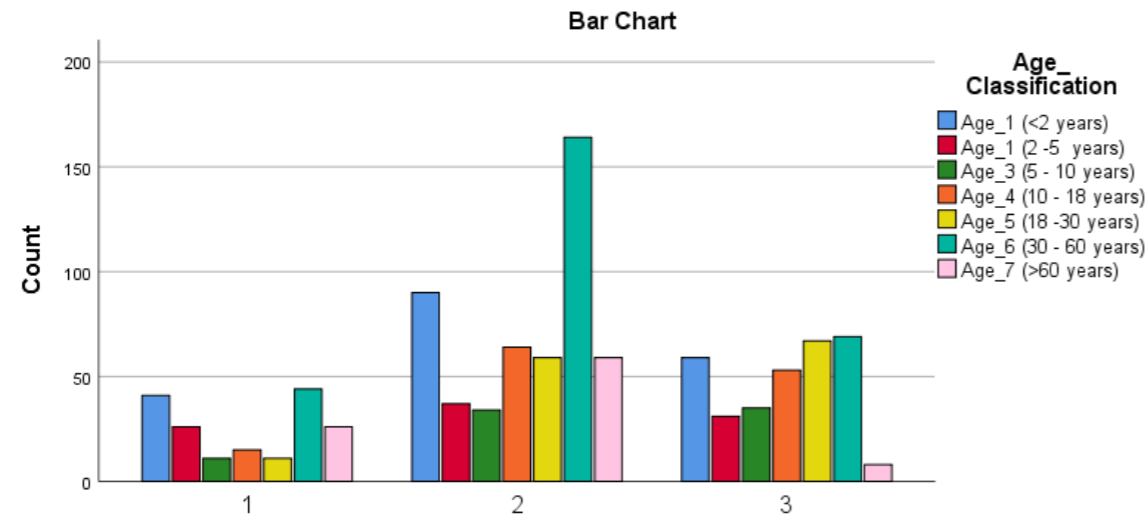

**severity of dehydration**  
**(1) Severe (General Inspection: Lethargic, unconscious, floppy, Eyes: Sunken, dry, tears absent, Unable to drink, drinks poorly)**  
**(2) Some (Restless, irritable, Sunken, tears absent, Thirsty, drinks eagerly)**  
**(3) None (General Inspection Well, alert, Skin Pinch Normal, Eyes Normal, tears present, Tongue Moist, No thirst)**

er review

**Hemoglobin (g/dL) Class**

- 1: Less than 10**
- 2: 10 - 12**
- 3: 12 - 17**

**4: more than 17 \* Age\_ Classification Crosstabulation**

|                         |   | Age_ Classification              |                   |                    |                     |                     |                     |                   | Total |        |
|-------------------------|---|----------------------------------|-------------------|--------------------|---------------------|---------------------|---------------------|-------------------|-------|--------|
|                         |   | Age_1 (<2 years)                 | Age_1 (2-5 years) | Age_3 (5-10 years) | Age_4 (10-18 years) | Age_5 (18-30 years) | Age_6 (30-60 years) | Age_7 (>60 years) |       |        |
| Hemoglobin (g/dL) Class | 1 | Count                            | 104               | 19                 | 10                  | 5                   | 15                  | 30                | 14    | 197    |
|                         |   | % within Hemoglobin (g/dL) Class | 52.8%             | 9.6%               | 5.1%                | 2.5%                | 7.6%                | 15.2%             | 7.1%  | 100.0% |
|                         | 2 | Count                            | 25                | 30                 | 23                  | 40                  | 41                  | 58                | 26    | 243    |
|                         |   | % within Age_ Classification     | 74.3%             | 29.7%              | 16.9%               | 4.6%                | 11.9%               | 11.5%             | 16.1% | 23.3%  |
|                         |   | % of Total                       | 12.3%             | 2.2%               | 1.2%                | 0.6%                | 1.8%                | 3.6%              | 1.7%  | 23.3%  |

|       |                              |        |        |        |        |        |        |        |        |
|-------|------------------------------|--------|--------|--------|--------|--------|--------|--------|--------|
|       | % within Hemoglobin (g/dL)   | 10.3%  | 12.3%  | 9.5%   | 16.5%  | 16.9%  | 23.9%  | 10.7%  | 100.0% |
|       | Class                        |        |        |        |        |        |        |        |        |
|       | 1: Less than 10              |        |        |        |        |        |        |        |        |
|       | 2: 10 - 12                   |        |        |        |        |        |        |        |        |
|       | 3: 12 - 17                   |        |        |        |        |        |        |        |        |
|       | 4: more than 17              |        |        |        |        |        |        |        |        |
|       | % within Age_ Classification | 17.9%  | 46.9%  | 39.0%  | 37.0%  | 32.5%  | 22.2%  | 29.9%  | 28.8%  |
|       | % of Total                   | 3.0%   | 3.6%   | 2.7%   | 4.7%   | 4.9%   | 6.9%   | 3.1%   | 28.8%  |
| 3     | Count                        | 11     | 15     | 25     | 61     | 67     | 163    | 45     | 387    |
|       | % within Hemoglobin (g/dL)   | 2.8%   | 3.9%   | 6.5%   | 15.8%  | 17.3%  | 42.1%  | 11.6%  | 100.0% |
|       | Class                        |        |        |        |        |        |        |        |        |
|       | 1: Less than 10              |        |        |        |        |        |        |        |        |
|       | 2: 10 - 12                   |        |        |        |        |        |        |        |        |
|       | 3: 12 - 17                   |        |        |        |        |        |        |        |        |
|       | 4: more than 17              |        |        |        |        |        |        |        |        |
|       | % within Age_ Classification | 7.9%   | 23.4%  | 42.4%  | 56.5%  | 53.2%  | 62.5%  | 51.7%  | 45.8%  |
|       | % of Total                   | 1.3%   | 1.8%   | 3.0%   | 7.2%   | 7.9%   | 19.3%  | 5.3%   | 45.8%  |
| 4     | Count                        | 0      | 0      | 1      | 2      | 3      | 10     | 2      | 18     |
|       | % within Hemoglobin (g/dL)   | 0.0%   | 0.0%   | 5.6%   | 11.1%  | 16.7%  | 55.6%  | 11.1%  | 100.0% |
|       | Class                        |        |        |        |        |        |        |        |        |
|       | 1: Less than 10              |        |        |        |        |        |        |        |        |
|       | 2: 10 - 12                   |        |        |        |        |        |        |        |        |
|       | 3: 12 - 17                   |        |        |        |        |        |        |        |        |
|       | 4: more than 17              |        |        |        |        |        |        |        |        |
|       | % within Age_ Classification | 0.0%   | 0.0%   | 1.7%   | 1.9%   | 2.4%   | 3.8%   | 2.3%   | 2.1%   |
|       | % of Total                   | 0.0%   | 0.0%   | 0.1%   | 0.2%   | 0.4%   | 1.2%   | 0.2%   | 2.1%   |
| Total | Count                        | 140    | 64     | 59     | 108    | 126    | 261    | 87     | 845    |
|       | % within Hemoglobin (g/dL)   | 16.6%  | 7.6%   | 7.0%   | 12.8%  | 14.9%  | 30.9%  | 10.3%  | 100.0% |
|       | Class                        |        |        |        |        |        |        |        |        |
|       | 1: Less than 10              |        |        |        |        |        |        |        |        |
|       | 2: 10 - 12                   |        |        |        |        |        |        |        |        |
|       | 3: 12 - 17                   |        |        |        |        |        |        |        |        |
|       | 4: more than 17              |        |        |        |        |        |        |        |        |
|       | % within Age_ Classification | 100.0% | 100.0% | 100.0% | 100.0% | 100.0% | 100.0% | 100.0% | 100.0% |
|       | % of Total                   | 16.6%  | 7.6%   | 7.0%   | 12.8%  | 14.9%  | 30.9%  | 10.3%  | 100.0% |

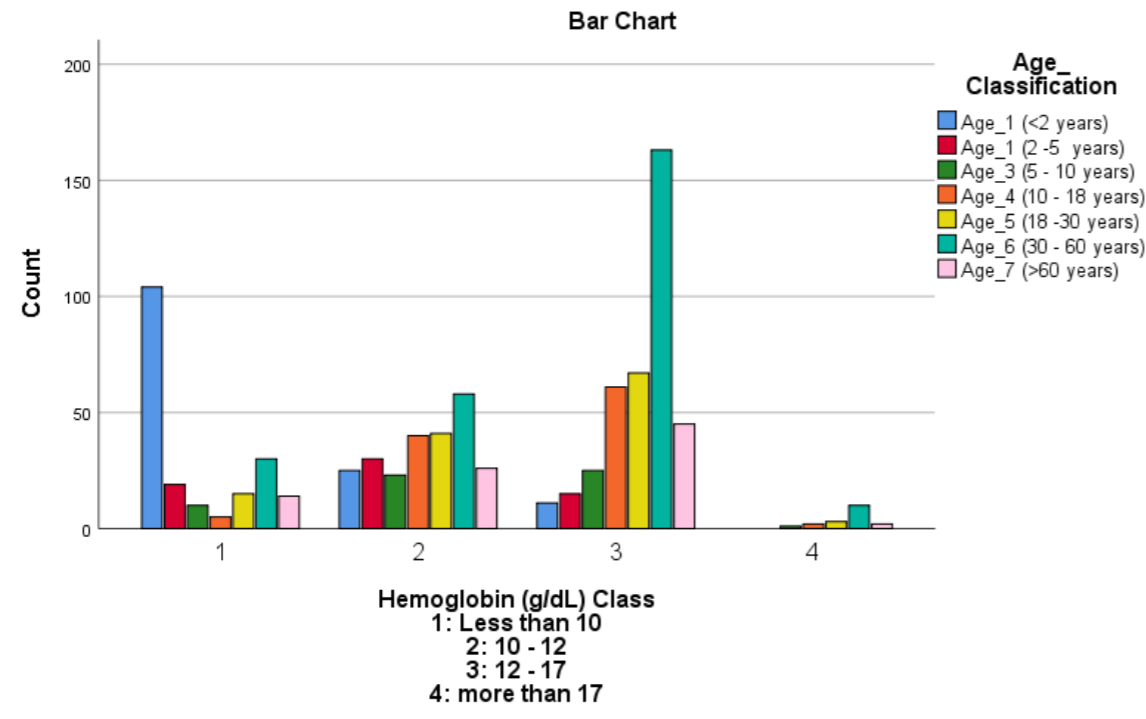

er review

**Platelet Classification**

- 1: Less than 15
- 2: 15 - 30
- 3: 30 - 50
- 4: 50 - 150
- 5: 150 - 450

**6: more than 450 \* Age Classification Crosstabulation**

|                         |   | Age Classification               |                    |                      |                       |                      |                       |                   |       |        |
|-------------------------|---|----------------------------------|--------------------|----------------------|-----------------------|----------------------|-----------------------|-------------------|-------|--------|
|                         |   | Age_1 (<2 years)                 | Age_1 (2 -5 years) | Age_3 (5 - 10 years) | Age_4 (10 - 18 years) | Age_5 (18 -30 years) | Age_6 (30 - 60 years) | Age_7 (>60 years) | Total |        |
| Platelet Classification | 1 | Count                            | 0                  | 0                    | 0                     | 1                    | 0                     | 1                 | 1     | 3      |
| 1: Less than 15         |   | % within Platelet Classification | 0.0%               | 0.0%                 | 0.0%                  | 33.3%                | 0.0%                  | 33.3%             | 33.3% | 100.0% |
| 2: 15 - 30              |   | 1: Less than 15                  |                    |                      |                       |                      |                       |                   |       |        |
| 3: 30 - 50              |   | 2: 15 - 30                       |                    |                      |                       |                      |                       |                   |       |        |
| 4: 50 - 150             |   | 3: 30 - 50                       |                    |                      |                       |                      |                       |                   |       |        |
| 5: 150 - 450            |   | 4: 50 - 150                      |                    |                      |                       |                      |                       |                   |       |        |
| 6: more than 450        |   | 5: 150 - 450                     |                    |                      |                       |                      |                       |                   |       |        |
|                         |   | 6: more than 450                 |                    |                      |                       |                      |                       |                   |       |        |
|                         |   | % within Age Classification      | 0.0%               | 0.0%                 | 0.0%                  | 1.0%                 | 0.0%                  | 0.4%              | 1.2%  | 0.4%   |

|   |                                   |       |      |       |       |       |       |       |        |
|---|-----------------------------------|-------|------|-------|-------|-------|-------|-------|--------|
|   | % of Total                        | 0.0%  | 0.0% | 0.0%  | 0.1%  | 0.0%  | 0.1%  | 0.1%  | 0.4%   |
| 2 | Count                             | 0     | 0    | 1     | 2     | 0     | 2     | 1     | 6      |
|   | % within Platelet_ Classification | 0.0%  | 0.0% | 16.7% | 33.3% | 0.0%  | 33.3% | 16.7% | 100.0% |
|   | 1: Less than 15                   |       |      |       |       |       |       |       |        |
|   | 2: 15 - 30                        |       |      |       |       |       |       |       |        |
|   | 3: 30 - 50                        |       |      |       |       |       |       |       |        |
|   | 4: 50 - 150                       |       |      |       |       |       |       |       |        |
|   | 5: 150 - 450                      |       |      |       |       |       |       |       |        |
|   | 6: more than 450                  |       |      |       |       |       |       |       |        |
|   | % within Age_ Classification      | 0.0%  | 0.0% | 1.8%  | 1.9%  | 0.0%  | 0.8%  | 1.2%  | 0.7%   |
|   | % of Total                        | 0.0%  | 0.0% | 0.1%  | 0.2%  | 0.0%  | 0.2%  | 0.1%  | 0.7%   |
| 3 | Count                             | 0     | 0    | 0     | 1     | 0     | 1     | 2     | 4      |
|   | % within Platelet_ Classification | 0.0%  | 0.0% | 0.0%  | 25.0% | 0.0%  | 25.0% | 50.0% | 100.0% |
|   | 1: Less than 15                   |       |      |       |       |       |       |       |        |
|   | 2: 15 - 30                        |       |      |       |       |       |       |       |        |
|   | 3: 30 - 50                        |       |      |       |       |       |       |       |        |
|   | 4: 50 - 150                       |       |      |       |       |       |       |       |        |
|   | 5: 150 - 450                      |       |      |       |       |       |       |       |        |
|   | 6: more than 450                  |       |      |       |       |       |       |       |        |
|   | % within Age_ Classification      | 0.0%  | 0.0% | 0.0%  | 1.0%  | 0.0%  | 0.4%  | 2.4%  | 0.5%   |
|   | % of Total                        | 0.0%  | 0.0% | 0.0%  | 0.1%  | 0.0%  | 0.1%  | 0.2%  | 0.5%   |
| 4 | Count                             | 4     | 3    | 2     | 8     | 10    | 17    | 6     | 50     |
|   | % within Platelet_ Classification | 8.0%  | 6.0% | 4.0%  | 16.0% | 20.0% | 34.0% | 12.0% | 100.0% |
|   | 1: Less than 15                   |       |      |       |       |       |       |       |        |
|   | 2: 15 - 30                        |       |      |       |       |       |       |       |        |
|   | 3: 30 - 50                        |       |      |       |       |       |       |       |        |
|   | 4: 50 - 150                       |       |      |       |       |       |       |       |        |
|   | 5: 150 - 450                      |       |      |       |       |       |       |       |        |
|   | 6: more than 450                  |       |      |       |       |       |       |       |        |
|   | % within Age_ Classification      | 2.9%  | 4.8% | 3.5%  | 7.7%  | 8.0%  | 6.8%  | 7.1%  | 6.1%   |
|   | % of Total                        | 0.5%  | 0.4% | 0.2%  | 1.0%  | 1.2%  | 2.1%  | 0.7%  | 6.1%   |
| 5 | Count                             | 84    | 41   | 40    | 79    | 106   | 215   | 71    | 636    |
|   | % within Platelet_ Classification | 13.2% | 6.4% | 6.3%  | 12.4% | 16.7% | 33.8% | 11.2% | 100.0% |
|   | 1: Less than 15                   |       |      |       |       |       |       |       |        |
|   | 2: 15 - 30                        |       |      |       |       |       |       |       |        |
|   | 3: 30 - 50                        |       |      |       |       |       |       |       |        |
|   | 4: 50 - 150                       |       |      |       |       |       |       |       |        |
|   | 5: 150 - 450                      |       |      |       |       |       |       |       |        |
|   | 6: more than 450                  |       |      |       |       |       |       |       |        |



1  
2  
3  
4  
5  
6  
7  
8  
9  
10  
11  
12  
13  
14  
15  
16  
17  
18  
19  
20  
21  
22  
23  
24  
25  
26  
27  
28  
29  
30  
31  
32  
33  
34  
35  
36  
37  
38  
39  
40  
41  
42  
43  
44  
45  
46  
47  
48  
49  
50  
51  
52  
53  
54  
55  
56  
57  
58  
59  
60

|       |                                   |        |        |        |        |        |        |        |        |
|-------|-----------------------------------|--------|--------|--------|--------|--------|--------|--------|--------|
|       | % within Age_ Classification      | 61.3%  | 65.1%  | 70.2%  | 76.0%  | 84.8%  | 86.0%  | 83.5%  | 77.5%  |
|       | % of Total                        | 10.2%  | 5.0%   | 4.9%   | 9.6%   | 12.9%  | 26.2%  | 8.6%   | 77.5%  |
| 6     | Count                             | 49     | 19     | 14     | 13     | 9      | 14     | 4      | 122    |
|       | % within Platelet_ Classification | 40.2%  | 15.6%  | 11.5%  | 10.7%  | 7.4%   | 11.5%  | 3.3%   | 100.0% |
|       | 1: Less than 15                   |        |        |        |        |        |        |        |        |
|       | 2: 15 - 30                        |        |        |        |        |        |        |        |        |
|       | 3: 30 - 50                        |        |        |        |        |        |        |        |        |
|       | 4: 50 - 150                       |        |        |        |        |        |        |        |        |
|       | 5: 150 - 450                      |        |        |        |        |        |        |        |        |
|       | 6: more than 450                  |        |        |        |        |        |        |        |        |
|       | % within Age_ Classification      | 35.8%  | 30.2%  | 24.6%  | 12.5%  | 7.2%   | 5.6%   | 4.7%   | 14.9%  |
|       | % of Total                        | 6.0%   | 2.3%   | 1.7%   | 1.6%   | 1.1%   | 1.7%   | 0.5%   | 14.9%  |
| Total | Count                             | 137    | 63     | 57     | 104    | 125    | 250    | 85     | 821    |
|       | % within Platelet_ Classification | 16.7%  | 7.7%   | 6.9%   | 12.7%  | 15.2%  | 30.5%  | 10.4%  | 100.0% |
|       | 1: Less than 15                   |        |        |        |        |        |        |        |        |
|       | 2: 15 - 30                        |        |        |        |        |        |        |        |        |
|       | 3: 30 - 50                        |        |        |        |        |        |        |        |        |
|       | 4: 50 - 150                       |        |        |        |        |        |        |        |        |
|       | 5: 150 - 450                      |        |        |        |        |        |        |        |        |
|       | 6: more than 450                  |        |        |        |        |        |        |        |        |
|       | % within Age_ Classification      | 100.0% | 100.0% | 100.0% | 100.0% | 100.0% | 100.0% | 100.0% | 100.0% |
|       | % of Total                        | 16.7%  | 7.7%   | 6.9%   | 12.7%  | 15.2%  | 30.5%  | 10.4%  | 100.0% |

view only

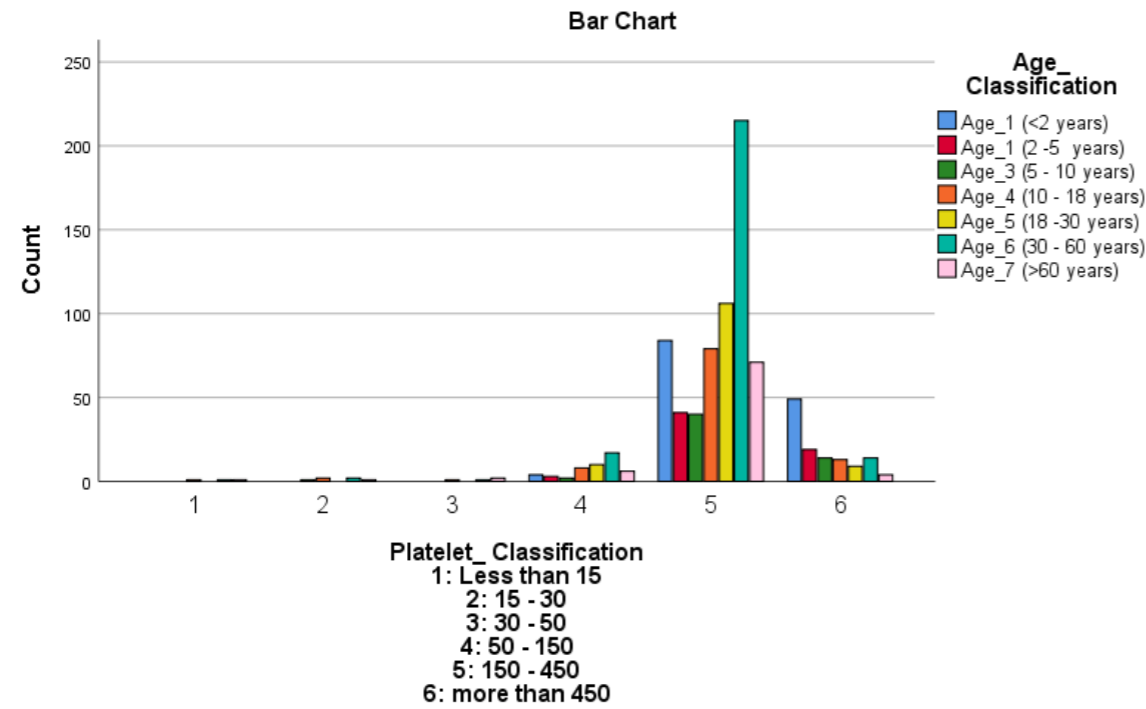

**Serum Creatinine Classification**

**1: less than 0.6**

**2: 0.6 - 1.3**

**3: more than 1.3 \* Age Classification Crosstabulation**

|                                 |                  | Age Classification                       |                   |                    |                     |                     |                     |                   |       |        |
|---------------------------------|------------------|------------------------------------------|-------------------|--------------------|---------------------|---------------------|---------------------|-------------------|-------|--------|
|                                 |                  | Age_1 (<2 years)                         | Age_1 (2-5 years) | Age_3 (5-10 years) | Age_4 (10-18 years) | Age_5 (18-30 years) | Age_6 (30-60 years) | Age_7 (>60 years) | Total |        |
| Serum Creatinine Classification | 1                | Count                                    | 93                | 40                 | 28                  | 48                  | 41                  | 54                | 7     | 311    |
|                                 | 1: less than 0.6 | % within Serum Creatinine Classification | 29.9%             | 12.9%              | 9.0%                | 15.4%               | 13.2%               | 17.4%             | 2.3%  | 100.0% |
|                                 | 2: 0.6 - 1.3     |                                          |                   |                    |                     |                     |                     |                   |       |        |
|                                 | 3: more than 1.3 |                                          |                   |                    |                     |                     |                     |                   |       |        |
|                                 |                  | % within Age Classification              | 68.9%             | 65.6%              | 53.8%               | 44.0%               | 36.0%               | 20.9%             | 8.4%  | 38.3%  |
|                                 |                  | % of Total                               | 11.5%             | 4.9%               | 3.4%                | 5.9%                | 5.0%                | 6.7%              | 0.9%  | 38.3%  |
|                                 | 2                | Count                                    | 34                | 14                 | 16                  | 50                  | 63                  | 135               | 32    | 344    |

|       |                             |        |        |        |        |        |        |        |        |
|-------|-----------------------------|--------|--------|--------|--------|--------|--------|--------|--------|
|       | % within Serum              | 9.9%   | 4.1%   | 4.7%   | 14.5%  | 18.3%  | 39.2%  | 9.3%   | 100.0% |
|       | Creatinine_Classification   |        |        |        |        |        |        |        |        |
|       | 1: less than 0.6            |        |        |        |        |        |        |        |        |
|       | 2: 0.6 - 1.3                |        |        |        |        |        |        |        |        |
|       | 3: more than 1.3            |        |        |        |        |        |        |        |        |
|       | % within Age_Classification | 25.2%  | 23.0%  | 30.8%  | 45.9%  | 55.3%  | 52.3%  | 38.6%  | 42.4%  |
|       | % of Total                  | 4.2%   | 1.7%   | 2.0%   | 6.2%   | 7.8%   | 16.6%  | 3.9%   | 42.4%  |
| 3     | Count                       | 8      | 7      | 8      | 11     | 10     | 69     | 44     | 157    |
|       | % within Serum              | 5.1%   | 4.5%   | 5.1%   | 7.0%   | 6.4%   | 43.9%  | 28.0%  | 100.0% |
|       | Creatinine_Classification   |        |        |        |        |        |        |        |        |
|       | 1: less than 0.6            |        |        |        |        |        |        |        |        |
|       | 2: 0.6 - 1.3                |        |        |        |        |        |        |        |        |
|       | 3: more than 1.3            |        |        |        |        |        |        |        |        |
|       | % within Age_Classification | 5.9%   | 11.5%  | 15.4%  | 10.1%  | 8.8%   | 26.7%  | 53.0%  | 19.3%  |
|       | % of Total                  | 1.0%   | 0.9%   | 1.0%   | 1.4%   | 1.2%   | 8.5%   | 5.4%   | 19.3%  |
| Total | Count                       | 135    | 61     | 52     | 109    | 114    | 258    | 83     | 812    |
|       | % within Serum              | 16.6%  | 7.5%   | 6.4%   | 13.4%  | 14.0%  | 31.8%  | 10.2%  | 100.0% |
|       | Creatinine_Classification   |        |        |        |        |        |        |        |        |
|       | 1: less than 0.6            |        |        |        |        |        |        |        |        |
|       | 2: 0.6 - 1.3                |        |        |        |        |        |        |        |        |
|       | 3: more than 1.3            |        |        |        |        |        |        |        |        |
|       | % within Age_Classification | 100.0% | 100.0% | 100.0% | 100.0% | 100.0% | 100.0% | 100.0% | 100.0% |
|       | % of Total                  | 16.6%  | 7.5%   | 6.4%   | 13.4%  | 14.0%  | 31.8%  | 10.2%  | 100.0% |

only

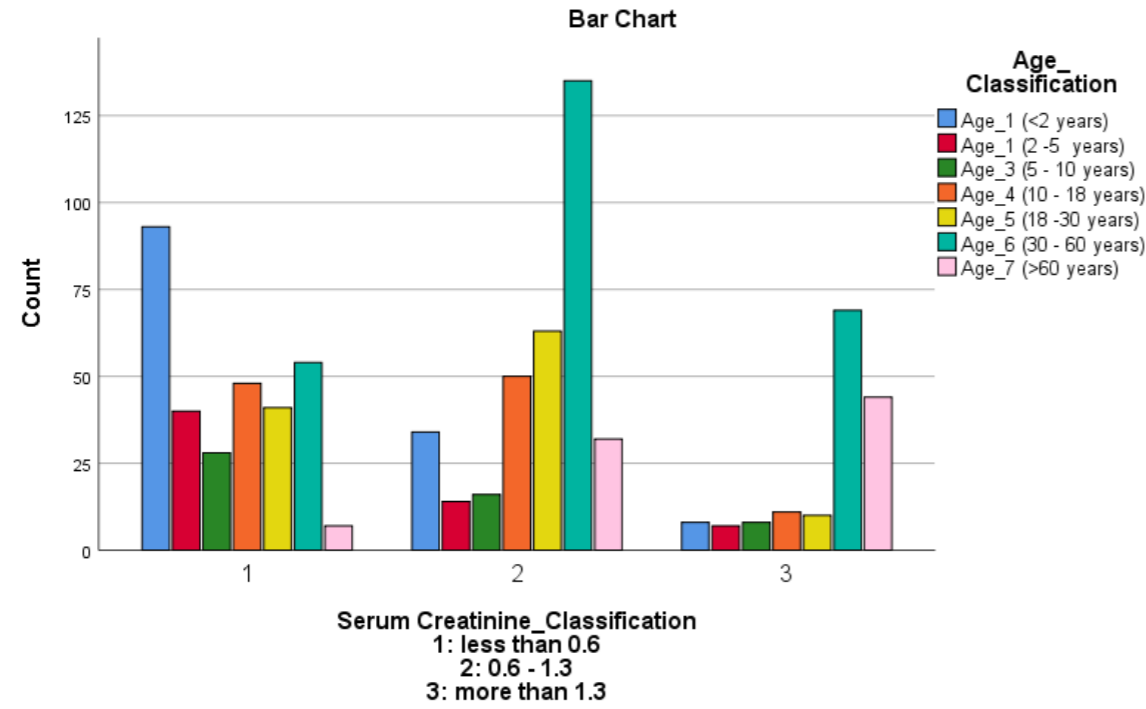

**Urea\_Class**

**1: 10 - 50**

**2: more than 50 \* Age\_ Classification Crosstabulation**

|                                             |                               | Age_ Classification          |                   |                    |                     |                     |                     |                   | Total  |        |
|---------------------------------------------|-------------------------------|------------------------------|-------------------|--------------------|---------------------|---------------------|---------------------|-------------------|--------|--------|
|                                             |                               | Age_1 (<2 years)             | Age_1 (2-5 years) | Age_3 (5-10 years) | Age_4 (10-18 years) | Age_5 (18-30 years) | Age_6 (30-60 years) | Age_7 (>60 years) |        |        |
| Urea_Class<br>1: 10 - 50<br>2: more than 50 | 1                             | Count                        | 113               | 42                 | 36                  | 90                  | 110                 | 208               | 40     | 639    |
|                                             |                               | % within Urea_Class          | 17.7%             | 6.6%               | 5.6%                | 14.1%               | 17.2%               | 32.6%             | 6.3%   | 100.0% |
|                                             |                               | 2: more than 50              |                   |                    |                     |                     |                     |                   |        |        |
|                                             |                               | % within Age_ Classification | 81.9%             | 68.9%              | 70.6%               | 84.1%               | 94.0%               | 79.1%             | 47.6%  | 77.8%  |
|                                             |                               | % of Total                   | 13.8%             | 5.1%               | 4.4%                | 11.0%               | 13.4%               | 25.3%             | 4.9%   | 77.8%  |
|                                             |                               | 2                            | Count             | 25                 | 19                  | 15                  | 17                  | 7                 | 55     | 44     |
|                                             | % within Urea_Class           | 13.7%                        | 10.4%             | 8.2%               | 9.3%                | 3.8%                | 30.2%               | 24.2%             | 100.0% |        |
|                                             | 1: 10 - 50<br>2: more than 50 |                              |                   |                    |                     |                     |                     |                   |        |        |
|                                             | % within Age_ Classification  | 18.1%                        | 31.1%             | 29.4%              | 15.9%               | 6.0%                | 20.9%               | 52.4%             | 22.2%  |        |
|                                             | % of Total                    | 3.0%                         | 2.3%              | 1.8%               | 2.1%                | 0.9%                | 6.7%                | 5.4%              | 22.2%  |        |
| <b>Total</b>                                | Count                         | 138                          | 61                | 51                 | 107                 | 117                 | 263                 | 84                | 821    |        |

|                              |        |        |        |        |        |        |        |        |
|------------------------------|--------|--------|--------|--------|--------|--------|--------|--------|
| % within Urea_Class          | 16.8%  | 7.4%   | 6.2%   | 13.0%  | 14.3%  | 32.0%  | 10.2%  | 100.0% |
| 1: 10 - 50                   |        |        |        |        |        |        |        |        |
| 2: more than 50              |        |        |        |        |        |        |        |        |
| % within Age_ Classification | 100.0% | 100.0% | 100.0% | 100.0% | 100.0% | 100.0% | 100.0% | 100.0% |
| % of Total                   | 16.8%  | 7.4%   | 6.2%   | 13.0%  | 14.3%  | 32.0%  | 10.2%  | 100.0% |

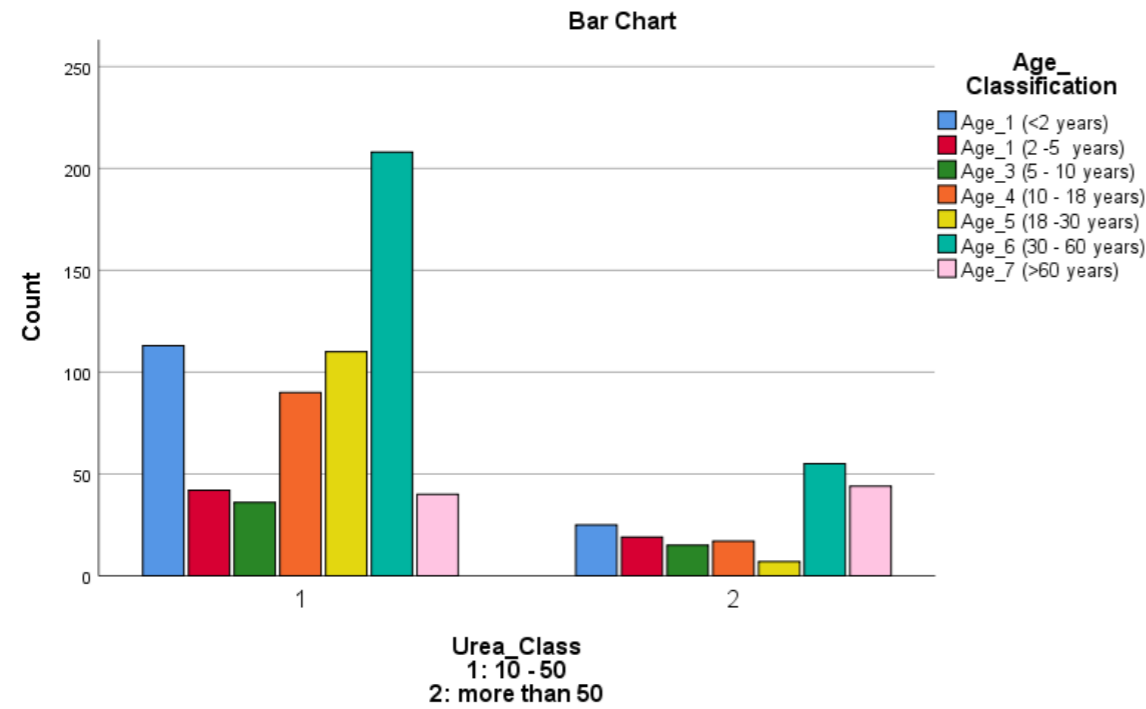

review only

**WBC\_Class**  
1: less than 4.5  
2: 4.5 - 10  
3: more than 10 \* Age\_ Classification Crosstabulation

| WBC_Class                    | Count | Age_ Classification |                     |                      |                       |                       |                       |                   | Total  |
|------------------------------|-------|---------------------|---------------------|----------------------|-----------------------|-----------------------|-----------------------|-------------------|--------|
|                              |       | Age_1 (<2 years)    | Age_1 (2 - 5 years) | Age_3 (5 - 10 years) | Age_4 (10 - 18 years) | Age_5 (18 - 30 years) | Age_6 (30 - 60 years) | Age_7 (>60 years) |        |
| 1: less than 4.5             | 34    | 4                   | 2                   | 3                    | 6                     | 5                     | 12                    | 2                 | 34     |
| 2: 4.5 - 10                  |       |                     |                     |                      |                       |                       |                       |                   |        |
| 3: more than 10              |       |                     |                     |                      |                       |                       |                       |                   |        |
| % within WBC_Class           |       | 11.8%               | 5.9%                | 8.8%                 | 17.6%                 | 14.7%                 | 35.3%                 | 5.9%              | 100.0% |
| % within Age_ Classification |       | 3.6%                | 4.1%                | 5.8%                 | 6.6%                  | 4.4%                  | 4.8%                  | 2.5%              | 4.6%   |

|       |   |                             |        |        |        |        |        |        |        |        |
|-------|---|-----------------------------|--------|--------|--------|--------|--------|--------|--------|--------|
|       |   | % of Total                  | 0.5%   | 0.3%   | 0.4%   | 0.8%   | 0.7%   | 1.6%   | 0.3%   | 4.6%   |
|       | 2 | Count                       | 32     | 17     | 14     | 34     | 65     | 107    | 26     | 295    |
|       |   | % within WBC_Class          | 10.8%  | 5.8%   | 4.7%   | 11.5%  | 22.0%  | 36.3%  | 8.8%   | 100.0% |
|       |   | 1: less than 4.5            |        |        |        |        |        |        |        |        |
|       |   | 2: 4.5 - 10                 |        |        |        |        |        |        |        |        |
|       |   | 3: more than 10             |        |        |        |        |        |        |        |        |
|       |   | % within Age_Classification | 29.1%  | 34.7%  | 26.9%  | 37.4%  | 57.0%  | 43.0%  | 32.9%  | 39.7%  |
|       |   | % of Total                  | 4.3%   | 2.3%   | 1.9%   | 4.6%   | 8.7%   | 14.4%  | 3.5%   | 39.7%  |
|       | 3 | Count                       | 74     | 30     | 35     | 51     | 44     | 130    | 51     | 415    |
|       |   | % within WBC_Class          | 17.8%  | 7.2%   | 8.4%   | 12.3%  | 10.6%  | 31.3%  | 12.3%  | 100.0% |
|       |   | 1: less than 4.5            |        |        |        |        |        |        |        |        |
|       |   | 2: 4.5 - 10                 |        |        |        |        |        |        |        |        |
|       |   | 3: more than 10             |        |        |        |        |        |        |        |        |
|       |   | % within Age_Classification | 67.3%  | 61.2%  | 67.3%  | 56.0%  | 38.6%  | 52.2%  | 64.6%  | 55.8%  |
|       |   | % of Total                  | 9.9%   | 4.0%   | 4.7%   | 6.9%   | 5.9%   | 17.5%  | 6.9%   | 55.8%  |
| Total |   | Count                       | 110    | 49     | 52     | 91     | 114    | 249    | 79     | 744    |
|       |   | % within WBC_Class          | 14.8%  | 6.6%   | 7.0%   | 12.2%  | 15.3%  | 33.5%  | 10.6%  | 100.0% |
|       |   | 1: less than 4.5            |        |        |        |        |        |        |        |        |
|       |   | 2: 4.5 - 10                 |        |        |        |        |        |        |        |        |
|       |   | 3: more than 10             |        |        |        |        |        |        |        |        |
|       |   | % within Age_Classification | 100.0% | 100.0% | 100.0% | 100.0% | 100.0% | 100.0% | 100.0% | 100.0% |
|       |   | % of Total                  | 14.8%  | 6.6%   | 7.0%   | 12.2%  | 15.3%  | 33.5%  | 10.6%  | 100.0% |

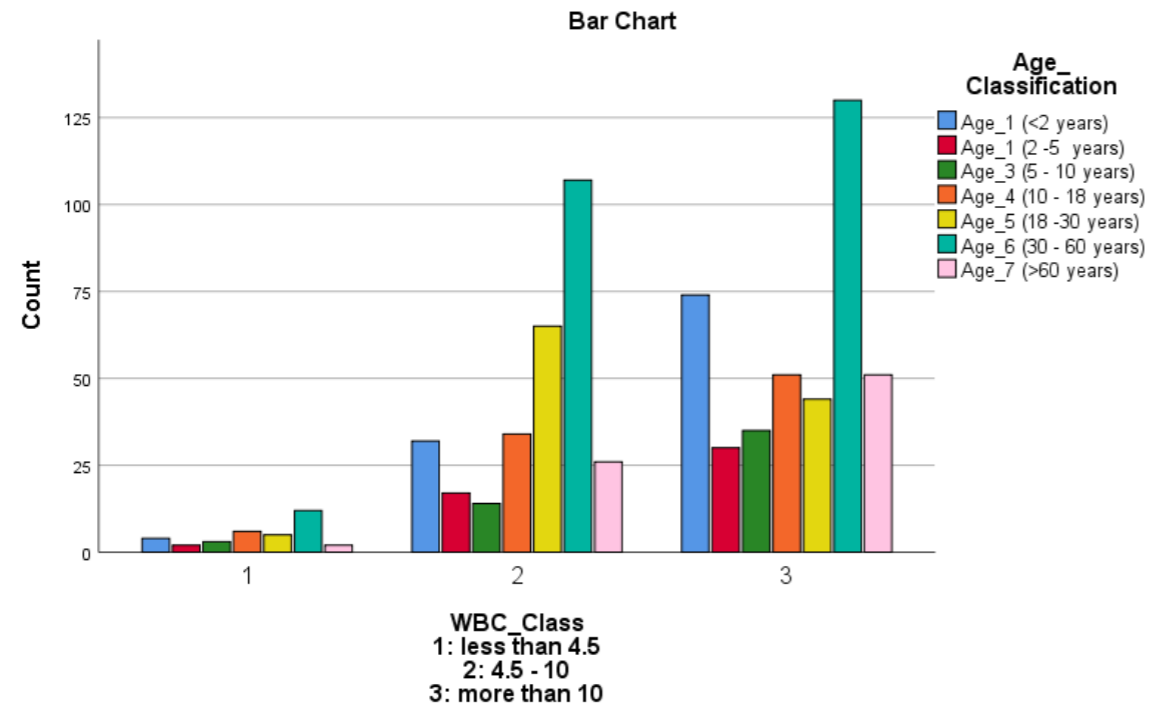

er review

**RandomGlucose\_Class**

1: less than 70  
2: 70 - 120  
3: 120 - 200  
4: more than 200

**4: more than 200 \* Age Classification Crosstabulation**

|                     |                  | Age Classification           |                   |                    |                     |                     |                     |                   |       |        |
|---------------------|------------------|------------------------------|-------------------|--------------------|---------------------|---------------------|---------------------|-------------------|-------|--------|
|                     |                  | Age_1 (<2 years)             | Age_1 (2-5 years) | Age_3 (5-10 years) | Age_4 (10-18 years) | Age_5 (18-30 years) | Age_6 (30-60 years) | Age_7 (>60 years) | Total |        |
| RandomGlucose_Class | 1                | Count                        | 7                 | 1                  | 1                   | 4                   | 6                   | 9                 | 4     | 32     |
|                     |                  | % within RandomGlucose_Class | 21.9%             | 3.1%               | 3.1%                | 12.5%               | 18.8%               | 28.1%             | 12.5% | 100.0% |
|                     | 1: less than 70  |                              |                   |                    |                     |                     |                     |                   |       |        |
|                     | 2: 70 - 120      |                              |                   |                    |                     |                     |                     |                   |       |        |
|                     | 3: 120 - 200     |                              |                   |                    |                     |                     |                     |                   |       |        |
|                     | 4: more than 200 |                              |                   |                    |                     |                     |                     |                   |       |        |
|                     |                  | % within Age Classification  | 13.5%             | 5.0%               | 6.7%                | 5.6%                | 5.6%                | 3.8%              | 5.1%  | 5.5%   |
|                     |                  | % of Total                   | 1.2%              | 0.2%               | 0.2%                | 0.7%                | 1.0%                | 1.6%              | 0.7%  | 5.5%   |
|                     | 2                | Count                        | 29                | 10                 | 10                  | 56                  | 93                  | 134               | 33    | 365    |

|  |       |                              |        |        |        |        |        |        |        |        |
|--|-------|------------------------------|--------|--------|--------|--------|--------|--------|--------|--------|
|  |       | % within RandomGlucose_Class | 7.9%   | 2.7%   | 2.7%   | 15.3%  | 25.5%  | 36.7%  | 9.0%   | 100.0% |
|  |       | 1: less than 70              |        |        |        |        |        |        |        |        |
|  |       | 2: 70 - 120                  |        |        |        |        |        |        |        |        |
|  |       | 3: 120 - 200                 |        |        |        |        |        |        |        |        |
|  |       | 4: more than 200             |        |        |        |        |        |        |        |        |
|  |       | % within Age_Classification  | 55.8%  | 50.0%  | 66.7%  | 77.8%  | 86.1%  | 57.3%  | 42.3%  | 63.0%  |
|  |       | % of Total                   | 5.0%   | 1.7%   | 1.7%   | 9.7%   | 16.1%  | 23.1%  | 5.7%   | 63.0%  |
|  | 3     | Count                        | 15     | 7      | 4      | 11     | 8      | 74     | 31     | 150    |
|  |       | % within RandomGlucose_Class | 10.0%  | 4.7%   | 2.7%   | 7.3%   | 5.3%   | 49.3%  | 20.7%  | 100.0% |
|  |       | 1: less than 70              |        |        |        |        |        |        |        |        |
|  |       | 2: 70 - 120                  |        |        |        |        |        |        |        |        |
|  |       | 3: 120 - 200                 |        |        |        |        |        |        |        |        |
|  |       | 4: more than 200             |        |        |        |        |        |        |        |        |
|  |       | % within Age_Classification  | 28.8%  | 35.0%  | 26.7%  | 15.3%  | 7.4%   | 31.6%  | 39.7%  | 25.9%  |
|  |       | % of Total                   | 2.6%   | 1.2%   | 0.7%   | 1.9%   | 1.4%   | 12.8%  | 5.4%   | 25.9%  |
|  | 4     | Count                        | 1      | 2      | 0      | 1      | 1      | 17     | 10     | 32     |
|  |       | % within RandomGlucose_Class | 3.1%   | 6.3%   | 0.0%   | 3.1%   | 3.1%   | 53.1%  | 31.3%  | 100.0% |
|  |       | 1: less than 70              |        |        |        |        |        |        |        |        |
|  |       | 2: 70 - 120                  |        |        |        |        |        |        |        |        |
|  |       | 3: 120 - 200                 |        |        |        |        |        |        |        |        |
|  |       | 4: more than 200             |        |        |        |        |        |        |        |        |
|  |       | % within Age_Classification  | 1.9%   | 10.0%  | 0.0%   | 1.4%   | 0.9%   | 7.3%   | 12.8%  | 5.5%   |
|  |       | % of Total                   | 0.2%   | 0.3%   | 0.0%   | 0.2%   | 0.2%   | 2.9%   | 1.7%   | 5.5%   |
|  | Total | Count                        | 52     | 20     | 15     | 72     | 108    | 234    | 78     | 579    |
|  |       | % within RandomGlucose_Class | 9.0%   | 3.5%   | 2.6%   | 12.4%  | 18.7%  | 40.4%  | 13.5%  | 100.0% |
|  |       | 1: less than 70              |        |        |        |        |        |        |        |        |
|  |       | 2: 70 - 120                  |        |        |        |        |        |        |        |        |
|  |       | 3: 120 - 200                 |        |        |        |        |        |        |        |        |
|  |       | 4: more than 200             |        |        |        |        |        |        |        |        |
|  |       | % within Age_Classification  | 100.0% | 100.0% | 100.0% | 100.0% | 100.0% | 100.0% | 100.0% | 100.0% |
|  |       | % of Total                   | 9.0%   | 3.5%   | 2.6%   | 12.4%  | 18.7%  | 40.4%  | 13.5%  | 100.0% |



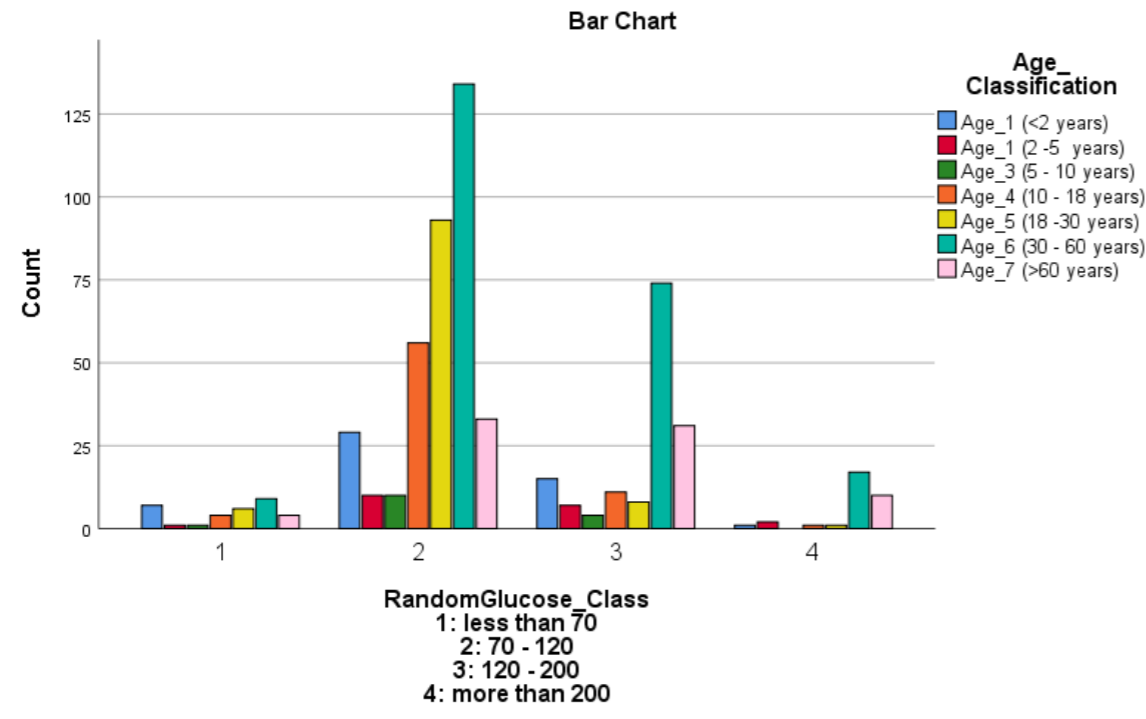

**serum potassium Classification**

**1: less than 3.5**

**2: 3.5 - 5**

**3: more than 5 \* Age\_ Classification Crosstabulation**

|                                |                  | Age_ Classification                     |                   |                    |                     |                     |                     |                   |       |        |
|--------------------------------|------------------|-----------------------------------------|-------------------|--------------------|---------------------|---------------------|---------------------|-------------------|-------|--------|
|                                |                  | Age_1 (<2 years)                        | Age_1 (2-5 years) | Age_3 (5-10 years) | Age_4 (10-18 years) | Age_5 (18-30 years) | Age_6 (30-60 years) | Age_7 (>60 years) | Total |        |
| serum potassium Classification | 1                | Count                                   | 59                | 34                 | 21                  | 23                  | 37                  | 65                | 31    | 270    |
|                                | 1: less than 3.5 | % within serum potassium Classification | 21.9%             | 12.6%              | 7.8%                | 8.5%                | 13.7%               | 24.1%             | 11.5% | 100.0% |
|                                | 2: 3.5 - 5       | Count                                   | 71                | 25                 | 31                  | 82                  | 86                  | 171               | 50    | 516    |
|                                | 3: more than 5   | % within Age_ Classification            | 43.4%             | 55.7%              | 40.4%               | 21.9%               | 29.8%               | 25.8%             | 35.6% | 33.0%  |
|                                |                  | % of Total                              | 7.2%              | 4.2%               | 2.6%                | 2.8%                | 4.5%                | 8.0%              | 3.8%  | 33.0%  |

|       |                                         |        |        |        |        |        |        |        |        |  |
|-------|-----------------------------------------|--------|--------|--------|--------|--------|--------|--------|--------|--|
|       | % within serum potassium Classification |        |        |        |        |        |        |        |        |  |
|       | 1: less than 3.5                        | 13.8%  | 4.8%   | 6.0%   | 15.9%  | 16.7%  | 33.1%  | 9.7%   | 100.0% |  |
|       | 2: 3.5 - 5                              |        |        |        |        |        |        |        |        |  |
|       | 3: more than 5                          |        |        |        |        |        |        |        |        |  |
|       | % within Age_ Classification            | 52.2%  | 41.0%  | 59.6%  | 78.1%  | 69.4%  | 67.9%  | 57.5%  | 63.2%  |  |
|       | % of Total                              | 8.7%   | 3.1%   | 3.8%   | 10.0%  | 10.5%  | 20.9%  | 6.1%   | 63.2%  |  |
| 3     | Count                                   | 6      | 2      | 0      | 0      | 1      | 16     | 6      | 31     |  |
|       | % within serum potassium Classification |        |        |        |        |        |        |        |        |  |
|       | 1: less than 3.5                        | 19.4%  | 6.5%   | 0.0%   | 0.0%   | 3.2%   | 51.6%  | 19.4%  | 100.0% |  |
|       | 2: 3.5 - 5                              |        |        |        |        |        |        |        |        |  |
|       | 3: more than 5                          |        |        |        |        |        |        |        |        |  |
|       | % within Age_ Classification            | 4.4%   | 3.3%   | 0.0%   | 0.0%   | 0.8%   | 6.3%   | 6.9%   | 3.8%   |  |
|       | % of Total                              | 0.7%   | 0.2%   | 0.0%   | 0.0%   | 0.1%   | 2.0%   | 0.7%   | 3.8%   |  |
| Total | Count                                   | 136    | 61     | 52     | 105    | 124    | 252    | 87     | 817    |  |
|       | % within serum potassium Classification |        |        |        |        |        |        |        |        |  |
|       | 1: less than 3.5                        | 16.6%  | 7.5%   | 6.4%   | 12.9%  | 15.2%  | 30.8%  | 10.6%  | 100.0% |  |
|       | 2: 3.5 - 5                              |        |        |        |        |        |        |        |        |  |
|       | 3: more than 5                          |        |        |        |        |        |        |        |        |  |
|       | % within Age_ Classification            | 100.0% | 100.0% | 100.0% | 100.0% | 100.0% | 100.0% | 100.0% | 100.0% |  |
|       | % of Total                              | 16.6%  | 7.5%   | 6.4%   | 12.9%  | 15.2%  | 30.8%  | 10.6%  | 100.0% |  |

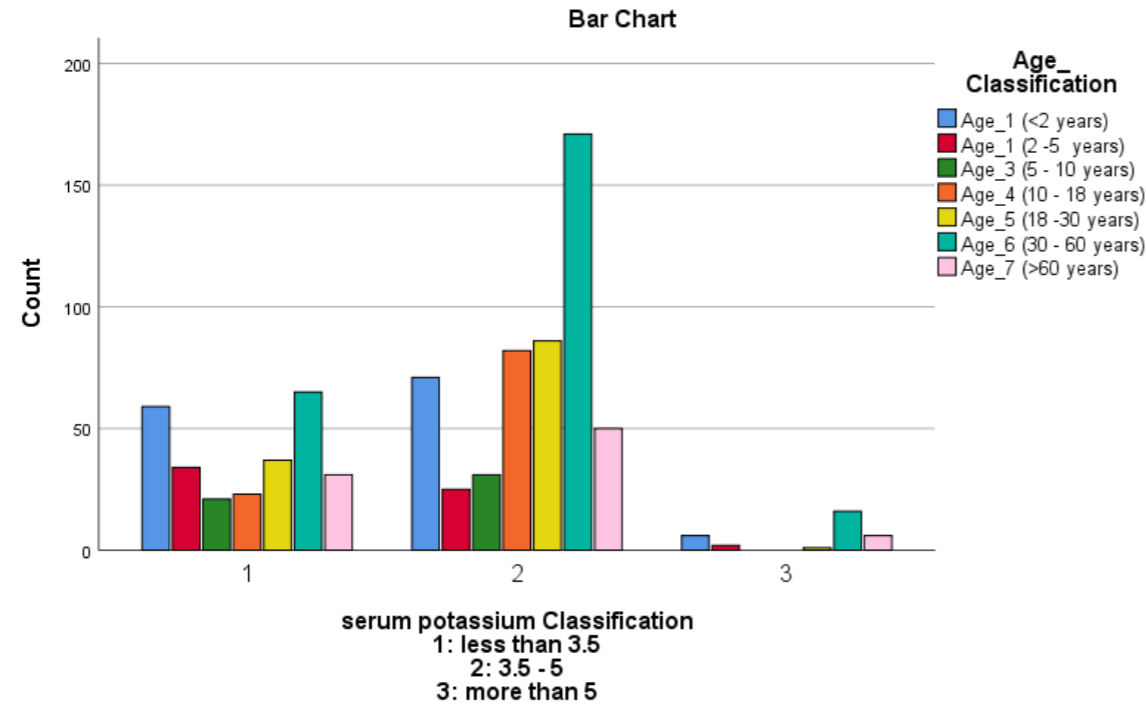

**SodiumSerum\_Class**

1: less than 135

2: 135 - 145

**3: more than 145 \* Age\_ Classification Crosstabulation**

|                   |                  | Age_ Classification          |                   |                    |                     |                     |                     |                   |       |        |
|-------------------|------------------|------------------------------|-------------------|--------------------|---------------------|---------------------|---------------------|-------------------|-------|--------|
|                   |                  | Age_1 (<2 years)             | Age_1 (2-5 years) | Age_3 (5-10 years) | Age_4 (10-18 years) | Age_5 (18-30 years) | Age_6 (30-60 years) | Age_7 (>60 years) | Total |        |
| SodiumSerum_Class | 1                | Count                        | 76                | 32                 | 22                  | 42                  | 47                  | 98                | 35    | 352    |
|                   | 1: less than 135 | % within SodiumSerum_Class   | 21.6%             | 9.1%               | 6.3%                | 11.9%               | 13.4%               | 27.8%             | 9.9%  | 100.0% |
|                   | 2: 135 - 145     | 1: less than 135             |                   |                    |                     |                     |                     |                   |       |        |
|                   | 3: more than 145 | 2: 135 - 145                 |                   |                    |                     |                     |                     |                   |       |        |
|                   |                  | 3: more than 145             |                   |                    |                     |                     |                     |                   |       |        |
|                   |                  | % within Age_ Classification | 56.3%             | 52.5%              | 43.1%               | 39.6%               | 37.6%               | 39.2%             | 40.7% | 43.2%  |
|                   | % of Total       | 9.3%                         | 3.9%              | 2.7%               | 5.2%                | 5.8%                | 12.0%               | 4.3%              | 43.2% |        |
| SodiumSerum_Class | 2                | Count                        | 54                | 27                 | 28                  | 62                  | 75                  | 150               | 50    | 446    |
|                   | 1: less than 135 | % within SodiumSerum_Class   | 12.1%             | 6.1%               | 6.3%                | 13.9%               | 16.8%               | 33.6%             | 11.2% | 100.0% |
|                   | 2: 135 - 145     | 1: less than 135             |                   |                    |                     |                     |                     |                   |       |        |
|                   | 3: more than 145 | 2: 135 - 145                 |                   |                    |                     |                     |                     |                   |       |        |
|                   |                  | 3: more than 145             |                   |                    |                     |                     |                     |                   |       |        |

|       |                             |        |        |        |        |        |        |        |        |
|-------|-----------------------------|--------|--------|--------|--------|--------|--------|--------|--------|
|       | % within Age_Classification | 40.0%  | 44.3%  | 54.9%  | 58.5%  | 60.0%  | 60.0%  | 58.1%  | 54.8%  |
|       | % of Total                  | 6.6%   | 3.3%   | 3.4%   | 7.6%   | 9.2%   | 18.4%  | 6.1%   | 54.8%  |
| 3     | Count                       | 5      | 2      | 1      | 2      | 3      | 2      | 1      | 16     |
|       | % within SodiumSerum_Class  | 31.3%  | 12.5%  | 6.3%   | 12.5%  | 18.8%  | 12.5%  | 6.3%   | 100.0% |
|       | 1: less than 135            |        |        |        |        |        |        |        |        |
|       | 2: 135 - 145                |        |        |        |        |        |        |        |        |
|       | 3: more than 145            |        |        |        |        |        |        |        |        |
|       | % within Age_Classification | 3.7%   | 3.3%   | 2.0%   | 1.9%   | 2.4%   | 0.8%   | 1.2%   | 2.0%   |
|       | % of Total                  | 0.6%   | 0.2%   | 0.1%   | 0.2%   | 0.4%   | 0.2%   | 0.1%   | 2.0%   |
| Total | Count                       | 135    | 61     | 51     | 106    | 125    | 250    | 86     | 814    |
|       | % within SodiumSerum_Class  | 16.6%  | 7.5%   | 6.3%   | 13.0%  | 15.4%  | 30.7%  | 10.6%  | 100.0% |
|       | 1: less than 135            |        |        |        |        |        |        |        |        |
|       | 2: 135 - 145                |        |        |        |        |        |        |        |        |
|       | % within Age_Classification | 100.0% | 100.0% | 100.0% | 100.0% | 100.0% | 100.0% | 100.0% | 100.0% |
|       | % of Total                  | 16.6%  | 7.5%   | 6.3%   | 13.0%  | 15.4%  | 30.7%  | 10.6%  | 100.0% |

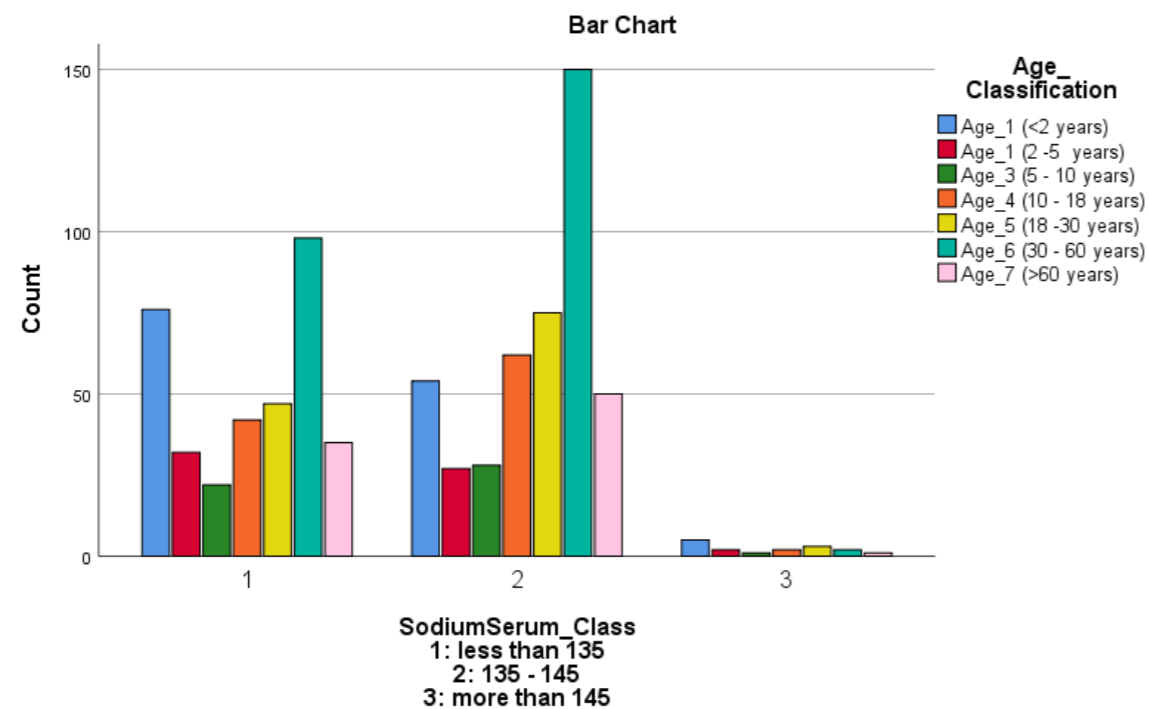

# Complications according to age Class

any complication through staying at hospital

Yes (1)

No (0) \* Age\_ Classification Crosstabulation

|                                                                   |            | Age_ Classification                                   |                    |                      |                       |                      |                       |                   |        |        |
|-------------------------------------------------------------------|------------|-------------------------------------------------------|--------------------|----------------------|-----------------------|----------------------|-----------------------|-------------------|--------|--------|
|                                                                   |            | Age_1 (<2 years)                                      | Age_1 (2 -5 years) | Age_3 (5 - 10 years) | Age_4 (10 - 18 years) | Age_5 (18 -30 years) | Age_6 (30 - 60 years) | Age_7 (>60 years) | Total  |        |
| any complication through staying at hospital<br>Yes (1)<br>No (0) | 0          | Count                                                 | 111                | 51                   | 57                    | 93                   | 94                    | 163               | 40     | 609    |
|                                                                   |            | % within any complication through staying at hospital | 18.2%              | 8.4%                 | 9.4%                  | 15.3%                | 15.4%                 | 26.8%             | 6.6%   | 100.0% |
|                                                                   |            | Yes (1)                                               |                    |                      |                       |                      |                       |                   |        |        |
|                                                                   |            | No (0)                                                |                    |                      |                       |                      |                       |                   |        |        |
|                                                                   |            | % within Age_ Classification                          | 53.9%              | 51.5%                | 66.3%                 | 66.4%                | 64.4%                 | 56.4%             | 42.1%  | 57.4%  |
|                                                                   |            | % of Total                                            | 10.5%              | 4.8%                 | 5.4%                  | 8.8%                 | 8.9%                  | 15.4%             | 3.8%   | 57.4%  |
| 1                                                                 |            | Count                                                 | 95                 | 48                   | 29                    | 47                   | 52                    | 126               | 55     | 452    |
|                                                                   |            | % within any complication through staying at hospital | 21.0%              | 10.6%                | 6.4%                  | 10.4%                | 11.5%                 | 27.9%             | 12.2%  | 100.0% |
|                                                                   |            | Yes (1)                                               |                    |                      |                       |                      |                       |                   |        |        |
|                                                                   |            | No (0)                                                |                    |                      |                       |                      |                       |                   |        |        |
|                                                                   |            | % within Age_ Classification                          | 46.1%              | 48.5%                | 33.7%                 | 33.6%                | 35.6%                 | 43.6%             | 57.9%  | 42.6%  |
|                                                                   |            | % of Total                                            | 9.0%               | 4.5%                 | 2.7%                  | 4.4%                 | 4.9%                  | 11.9%             | 5.2%   | 42.6%  |
| Total                                                             |            | Count                                                 | 206                | 99                   | 86                    | 140                  | 146                   | 289               | 95     | 1061   |
|                                                                   |            | % within any complication through staying at hospital | 19.4%              | 9.3%                 | 8.1%                  | 13.2%                | 13.8%                 | 27.2%             | 9.0%   | 100.0% |
|                                                                   |            | Yes (1)                                               |                    |                      |                       |                      |                       |                   |        |        |
|                                                                   |            | No (0)                                                |                    |                      |                       |                      |                       |                   |        |        |
|                                                                   |            | % within Age_ Classification                          | 100.0%             | 100.0%               | 100.0%                | 100.0%               | 100.0%                | 100.0%            | 100.0% | 100.0% |
|                                                                   | % of Total | 19.4%                                                 | 9.3%               | 8.1%                 | 13.2%                 | 13.8%                | 27.2%                 | 9.0%              | 100.0% |        |

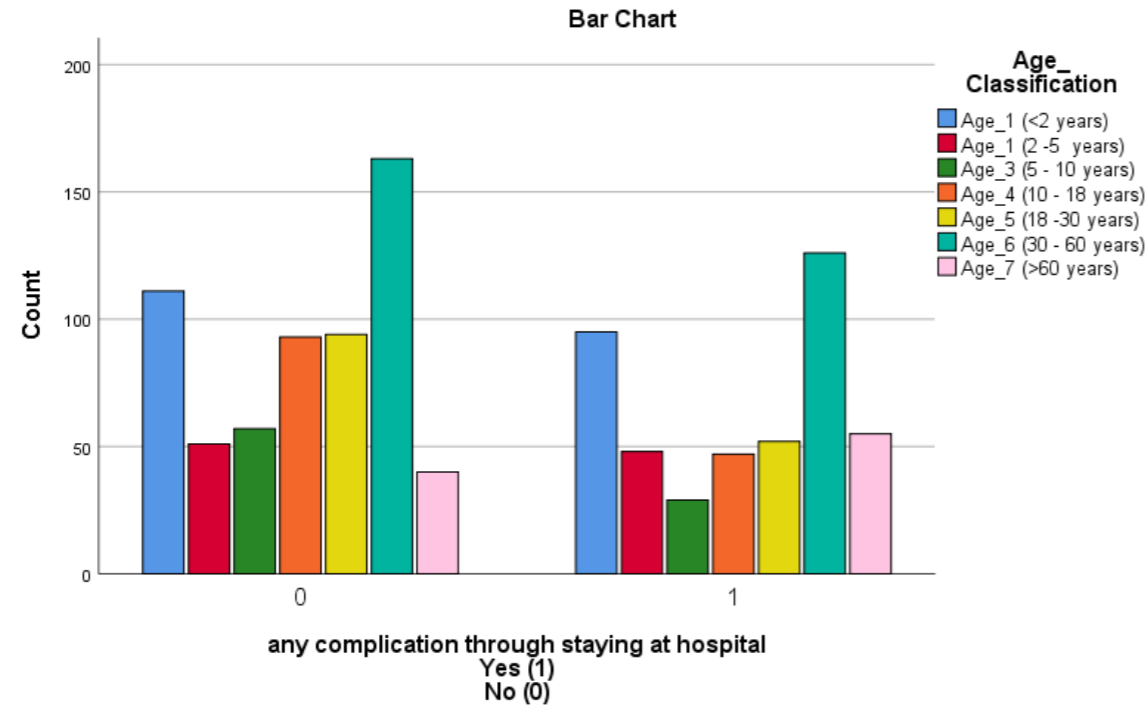

Sever Dehydration \* Age\_ Classification Crosstabulation

|                   |                            | Age_ Classification          |                   |                    |                     |                     |                     |                   |        |        |
|-------------------|----------------------------|------------------------------|-------------------|--------------------|---------------------|---------------------|---------------------|-------------------|--------|--------|
|                   |                            | Age_1 (<2 years)             | Age_1 (2-5 years) | Age_3 (5-10 years) | Age_4 (10-18 years) | Age_5 (18-30 years) | Age_6 (30-60 years) | Age_7 (>60 years) | Total  |        |
| Sever Dehydration | 0                          | Count                        | 164               | 73                 | 75                  | 124                 | 135                 | 245               | 69     | 885    |
|                   |                            | % within Sever Dehydration   | 18.5%             | 8.2%               | 8.5%                | 14.0%               | 15.3%               | 27.7%             | 7.8%   | 100.0% |
|                   |                            | % within Age_ Classification | 79.6%             | 73.7%              | 87.2%               | 88.6%               | 92.5%               | 84.8%             | 72.6%  | 83.4%  |
|                   |                            | % of Total                   | 15.5%             | 6.9%               | 7.1%                | 11.7%               | 12.7%               | 23.1%             | 6.5%   | 83.4%  |
|                   | 1                          | Count                        | 41                | 26                 | 11                  | 15                  | 11                  | 43                | 26     | 173    |
|                   |                            | % within Sever Dehydration   | 23.7%             | 15.0%              | 6.4%                | 8.7%                | 6.4%                | 24.9%             | 15.0%  | 100.0% |
|                   |                            | % within Age_ Classification | 19.9%             | 26.3%              | 12.8%               | 10.7%               | 7.5%                | 14.9%             | 27.4%  | 16.3%  |
|                   |                            | % of Total                   | 3.9%              | 2.5%               | 1.0%                | 1.4%                | 1.0%                | 4.1%              | 2.5%   | 16.3%  |
|                   | 4                          | Count                        | 1                 | 0                  | 0                   | 1                   | 0                   | 1                 | 0      | 3      |
|                   |                            | % within Sever Dehydration   | 33.3%             | 0.0%               | 0.0%                | 33.3%               | 0.0%                | 33.3%             | 0.0%   | 100.0% |
|                   |                            | % within Age_ Classification | 0.5%              | 0.0%               | 0.0%                | 0.7%                | 0.0%                | 0.3%              | 0.0%   | 0.3%   |
|                   |                            | % of Total                   | 0.1%              | 0.0%               | 0.0%                | 0.1%                | 0.0%                | 0.1%              | 0.0%   | 0.3%   |
| Total             | Count                      | 206                          | 99                | 86                 | 140                 | 146                 | 289                 | 95                | 1061   |        |
|                   | % within Sever Dehydration | 19.4%                        | 9.3%              | 8.1%               | 13.2%               | 13.8%               | 27.2%               | 9.0%              | 100.0% |        |

|                              |        |        |        |        |        |        |        |        |
|------------------------------|--------|--------|--------|--------|--------|--------|--------|--------|
| % within Age_ Classification | 100.0% | 100.0% | 100.0% | 100.0% | 100.0% | 100.0% | 100.0% | 100.0% |
| % of Total                   | 19.4%  | 9.3%   | 8.1%   | 13.2%  | 13.8%  | 27.2%  | 9.0%   | 100.0% |

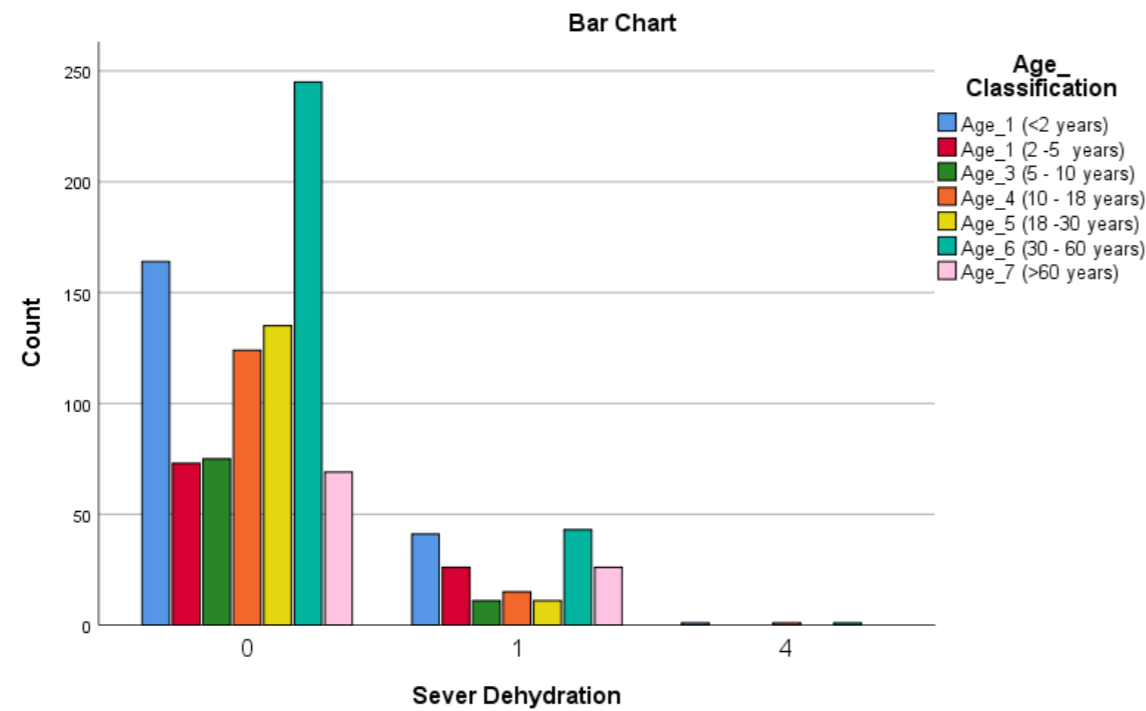

review

**Electrolyte Imbalance \* Age\_ Classification Crosstabulation**

|                       |                                | Age_ Classification            |                   |                    |                     |                     |                     |                   | Total  |        |
|-----------------------|--------------------------------|--------------------------------|-------------------|--------------------|---------------------|---------------------|---------------------|-------------------|--------|--------|
|                       |                                | Age_1 (<2 years)               | Age_1 (2-5 years) | Age_3 (5-10 years) | Age_4 (10-18 years) | Age_5 (18-30 years) | Age_6 (30-60 years) | Age_7 (>60 years) |        |        |
| Electrolyte Imbalance | 0                              | Count                          | 141               | 64                 | 62                  | 110                 | 107                 | 217               | 61     | 762    |
|                       |                                | % within Electrolyte Imbalance | 18.5%             | 8.4%               | 8.1%                | 14.4%               | 14.0%               | 28.5%             | 8.0%   | 100.0% |
|                       |                                | % within Age_ Classification   | 68.4%             | 64.6%              | 72.1%               | 78.6%               | 73.3%               | 75.1%             | 64.2%  | 71.8%  |
|                       |                                | % of Total                     | 13.3%             | 6.0%               | 5.8%                | 10.4%               | 10.1%               | 20.5%             | 5.7%   | 71.8%  |
| Electrolyte Imbalance | 1                              | Count                          | 65                | 35                 | 24                  | 30                  | 39                  | 72                | 34     | 299    |
|                       |                                | % within Electrolyte Imbalance | 21.7%             | 11.7%              | 8.0%                | 10.0%               | 13.0%               | 24.1%             | 11.4%  | 100.0% |
|                       |                                | % within Age_ Classification   | 31.6%             | 35.4%              | 27.9%               | 21.4%               | 26.7%               | 24.9%             | 35.8%  | 28.2%  |
|                       |                                | % of Total                     | 6.1%              | 3.3%               | 2.3%                | 2.8%                | 3.7%                | 6.8%              | 3.2%   | 28.2%  |
| Total                 | Count                          | 206                            | 99                | 86                 | 140                 | 146                 | 289                 | 95                | 1061   |        |
|                       | % within Electrolyte Imbalance | 19.4%                          | 9.3%              | 8.1%               | 13.2%               | 13.8%               | 27.2%               | 9.0%              | 100.0% |        |
|                       | % within Age_ Classification   | 100.0%                         | 100.0%            | 100.0%             | 100.0%              | 100.0%              | 100.0%              | 100.0%            | 100.0% |        |

|            |       |      |      |       |       |       |      |        |
|------------|-------|------|------|-------|-------|-------|------|--------|
| % of Total | 19.4% | 9.3% | 8.1% | 13.2% | 13.8% | 27.2% | 9.0% | 100.0% |
|------------|-------|------|------|-------|-------|-------|------|--------|

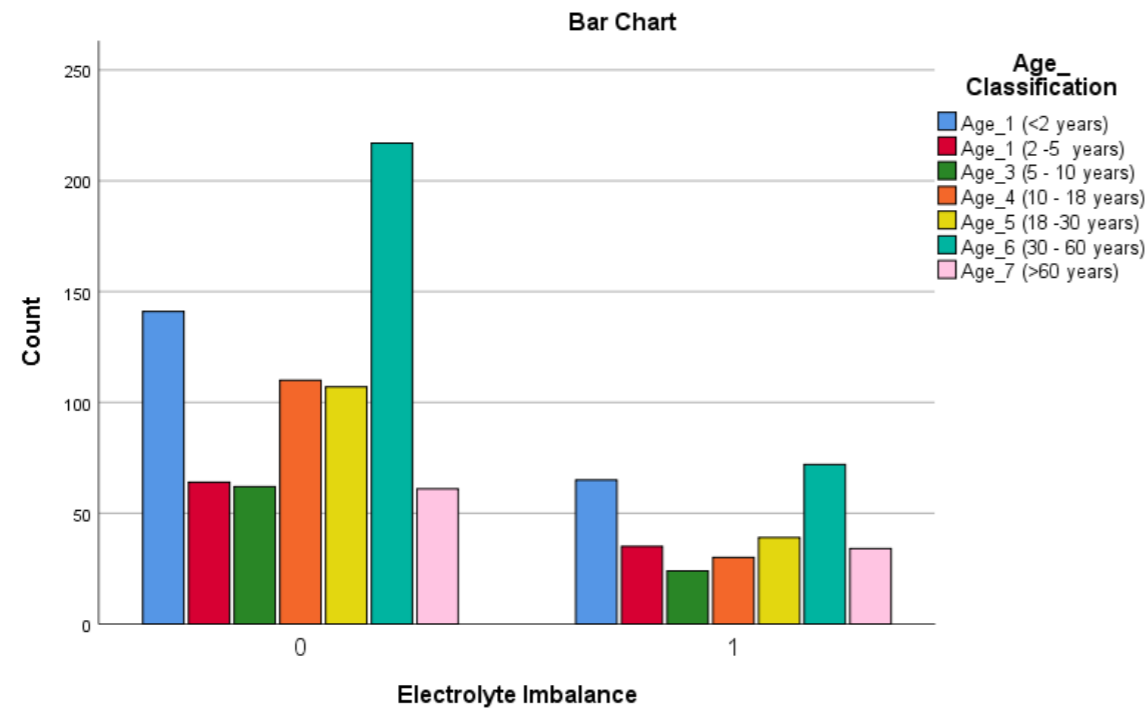

**Acute Kidney Injury \* Age Classification Crosstabulation**

|                     |                              | Age Classification           |                   |                    |                     |                     |                     |                   |        |        |
|---------------------|------------------------------|------------------------------|-------------------|--------------------|---------------------|---------------------|---------------------|-------------------|--------|--------|
|                     |                              | Age_1 (<2 years)             | Age_1 (2-5 years) | Age_3 (5-10 years) | Age_4 (10-18 years) | Age_5 (18-30 years) | Age_6 (30-60 years) | Age_7 (>60 years) | Total  |        |
| Acute Kidney Injury | 0                            | Count                        | 199               | 95                 | 79                  | 134                 | 141                 | 251               | 57     | 956    |
|                     |                              | % within Acute Kidney Injury | 20.8%             | 9.9%               | 8.3%                | 14.0%               | 14.7%               | 26.3%             | 6.0%   | 100.0% |
|                     |                              | % within Age Classification  | 96.6%             | 96.0%              | 91.9%               | 95.7%               | 96.6%               | 86.9%             | 60.0%  | 90.1%  |
|                     |                              | % of Total                   | 18.8%             | 9.0%               | 7.4%                | 12.6%               | 13.3%               | 23.7%             | 5.4%   | 90.1%  |
|                     | 1                            | Count                        | 7                 | 4                  | 7                   | 6                   | 5                   | 38                | 38     | 105    |
|                     |                              | % within Acute Kidney Injury | 6.7%              | 3.8%               | 6.7%                | 5.7%                | 4.8%                | 36.2%             | 36.2%  | 100.0% |
|                     |                              | % within Age Classification  | 3.4%              | 4.0%               | 8.1%                | 4.3%                | 3.4%                | 13.1%             | 40.0%  | 9.9%   |
|                     |                              | % of Total                   | 0.7%              | 0.4%               | 0.7%                | 0.6%                | 0.5%                | 3.6%              | 3.6%   | 9.9%   |
| Total               | Count                        | 206                          | 99                | 86                 | 140                 | 146                 | 289                 | 95                | 1061   |        |
|                     | % within Acute Kidney Injury | 19.4%                        | 9.3%              | 8.1%               | 13.2%               | 13.8%               | 27.2%               | 9.0%              | 100.0% |        |
|                     | % within Age Classification  | 100.0%                       | 100.0%            | 100.0%             | 100.0%              | 100.0%              | 100.0%              | 100.0%            | 100.0% |        |
|                     | % of Total                   | 19.4%                        | 9.3%              | 8.1%               | 13.2%               | 13.8%               | 27.2%               | 9.0%              | 100.0% |        |



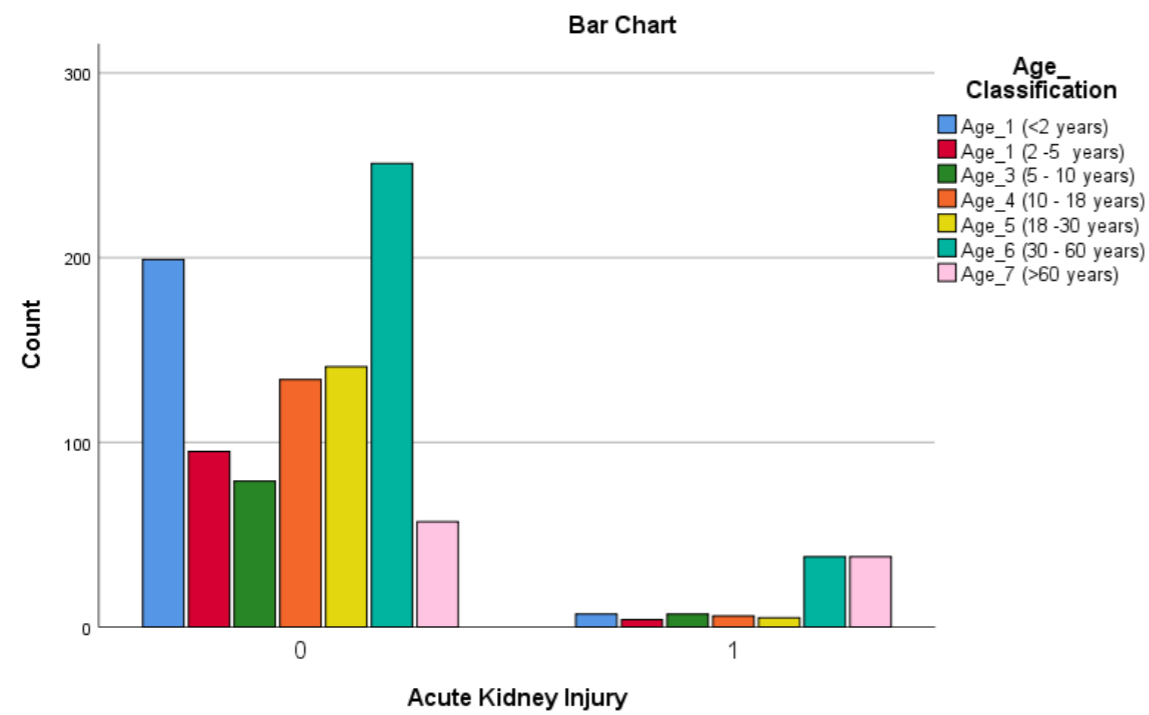

**Shock \* Age\_ Classification Crosstabulation**

|       |   | Age_ Classification          |                    |                      |                       |                      |                       |                   | Total  |        |
|-------|---|------------------------------|--------------------|----------------------|-----------------------|----------------------|-----------------------|-------------------|--------|--------|
|       |   | Age_1 (<2 years)             | Age_1 (2 -5 years) | Age_3 (5 - 10 years) | Age_4 (10 - 18 years) | Age_5 (18 -30 years) | Age_6 (30 - 60 years) | Age_7 (>60 years) |        |        |
| Shock | 0 | Count                        | 200                | 95                   | 85                    | 139                  | 144                   | 283               | 94     | 1040   |
|       |   | % within Shock               | 19.2%              | 9.1%                 | 8.2%                  | 13.4%                | 13.8%                 | 27.2%             | 9.0%   | 100.0% |
|       |   | % within Age_ Classification | 97.1%              | 96.0%                | 98.8%                 | 99.3%                | 98.6%                 | 97.9%             | 98.9%  | 98.0%  |
|       |   | % of Total                   | 18.9%              | 9.0%                 | 8.0%                  | 13.1%                | 13.6%                 | 26.7%             | 8.9%   | 98.0%  |
| Shock | 1 | Count                        | 6                  | 4                    | 1                     | 1                    | 2                     | 6                 | 1      | 21     |
|       |   | % within Shock               | 28.6%              | 19.0%                | 4.8%                  | 4.8%                 | 9.5%                  | 28.6%             | 4.8%   | 100.0% |
|       |   | % within Age_ Classification | 2.9%               | 4.0%                 | 1.2%                  | 0.7%                 | 1.4%                  | 2.1%              | 1.1%   | 2.0%   |
|       |   | % of Total                   | 0.6%               | 0.4%                 | 0.1%                  | 0.1%                 | 0.2%                  | 0.6%              | 0.1%   | 2.0%   |
| Total |   | Count                        | 206                | 99                   | 86                    | 140                  | 146                   | 289               | 95     | 1061   |
|       |   | % within Shock               | 19.4%              | 9.3%                 | 8.1%                  | 13.2%                | 13.8%                 | 27.2%             | 9.0%   | 100.0% |
|       |   | % within Age_ Classification | 100.0%             | 100.0%               | 100.0%                | 100.0%               | 100.0%                | 100.0%            | 100.0% | 100.0% |
|       |   | % of Total                   | 19.4%              | 9.3%                 | 8.1%                  | 13.2%                | 13.8%                 | 27.2%             | 9.0%   | 100.0% |

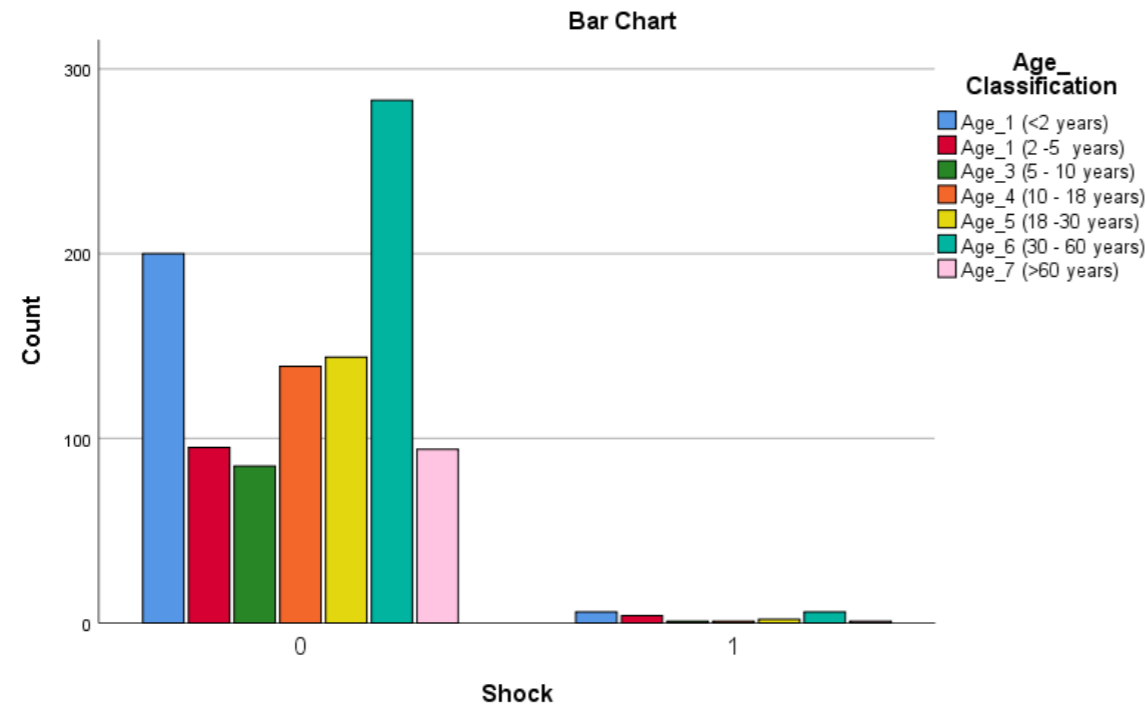

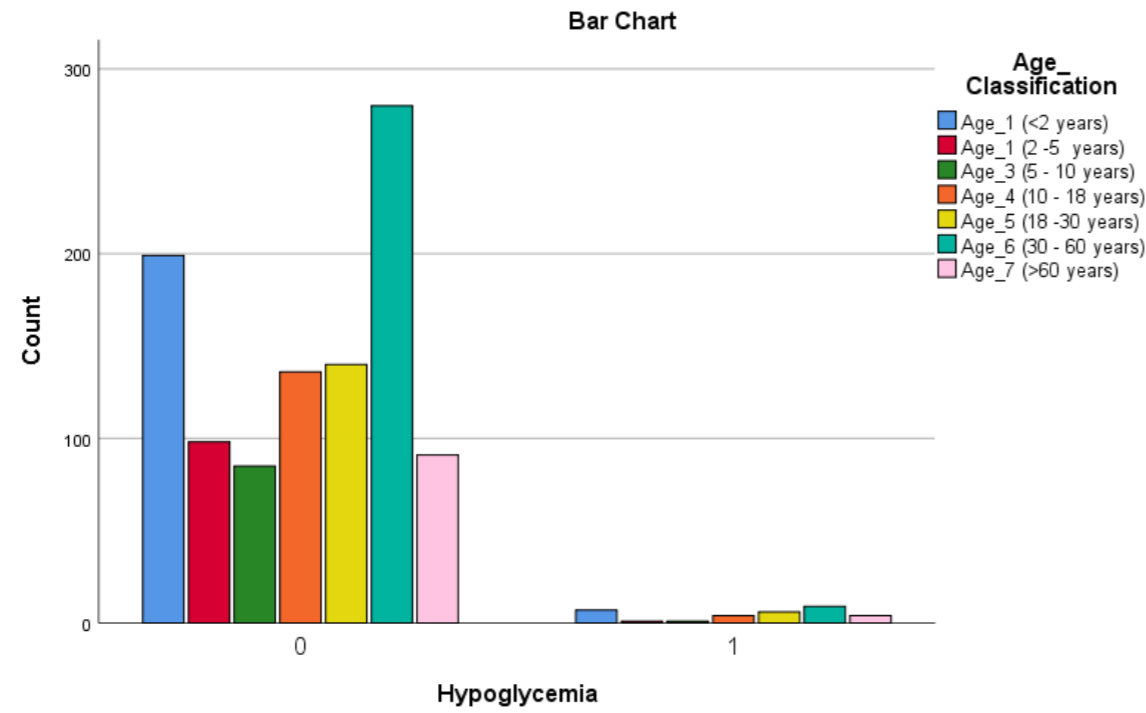

**Other \* Age\_ Classification Crosstabulation**

|       |                              | Age_ Classification          |                    |                      |                       |                      |                       |                   |        |        |
|-------|------------------------------|------------------------------|--------------------|----------------------|-----------------------|----------------------|-----------------------|-------------------|--------|--------|
|       |                              | Age_1 (<2 years)             | Age_1 (2 -5 years) | Age_3 (5 - 10 years) | Age_4 (10 - 18 years) | Age_5 (18 -30 years) | Age_6 (30 - 60 years) | Age_7 (>60 years) | Total  |        |
| Other | 0                            | Count                        | 199                | 96                   | 86                    | 139                  | 145                   | 284               | 93     | 1042   |
|       |                              | % within Other               | 19.1%              | 9.2%                 | 8.3%                  | 13.3%                | 13.9%                 | 27.3%             | 8.9%   | 100.0% |
|       |                              | % within Age_ Classification | 96.6%              | 97.0%                | 100.0%                | 99.3%                | 99.3%                 | 98.3%             | 97.9%  | 98.2%  |
|       |                              | % of Total                   | 18.8%              | 9.0%                 | 8.1%                  | 13.1%                | 13.7%                 | 26.8%             | 8.8%   | 98.2%  |
|       | 1                            | Count                        | 7                  | 3                    | 0                     | 1                    | 1                     | 5                 | 2      | 19     |
|       |                              | % within Other               | 36.8%              | 15.8%                | 0.0%                  | 5.3%                 | 5.3%                  | 26.3%             | 10.5%  | 100.0% |
|       |                              | % within Age_ Classification | 3.4%               | 3.0%                 | 0.0%                  | 0.7%                 | 0.7%                  | 1.7%              | 2.1%   | 1.8%   |
|       |                              | % of Total                   | 0.7%               | 0.3%                 | 0.0%                  | 0.1%                 | 0.1%                  | 0.5%              | 0.2%   | 1.8%   |
| Total | Count                        | 206                          | 99                 | 86                   | 140                   | 146                  | 289                   | 95                | 1061   |        |
|       | % within Other               | 19.4%                        | 9.3%               | 8.1%                 | 13.2%                 | 13.8%                | 27.2%                 | 9.0%              | 100.0% |        |
|       | % within Age_ Classification | 100.0%                       | 100.0%             | 100.0%               | 100.0%                | 100.0%               | 100.0%                | 100.0%            | 100.0% |        |
|       | % of Total                   | 19.4%                        | 9.3%               | 8.1%                 | 13.2%                 | 13.8%                | 27.2%                 | 9.0%              | 100.0% |        |

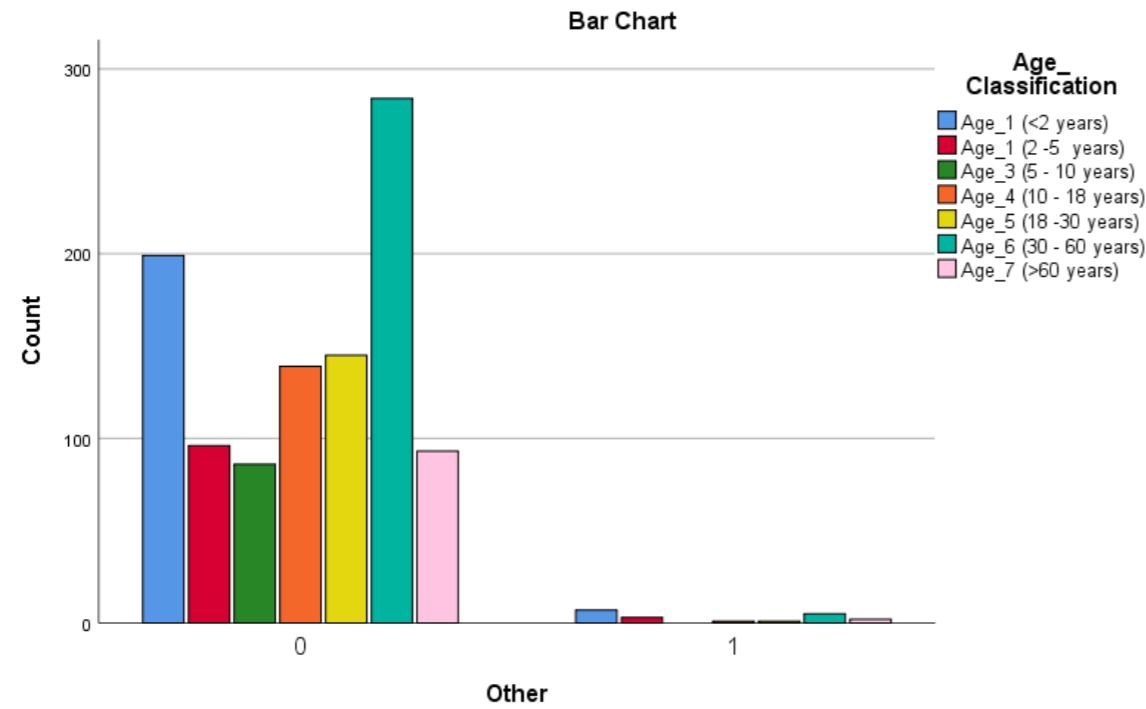

Patient Health at discharge \* Age\_ Classification Crosstabulation

|                             |      | Age_ Classification                  |                   |                    |                     |                     |                     |                   | Total |        |
|-----------------------------|------|--------------------------------------|-------------------|--------------------|---------------------|---------------------|---------------------|-------------------|-------|--------|
|                             |      | Age_1 (<2 years)                     | Age_1 (2-5 years) | Age_3 (5-10 years) | Age_4 (10-18 years) | Age_5 (18-30 years) | Age_6 (30-60 years) | Age_7 (>60 years) |       |        |
| Patient Health at discharge | Bad  | Count                                | 4                 | 0                  | 1                   | 2                   | 2                   | 8                 | 7     | 24     |
|                             |      | % within Patient Health at discharge | 16.7%             | 0.0%               | 4.2%                | 8.3%                | 8.3%                | 33.3%             | 29.2% | 100.0% |
|                             |      | % within Age_ Classification         | 1.9%              | 0.0%               | 1.2%                | 1.4%                | 1.4%                | 2.8%              | 7.4%  | 2.3%   |
|                             |      | % of Total                           | 0.4%              | 0.0%               | 0.1%                | 0.2%                | 0.2%                | 0.8%              | 0.7%  | 2.3%   |
|                             | Die  | Count                                | 1                 | 2                  | 0                   | 0                   | 0                   | 0                 | 1     | 4      |
|                             |      | % within Patient Health at discharge | 25.0%             | 50.0%              | 0.0%                | 0.0%                | 0.0%                | 0.0%              | 25.0% | 100.0% |
|                             |      | % within Age_ Classification         | 0.5%              | 2.0%               | 0.0%                | 0.0%                | 0.0%                | 0.0%              | 1.1%  | 0.4%   |
|                             |      | % of Total                           | 0.1%              | 0.2%               | 0.0%                | 0.0%                | 0.0%                | 0.0%              | 0.1%  | 0.4%   |
|                             | Good | Count                                | 181               | 88                 | 77                  | 115                 | 110                 | 210               | 65    | 846    |
|                             |      | % within Patient Health at discharge | 21.4%             | 10.4%              | 9.1%                | 13.6%               | 13.0%               | 24.8%             | 7.7%  | 100.0% |
|                             |      | % within Age_ Classification         | 87.9%             | 88.9%              | 89.5%               | 82.1%               | 75.3%               | 72.7%             | 68.4% | 79.7%  |
|                             |      | % of Total                           | 17.1%             | 8.3%               | 7.3%                | 10.8%               | 10.4%               | 19.8%             | 6.1%  | 79.7%  |

|       |          |                                      |        |        |        |        |        |        |        |        |
|-------|----------|--------------------------------------|--------|--------|--------|--------|--------|--------|--------|--------|
|       | Moderate | Count                                | 20     | 9      | 8      | 23     | 34     | 71     | 22     | 187    |
|       |          | % within Patient Health at discharge | 10.7%  | 4.8%   | 4.3%   | 12.3%  | 18.2%  | 38.0%  | 11.8%  | 100.0% |
|       |          | % within Age_ Classification         | 9.7%   | 9.1%   | 9.3%   | 16.4%  | 23.3%  | 24.6%  | 23.2%  | 17.6%  |
|       |          | % of Total                           | 1.9%   | 0.8%   | 0.8%   | 2.2%   | 3.2%   | 6.7%   | 2.1%   | 17.6%  |
| Total |          | Count                                | 206    | 99     | 86     | 140    | 146    | 289    | 95     | 1061   |
|       |          | % within Patient Health at discharge | 19.4%  | 9.3%   | 8.1%   | 13.2%  | 13.8%  | 27.2%  | 9.0%   | 100.0% |
|       |          | % within Age_ Classification         | 100.0% | 100.0% | 100.0% | 100.0% | 100.0% | 100.0% | 100.0% | 100.0% |
|       |          | % of Total                           | 19.4%  | 9.3%   | 8.1%   | 13.2%  | 13.8%  | 27.2%  | 9.0%   | 100.0% |

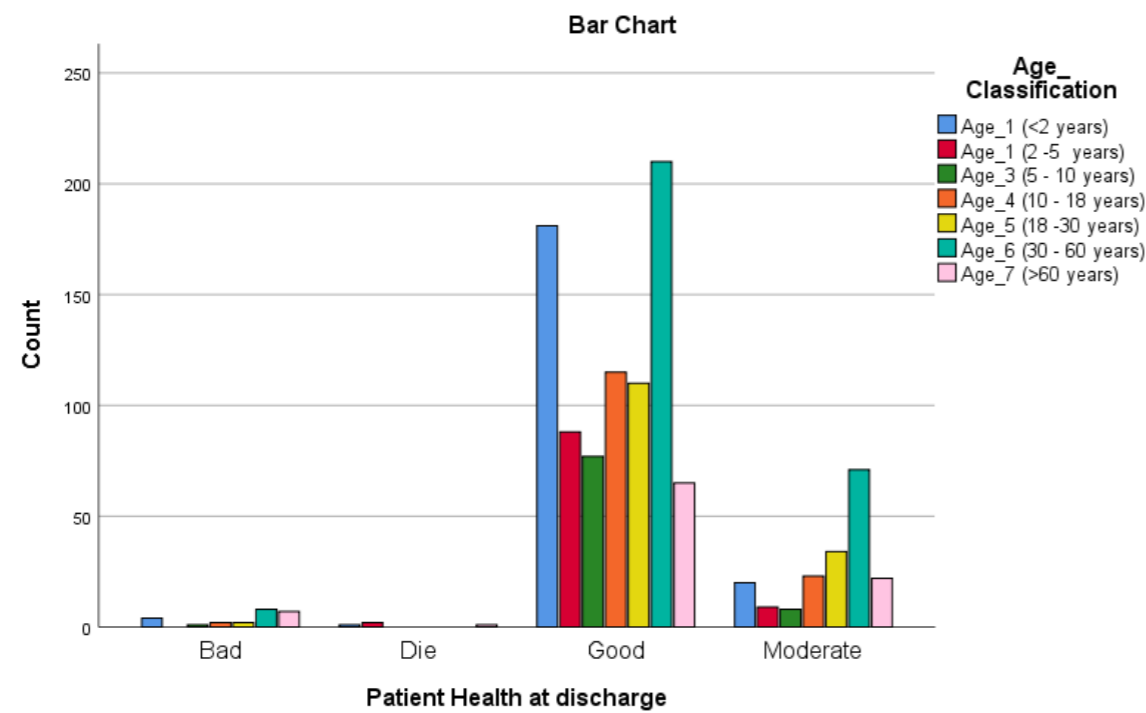

review only

**Patient Health after two weeks - one month from the admission \* Age\_ Classification Crosstabulation**

|                                                         |                                                            | Age_ Classification |                    |                      |                       |                      |                       | Total             |        |
|---------------------------------------------------------|------------------------------------------------------------|---------------------|--------------------|----------------------|-----------------------|----------------------|-----------------------|-------------------|--------|
|                                                         |                                                            | Age_1 (<2 years)    | Age_1 (2 -5 years) | Age_3 (5 - 10 years) | Age_4 (10 - 18 years) | Age_5 (18 -30 years) | Age_6 (30 - 60 years) | Age_7 (>60 years) | Total  |
| Patient Health after after two weeks from the admission | Count                                                      | 0                   | 2                  | 0                    | 0                     | 0                    | 0                     | 0                 | 2      |
|                                                         | % within Patient Health after two weeks from the admission | 0.0%                | 100.0%             | 0.0%                 | 0.0%                  | 0.0%                 | 0.0%                  | 0.0%              | 100.0% |

|  |          |                                                            |        |        |        |        |        |        |        |        |
|--|----------|------------------------------------------------------------|--------|--------|--------|--------|--------|--------|--------|--------|
|  |          | % within Age_ Classification                               | 0.0%   | 2.0%   | 0.0%   | 0.0%   | 0.0%   | 0.0%   | 0.0%   | 0.2%   |
|  |          | % of Total                                                 | 0.0%   | 0.2%   | 0.0%   | 0.0%   | 0.0%   | 0.0%   | 0.0%   | 0.2%   |
|  | Bad      | Count                                                      | 5      | 1      | 2      | 3      | 0      | 17     | 8      | 36     |
|  |          | % within Patient Health after two weeks from the admission | 13.9%  | 2.8%   | 5.6%   | 8.3%   | 0.0%   | 47.2%  | 22.2%  | 100.0% |
|  |          | % within Age_ Classification                               | 2.4%   | 1.0%   | 2.3%   | 2.1%   | 0.0%   | 5.9%   | 8.4%   | 3.4%   |
|  |          | % of Total                                                 | 0.5%   | 0.1%   | 0.2%   | 0.3%   | 0.0%   | 1.6%   | 0.8%   | 3.4%   |
|  | Die      | Count                                                      | 3      | 2      | 0      | 0      | 0      | 1      | 4      | 10     |
|  |          | % within Patient Health after two weeks from the admission | 30.0%  | 20.0%  | 0.0%   | 0.0%   | 0.0%   | 10.0%  | 40.0%  | 100.0% |
|  |          | % within Age_ Classification                               | 1.5%   | 2.0%   | 0.0%   | 0.0%   | 0.0%   | 0.3%   | 4.2%   | 0.9%   |
|  |          | % of Total                                                 | 0.3%   | 0.2%   | 0.0%   | 0.0%   | 0.0%   | 0.1%   | 0.4%   | 0.9%   |
|  | Good     | Count                                                      | 169    | 88     | 74     | 112    | 119    | 230    | 66     | 858    |
|  |          | % within Patient Health after two weeks from the admission | 19.7%  | 10.3%  | 8.6%   | 13.1%  | 13.9%  | 26.8%  | 7.7%   | 100.0% |
|  |          | % within Age_ Classification                               | 82.0%  | 88.9%  | 86.0%  | 80.0%  | 81.5%  | 79.6%  | 69.5%  | 80.9%  |
|  |          | % of Total                                                 | 15.9%  | 8.3%   | 7.0%   | 10.6%  | 11.2%  | 21.7%  | 6.2%   | 80.9%  |
|  | Moderate | Count                                                      | 29     | 6      | 10     | 25     | 27     | 41     | 17     | 155    |
|  |          | % within Patient Health after two weeks from the admission | 18.7%  | 3.9%   | 6.5%   | 16.1%  | 17.4%  | 26.5%  | 11.0%  | 100.0% |
|  |          | % within Age_ Classification                               | 14.1%  | 6.1%   | 11.6%  | 17.9%  | 18.5%  | 14.2%  | 17.9%  | 14.6%  |
|  |          | % of Total                                                 | 2.7%   | 0.6%   | 0.9%   | 2.4%   | 2.5%   | 3.9%   | 1.6%   | 14.6%  |
|  | Total    | Count                                                      | 206    | 99     | 86     | 140    | 146    | 289    | 95     | 1061   |
|  |          | % within Patient Health after two weeks from the admission | 19.4%  | 9.3%   | 8.1%   | 13.2%  | 13.8%  | 27.2%  | 9.0%   | 100.0% |
|  |          | % within Age_ Classification                               | 100.0% | 100.0% | 100.0% | 100.0% | 100.0% | 100.0% | 100.0% | 100.0% |
|  |          | % of Total                                                 | 19.4%  | 9.3%   | 8.1%   | 13.2%  | 13.8%  | 27.2%  | 9.0%   | 100.0% |

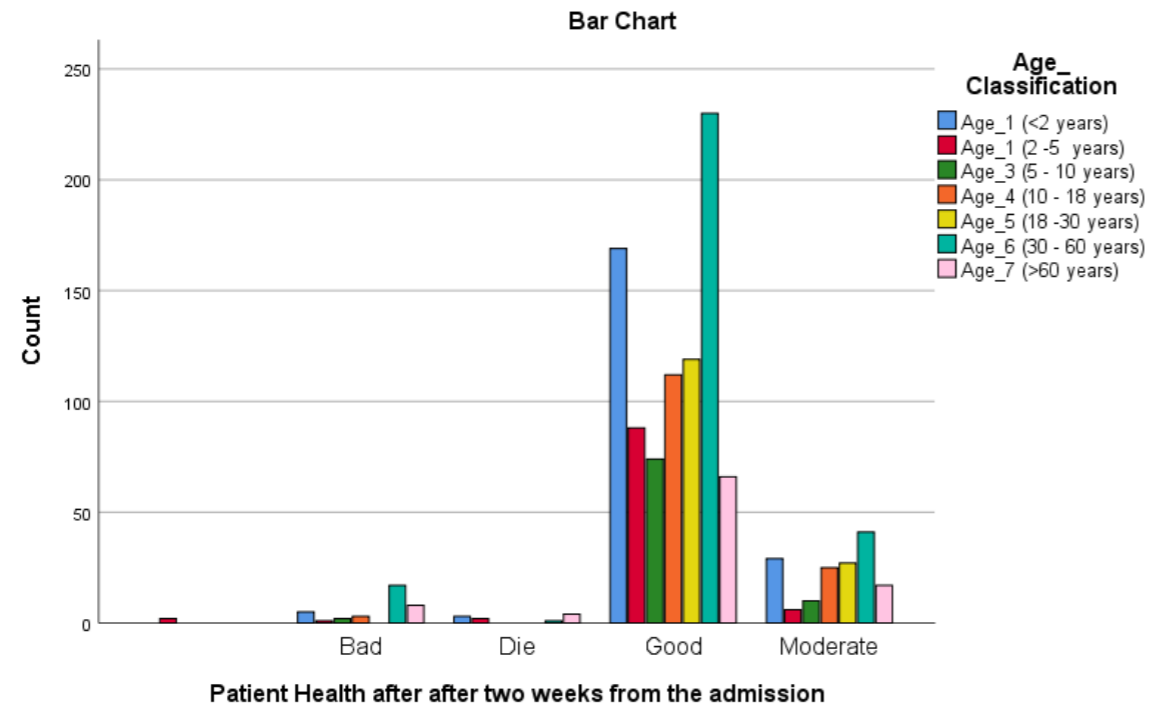

Peer review only

1  
2  
3  
4  
5  
6  
7  
8  
9  
10  
11  
12  
13  
14  
15  
16  
17  
18  
19  
20  
21  
22  
23  
24  
25  
26  
27  
28  
29  
30  
31  
32  
33  
34  
35  
36  
37  
38  
39  
40  
41  
42  
43  
44  
45  
46  
47  
48  
49  
50  
51  
52  
53  
54  
55  
56  
57  
58  
59  
60

**STROBE 2007 (v4) Statement—Checklist of items that should be included in reports of *cohort studies***

| Section/Topic                | Item # | Recommendation                                                                                                                                                                       | Reported on page # |
|------------------------------|--------|--------------------------------------------------------------------------------------------------------------------------------------------------------------------------------------|--------------------|
| <b>Title and abstract</b>    | 1      | (a) Indicate the study's design with a commonly used term in the title or the abstract                                                                                               | 1,2                |
|                              |        | (b) Provide in the abstract an informative and balanced summary of what was done and what was found                                                                                  | 1,2                |
| <b>Introduction</b>          |        |                                                                                                                                                                                      | <b>3</b>           |
| Background/rationale         | 2      | Explain the scientific background and rationale for the investigation being reported                                                                                                 | 3                  |
| Objectives                   | 3      | State specific objectives, including any prespecified hypotheses                                                                                                                     | 3                  |
| <b>Methods</b>               |        |                                                                                                                                                                                      | <b>4, 5</b>        |
| Study design                 | 4      | Present key elements of study design early in the paper                                                                                                                              | 4                  |
| Setting                      | 5      | Describe the setting, locations, and relevant dates, including periods of recruitment, exposure, follow-up, and data collection                                                      | 4                  |
| Participants                 | 6      | (a) Give the eligibility criteria, and the sources and methods of selection of participants. Describe methods of follow-up                                                           | 4                  |
|                              |        | (b) For matched studies, give matching criteria and number of exposed and unexposed                                                                                                  | 4                  |
| Variables                    | 7      | Clearly define all outcomes, exposures, predictors, potential confounders, and effect modifiers. Give diagnostic criteria, if applicable                                             | 4, 5               |
| Data sources/<br>measurement | 8*     | For each variable of interest, give sources of data and details of methods of assessment (measurement). Describe comparability of assessment methods if there is more than one group |                    |
| Bias                         | 9      | Describe any efforts to address potential sources of bias                                                                                                                            | 4                  |
| Study size                   | 10     | Explain how the study size was arrived at                                                                                                                                            | 4                  |
| Quantitative variables       | 11     | Explain how quantitative variables were handled in the analyses. If applicable, describe which groupings were chosen and why                                                         |                    |
| Statistical methods          | 12     | (a) Describe all statistical methods, including those used to control for confounding                                                                                                | 5                  |
|                              |        | (b) Describe any methods used to examine subgroups and interactions                                                                                                                  | 5                  |
|                              |        | (c) Explain how missing data were addressed                                                                                                                                          | 5                  |
|                              |        | (d) If applicable, explain how loss to follow-up was addressed                                                                                                                       | 5                  |
|                              |        | (e) Describe any sensitivity analyses                                                                                                                                                | 5                  |
| <b>Results</b>               |        |                                                                                                                                                                                      | <b>5, 6</b>        |



|                          |     |                                                                                                                                                                                                              |      |
|--------------------------|-----|--------------------------------------------------------------------------------------------------------------------------------------------------------------------------------------------------------------|------|
| Participants             | 13* | (a) Report numbers of individuals at each stage of study—eg numbers potentially eligible, examined for eligibility, confirmed eligible, included in the study, completing follow-up, and analysed            | 5    |
|                          |     | (b) Give reasons for non-participation at each stage                                                                                                                                                         | 5    |
|                          |     | (c) Consider use of a flow diagram                                                                                                                                                                           | 5    |
| Descriptive data         | 14* | (a) Give characteristics of study participants (eg demographic, clinical, social) and information on exposures and potential confounders                                                                     | 5    |
|                          |     | (b) Indicate number of participants with missing data for each variable of interest                                                                                                                          |      |
|                          |     | (c) Summarise follow-up time (eg, average and total amount)                                                                                                                                                  |      |
| Outcome data             | 15* | Report numbers of outcome events or summary measures over time                                                                                                                                               | 5, 6 |
| Main results             | 16  | (a) Give unadjusted estimates and, if applicable, confounder-adjusted estimates and their precision (eg, 95% confidence interval). Make clear which confounders were adjusted for and why they were included | 5, 6 |
|                          |     | (b) Report category boundaries when continuous variables were categorized                                                                                                                                    |      |
|                          |     | (c) If relevant, consider translating estimates of relative risk into absolute risk for a meaningful time period                                                                                             |      |
| Other analyses           | 17  | Report other analyses done—eg analyses of subgroups and interactions, and sensitivity analyses                                                                                                               |      |
| <b>Discussion</b>        |     |                                                                                                                                                                                                              | 6    |
| Key results              | 18  | Summarise key results with reference to study objectives                                                                                                                                                     |      |
| <b>Limitations</b>       |     |                                                                                                                                                                                                              | 3    |
| Interpretation           | 20  | Give a cautious overall interpretation of results considering objectives, limitations, multiplicity of analyses, results from similar studies, and other relevant evidence                                   |      |
| Generalisability         | 21  | Discuss the generalisability (external validity) of the study results                                                                                                                                        |      |
| <b>Other information</b> |     |                                                                                                                                                                                                              | 7    |
| Funding                  | 22  | Give the source of funding and the role of the funders for the present study and, if applicable, for the original study on which the present article is based                                                | 7    |

\*Give information separately for cases and controls in case-control studies and, if applicable, for exposed and unexposed groups in cohort and cross-sectional studies.

**Note:** An Explanation and Elaboration article discusses each checklist item and gives methodological background and published examples of transparent reporting. The STROBE checklist is best used in conjunction with this article (freely available on the Web sites of PLoS Medicine at <http://www.plosmedicine.org/>, Annals of Internal Medicine at <http://www.annals.org/>, and Epidemiology at <http://www.epidem.com/>). Information on the STROBE Initiative is available at [www.strobe-statement.org](http://www.strobe-statement.org).

# BMJ Open

## Acute Watery Diarrhea Cases During Cholera Outbreak in Syria: A Cohort Study

|                                 |                                                                                                                                                                                                                                                                                                                                                                                                                                                                                                                                                                                                                                                                                                                                                     |
|---------------------------------|-----------------------------------------------------------------------------------------------------------------------------------------------------------------------------------------------------------------------------------------------------------------------------------------------------------------------------------------------------------------------------------------------------------------------------------------------------------------------------------------------------------------------------------------------------------------------------------------------------------------------------------------------------------------------------------------------------------------------------------------------------|
| Journal:                        | <i>BMJ Open</i>                                                                                                                                                                                                                                                                                                                                                                                                                                                                                                                                                                                                                                                                                                                                     |
| Manuscript ID                   | bmjopen-2023-082385.R2                                                                                                                                                                                                                                                                                                                                                                                                                                                                                                                                                                                                                                                                                                                              |
| Article Type:                   | Original research                                                                                                                                                                                                                                                                                                                                                                                                                                                                                                                                                                                                                                                                                                                                   |
| Date Submitted by the Author:   | 02-Apr-2024                                                                                                                                                                                                                                                                                                                                                                                                                                                                                                                                                                                                                                                                                                                                         |
| Complete List of Authors:       | Arnaout, Ahmad; University of Aleppo<br>Nerabani, Yaman; University of Aleppo Faculty of Medicine<br>Sawas, Mohamad Nabhan; University of Aleppo<br>Alhejazi, Tala; University of Aleppo<br>Farho, M. Ali; University of Aleppo<br>Arnaout, Khaled; University of Aleppo<br>Alshaker, Hassan; University of Aleppo<br>Shebli, Baraa; University of Aleppo Faculty of Medicine<br>Helou, Mostafa; University of Aleppo Faculty of Medicine<br>Mobaied, Bashir Badawi; University of Aleppo Faculty of Medicine<br>Mouti, Mohamad Bassel; University of Aleppo<br>Kady, Fares; University of Aleppo Faculty of Medicine<br>Aljarad, Ziad; University of Aleppo Faculty of Medicine<br>AUH Team, Aleppo University Hospital Team; University of Aleppo |
| <b>Primary Subject Heading</b>: | Gastroenterology and hepatology                                                                                                                                                                                                                                                                                                                                                                                                                                                                                                                                                                                                                                                                                                                     |
| Secondary Subject Heading:      | Epidemiology, Infectious diseases, Public health                                                                                                                                                                                                                                                                                                                                                                                                                                                                                                                                                                                                                                                                                                    |
| Keywords:                       | GASTROENTEROLOGY, INFECTIOUS DISEASES, Gastrointestinal infections < GASTROENTEROLOGY, Public health < INFECTIOUS DISEASES                                                                                                                                                                                                                                                                                                                                                                                                                                                                                                                                                                                                                          |
|                                 |                                                                                                                                                                                                                                                                                                                                                                                                                                                                                                                                                                                                                                                                                                                                                     |

SCHOLARONE™  
Manuscripts



I, the Submitting Author has the right to grant and does grant on behalf of all authors of the Work (as defined in the below author licence), an exclusive licence and/or a non-exclusive licence for contributions from authors who are: i) UK Crown employees; ii) where BMJ has agreed a CC-BY licence shall apply, and/or iii) in accordance with the terms applicable for US Federal Government officers or employees acting as part of their official duties; on a worldwide, perpetual, irrevocable, royalty-free basis to BMJ Publishing Group Ltd ("BMJ") its licensees and where the relevant Journal is co-owned by BMJ to the co-owners of the Journal, to publish the Work in this journal and any other BMJ products and to exploit all rights, as set out in our [licence](#).

The Submitting Author accepts and understands that any supply made under these terms is made by BMJ to the Submitting Author unless you are acting as an employee on behalf of your employer or a postgraduate student of an affiliated institution which is paying any applicable article publishing charge ("APC") for Open Access articles. Where the Submitting Author wishes to make the Work available on an Open Access basis (and intends to pay the relevant APC), the terms of reuse of such Open Access shall be governed by a Creative Commons licence – details of these licences and which [Creative Commons](#) licence will apply to this Work are set out in our licence referred to above.

Other than as permitted in any relevant BMJ Author's Self Archiving Policies, I confirm this Work has not been accepted for publication elsewhere, is not being considered for publication elsewhere and does not duplicate material already published. I confirm all authors consent to publication of this Work and authorise the granting of this licence.

# Acute Watery Diarrhea Cases During Cholera Outbreak in Syria: A Cohort Study

Ahmad Yamen Arnaout<sup>1\*</sup>, Yaman Nerabani<sup>1</sup>, Mohamad Nabhan Sawas<sup>1</sup>, Tala Jouma Alhejazi<sup>1</sup>, Mohamad Ali Farho<sup>1</sup>, Khaled Arnaout<sup>1</sup>, Hassan Alshaker<sup>1</sup>, Baraa Shebli<sup>2</sup>, Mostafa Helou<sup>3</sup>, Bashir Badawi Mobaied<sup>4</sup>, Mohamad Bassel Mouti<sup>5</sup>, Fares Kady<sup>6</sup>, Ziad Aljarad<sup>4</sup>, Aleppo University Hospital Team\*\*

<sup>1</sup> MD, Faculty of Medicine, University of Aleppo, Aleppo, Syrian Arab Republic.

<sup>2</sup> MD, Cardiology Department, Internal Medicine, Aleppo University Hospital, Aleppo, Syrian Arab Republic.

<sup>3</sup> MD, Internal Medicine, Aleppo University Hospital, Aleppo, Syrian Arab Republic.

<sup>4</sup> MD, MSc, Ph.D. gastroenterologist, University of Aleppo, Aleppo, Syrian Arab Republic.

<sup>5</sup> MD, MSc, Ph.D. Pediatric Department, Aleppo University Hospital, Aleppo, Syrian Arab Republic.

<sup>6</sup> MD, MPH, MSc, Ph.D. Public Health Specialist

\*: Corresponding Author: [yamen.arnout@gmail.com](mailto:yamen.arnout@gmail.com), (Open Researcher and Contributor ID, 0000-0002-1254-6647)

\*\* : Aleppo University Hospital Team: Co-authors participated in collecting data.

## Abstract

1  
2  
3 32 **Objectives:** The aim of this study is a descriptive presentation of cases of acute watery diarrhea  
4 33 (AWD) that were presented to Aleppo University Hospital (AUH) during the recent cholera outbreak  
5 34 in Syria.

6  
7 35 **Design:** Prospective, observational, cohort, study.  
8

9 36 **Setting and Participants:** A total of 1061 AWD patients were admitted to AUH during the timeframe  
10 37 of September 20th, 2022, to October 20th, 2022. The data collection was done through a structured  
11 38 questionnaire. This includes comprehensive clinical observation, laboratory analyses, therapeutic  
12 39 interventions, and holistic case evaluations

13  
14  
15 40 **Results:** The analysis has revealed notable insights; A predominant proportion of patients (58.6%)  
16 41 were residents from urban areas, and 40.3% were residents from rural areas. Intriguingly, a diverse  
17 42 range of potential infection sources emerged from patient data within our hospital, including  
18 43 uncontrolled well water, vegetables, and fecal-oral transmission through contaminated street/fast food.  
19 44 At discharge, most patients were in good health (79.7%), followed by moderate health (17.6%) and  
20 45 poor health (2.3%), with a minimal percentage dying before discharge (0.4%). The most common  
21 46 complications reported at admission and during hospitalization included electrolyte imbalance  
22 47 (28.2%), followed by severe dehydration (16.3%). In the follow-up period, the majority of patients  
23 48 exhibited good health (81.0%). Older patients (>60 years) had poorer outcomes, with 8.4% having  
24 49 poor health and 4.2% death rate.

25  
26  
27 50 **Conclusions:** The study found results consistent with previous AWD outbreaks in developing  
28 51 countries like Yemen, Nigeria, and Lebanon. Preventative measures like improving water sanitation  
29 52 and hygiene practices are essential to prevent future outbreaks and ease the strain on healthcare  
30 53 systems. Therefore, future studies must investigate the risk factors that increase the spread and the  
31 54 severity of the disease and investigate the best management method.  
32  
33  
34  
35  
36  
37  
38  
39  
40  
41  
42  
43  
44  
45  
46  
47  
48  
49  
50  
51  
52  
53  
54  
55  
56  
57  
58  
59  
60  
61  
62  
63  
64  
65

### 65 **Strengths and limitations**

- 66 • The study conducted a thorough analysis of AWD cases at Aleppo University Hospital  
67 following the declaration of a cholera outbreak in Syria, providing valuable insights into the  
68 disease's impact and management.
- 69 • By encompassing all patients with AWD, regardless of age or admission status, the research  
70 captured a wide range of cases, enhancing the diversity and inclusivity of the findings.

- The research, which was non-interventional and based solely on observation, included all patients with AWD, regardless of age or whether they were admitted to the hospital or discharged on the same day.
- The study provides detailed management and clinical assessment data, along with a two-week to one-month follow-up period.
- Positioned at the primary medical facility in the city where the initial cholera case emerged, this research serves as an essential tool for comprehending and combating the ongoing outbreak.

## 1. Introduction

Acute Watery Diarrhea (AWD) is a condition that typically lasts for less than 14 days and is caused by enterotoxigenic bacteria or viral infections in the gastrointestinal system. The bacterial etiologies of AWD are diverse and can include *Vibrio cholera*, *Shigella*, *Salmonella*, *E. coli*, or *Campylobacter* infections.

AWD outbreaks present significant challenges to healthcare systems due to their rapid onset and often unknown sources of infection. These outbreaks are frequently concentrated in areas where potential sources of infection, such as contaminated drinking water, inadequate water filtration infrastructure, animal exposure, and sewage-contaminated food and beverages, are prevalent. The response and impact of these outbreaks vary between countries based on factors such as healthcare infrastructure, emergency response capabilities, food and water sanitation practices, and population awareness of infectious diseases. Alarmingly, several countries with historically low AWD rates have experienced recent outbreaks, with nearly 70,106 reported AWD cases in three Middle East and North African countries, according to the WHO's December 2022 reports. [1–3]

Cholera, a waterborne intestinal infection transmitted through the fecal-oral route, is a well-known cause of AWD cases. Despite being easily treatable, cholera can become life-threatening if rehydration is delayed, leading to rapid volume depletion. While many developed countries successfully eradicated cholera years ago, low- and middle-income countries continue to face occasional outbreaks.[1,2] In late 2022, countries in the Eastern Mediterranean region, such as Iraq and Lebanon, reported significant cholera outbreaks, with Syria experiencing a resurgence of cholera after nearly two decades. [3]

By December 10, 2022, Syria had reported 61,671 suspected and confirmed cholera cases, along with 100 deaths across its 14 governorates. The outbreak began on September 10, 2022, when the Ministry of Health (MoH) declared a cholera outbreak in Aleppo Governorate. Following this declaration, other governorates began to report cases of Acute Watery Diarrhea (AWD) and suspected cholera cases. The most affected areas included Deir Ez-Zor with 20,103 cases, Idleb with 14,142 cases, Raqqa with 12,818 cases, and Aleppo with 11,617 cases, as indicated by reports from the World Health Organization (WHO) and the Syrian MoH. These reports also highlighted a case fatality rate of 0.2% and an overall cholera positivity rate of 46%. [3]

Despite the region's high prevalence of AWD and cholera outbreaks, there is limited detailed information available on the quality of the response and patient outcomes during these emergencies. By examining the cases at Aleppo University Hospital (AUH) during the outbreak period, we aim to provide

1  
2  
3 113 valuable insights into the effectiveness of response measures implemented by health authorities and the  
4 114 challenges encountered in managing AWD and cholera cases in a resource-limited environment. This  
5 115 information can inform future outbreak preparedness and response strategies, potentially reducing the  
6 116 morbidity and mortality rates associated with these infectious diseases.

8  
9 117 This study focuses on reporting AWD cases at AUH in Aleppo Governorate during the outbreak from  
10 118 September 20 to October 20. The objective is to assess the quality of the response and patient outcomes  
11 119 within 30 days of the cases being reported in order to gain a better understanding of the healthcare  
12 120 system's management of AWD and cholera cases during this critical period.

13  
14 121

## 15 122 **2. Methods**

### 16 123 **2.1. Study design and Participants**

17 124 This study in Syria is a localized, longitudinal study involving individuals of all ages. We conducted a  
18 125 prospective cohort study to enhance our understanding of AWD and to collect a comprehensive and  
19 126 high-quality dataset on the condition. Patients were admitted to AUH between September 20, 2022, and  
20 127 October 20, 2022. The process began with a request for verbal informed consent by physicians prior to  
21 128 the questionnaire administration, in compliance with the Strengthening the Reporting of Observational  
22 129 Studies in Epidemiology (STROBE) statement. [4]

### 25 130 **2.2. Sample size calculation**

26 131 The sample size for this study was calculated based on the estimated prevalence of AWD in the  
27 132 population. Using a conservative estimate of 2%, a confidence level of 95%, and a margin of error of  
28 133 0.5%, the required sample size was calculated to be 385 participants. To account for potential dropouts  
29 134 and incomplete data, we aimed to recruit a more than 385 participants for this study during the chosen  
30 135 period for the study.

### 34 136 **2.3. Ethical approval**

35 137 The study received approval from AUH. The data utilized in this study were fully anonymized before  
36 138 being accessed by the authors. Furthermore, the study was conducted in accordance with the ethical  
37 139 standards outlined in the 1964 Declaration of Helsinki and its subsequent amendments, following ethical  
38 140 approval from the ethics committee at the Faculty of Medicine, University of Aleppo, with registered  
39 141 reference number 1932, to ensure compliance with ethical standards and guidelines for research  
40 142 involving human subjects.

### 43 143 **2.4. Bias**

44 144 The dean of the Faculty of Medicine, the heads of the Department of Internal Medicine and the  
45 145 Department of Pediatric Medicine, and the general director of AUH conducted an overall review and  
46 146 validation of the project. Medical staff members were also involved in the research. Investigators  
47 147 conducted fieldwork, with interviewers responsible for conducting interviews and collecting data, and  
48 148 doctors responsible for the health assessments. All efforts were made to ensure accurate registration of  
49 149 all data.

### 52 150 **2.5. Data collection and Variables**

53 151 Patients were interviewed using a structured questionnaire to collect information on patient  
54 152 characteristics, including demographics (such as age, gender, and place of residence), admission details  
55 153 (e.g., dehydration, fluid loss, and stool description), comorbidities, and previous medications.

58 154 Clinical examinations and patient history data were recorded, including measurements of blood pressure  
59 155 and heart rate, and assessment of clinical symptoms such as diarrhea, nausea, vomiting, fever, among

156 others. Additionally, details on cholera diagnosis, laboratory findings, rehydration, management, and  
157 follow-up were recorded. The questionnaire was designed following international standards.

158 All laboratory analyses were carried out by the central laboratory at AUH, including complete blood  
159 count and blood biochemistry (blood glucose, serum creatinine, urea, potassium, sodium).

160 Patients were categorized into five grades based on their health status using the American Society of  
161 Anesthesiologists Physical Status Classification. [5] Habits such as smoking and alcohol consumption  
162 were evaluated using the World Health Organization's Smoking and Tobacco Use Policy, which  
163 classifies patients into four categories: daily smoker, occasional smoker, former smoker, and never  
164 smoker. [6]

165 The patients' ages were categorized into several age groups. Patients were assessed, and their data was  
166 recorded during their hospital stay and two weeks after discharge. Those whose condition did not  
167 improve after two weeks were followed up for 30 days. Evaluation of patients occurred at discharge and  
168 two weeks later, with classification into several health categories: good health, indicating the absence  
169 of symptoms or presence of mild symptoms from the recovery stage; moderate health, indicating  
170 ongoing disease symptoms without serious complications or organ damage; poor health, indicating  
171 disease complications and lack of improvement; and deceased patients. Complications of AWD were  
172 documented, and dehydration severity was evaluated. The Patient Data Collection Form is provided in  
173 **Supplementary File A.**

## 174 **2.6. Patient and public involvement**

175 The patients did not participate in the questionnaire design, biological measurements, or outcome  
176 measures; neither did they participate in the design, recruitment, and conducting of the study.  
177 Furthermore, all patients or their families were informed about the use of the data for research purposes  
178 in this study.

## 179 **2.7. Statistical methods**

180 Patient data were entered into an Excel database and analyzed using SPSS statistical software version  
181 26.0. Descriptive statistics, such as frequencies and percentages, were used to summarize patients' key  
182 results, including gender, age category, geographic location, shock index, ASA, and infection source.  
183 Quantitative variables were categorized, and frequencies and percentages for each category were  
184 calculated. Subgroup analyses by age groups for all primary study variables provided a comprehensive  
185 data assessment. The last observation carried forward technique was employed to address missing data,  
186 involving carrying forward the most recent recorded observation to fill in missing data points during  
187 follow-up. The follow-up period lasted two weeks but extended up to a month for deteriorating patients.  
188 This method allowed for systematic management of missing data and ensured analyses were conducted  
189 using the most complete dataset available.

## 190 **3. Results**

### 191 **3.1. Main Characteristics of the Patients**

192 A total of 1061 AWD patients were admitted to AUH between 22 September and 22 October 2022, with  
193 a notable gender distribution showcasing 46.5% as males. The majority were in the middle-age category  
194 (30-60 years) and early childhood (<2 years). A predominant proportion of patients (58.6%) were  
195 residents from urban areas, and 40.3% were residents from rural areas. According to the ASA score,  
196 74.4% were healthy (ASA1).

197 In most cases (63%) patients could not define the infection source. It seems that the recent AWD  
198 outbreak in Syria is not associated with tap water contamination, as no clear clustering of cases were



1  
2  
3 199 identified. Intriguingly, a diverse range of potential infection sources emerged from patient data within  
4 200 our hospital, including uncontrolled well water, vegetables (notably parsley and mint, might irrigated  
5 201 with contaminated water), and fecal-oral transmission through contaminated street/fast food particularly  
6 202 those integrating vegetables. The summary of the patients' characteristics is shown in **Table 1**.

### 8 203 **3.2. Clinical Manifestations and Laboratory Findings**

9  
10 204 The most frequent clinical manifestations of the patients besides diarrhea were nausea and vomiting,  
11 205 and abdominal cramps (73.6%, 54.3%) respectively. Except for WBC count, most of the patients had  
12 206 normal laboratory tests. 47.6% of patients had hemoglobin between (10-17 g/dL). Platelets were also  
13 207 within the normal range in 77.5% of patients. On the other hand, 55.8% of patients had WBC over  
14 208  $10 \times 10^9/L$ . All Laboratory tests and Clinical Manifestations are demonstrated in detail in **Table 2**.

### 16 209 **3.3. Patients Management**

17  
18 210 The mainstay of treatment is aggressive volume repletion with adjuvant antibiotic therapy. 77.7% of  
19 211 patients needed intravenous rehydration, 33.4% were given Lactated Ringer solution, and 23.6%  
20 212 received Isotonic sodium chloride solution. Also, 65.7% were given oral rehydration salts (ORS).  
21 213 Regarding antibiotics, doxycycline and ciprofloxacin were prescribed in most cases (61%). Other  
22 214 antibiotics were also used in some cases, such as tetracycline, trimethoprim/sulfamethoxazole,  
23 215 furazolidone, and others. The accurate proportions are shown in **Table 3**.

### 26 216 **3.4. Outcome of the Study**

27  
28 217 Among the 1061 cases, the majority of patients were discharged on the same day as admission (69.8%),  
29 218 with fewer discharged the following day (3.0%) or after a longer period (27.1%). A small percentage of  
30 219 patients required ICU care (0.9%) and dialysis (1%). At discharge, most patients were in good health  
31 220 (79.7%), followed by moderate health (17.6%) and poor health (2.3%). A minimal number of patients  
32 221 passed away before discharge (0.4%).

33  
34 222 Reported complications at admission and during hospital stays included severe dehydration (16.3%),  
35 223 electrolyte imbalance (28.2%), acute kidney injury (0.9%), shock (2.0%), hypoglycemia (3.0%), and  
36 224 other issues (1.8%). The most common complications were electrolyte imbalance (28.2%) followed by  
37 225 severe dehydration (16.3%).

38  
39 226 In the follow-up period, the majority of patients continued to show good health (81.0%), followed by  
40 227 moderate health (14.6%) and poor health (3.4%). A small number of patients passed away during follow-  
41 228 up, with four deaths at AUH and six at other hospitals (0.9% in total). **Table 4**

42  
43 229 In the sub-group analysis two weeks to one-month post-admission, the majority of patients in all age  
44 230 groups exhibited positive health outcomes, ranging from 69.5% to 88.9%. The Age7 (>60 years)  
45 231 category had the highest percentage of patients with poor health outcomes at 8.4%, with the highest  
46 232 death rate in the same age group at 4.2%, followed by patients under 2 years at 1.5%. Overall, the data  
47 233 suggests varying health outcomes based on age, with younger individuals showing a higher likelihood  
48 234 of recovery compared to older age groups. (**Supplementary File B**)

## 51 235 **4. Discussion**

52  
53 236 Between September and October 2022, AUH admitted 1061 patients with AWD, most of whom were  
54 237 middle-aged or young children. The results of the 2017 outbreak in Yemen also show a similar pattern  
55 238 to our findings, with the middle-aged (15-49 years) and children (less than 15 years) groups being the  
56 239 most affected. [7,8] In the same context, 69% of those infected with the Nigerian outbreak in 2005 were  
57 240 15 years old and above, and 90% of the deaths were in this age group, according to Shittu et al.[9] As  
58 241 well as in the 2004 Nepal outbreak. [10] What may explain these results is that these age groups are

242 more exposed to known sources of infection than others. Females are slightly more affected, but there  
243 is no statistical significance for the incidence rates related to sex. This is due to the fact that cholera is  
244 an infectious disease. Data from Bangladesh confirm this finding.[11]

245 The previous outbreak in Syria does not appear to be linked to tap water contamination, but rather to  
246 potential sources such as uncontrolled well water and contaminated vegetables, similar to outbreaks in  
247 other countries like Yemen and Nigeria. [7,9]

248 The association of severe watery diarrhea with nausea and vomiting in many unmanaged cases worsens  
249 the situation and leads the patient to dehydration and electrolyte disturbance, which may be dangerous  
250 in many cases. Only a few studies in the medical literature have highlighted this association, including  
251 the study that highlighted the AWD during the 2017-2019 Rohingya crisis in Cox's Bazar, Bangladesh.  
252 [10]

253 We relied on case management based on what was previously known. We determined the amount and  
254 type of fluid resuscitation according to the level of volume depletion. Mild cases, which constitute most  
255 cases, were treated with oral rehydration. As for moderate and severe cases, urgent intravenous  
256 rehydration through Lactated Ringer solution or isotonic sodium chloride solution was the key to  
257 restoring circulation. Nevertheless, antibiotics were also considered in many patients, and electrolyte  
258 replacement in selective patients. [12]

259 38.7% of patients experienced significant complications after being diagnosed with AWD. The most  
260 common complications were electrolyte imbalance (28.2%) and severe dehydration (16.3%). Other  
261 complications, such as acute kidney injury, volume shock, and hypoglycemia, occurred in smaller  
262 numbers. Additionally, only a small percentage of patients (0.4%) died while in the hospital. This is  
263 consistent with outbreaks in other countries. Iraq, for instance, confirmed 3,063 cholera cases and 19  
264 (0.6%) deaths, while Lebanon announced 5,372 confirmed and suspected cholera cases with 23 (0.4%)  
265 deaths. [3]

266 This study has several limitations that impact the generalizability and validity of the findings. Firstly,  
267 the limited sample size, as the study was conducted at AUH, may not accurately represent all cases of  
268 AWD in Syria. Additionally, selection bias was introduced as only cases admitted to the hospital were  
269 included, potentially skewing the results. The lack of long-term follow-up limited the assessment of  
270 outcomes beyond 30 days post-discharge. The study was limited to a specific region in Syria and may  
271 not be applicable to other regions with different healthcare settings, demographics, and environmental  
272 factors.

## 273 **Conclusion**

274 This study has yielded descriptive results reminiscent of studies conducted during prior AWD outbreaks  
275 in developing countries like Yemen, Nigeria, and Lebanon. We have outlined the sources of infection,  
276 including contaminated well water and vegetables. Regrettably, we observed a stagnation in outcomes,  
277 with no discernible improvement in terms of morbidity or mortality compared to past outbreaks.  
278 Consequently, it is imperative that future research endeavors delve deeper into the risk factors that  
279 contribute to the proliferation and severity of the disease, as well as explore optimal management  
280 strategies.

281 **Competing interests** None declared.

282 **Patient consent for publication** Not required.

283 **Supplementary Files Description**

284 Supplementary File A Data Collection Acute Watery Diarrhea Study Sheet.docx

285 Supplementary File B Subgroups Age Analysis.docx

## 286 **Data availability statement**

287 The creation of a dataset consisting of over a thousand patients with AWD during the 2022 cholera  
 288 outbreak in Aleppo, Syria, along with detailed patient observations, is of great significance. Through  
 289 the documentation and analysis of this extensive dataset, we are better equipped to comprehend the  
 290 characteristics, trends, and outcomes of cholera cases during this specific outbreak. This dataset can  
 291 serve as a valuable resource for public health officials, researchers, and healthcare providers as they  
 292 develop more effective strategies for the prevention, treatment, and control of cholera in similar  
 293 settings. The dataset is accessible through the corresponding author. We encourage any research group  
 294 interested in utilizing this data to submit a research proposal outlining background information,  
 295 research questions, methods, and authorship for potential collaborations. All research proposals will  
 296 undergo review by a scientific committee. Furthermore, proper citation is required when referencing  
 297 or using this research data in order to acknowledge the source and credit the original researchers and  
 298 contributors. Adherence to these guidelines upholds transparency, ethics, and integrity in the  
 299 utilization of the valuable data gathered and analyzed in this study.

## 300 **Funding**

301 This research received no specific grant from any funding agency in the public, commercial or not-for-  
 302 profit sectors.

## 303 **Authors contributions**

304 **Ahmad Yamen Arnaout** played a key role in coordinating the study, designing the study, developing the  
 305 methodology, validating the findings, conducting data analysis, interpreting the data, and contributing to the  
 306 original draft of the manuscript, as well as review of the final version. **Yaman Nerabani** contributed to the  
 307 writing of the original draft and provided critical feedback during the manuscript review process. **Mohamad**  
 308 **Nabhan Sawas** was involved in data collection, data cleaning, writing the original draft, and reviewing the  
 309 manuscript. **Tala Jouma Alhejazi** was responsible for writing the original draft of the manuscript and  
 310 contributing to data interpretation. **Mohamad Ali Farho** participated in data collection, writing the original  
 311 draft, and reviewing the manuscript. **Hassan Alshaker, and Khaled Arnaout** provided input in writing the  
 312 original draft and contributed to data interpretation. **Baraa Shebli and Mostafa Helou** served as Study  
 313 Coordinators and validated the study. **Bashir Badawi Mobaied, Mohamad Bassel Mouti, Fares Kady, and**  
 314 **Ziad aljarad** provided scientific supervision, validated the study, and critically reviewed the manuscript. The  
 315 **Aleppo University Hospital Team** played a critical role in data collection for this study.

## 316 **Reference**

- 317 1 Mdriq D. Operation Update Report Iraq : Cholera Outbreak. 2023.
- 318 2 Outbreak C, Overview S. Highlights • 498,703. 2022.
- 319 3 Outbreak C, Report S. WHOLE OF SYRIA WHOLE OF SYRIA. 2022.
- 320 4 Centre C, Vandenbroucke JP. Strengthening the reporting of observational studies in  
 321 epidemiology ( STROBE ) statement : guidelines for reporting observational studies. 2007;  
 322 **335**: 20–2.
- 323 5 Saklad M, Rovenstine E, Taylor I. American Society of Anaesthesiologists physical status  
 324 classification. 2011; **55**: 111–5.
- 325 6 S. Chandrasekhar FRS, Laily Noor Ikhsanto jurusan teknik mesin. Guidelines for  
 326 implementation. *Liq Cryst* 2020; **21**: 1–17.

- 1  
2  
3 327 7 Rabaan AA. Cholera : an overview with reference to the Yemen epidemic. 2018.  
4  
5 328 8 Alassar MM, Adegboye OA, Emeto TI, Rahman KM, Olumuyiwa L. Original article Severe  
6 329 dehydration among cholera patients in Yemen : A cohort profile. 2020; **10**: 338–45.  
7  
8 330 9 Shittu OB, Akpan I, Popoola TOS, Oyedepo JA, Ogunshola EO. Epidemiological features of a  
9 331 GIS-supported investigation of cholera outbreak in Abeokuta , Nigeria. 2018; **7**: 1–11.  
10  
11 332 10 Rk M, An S, Sk M. Original Article. 2005; **3**: 138–42.  
12  
13 333 11 Islam T, Khan AI, Khan H, Tanvir NA, Ahmmed F, Afrad MH. Acute Watery Diarrhea  
14 334 Surveillance During the Rohingya Crisis 2017 – 2019 in Cox ' s Bazar , Bangladesh. 2021; **224**:  
15 335 717–24.  
16  
17 336 12 Brandt KG, Maria M, Antunes DC, Alves G. Acute diarrhea : evidence-based management & . *J*  
18 337 *Pediatr (Rio J)* 2015; : 1–8.  
19  
20 338  
21  
22 339  
23  
24 340  
25  
26 341  
27  
28 342  
29  
30 343  
31  
32 344  
33  
34 345  
35  
36 346

**Table 1: Main Characteristics of the Patients**

|                         | AWD Cases | Percent | Total |
|-------------------------|-----------|---------|-------|
| <b>Gender (Male, n)</b> | 493       | 46.5    | 1061  |
| <b>Age Category</b>     |           |         | 1061  |
| <2                      | 206       | 19.4    |       |
| 2 -5                    | 99        | 9.3     |       |
| 5 - 10                  | 86        | 8.1     |       |
| 10 – 18                 | 140       | 13.2    |       |
| 18 -30                  | 146       | 13.8    |       |
| 30 - 60                 | 289       | 27.2    |       |
| >60                     | 95        | 9.0     |       |
| <b>Geographic</b>       |           |         | 1058  |
| Urban life              | 620       | 58.6    |       |
| Rural life              | 426       | 40.3    |       |
| Nomad life              | 12        | 1.1     |       |
| <b>Shock Index (SI)</b> |           |         | 862   |
| Under 0.6               | 52        | 6.0     |       |
| 0.6 ~ 1 normal          | 399       | 46.3    |       |
| 1~ 1.4                  | 268       | 31.1    |       |

|                                                          |                                                |     |      |      |
|----------------------------------------------------------|------------------------------------------------|-----|------|------|
|                                                          | 1.4 – 2                                        | 126 | 14.6 |      |
|                                                          | More than 2                                    | 17  | 2.0  |      |
| <b>ASA</b>                                               |                                                |     |      | 1061 |
|                                                          | ASA I                                          | 789 | 74.4 |      |
|                                                          | ASA II                                         | 224 | 21.1 |      |
|                                                          | ASA III                                        | 42  | 4.0  |      |
|                                                          | ASA IV                                         | 6   | 0.6  |      |
|                                                          | ASA V                                          | 0   |      |      |
| <b>Infection Source<br/>(as reported by<br/>patient)</b> |                                                |     |      | 1061 |
|                                                          | Contaminated<br>Fruits                         | 25  | 2.4  |      |
|                                                          | Contaminated<br>Water                          | 2   | 0.2  |      |
|                                                          | Corn Cobs                                      | 1   | 0.1  |      |
|                                                          | Falafel, peanut<br>and fatteh                  | 15  | 1.4  |      |
|                                                          | Fast Food                                      | 57  | 5.4  |      |
|                                                          | Fish                                           | 1   | 0.1  |      |
|                                                          | Ice cream                                      | 11  | 1.0  |      |
|                                                          | Ice cubes                                      | 15  | 1.4  |      |
|                                                          | Meat                                           | 4   | 0.4  |      |
|                                                          | Milk                                           | 13  | 1.2  |      |
|                                                          | Rice                                           | 1   | 0.1  |      |
|                                                          | Swimming in a<br>Contaminated<br>Pool          | 3   | 0.3  |      |
|                                                          | The infection<br>passed from<br>his\her family | 30  | 2.8  |      |
|                                                          | Vegetables such<br>as parsley and<br>mint      | 136 | 12.8 |      |
|                                                          | Well Water                                     | 79  | 7.4  |      |
|                                                          | Unknown                                        | 668 | 63.0 |      |

**AWD:** Acute Watery Diarrhea, **BMI:** Body Mass Index, **ASA:** American Society of Anesthesiologists Classification.

**ASA I:** Healthy person,

**ASA II:** Mild systemic disease.

**ASA III:** Severe systemic disease.

**ASA IV:** Severe systemic disease that is a constant threat to life.

**ASA IV:** A moribund person who is not expected to survive without the operation.

**ASA V:** A declared brain-dead person whose organs are being removed for donor purposes.

347

348

349

350

**Table 2: Clinical Manifestations and Laboratory Findings**

|                                                      | AWD Cases | Percent | Total |
|------------------------------------------------------|-----------|---------|-------|
| <b>Clinical Presentation in addition to diarrhea</b> |           |         |       |
| Nausea and Vomiting                                  | 781       | 73.6    | 1061  |
| Abdominal cramps                                     | 576       | 54.3    | 1061  |
| Other                                                | 139       | 13.1    | 1061  |
| <b>Severity of dehydration</b>                       |           |         | 1003  |
| Severe                                               | 174       | 17.3    |       |
| Some                                                 | 507       | 50.5    |       |
| None                                                 | 322       | 32.1    |       |
| <b>Laboratory Findings</b>                           |           |         |       |
| <b>Hemoglobin (g/dL)</b>                             |           |         | 845   |
| Less than 10                                         | 197       | 23.3    |       |
| 10 - 12                                              | 243       | 28.8    |       |
| 12 - 17                                              | 387       | 45.8    |       |
| more than 17                                         | 18        | 2.1     |       |
| <b>Platelet (<math>10^3/\mu\text{L}</math>)</b>      |           |         | 821   |
| Less than 15                                         | 3         | 0.4     |       |
| 15 - 30                                              | 6         | 0.7     |       |
| 30 - 50                                              | 4         | 0.5     |       |
| 50 - 150                                             | 50        | 6.1     |       |
| 150 - 450                                            | 636       | 77.5    |       |
| more than 450                                        | 122       | 14.9    |       |
| <b>Serum Creatinine (mg/dl)</b>                      |           |         | 812   |
| less than 0.6                                        | 311       | 38.3    |       |
| 0.6 - 1.3                                            | 344       | 42.4    |       |
| more than 1.3                                        | 157       | 19.3    |       |
| <b>Serum Urea (mg/dl)</b>                            |           |         | 821   |
| 10 - 50                                              | 639       | 77.8    |       |
| more than 50                                         | 182       | 22.2    |       |
| <b>WBC (<math>10^9/\text{L}</math>)</b>              |           |         | 744   |
| less than 4.5                                        | 34        | 4.6     |       |
| 4.5 - 10                                             | 295       | 39.7    |       |
| more than 10                                         | 415       | 55.8    |       |
| <b>Random Glucose (mg/dl)</b>                        |           |         | 579   |
| less than 40                                         | 32        | 5.5     |       |
| 40 - 120                                             | 365       | 63      |       |
| 120 - 200                                            | 150       | 25.9    |       |
| more than 200                                        | 32        | 5.5     |       |
| <b>Serum potassium (mEq/L)</b>                       |           |         | 817   |

|                             |               |     |      |     |
|-----------------------------|---------------|-----|------|-----|
|                             | less than 3.5 | 270 | 33   |     |
|                             | 3.5 - 5       | 516 | 63.2 |     |
|                             | more than 5   | 31  | 3.8  |     |
| <b>Serum Sodium (mEq/L)</b> |               |     |      | 814 |
|                             | less than 135 | 352 | 43.2 |     |
|                             | 135 - 145     | 446 | 54.8 |     |
|                             | more than 145 | 16  | 2    |     |

**AWD:** Acute Watery Diarrhea

**Severity of dehydration:**

Severe (General Inspection: Lethargic, unconscious, floppy, Eyes: Sunken, dry, absent tears, Unable to drink, drinks poorly)

Some (Restless, irritable, Sunken, tears absent, Thirsty, drinks eagerly)

None (General Inspection Well, alert, Skin Pinch Normal, Eyes Normal, tears present, Tongue

Moist, No thirst).

**WBC: Wight Blood Cells**

351

352

353

**Table 3: Patients management**

|                                   | AWD Cases | Percent (of total AWD cases) |
|-----------------------------------|-----------|------------------------------|
| <b>Intravenous Rehydration</b>    |           |                              |
| Lactated Ringer solution.         | 354       | 33.4                         |
| Isotonic sodium chloride solution | 250       | 23.6                         |
| Other                             | 138       | 20.7                         |
| Total                             | 728       | 68.6                         |
| <b>ORS rehydration</b>            | 697       | 65.7                         |
| <b>Antibiotic treatment</b>       |           |                              |
| Total                             | 682       | 64.3                         |
| Tetracycline                      | 7         | 0.7                          |
| Doxycycline                       | 328       | 30.9                         |
| Trimethoprim/sulfamethoxazole     | 2         | 0.2                          |
| Furazolidone                      | 5         | 0.5                          |
| Ciprofloxacin                     | 319       | 30.1                         |
| Ampicillin                        | 0         | 0                            |
| Other                             | 233       | 22                           |
| <b>Potassium supplementation</b>  |           |                              |
| Oral                              | 18        | 1.6                          |
| Intravenous                       | 233       | 22.0                         |
| Potassium-sparing diuretics       | 3         | 0.3                          |
| Total                             | 254       | 23.9                         |

**AWD:** Acute Watery Diarrhea, **ORS:** Oral Rehydration Solution

354

355  
356**Table 4: Outcomes of the Study**

|                                                       | AWD Cases                              | Percent | Total |
|-------------------------------------------------------|----------------------------------------|---------|-------|
| <b>Patient Discharge</b>                              |                                        |         | 1061  |
| Same day with admission                               | 741                                    | 69.8    |       |
| Next day                                              | 32                                     | 3.0     |       |
| After                                                 | 288                                    | 27.1    |       |
| <b>Need for ICU</b>                                   | 10                                     | 0.9     | 1061  |
| <b>Need for Dialysis</b>                              | 9                                      | 1       | 907   |
| <b>Patient Health at discharge*</b>                   |                                        |         | 1061  |
| Good                                                  | 846                                    | 79.7    |       |
| Moderate                                              | 187                                    | 17.6    |       |
| Poor                                                  | 24                                     | 2.3     |       |
| Died before discharge                                 | 4                                      | 0.4     |       |
| <b>Complications at admission and in the hospital</b> |                                        |         |       |
| All                                                   | 411                                    | 38.7    | 1061  |
| Severe Dehydration                                    | 173                                    | 16.3    | 1061  |
| Electrolyte Imbalance                                 | 299                                    | 28.2    | 1061  |
| Acute Kidney Injury                                   | 10                                     | 0.9     | 1061  |
| Shock                                                 | 21                                     | 2       | 1061  |
| Hypoglycemia                                          | 32                                     | 3       | 1061  |
| Other                                                 | 19                                     | 1.8     | 1061  |
| <b>Patient's Health after follow-up</b>               |                                        |         | 1061  |
| Good                                                  | 858                                    | 81.0    |       |
| Moderate                                              | 155                                    | 14.6    |       |
| Poor                                                  | 36                                     | 3.4     |       |
| Die                                                   | 10 (4 in AUB, & 6 in a other hospital) | 0.9     |       |

**AWD:** Acute Watery Diarrhea.

\*: Good health: the patient no longer had any symptoms or mild symptoms from the convalescent stage. Moderate Health: the patient is still suffering from the symptoms of the disease, but without any serious complications or damage to the organs. Poor health: the patient suffers from complications of the disease and his condition is poor and has never improved. **AUB:** Aleppo University Hospital.

357  
358  
359  
360  
361



# Acute Watery Diarrhea Patient Data Collection Form

## Data collection form for Acute Watery

### Diarrhea Patients

#### **Part A: Demographics**

- 1) ID \_\_\_\_\_
- 2) Gender: Male / Female
- 3) Patient Age \_\_\_\_\_
- 4) Geographic
  - Urban life
  - Rural life
  - Nomad life
- 5) Potential Source of Infection \_\_\_\_\_

#### **Part B: Admission details**

##### **1) Admission Date DD/MM/YYYY**

2) Diarrhea Onset before \_\_\_\_\_ days

##### **3) Clinical Presentation**

- Diarrhea**  
how many times in a day? \_\_\_\_\_.
- Vomiting**
- Abdominal cramps**
- Fever**
- Dehydration**
- Other**  
If Other, Please Specify \_\_\_\_\_

#### **4) Chief Complaint was**

#### **5) Assessment of severity of dehydration:**

- **Severe (General Inspection: Lethargic, unconscious, floppy, Eyes: Sunken, dry, tears absent, Unable to drink, drinks poorly)**
- **Some (Restless, irritable, Sunken, tears absent, Thirsty, drinks eagerly)**
- **None (General Inspection Well, alert, Skin Pinch Normal, Eyes Normal, tears present, Tongue Moist, No thirst)**

#### **Part D: Co-morbidities**

- 1) Height \_\_\_\_\_ m
- 2) Weight \_\_\_\_\_ kg
- 3) Patient BMI \_\_\_\_\_ kg/m<sup>2</sup>
- 4) Heart Rate \_\_\_\_\_
- 5) Blood Pressure \_\_\_\_\_
- 7) Shock Index (SI) (heart rate (HR) / systolic blood pressure (SBP) ) \_\_\_\_\_
- 6) ASA Grade (chose number between 1 >>5) \_\_\_\_\_
  - ASA 1: Healthy person. Example: Fit, nonobese (BMI under 30), a nonsmoking patient with good exercise tolerance.
  - ASA 2: well-controlled disease (e.g., treated hypertension, obesity with BMI under 35, frequent social drinker, or cigarette smoker).

- ASA 3: a severe systemic disease that is not life-threatening. (e.g., poorly treated hypertension or diabetes, morbid obesity, chronic renal failure).
- ASA 4: a severe systemic disease that is a constant threat to life.
- ASA 5: A moribund person who is not expected to survive without the intervention.

#### **7) Comorbidities:**

- Diabetes mellitus
- Hypertension requiring medication
- Ischemic heart disease
- Chronic obstructive pulmonary disease (COPD)
- Asthma
- Ulcer disease
- Known liver cirrhosis
- Deep Vein Thrombosis
- Urinary Tract infection
- Chronic immunosuppression
- Cerebrovascular accident
- Chronic kidney disease (on dialysis or GFR <30 mL/min/1.73m<sup>2</sup>)
- Others (18)

If other, please Specify \_\_\_\_\_

#### **8) Past history of COVID-19 infection (within the last 6 months)**

- Yes
- No

Time gap between COVID-19 infection and Cholera Infection (in weeks): \_\_\_\_\_ Weeks

9) Previous open abdominal surgery/laparotomy

- Yes
- No

If Yes, please indicate the cause

\_\_\_\_\_

10) Past Gastrointestinal Surgery

- Yes
- No

If Yes, please indicate the Cause

\_\_\_\_\_

11) Past Medicine History:

- Antacids
- Histamine receptor blockers
- Proton pump inhibitors (PPI)
- Antibiotics (within last month)

If Yes, please specify Antibiotics Group

\_\_\_\_\_

\_\_\_\_\_

- Other
- \_\_\_\_\_

12) Current smoker within 1 year: (even with hookah)

- Active smoker
  - A daily smoker
  - An occasional smoker
- Ex-smoker
- Never smoked

13) Is the patient:

- Not drinking alcohol.

- Drinking alcohol in moderation (2 drinks or less in a day for men and 1 drink or less in a day for women)
- Binge Drinking (consuming 5 or more drinks (male), or 4 or more drinks (female), in about 2 hours.)
- Heavy Alcohol Use (binge drinking on 5 or more days in the past month.)

14) Cholera Vaccine

- Yes
- No

If yes, please specify the type of Vaccine

\_\_\_\_\_

**Part E: Cholera Workup**

1) Diagnosis was made according to:

- Clinically (According to WHO: In an area with a noted cholera epidemic, a patient aged 5 years or older develops acute watery diarrhea, with or without vomiting)**
- Biochemical confirmation and characterization of the isolate.**
- Polymerase chain reaction (PCR) tests.**

2) If Biochemical confirmation and characterization of the isolate was done please tick all that apply

- Stool Examination
- Stool Culture
- Serotyping and Biotyping

If done, Please specify the type

\_\_\_\_\_

- Hematologic Tests
- Metabolic Panel

3) Laboratory findings (If done)

- Hemoglobin (g/dL) \_\_\_\_\_
- Platelet ( $10^3 / \mu\text{L}$ ) \_\_\_\_\_
- Bilirubin Total (mg/dL) \_\_\_\_\_
- Bilirubin direct (mg/dL) \_\_\_\_\_
- AST (U/L) \_\_\_\_\_
- ALT (U/L) \_\_\_\_\_
- Urea (mg/dL) \_\_\_\_\_
- Serum creatinine (mg/dL) \_\_\_\_\_
- Alkaline phosphatase \_\_\_\_\_
- White blood cell count,  $10^9/\text{L}$  \_\_\_\_\_
- K+ \_\_\_\_\_
- Na+ \_\_\_\_\_
- HCO<sub>3</sub><sup>-</sup> \_\_\_\_\_
- Pco<sub>2</sub> \_\_\_\_\_
- Ph \_\_\_\_\_
- Glucose \_\_\_\_\_
- Blood type (ABO +/-) \_\_\_\_\_

**Part F: Treatment & Management**

1) Intravenous Rehydration

- Yes
- No

If yes, please set the volume of intravenous infusion at the day case

\_\_\_\_\_ ml/day case. (example: 2000 ml / day case)

Set the rate of Intravenous Rehydration

\_\_\_\_\_ ml/kg in hours (example; 30ml/kg in first hour then 70 ml / kg in next five hours)

Type of solution

- Lactated Ringer solution.
- Isotonic sodium chloride solution
- Other \_\_\_\_\_

**2) ORS rehydration:**

- 1      Yes  
 2      No

3 **If yes, please set the volume of ORS Solution at the**  
 4 **day case**

5 \_\_\_\_\_ ml/day case. (example: 2000 ml / day  
 6 \_\_\_\_\_  
 7 case)

**Set the rate of Intravenous Rehydration**

8 \_\_\_\_\_  
 9 \_\_\_\_\_ ml/kg in hours (example;  
 10 \_\_\_\_\_  
 11 30ml/kg after each loose stool then 70 ml / kg in next  
 12 five hours)

**3) Antibiotic treatment**

- 15      Yes  
 16      No

17 **If yes, please specify**

- 18      Tetracycline  
 19      Doxycycline  
 20      Trimethoprim and sulfamethoxazole  
 21      Furazolidone  
 22      Ciprofloxacin  
 23      Ampicillin  
 24      Other \_\_\_\_\_  
 25

**Dose**

- 27      Single dose  
 28      Multiple dose

29 \_\_\_\_\_ (for  
 30 example 60 mg / once a day)

**4) Sodium Bicarbonate**

- 32      Yes  
 33      No

34 **If yes, please specify the reason**

**5) Potassium supplementation**

- 37      Yes  
         Oral potassium supplementation  
         Intravenous potassium replacement  
         Potassium-sparing diuretics  
 38      No

39 **If yes, please specify the reason**

**Part G: Follow-up Data at Staying in hospital****1) Patient Discharge**

- 40      Same day with admission  
 41      Next day  
 42      After \_\_\_\_\_ days (example after two  
 43 days)

**2) Did the patient die?**

- 44      Yes  
 45      No

46 **If yes, please specify the reason**

**3) Patient Health at discharge**

- 47      Good  
 48      Moderate  
 49      Bad

**4) Did the patient need ICU care?**

- 50      Yes  
 51      No

52 **If Yes, please describe the reason**

**5) Did the patient need dialysis**

- 53      Yes  
 54      No

55 **If yes, please specify the reason**

**Did the patient have any complication through  
 staying at hospital?**

- 56      Yes  
 57      No

58 **If yes, please specify**

**Part H: Follow-up Data during 30 days**

59 **1) Did the patient have any complication through 30  
 60 days after the discharge?**

- 61      Yes  
 62      No

63 **If yes, please specify** \_\_\_\_\_

64 **2) Did the patient die as a result of a complication?**

- 65      Yes  
 66      No

67 **If Yes, please specify the reason**

68 **3) Any additional pharmacological treatment instituted  
 69 by the medical team after discharge at home (other than  
 70 routine treatment and prescription at discharge)**

- 71      Yes  
 72      No

73 **If Yes, please specify**

74 **4) Patient Health after 30 days from the admission:**

- 75      Good  
 76      Moderate  
 77      Bad

80 **Any Additional Notes:** \_\_\_\_\_

# Supplementary File B Subgroup's analysis

## Symptoms and laboratory findings according to age Class

(3) Vomiting  
Yes (1)  
No (0)

\* Age\_ Classification Crosstabulation

|                                   |        | Age_ Classification          |                    |                      |                       |                      |                       |                   |       |        |
|-----------------------------------|--------|------------------------------|--------------------|----------------------|-----------------------|----------------------|-----------------------|-------------------|-------|--------|
|                                   |        | Age_1 (<2 years)             | Age_1 (2 -5 years) | Age_3 (5 - 10 years) | Age_4 (10 - 18 years) | Age_5 (18 -30 years) | Age_6 (30 - 60 years) | Age_7 (>60 years) | Total |        |
| (3) Vomiting<br>Yes (1)<br>No (0) | 0      | Count                        | 42                 | 18                   | 18                    | 33                   | 50                    | 93                | 26    | 280    |
|                                   |        | % within (3) Vomiting        | 15.0%              | 6.4%                 | 6.4%                  | 11.8%                | 17.9%                 | 33.2%             | 9.3%  | 100.0% |
|                                   |        | Yes (1)                      |                    |                      |                       |                      |                       |                   |       |        |
|                                   |        | No (0)                       |                    |                      |                       |                      |                       |                   |       |        |
|                                   |        | % within Age_ Classification | 20.4%              | 18.2%                | 20.9%                 | 23.6%                | 34.2%                 | 32.2%             | 27.4% | 26.4%  |
|                                   |        | % of Total                   | 4.0%               | 1.7%                 | 1.7%                  | 3.1%                 | 4.7%                  | 8.8%              | 2.5%  | 26.4%  |
| 1                                 |        | Count                        | 164                | 81                   | 68                    | 107                  | 96                    | 196               | 69    | 781    |
|                                   |        | % within (3) Vomiting        | 21.0%              | 10.4%                | 8.7%                  | 13.7%                | 12.3%                 | 25.1%             | 8.8%  | 100.0% |
|                                   |        | Yes (1)                      |                    |                      |                       |                      |                       |                   |       |        |
|                                   |        | No (0)                       |                    |                      |                       |                      |                       |                   |       |        |
|                                   |        | % within Age_ Classification | 79.6%              | 81.8%                | 79.1%                 | 76.4%                | 65.8%                 | 67.8%             | 72.6% | 73.6%  |
|                                   |        | % of Total                   | 15.5%              | 7.6%                 | 6.4%                  | 10.1%                | 9.0%                  | 18.5%             | 6.5%  | 73.6%  |
| Total                             |        | Count                        | 206                | 99                   | 86                    | 140                  | 146                   | 289               | 95    | 1061   |
|                                   |        | % within (3) Vomiting        | 19.4%              | 9.3%                 | 8.1%                  | 13.2%                | 13.8%                 | 27.2%             | 9.0%  | 100.0% |
|                                   |        | Yes (1)                      |                    |                      |                       |                      |                       |                   |       |        |
|                                   | No (0) |                              |                    |                      |                       |                      |                       |                   |       |        |

|                              |        |        |        |        |        |        |        |        |
|------------------------------|--------|--------|--------|--------|--------|--------|--------|--------|
| % within Age_ Classification | 100.0% | 100.0% | 100.0% | 100.0% | 100.0% | 100.0% | 100.0% | 100.0% |
| % of Total                   | 19.4%  | 9.3%   | 8.1%   | 13.2%  | 13.8%  | 27.2%  | 9.0%   | 100.0% |

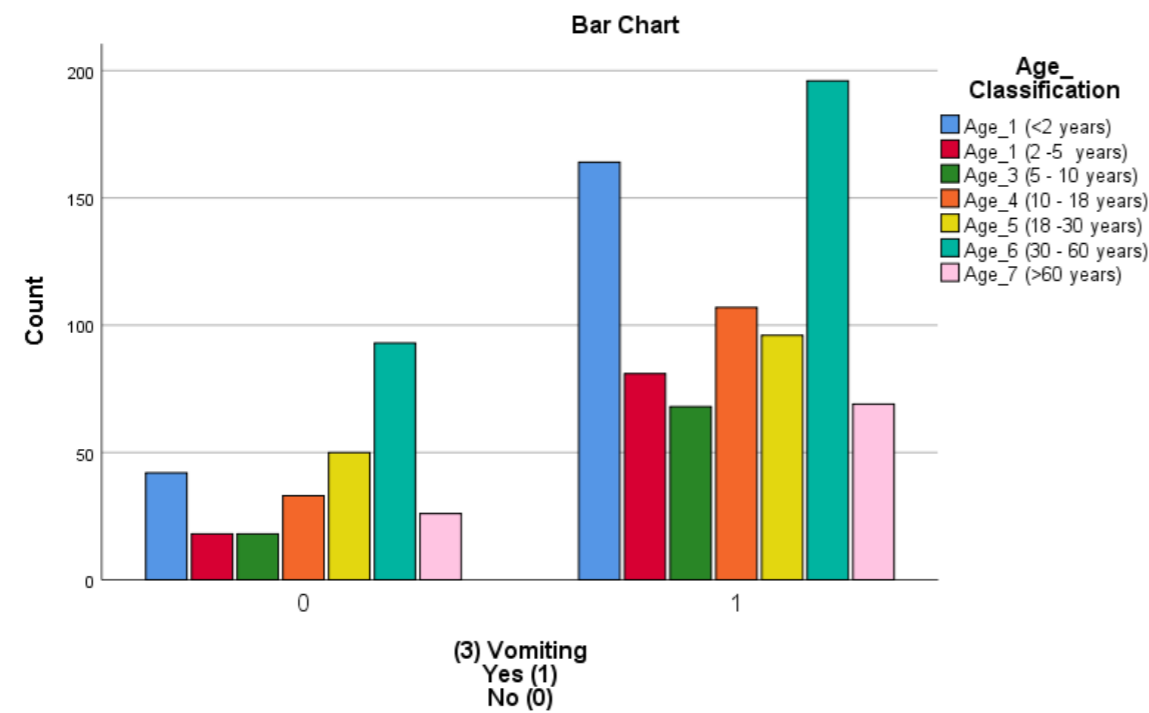

review

**(4) Abdominal cramps  
Yes (1)**

**No (0) \* Age\_ Classification Crosstabulation**

|                                           |                                          | Age_ Classification                      |                    |                      |                       |                      |                       |                   | Total  |        |
|-------------------------------------------|------------------------------------------|------------------------------------------|--------------------|----------------------|-----------------------|----------------------|-----------------------|-------------------|--------|--------|
|                                           |                                          | Age_1 (<2 years)                         | Age_1 (2 -5 years) | Age_3 (5 - 10 years) | Age_4 (10 - 18 years) | Age_5 (18 -30 years) | Age_6 (30 - 60 years) | Age_7 (>60 years) |        |        |
| (4) Abdominal cramps<br>Yes (1)<br>No (0) | 0                                        | Count                                    | 159                | 56                   | 35                    | 60                   | 48                    | 89                | 38     | 485    |
|                                           |                                          | % within (4) Abdominal cramps<br>Yes (1) | 32.8%              | 11.5%                | 7.2%                  | 12.4%                | 9.9%                  | 18.4%             | 7.8%   | 100.0% |
|                                           |                                          | No (0)                                   |                    |                      |                       |                      |                       |                   |        |        |
|                                           |                                          | % within Age_ Classification             | 77.2%              | 56.6%                | 40.7%                 | 42.9%                | 32.9%                 | 30.8%             | 40.0%  | 45.7%  |
|                                           |                                          | % of Total                               | 15.0%              | 5.3%                 | 3.3%                  | 5.7%                 | 4.5%                  | 8.4%              | 3.6%   | 45.7%  |
| 1                                         | Count                                    | 47                                       | 43                 | 51                   | 80                    | 98                   | 200                   | 57                | 576    |        |
|                                           | % within (4) Abdominal cramps<br>Yes (1) | 8.2%                                     | 7.5%               | 8.9%                 | 13.9%                 | 17.0%                | 34.7%                 | 9.9%              | 100.0% |        |
|                                           | No (0)                                   |                                          |                    |                      |                       |                      |                       |                   |        |        |

1  
2  
3  
4  
5  
6  
7  
8  
9  
10  
11  
12  
13  
14  
15  
16  
17  
18  
19  
20  
21  
22  
23  
24  
25  
26  
27  
28  
29  
30  
31  
32  
33  
34  
35  
36  
37  
38  
39  
40  
41  
42  
43  
44  
45  
46  
47  
48  
49  
50  
51  
52  
53  
54  
55  
56  
57  
58  
59  
60

|       |                               |        |        |        |        |        |        |        |        |
|-------|-------------------------------|--------|--------|--------|--------|--------|--------|--------|--------|
|       | % within Age_ Classification  | 22.8%  | 43.4%  | 59.3%  | 57.1%  | 67.1%  | 69.2%  | 60.0%  | 54.3%  |
|       | % of Total                    | 4.4%   | 4.1%   | 4.8%   | 7.5%   | 9.2%   | 18.9%  | 5.4%   | 54.3%  |
| Total | Count                         | 206    | 99     | 86     | 140    | 146    | 289    | 95     | 1061   |
|       | % within (4) Abdominal cramps | 19.4%  | 9.3%   | 8.1%   | 13.2%  | 13.8%  | 27.2%  | 9.0%   | 100.0% |
|       | Yes (1)                       |        |        |        |        |        |        |        |        |
|       | No (0)                        |        |        |        |        |        |        |        |        |
|       | % within Age_ Classification  | 100.0% | 100.0% | 100.0% | 100.0% | 100.0% | 100.0% | 100.0% | 100.0% |
|       | % of Total                    | 19.4%  | 9.3%   | 8.1%   | 13.2%  | 13.8%  | 27.2%  | 9.0%   | 100.0% |

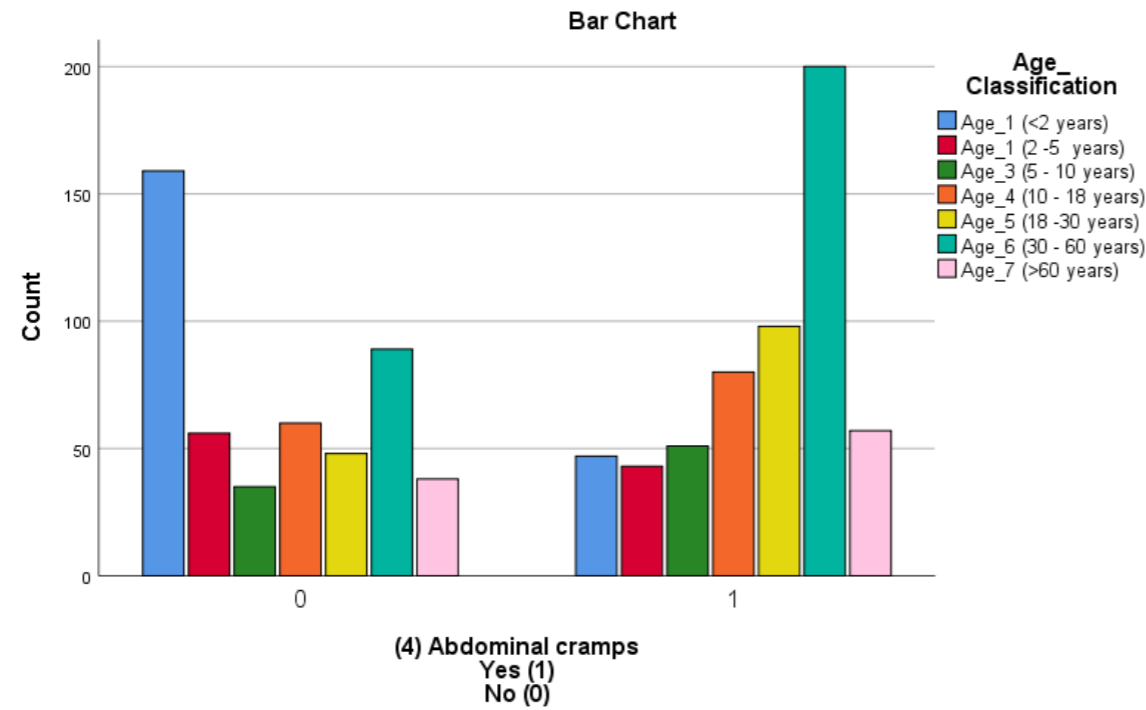

review only

**(5) Fever**  
**Yes (1)**  
**No (0) \* Age\_ Classification Crosstabulation**

|           |   | Age_ Classification |                    |                      |                       |                      |                       |                   | Total  |
|-----------|---|---------------------|--------------------|----------------------|-----------------------|----------------------|-----------------------|-------------------|--------|
|           |   | Age_1 (<2 years)    | Age_1 (2 -5 years) | Age_3 (5 - 10 years) | Age_4 (10 - 18 years) | Age_5 (18 -30 years) | Age_6 (30 - 60 years) | Age_7 (>60 years) |        |
| (5) Fever | 0 | Count               | 172                | 70                   | 55                    | 82                   | 103                   | 216               | 784    |
| Yes (1)   |   | % within (5) Fever  | 21.9%              | 8.9%                 | 7.0%                  | 10.5%                | 13.1%                 | 27.6%             | 100.0% |
| No (0)    |   | Yes (1)             |                    |                      |                       |                      |                       |                   |        |
|           |   | No (0)              |                    |                      |                       |                      |                       |                   |        |

|       |                              |        |        |        |        |        |        |        |        |
|-------|------------------------------|--------|--------|--------|--------|--------|--------|--------|--------|
|       | % within Age_ Classification | 83.5%  | 70.7%  | 64.0%  | 58.6%  | 70.5%  | 74.7%  | 90.5%  | 73.9%  |
|       | % of Total                   | 16.2%  | 6.6%   | 5.2%   | 7.7%   | 9.7%   | 20.4%  | 8.1%   | 73.9%  |
| 1     | Count                        | 34     | 29     | 31     | 58     | 43     | 73     | 9      | 277    |
|       | % within (5) Fever           | 12.3%  | 10.5%  | 11.2%  | 20.9%  | 15.5%  | 26.4%  | 3.2%   | 100.0% |
|       | Yes (1)                      |        |        |        |        |        |        |        |        |
|       | No (0)                       |        |        |        |        |        |        |        |        |
|       | % within Age_ Classification | 16.5%  | 29.3%  | 36.0%  | 41.4%  | 29.5%  | 25.3%  | 9.5%   | 26.1%  |
|       | % of Total                   | 3.2%   | 2.7%   | 2.9%   | 5.5%   | 4.1%   | 6.9%   | 0.8%   | 26.1%  |
| Total | Count                        | 206    | 99     | 86     | 140    | 146    | 289    | 95     | 1061   |
|       | % within (5) Fever           | 19.4%  | 9.3%   | 8.1%   | 13.2%  | 13.8%  | 27.2%  | 9.0%   | 100.0% |
|       | Yes (1)                      |        |        |        |        |        |        |        |        |
|       | No (0)                       |        |        |        |        |        |        |        |        |
|       | % within Age_ Classification | 100.0% | 100.0% | 100.0% | 100.0% | 100.0% | 100.0% | 100.0% | 100.0% |
|       | % of Total                   | 19.4%  | 9.3%   | 8.1%   | 13.2%  | 13.8%  | 27.2%  | 9.0%   | 100.0% |

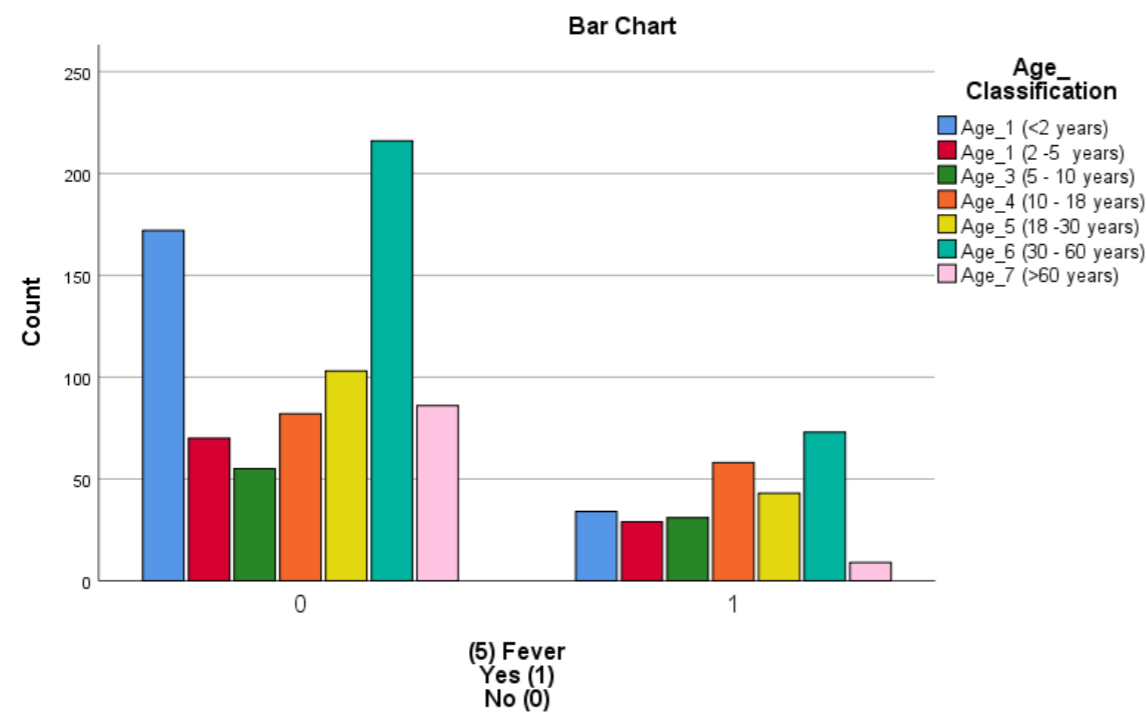

(6) Dehydration

Yes (1)

No (0) \* Age\_ Classification Crosstabulation

Age\_ Classification

Total

|                                      |                              |                              | Age_1 (<2 years) | Age_1 (2 -5 years) | Age_3 (5 - 10 years) | Age_4 (10 - 18 years) | Age_5 (18 -30 years) | Age_6 (30 - 60 years) | Age_7 (>60 years) |        |  |
|--------------------------------------|------------------------------|------------------------------|------------------|--------------------|----------------------|-----------------------|----------------------|-----------------------|-------------------|--------|--|
| (6) Dehydration<br>Yes (1)<br>No (0) | 0                            | Count                        | 146              | 71                 | 69                   | 111                   | 123                  | 210                   | 64                | 794    |  |
|                                      |                              | % within (6) Dehydration     | 18.4%            | 8.9%               | 8.7%                 | 14.0%                 | 15.5%                | 26.4%                 | 8.1%              | 100.0% |  |
|                                      |                              | Yes (1)                      |                  |                    |                      |                       |                      |                       |                   |        |  |
|                                      |                              | No (0)                       |                  |                    |                      |                       |                      |                       |                   |        |  |
|                                      |                              | % within Age_ Classification | 70.9%            | 71.7%              | 80.2%                | 79.3%                 | 84.2%                | 72.7%                 | 67.4%             | 74.8%  |  |
|                                      | % of Total                   | 13.8%                        | 6.7%             | 6.5%               | 10.5%                | 11.6%                 | 19.8%                | 6.0%                  | 74.8%             |        |  |
|                                      | 1                            | Count                        | 60               | 28                 | 17                   | 29                    | 23                   | 79                    | 31                | 267    |  |
|                                      |                              | % within (6) Dehydration     | 22.5%            | 10.5%              | 6.4%                 | 10.9%                 | 8.6%                 | 29.6%                 | 11.6%             | 100.0% |  |
|                                      |                              | Yes (1)                      |                  |                    |                      |                       |                      |                       |                   |        |  |
|                                      |                              | No (0)                       |                  |                    |                      |                       |                      |                       |                   |        |  |
| % within Age_ Classification         |                              | 29.1%                        | 28.3%            | 19.8%              | 20.7%                | 15.8%                 | 27.3%                | 32.6%                 | 25.2%             |        |  |
| % of Total                           | 5.7%                         | 2.6%                         | 1.6%             | 2.7%               | 2.2%                 | 7.4%                  | 2.9%                 | 25.2%                 |                   |        |  |
| Total                                | Count                        | 206                          | 99               | 86                 | 140                  | 146                   | 289                  | 95                    | 1061              |        |  |
|                                      | % within (6) Dehydration     | 19.4%                        | 9.3%             | 8.1%               | 13.2%                | 13.8%                 | 27.2%                | 9.0%                  | 100.0%            |        |  |
|                                      | Yes (1)                      |                              |                  |                    |                      |                       |                      |                       |                   |        |  |
|                                      | No (0)                       |                              |                  |                    |                      |                       |                      |                       |                   |        |  |
|                                      | % within Age_ Classification | 100.0%                       | 100.0%           | 100.0%             | 100.0%               | 100.0%                | 100.0%               | 100.0%                | 100.0%            |        |  |
| % of Total                           | 19.4%                        | 9.3%                         | 8.1%             | 13.2%              | 13.8%                | 27.2%                 | 9.0%                 | 100.0%                |                   |        |  |

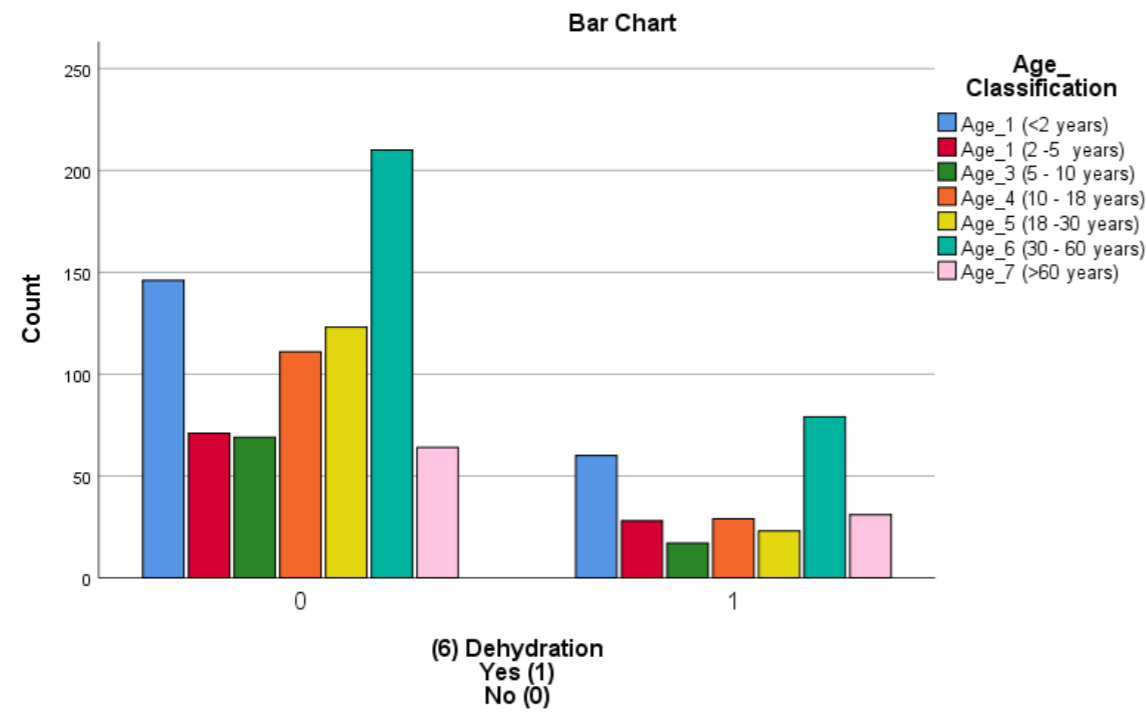



(7) Other  
Yes (1)  
No (0) \* Age\_ Classification Crosstabulation

|                                |            | Age_ Classification          |                    |                      |                       |                      |                       |                   | Total  |        |
|--------------------------------|------------|------------------------------|--------------------|----------------------|-----------------------|----------------------|-----------------------|-------------------|--------|--------|
|                                |            | Age_1 (<2 years)             | Age_1 (2 -5 years) | Age_3 (5 - 10 years) | Age_4 (10 - 18 years) | Age_5 (18 -30 years) | Age_6 (30 - 60 years) | Age_7 (>60 years) | Total  |        |
| (7) Other<br>Yes (1)<br>No (0) | 0          | Count                        | 196                | 98                   | 84                    | 118                  | 117                   | 234               | 75     | 922    |
|                                |            | % within (7) Other           | 21.3%              | 10.6%                | 9.1%                  | 12.8%                | 12.7%                 | 25.4%             | 8.1%   | 100.0% |
|                                |            | Yes (1)                      |                    |                      |                       |                      |                       |                   |        |        |
|                                |            | No (0)                       |                    |                      |                       |                      |                       |                   |        |        |
|                                |            | % within Age_ Classification | 95.1%              | 99.0%                | 97.7%                 | 84.3%                | 80.1%                 | 81.0%             | 78.9%  | 86.9%  |
|                                |            | % of Total                   | 18.5%              | 9.2%                 | 7.9%                  | 11.1%                | 11.0%                 | 22.1%             | 7.1%   | 86.9%  |
| 1                              |            | Count                        | 10                 | 1                    | 2                     | 22                   | 29                    | 55                | 20     | 139    |
|                                |            | % within (7) Other           | 7.2%               | 0.7%                 | 1.4%                  | 15.8%                | 20.9%                 | 39.6%             | 14.4%  | 100.0% |
|                                |            | Yes (1)                      |                    |                      |                       |                      |                       |                   |        |        |
|                                |            | No (0)                       |                    |                      |                       |                      |                       |                   |        |        |
|                                |            | % within Age_ Classification | 4.9%               | 1.0%                 | 2.3%                  | 15.7%                | 19.9%                 | 19.0%             | 21.1%  | 13.1%  |
|                                |            | % of Total                   | 0.9%               | 0.1%                 | 0.2%                  | 2.1%                 | 2.7%                  | 5.2%              | 1.9%   | 13.1%  |
| Total                          |            | Count                        | 206                | 99                   | 86                    | 140                  | 146                   | 289               | 95     | 1061   |
|                                |            | % within (7) Other           | 19.4%              | 9.3%                 | 8.1%                  | 13.2%                | 13.8%                 | 27.2%             | 9.0%   | 100.0% |
|                                |            | Yes (1)                      |                    |                      |                       |                      |                       |                   |        |        |
|                                |            | No (0)                       |                    |                      |                       |                      |                       |                   |        |        |
|                                |            | % within Age_ Classification | 100.0%             | 100.0%               | 100.0%                | 100.0%               | 100.0%                | 100.0%            | 100.0% | 100.0% |
|                                | % of Total | 19.4%                        | 9.3%               | 8.1%                 | 13.2%                 | 13.8%                | 27.2%                 | 9.0%              | 100.0% |        |

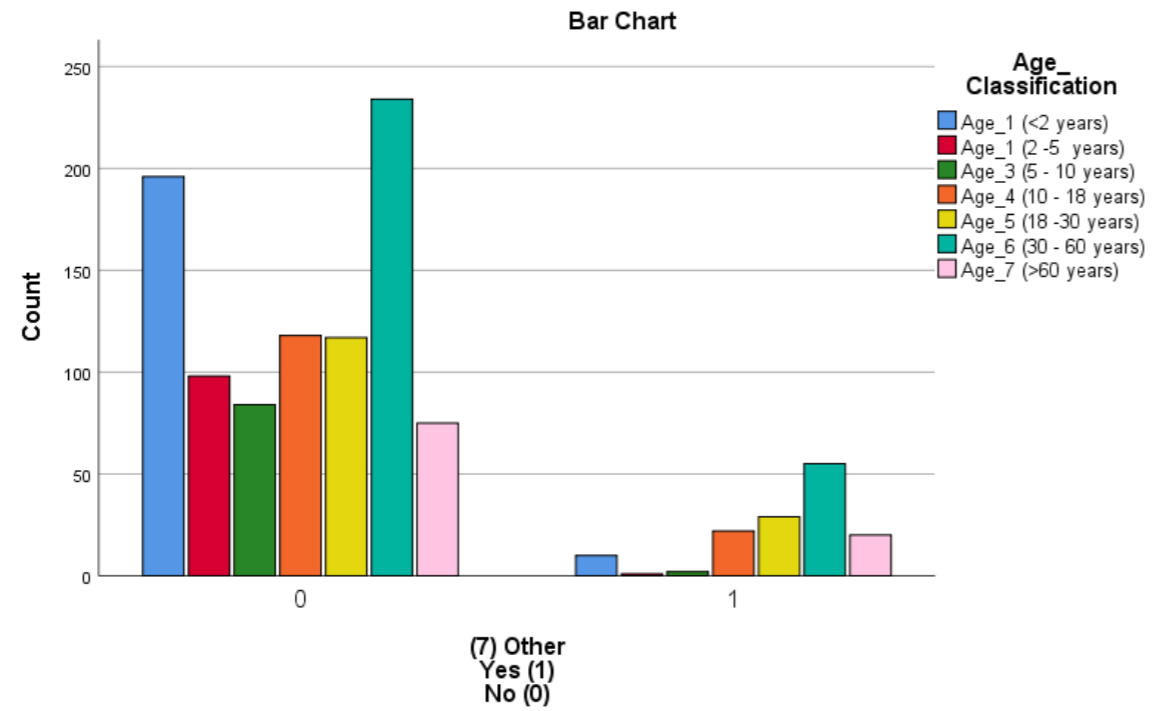

er rev...

severity of dehydration

(1) Severe (General Inspection: Lethargic, unconscious, floppy, Eyes: Sunken, dry, tears absent, Unable to drink, drinks poorly)

(2) Some (Restless, irritable, Sunken, tears absent, Thirsty, drinks eagerly)

(3) None (General Inspection Well, alert, Skin Pinch Normal, Eyes Normal, tears present, Tongue Moist, No thirst) \* Age\_ Classification Crosstabulation

|                         |   | Age_ Classification |                    |                      |                       |                      |                       |                   |       |     |
|-------------------------|---|---------------------|--------------------|----------------------|-----------------------|----------------------|-----------------------|-------------------|-------|-----|
|                         |   | Age_1 (<2 years)    | Age_1 (2 -5 years) | Age_3 (5 - 10 years) | Age_4 (10 - 18 years) | Age_5 (18 -30 years) | Age_6 (30 - 60 years) | Age_7 (>60 years) | Total |     |
| severity of dehydration | 1 | Count               | 41                 | 26                   | 11                    | 15                   | 11                    | 44                | 26    | 174 |

|    |                                 |                                  |       |       |       |       |       |       |       |        |
|----|---------------------------------|----------------------------------|-------|-------|-------|-------|-------|-------|-------|--------|
| 1  |                                 |                                  |       |       |       |       |       |       |       |        |
| 2  |                                 |                                  |       |       |       |       |       |       |       |        |
| 3  |                                 |                                  |       |       |       |       |       |       |       |        |
| 4  | (1) Severe (General Inspection: | % within severity of dehydration | 23.6% | 14.9% | 6.3%  | 8.6%  | 6.3%  | 25.3% | 14.9% | 100.0% |
| 5  | Lethargic, unconscious, floppy, | (1) Severe (General Inspection:  |       |       |       |       |       |       |       |        |
| 6  | Eyes: Sunken, dry,tears absent, | Lethargic, unconscious, floppy,  |       |       |       |       |       |       |       |        |
| 7  | Unable to drink, drinks poorly) | Eyes: Sunken, dry,tears absent,  |       |       |       |       |       |       |       |        |
| 8  | (2) Some (Restless, irritable,  | Unable to drink, drinks poorly)  |       |       |       |       |       |       |       |        |
| 9  | Sunken, tears absent, Thirsty,  | (2) Some (Restless, irritable,   |       |       |       |       |       |       |       |        |
| 10 | drinks eagerly)                 | Sunken, tears absent, Thirsty,   |       |       |       |       |       |       |       |        |
| 11 | (3) None (General Inspection    | drinks eagerly)                  |       |       |       |       |       |       |       |        |
| 12 | Well, alert, Skin Pinch Normal, | (3) None (General Inspection     |       |       |       |       |       |       |       |        |
| 13 | Eyes Normal, tears present,     | Well, alert, Skin Pinch Normal,  |       |       |       |       |       |       |       |        |
| 14 | Tongue Moist, No thirst)        | Eyes Normal, tears present,      |       |       |       |       |       |       |       |        |
| 15 |                                 | Tongue Moist, No thirst)         |       |       |       |       |       |       |       |        |
| 16 |                                 |                                  |       |       |       |       |       |       |       |        |
| 17 |                                 |                                  |       |       |       |       |       |       |       |        |
| 18 |                                 |                                  |       |       |       |       |       |       |       |        |
| 19 |                                 | % within Age_ Classification     | 21.6% | 27.7% | 13.8% | 11.4% | 8.0%  | 15.9% | 28.0% | 17.3%  |
| 20 |                                 | % of Total                       | 4.1%  | 2.6%  | 1.1%  | 1.5%  | 1.1%  | 4.4%  | 2.6%  | 17.3%  |
| 21 |                                 |                                  |       |       |       |       |       |       |       |        |
| 22 | 2                               | Count                            | 90    | 37    | 34    | 64    | 59    | 164   | 59    | 507    |
| 23 |                                 | % within severity of dehydration | 17.8% | 7.3%  | 6.7%  | 12.6% | 11.6% | 32.3% | 11.6% | 100.0% |
| 24 |                                 | (1) Severe (General Inspection:  |       |       |       |       |       |       |       |        |
| 25 |                                 | Lethargic, unconscious, floppy,  |       |       |       |       |       |       |       |        |
| 26 |                                 | Eyes: Sunken, dry,tears absent,  |       |       |       |       |       |       |       |        |
| 27 |                                 | Unable to drink, drinks poorly)  |       |       |       |       |       |       |       |        |
| 28 |                                 | (2) Some (Restless, irritable,   |       |       |       |       |       |       |       |        |
| 29 |                                 | Sunken, tears absent, Thirsty,   |       |       |       |       |       |       |       |        |
| 30 |                                 | drinks eagerly)                  |       |       |       |       |       |       |       |        |
| 31 |                                 | (3) None (General Inspection     |       |       |       |       |       |       |       |        |
| 32 |                                 | Well, alert, Skin Pinch Normal,  |       |       |       |       |       |       |       |        |
| 33 |                                 | Eyes Normal, tears present,      |       |       |       |       |       |       |       |        |
| 34 |                                 | Tongue Moist, No thirst)         |       |       |       |       |       |       |       |        |
| 35 |                                 |                                  |       |       |       |       |       |       |       |        |
| 36 |                                 | % within Age_ Classification     | 47.4% | 39.4% | 42.5% | 48.5% | 43.1% | 59.2% | 63.4% | 50.5%  |
| 37 |                                 | % of Total                       | 9.0%  | 3.7%  | 3.4%  | 6.4%  | 5.9%  | 16.4% | 5.9%  | 50.5%  |
| 38 |                                 |                                  |       |       |       |       |       |       |       |        |
| 39 | 3                               | Count                            | 59    | 31    | 35    | 53    | 67    | 69    | 8     | 322    |
| 40 |                                 |                                  |       |       |       |       |       |       |       |        |
| 41 |                                 |                                  |       |       |       |       |       |       |       |        |
| 42 |                                 |                                  |       |       |       |       |       |       |       |        |
| 43 |                                 |                                  |       |       |       |       |       |       |       |        |
| 44 |                                 |                                  |       |       |       |       |       |       |       |        |
| 45 |                                 |                                  |       |       |       |       |       |       |       |        |
| 46 |                                 |                                  |       |       |       |       |       |       |       |        |
| 47 |                                 |                                  |       |       |       |       |       |       |       |        |
| 48 |                                 |                                  |       |       |       |       |       |       |       |        |
| 49 |                                 |                                  |       |       |       |       |       |       |       |        |
| 50 |                                 |                                  |       |       |       |       |       |       |       |        |
| 51 |                                 |                                  |       |       |       |       |       |       |       |        |
| 52 |                                 |                                  |       |       |       |       |       |       |       |        |
| 53 |                                 |                                  |       |       |       |       |       |       |       |        |
| 54 |                                 |                                  |       |       |       |       |       |       |       |        |
| 55 |                                 |                                  |       |       |       |       |       |       |       |        |
| 56 |                                 |                                  |       |       |       |       |       |       |       |        |
| 57 |                                 |                                  |       |       |       |       |       |       |       |        |
| 58 |                                 |                                  |       |       |       |       |       |       |       |        |
| 59 |                                 |                                  |       |       |       |       |       |       |       |        |
| 60 |                                 |                                  |       |       |       |       |       |       |       |        |

|       |                                                                                                                                          |        |        |        |        |        |        |        |        |
|-------|------------------------------------------------------------------------------------------------------------------------------------------|--------|--------|--------|--------|--------|--------|--------|--------|
|       | % within severity of dehydration                                                                                                         | 18.3%  | 9.6%   | 10.9%  | 16.5%  | 20.8%  | 21.4%  | 2.5%   | 100.0% |
|       | (1) Severe (General Inspection:<br>Lethargic, unconscious, floppy,<br>Eyes: Sunken, dry,tears absent,<br>Unable to drink, drinks poorly) |        |        |        |        |        |        |        |        |
|       | (2) Some (Restless, irritable,<br>Sunken, tears absent, Thirsty,<br>drinks eagerly)                                                      |        |        |        |        |        |        |        |        |
|       | (3) None (General Inspection<br>Well, alert, Skin Pinch Normal,<br>Eyes Normal, tears present,<br>Tongue Moist, No thirst)               |        |        |        |        |        |        |        |        |
|       | % within Age_ Classification                                                                                                             | 31.1%  | 33.0%  | 43.8%  | 40.2%  | 48.9%  | 24.9%  | 8.6%   | 32.1%  |
|       | % of Total                                                                                                                               | 5.9%   | 3.1%   | 3.5%   | 5.3%   | 6.7%   | 6.9%   | 0.8%   | 32.1%  |
| Total | Count                                                                                                                                    | 190    | 94     | 80     | 132    | 137    | 277    | 93     | 1003   |
|       | % within severity of dehydration                                                                                                         | 18.9%  | 9.4%   | 8.0%   | 13.2%  | 13.7%  | 27.6%  | 9.3%   | 100.0% |
|       | (1) Severe (General Inspection:<br>Lethargic, unconscious, floppy,<br>Eyes: Sunken, dry,tears absent,<br>Unable to drink, drinks poorly) |        |        |        |        |        |        |        |        |
|       | (2) Some (Restless, irritable,<br>Sunken, tears absent, Thirsty,<br>drinks eagerly)                                                      |        |        |        |        |        |        |        |        |
|       | (3) None (General Inspection<br>Well, alert, Skin Pinch Normal,<br>Eyes Normal, tears present,<br>Tongue Moist, No thirst)               |        |        |        |        |        |        |        |        |
|       | % within Age_ Classification                                                                                                             | 100.0% | 100.0% | 100.0% | 100.0% | 100.0% | 100.0% | 100.0% | 100.0% |
|       | % of Total                                                                                                                               | 18.9%  | 9.4%   | 8.0%   | 13.2%  | 13.7%  | 27.6%  | 9.3%   | 100.0% |



**severity of dehydration**  
**(1) Severe (General Inspection: Lethargic, unconscious, floppy, Eyes: Sunken, dry, tears absent, Unable to drink, drinks poorly)**  
**(2) Some (Restless, irritable, Sunken, tears absent, Thirsty, drinks eagerly)**  
**(3) None (General Inspection Well, alert, Skin Pinch Normal, Eyes Normal, tears present, Tongue Moist, No thirst)**

er review

**Hemoglobin (g/dL) Class**

- 1: Less than 10**
- 2: 10 - 12**
- 3: 12 - 17**

**4: more than 17 \* Age\_ Classification Crosstabulation**

|                         |                 | Age_ Classification          |                   |                    |                     |                     |                     |                   |       |        |
|-------------------------|-----------------|------------------------------|-------------------|--------------------|---------------------|---------------------|---------------------|-------------------|-------|--------|
|                         |                 | Age_1 (<2 years)             | Age_1 (2-5 years) | Age_3 (5-10 years) | Age_4 (10-18 years) | Age_5 (18-30 years) | Age_6 (30-60 years) | Age_7 (>60 years) | Total |        |
| Hemoglobin (g/dL) Class | 1               | Count                        | 104               | 19                 | 10                  | 5                   | 15                  | 30                | 14    | 197    |
|                         | 1: Less than 10 | % within Hemoglobin (g/dL)   | 52.8%             | 9.6%               | 5.1%                | 2.5%                | 7.6%                | 15.2%             | 7.1%  | 100.0% |
|                         | 2: 10 - 12      | Class                        |                   |                    |                     |                     |                     |                   |       |        |
|                         | 3: 12 - 17      | 1: Less than 10              |                   |                    |                     |                     |                     |                   |       |        |
|                         | 4: more than 17 | 2: 10 - 12                   |                   |                    |                     |                     |                     |                   |       |        |
|                         |                 | 3: 12 - 17                   |                   |                    |                     |                     |                     |                   |       |        |
|                         |                 | 4: more than 17              |                   |                    |                     |                     |                     |                   |       |        |
|                         |                 | % within Age_ Classification | 74.3%             | 29.7%              | 16.9%               | 4.6%                | 11.9%               | 11.5%             | 16.1% | 23.3%  |
|                         |                 | % of Total                   | 12.3%             | 2.2%               | 1.2%                | 0.6%                | 1.8%                | 3.6%              | 1.7%  | 23.3%  |
|                         | 2               | Count                        | 25                | 30                 | 23                  | 40                  | 41                  | 58                | 26    | 243    |

|       |                              |        |        |        |        |        |        |        |        |
|-------|------------------------------|--------|--------|--------|--------|--------|--------|--------|--------|
|       | % within Hemoglobin (g/dL)   | 10.3%  | 12.3%  | 9.5%   | 16.5%  | 16.9%  | 23.9%  | 10.7%  | 100.0% |
|       | Class                        |        |        |        |        |        |        |        |        |
|       | 1: Less than 10              |        |        |        |        |        |        |        |        |
|       | 2: 10 - 12                   |        |        |        |        |        |        |        |        |
|       | 3: 12 - 17                   |        |        |        |        |        |        |        |        |
|       | 4: more than 17              |        |        |        |        |        |        |        |        |
|       | % within Age_ Classification | 17.9%  | 46.9%  | 39.0%  | 37.0%  | 32.5%  | 22.2%  | 29.9%  | 28.8%  |
|       | % of Total                   | 3.0%   | 3.6%   | 2.7%   | 4.7%   | 4.9%   | 6.9%   | 3.1%   | 28.8%  |
| 3     | Count                        | 11     | 15     | 25     | 61     | 67     | 163    | 45     | 387    |
|       | % within Hemoglobin (g/dL)   | 2.8%   | 3.9%   | 6.5%   | 15.8%  | 17.3%  | 42.1%  | 11.6%  | 100.0% |
|       | Class                        |        |        |        |        |        |        |        |        |
|       | 1: Less than 10              |        |        |        |        |        |        |        |        |
|       | 2: 10 - 12                   |        |        |        |        |        |        |        |        |
|       | 3: 12 - 17                   |        |        |        |        |        |        |        |        |
|       | 4: more than 17              |        |        |        |        |        |        |        |        |
|       | % within Age_ Classification | 7.9%   | 23.4%  | 42.4%  | 56.5%  | 53.2%  | 62.5%  | 51.7%  | 45.8%  |
|       | % of Total                   | 1.3%   | 1.8%   | 3.0%   | 7.2%   | 7.9%   | 19.3%  | 5.3%   | 45.8%  |
| 4     | Count                        | 0      | 0      | 1      | 2      | 3      | 10     | 2      | 18     |
|       | % within Hemoglobin (g/dL)   | 0.0%   | 0.0%   | 5.6%   | 11.1%  | 16.7%  | 55.6%  | 11.1%  | 100.0% |
|       | Class                        |        |        |        |        |        |        |        |        |
|       | 1: Less than 10              |        |        |        |        |        |        |        |        |
|       | 2: 10 - 12                   |        |        |        |        |        |        |        |        |
|       | 3: 12 - 17                   |        |        |        |        |        |        |        |        |
|       | 4: more than 17              |        |        |        |        |        |        |        |        |
|       | % within Age_ Classification | 0.0%   | 0.0%   | 1.7%   | 1.9%   | 2.4%   | 3.8%   | 2.3%   | 2.1%   |
|       | % of Total                   | 0.0%   | 0.0%   | 0.1%   | 0.2%   | 0.4%   | 1.2%   | 0.2%   | 2.1%   |
| Total | Count                        | 140    | 64     | 59     | 108    | 126    | 261    | 87     | 845    |
|       | % within Hemoglobin (g/dL)   | 16.6%  | 7.6%   | 7.0%   | 12.8%  | 14.9%  | 30.9%  | 10.3%  | 100.0% |
|       | Class                        |        |        |        |        |        |        |        |        |
|       | 1: Less than 10              |        |        |        |        |        |        |        |        |
|       | 2: 10 - 12                   |        |        |        |        |        |        |        |        |
|       | 3: 12 - 17                   |        |        |        |        |        |        |        |        |
|       | 4: more than 17              |        |        |        |        |        |        |        |        |
|       | % within Age_ Classification | 100.0% | 100.0% | 100.0% | 100.0% | 100.0% | 100.0% | 100.0% | 100.0% |
|       | % of Total                   | 16.6%  | 7.6%   | 7.0%   | 12.8%  | 14.9%  | 30.9%  | 10.3%  | 100.0% |

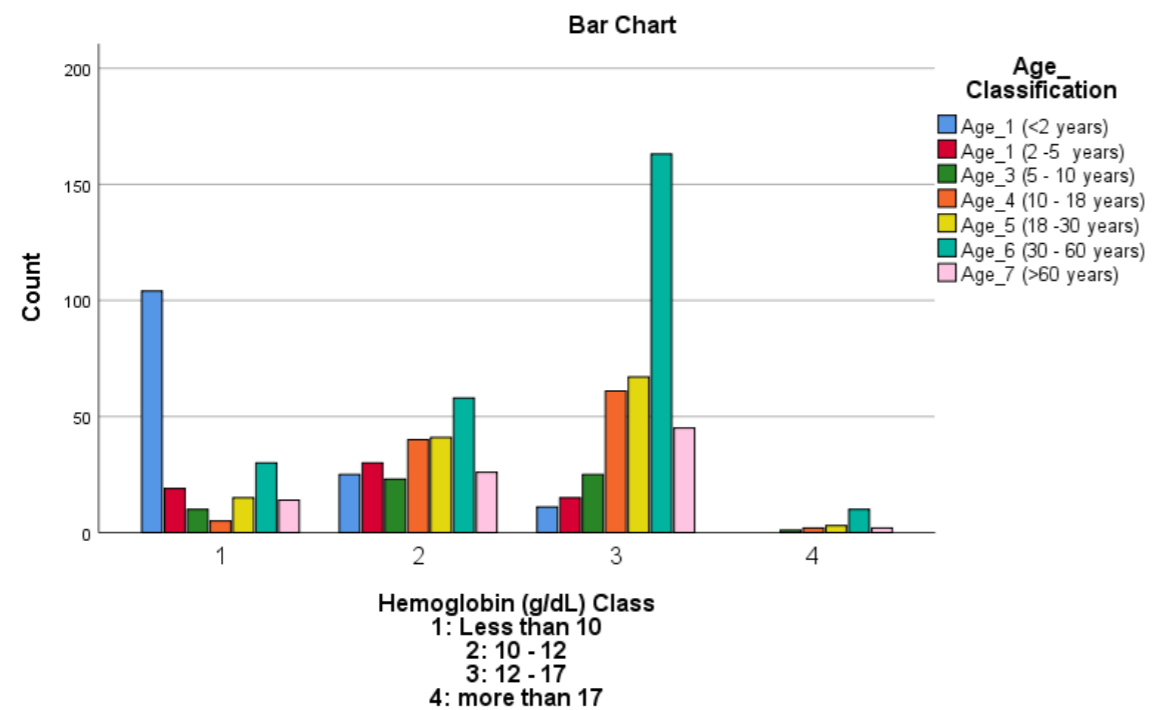

er review

**Platelet Classification**

- 1: Less than 15
- 2: 15 - 30
- 3: 30 - 50
- 4: 50 - 150
- 5: 150 - 450

**6: more than 450 \* Age Classification Crosstabulation**

| Platelet Classification | Count                            | Age Classification |                    |                      |                       |                      |                       |                   | Total  |
|-------------------------|----------------------------------|--------------------|--------------------|----------------------|-----------------------|----------------------|-----------------------|-------------------|--------|
|                         |                                  | Age_1 (<2 years)   | Age_1 (2 -5 years) | Age_3 (5 - 10 years) | Age_4 (10 - 18 years) | Age_5 (18 -30 years) | Age_6 (30 - 60 years) | Age_7 (>60 years) |        |
| 1: Less than 15         | 3                                | 0                  | 0                  | 0                    | 1                     | 0                    | 1                     | 1                 | 3      |
| 2: 15 - 30              | % within Platelet Classification | 0.0%               | 0.0%               | 0.0%                 | 33.3%                 | 0.0%                 | 33.3%                 | 33.3%             | 100.0% |
| 3: 30 - 50              | 1: Less than 15                  |                    |                    |                      |                       |                      |                       |                   |        |
| 4: 50 - 150             | 2: 15 - 30                       |                    |                    |                      |                       |                      |                       |                   |        |
| 5: 150 - 450            | 3: 30 - 50                       |                    |                    |                      |                       |                      |                       |                   |        |
| 6: more than 450        | 4: 50 - 150                      |                    |                    |                      |                       |                      |                       |                   |        |
|                         | 5: 150 - 450                     |                    |                    |                      |                       |                      |                       |                   |        |
|                         | 6: more than 450                 |                    |                    |                      |                       |                      |                       |                   |        |
|                         | % within Age Classification      | 0.0%               | 0.0%               | 0.0%                 | 1.0%                  | 0.0%                 | 0.4%                  | 1.2%              | 0.4%   |

1  
2  
3  
4  
5  
6  
7  
8  
9  
10  
11  
12  
13  
14  
15  
16  
17  
18  
19  
20  
21  
22  
23  
24  
25  
26  
27  
28  
29  
30  
31  
32  
33  
34  
35  
36  
37  
38  
39  
40  
41  
42  
43  
44  
45  
46  
47  
48  
49  
50  
51  
52  
53  
54  
55  
56  
57  
58  
59  
60

|   |                                   |       |      |       |       |       |       |       |        |
|---|-----------------------------------|-------|------|-------|-------|-------|-------|-------|--------|
|   | % of Total                        | 0.0%  | 0.0% | 0.0%  | 0.1%  | 0.0%  | 0.1%  | 0.1%  | 0.4%   |
| 2 | Count                             | 0     | 0    | 1     | 2     | 0     | 2     | 1     | 6      |
|   | % within Platelet_ Classification | 0.0%  | 0.0% | 16.7% | 33.3% | 0.0%  | 33.3% | 16.7% | 100.0% |
|   | 1: Less than 15                   |       |      |       |       |       |       |       |        |
|   | 2: 15 - 30                        |       |      |       |       |       |       |       |        |
|   | 3: 30 - 50                        |       |      |       |       |       |       |       |        |
|   | 4: 50 - 150                       |       |      |       |       |       |       |       |        |
|   | 5: 150 - 450                      |       |      |       |       |       |       |       |        |
|   | 6: more than 450                  |       |      |       |       |       |       |       |        |
|   | % within Age_ Classification      | 0.0%  | 0.0% | 1.8%  | 1.9%  | 0.0%  | 0.8%  | 1.2%  | 0.7%   |
|   | % of Total                        | 0.0%  | 0.0% | 0.1%  | 0.2%  | 0.0%  | 0.2%  | 0.1%  | 0.7%   |
| 3 | Count                             | 0     | 0    | 0     | 1     | 0     | 1     | 2     | 4      |
|   | % within Platelet_ Classification | 0.0%  | 0.0% | 0.0%  | 25.0% | 0.0%  | 25.0% | 50.0% | 100.0% |
|   | 1: Less than 15                   |       |      |       |       |       |       |       |        |
|   | 2: 15 - 30                        |       |      |       |       |       |       |       |        |
|   | 3: 30 - 50                        |       |      |       |       |       |       |       |        |
|   | 4: 50 - 150                       |       |      |       |       |       |       |       |        |
|   | 5: 150 - 450                      |       |      |       |       |       |       |       |        |
|   | 6: more than 450                  |       |      |       |       |       |       |       |        |
|   | % within Age_ Classification      | 0.0%  | 0.0% | 0.0%  | 1.0%  | 0.0%  | 0.4%  | 2.4%  | 0.5%   |
|   | % of Total                        | 0.0%  | 0.0% | 0.0%  | 0.1%  | 0.0%  | 0.1%  | 0.2%  | 0.5%   |
| 4 | Count                             | 4     | 3    | 2     | 8     | 10    | 17    | 6     | 50     |
|   | % within Platelet_ Classification | 8.0%  | 6.0% | 4.0%  | 16.0% | 20.0% | 34.0% | 12.0% | 100.0% |
|   | 1: Less than 15                   |       |      |       |       |       |       |       |        |
|   | 2: 15 - 30                        |       |      |       |       |       |       |       |        |
|   | 3: 30 - 50                        |       |      |       |       |       |       |       |        |
|   | 4: 50 - 150                       |       |      |       |       |       |       |       |        |
|   | 5: 150 - 450                      |       |      |       |       |       |       |       |        |
|   | 6: more than 450                  |       |      |       |       |       |       |       |        |
|   | % within Age_ Classification      | 2.9%  | 4.8% | 3.5%  | 7.7%  | 8.0%  | 6.8%  | 7.1%  | 6.1%   |
|   | % of Total                        | 0.5%  | 0.4% | 0.2%  | 1.0%  | 1.2%  | 2.1%  | 0.7%  | 6.1%   |
| 5 | Count                             | 84    | 41   | 40    | 79    | 106   | 215   | 71    | 636    |
|   | % within Platelet_ Classification | 13.2% | 6.4% | 6.3%  | 12.4% | 16.7% | 33.8% | 11.2% | 100.0% |
|   | 1: Less than 15                   |       |      |       |       |       |       |       |        |
|   | 2: 15 - 30                        |       |      |       |       |       |       |       |        |
|   | 3: 30 - 50                        |       |      |       |       |       |       |       |        |
|   | 4: 50 - 150                       |       |      |       |       |       |       |       |        |
|   | 5: 150 - 450                      |       |      |       |       |       |       |       |        |
|   | 6: more than 450                  |       |      |       |       |       |       |       |        |



1  
2  
3  
4  
5  
6  
7  
8  
9  
10  
11  
12  
13  
14  
15  
16  
17  
18  
19  
20  
21  
22  
23  
24  
25  
26  
27  
28  
29  
30  
31  
32  
33  
34  
35  
36  
37  
38  
39  
40  
41  
42  
43  
44  
45  
46  
47  
48  
49  
50  
51  
52  
53  
54  
55  
56  
57  
58  
59  
60

|       |                                   |        |        |        |        |        |        |        |        |
|-------|-----------------------------------|--------|--------|--------|--------|--------|--------|--------|--------|
|       | % within Age_ Classification      | 61.3%  | 65.1%  | 70.2%  | 76.0%  | 84.8%  | 86.0%  | 83.5%  | 77.5%  |
|       | % of Total                        | 10.2%  | 5.0%   | 4.9%   | 9.6%   | 12.9%  | 26.2%  | 8.6%   | 77.5%  |
| 6     | Count                             | 49     | 19     | 14     | 13     | 9      | 14     | 4      | 122    |
|       | % within Platelet_ Classification | 40.2%  | 15.6%  | 11.5%  | 10.7%  | 7.4%   | 11.5%  | 3.3%   | 100.0% |
|       | 1: Less than 15                   |        |        |        |        |        |        |        |        |
|       | 2: 15 - 30                        |        |        |        |        |        |        |        |        |
|       | 3: 30 - 50                        |        |        |        |        |        |        |        |        |
|       | 4: 50 - 150                       |        |        |        |        |        |        |        |        |
|       | 5: 150 - 450                      |        |        |        |        |        |        |        |        |
|       | 6: more than 450                  |        |        |        |        |        |        |        |        |
|       | % within Age_ Classification      | 35.8%  | 30.2%  | 24.6%  | 12.5%  | 7.2%   | 5.6%   | 4.7%   | 14.9%  |
|       | % of Total                        | 6.0%   | 2.3%   | 1.7%   | 1.6%   | 1.1%   | 1.7%   | 0.5%   | 14.9%  |
| Total | Count                             | 137    | 63     | 57     | 104    | 125    | 250    | 85     | 821    |
|       | % within Platelet_ Classification | 16.7%  | 7.7%   | 6.9%   | 12.7%  | 15.2%  | 30.5%  | 10.4%  | 100.0% |
|       | 1: Less than 15                   |        |        |        |        |        |        |        |        |
|       | 2: 15 - 30                        |        |        |        |        |        |        |        |        |
|       | 3: 30 - 50                        |        |        |        |        |        |        |        |        |
|       | 4: 50 - 150                       |        |        |        |        |        |        |        |        |
|       | 5: 150 - 450                      |        |        |        |        |        |        |        |        |
|       | 6: more than 450                  |        |        |        |        |        |        |        |        |
|       | % within Age_ Classification      | 100.0% | 100.0% | 100.0% | 100.0% | 100.0% | 100.0% | 100.0% | 100.0% |
|       | % of Total                        | 16.7%  | 7.7%   | 6.9%   | 12.7%  | 15.2%  | 30.5%  | 10.4%  | 100.0% |

view only

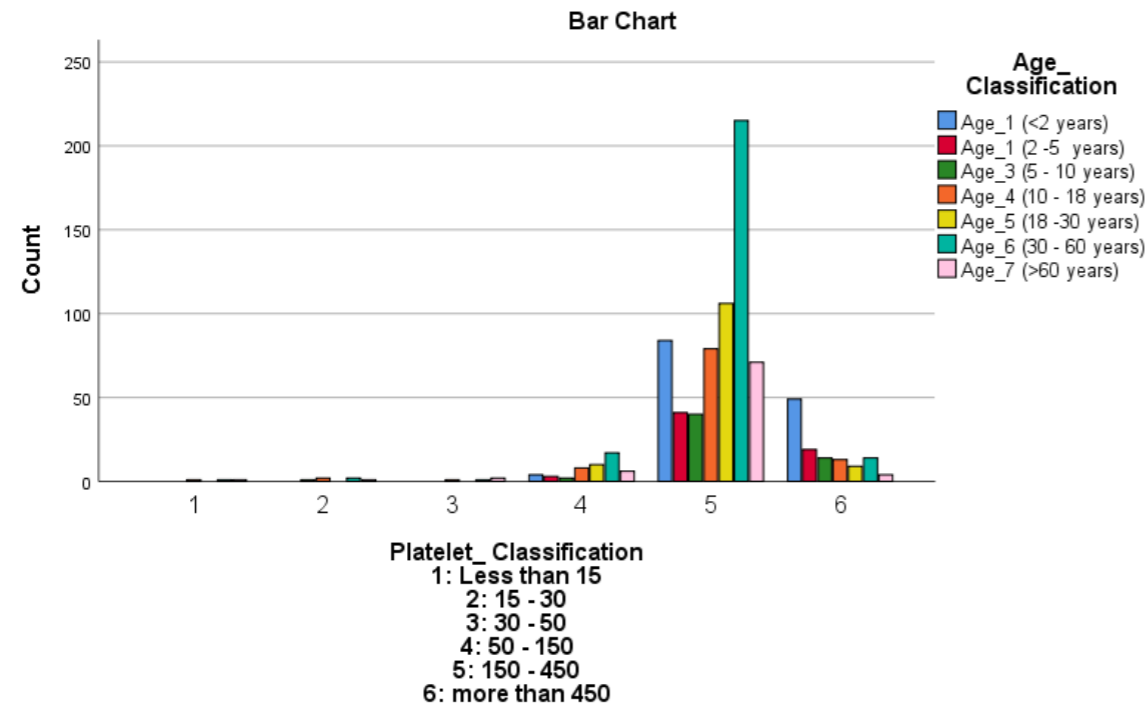

**Serum Creatinine Classification**

1: less than 0.6

2: 0.6 - 1.3

**3: more than 1.3 \* Age\_ Classification Crosstabulation**

|                                 |                  | Age_ Classification          |                    |                      |                       |                      |                       |                   |       |        |
|---------------------------------|------------------|------------------------------|--------------------|----------------------|-----------------------|----------------------|-----------------------|-------------------|-------|--------|
|                                 |                  | Age_1 (<2 years)             | Age_1 (2 -5 years) | Age_3 (5 - 10 years) | Age_4 (10 - 18 years) | Age_5 (18 -30 years) | Age_6 (30 - 60 years) | Age_7 (>60 years) | Total |        |
| Serum Creatinine_Classification | 1                | Count                        | 93                 | 40                   | 28                    | 48                   | 41                    | 54                | 7     | 311    |
|                                 | 1: less than 0.6 | % within Serum               | 29.9%              | 12.9%                | 9.0%                  | 15.4%                | 13.2%                 | 17.4%             | 2.3%  | 100.0% |
|                                 | 2: 0.6 - 1.3     | Count                        |                    |                      |                       |                      |                       |                   |       |        |
|                                 | 3: more than 1.3 | Count                        |                    |                      |                       |                      |                       |                   |       |        |
|                                 |                  | % within Age_ Classification | 68.9%              | 65.6%                | 53.8%                 | 44.0%                | 36.0%                 | 20.9%             | 8.4%  | 38.3%  |
|                                 | % of Total       | 11.5%                        | 4.9%               | 3.4%                 | 5.9%                  | 5.0%                 | 6.7%                  | 0.9%              | 38.3% |        |
| 2                               | Count            | 34                           | 14                 | 16                   | 50                    | 63                   | 135                   | 32                | 344   |        |

|  |       |                             |        |        |        |        |        |        |        |        |
|--|-------|-----------------------------|--------|--------|--------|--------|--------|--------|--------|--------|
|  |       | % within Serum              | 9.9%   | 4.1%   | 4.7%   | 14.5%  | 18.3%  | 39.2%  | 9.3%   | 100.0% |
|  |       | Creatinine_Classification   |        |        |        |        |        |        |        |        |
|  |       | 1: less than 0.6            |        |        |        |        |        |        |        |        |
|  |       | 2: 0.6 - 1.3                |        |        |        |        |        |        |        |        |
|  |       | 3: more than 1.3            |        |        |        |        |        |        |        |        |
|  |       | % within Age_Classification | 25.2%  | 23.0%  | 30.8%  | 45.9%  | 55.3%  | 52.3%  | 38.6%  | 42.4%  |
|  |       | % of Total                  | 4.2%   | 1.7%   | 2.0%   | 6.2%   | 7.8%   | 16.6%  | 3.9%   | 42.4%  |
|  | 3     | Count                       | 8      | 7      | 8      | 11     | 10     | 69     | 44     | 157    |
|  |       | % within Serum              | 5.1%   | 4.5%   | 5.1%   | 7.0%   | 6.4%   | 43.9%  | 28.0%  | 100.0% |
|  |       | Creatinine_Classification   |        |        |        |        |        |        |        |        |
|  |       | 1: less than 0.6            |        |        |        |        |        |        |        |        |
|  |       | 2: 0.6 - 1.3                |        |        |        |        |        |        |        |        |
|  |       | 3: more than 1.3            |        |        |        |        |        |        |        |        |
|  |       | % within Age_Classification | 5.9%   | 11.5%  | 15.4%  | 10.1%  | 8.8%   | 26.7%  | 53.0%  | 19.3%  |
|  |       | % of Total                  | 1.0%   | 0.9%   | 1.0%   | 1.4%   | 1.2%   | 8.5%   | 5.4%   | 19.3%  |
|  | Total | Count                       | 135    | 61     | 52     | 109    | 114    | 258    | 83     | 812    |
|  |       | % within Serum              | 16.6%  | 7.5%   | 6.4%   | 13.4%  | 14.0%  | 31.8%  | 10.2%  | 100.0% |
|  |       | Creatinine_Classification   |        |        |        |        |        |        |        |        |
|  |       | 1: less than 0.6            |        |        |        |        |        |        |        |        |
|  |       | 2: 0.6 - 1.3                |        |        |        |        |        |        |        |        |
|  |       | 3: more than 1.3            |        |        |        |        |        |        |        |        |
|  |       | % within Age_Classification | 100.0% | 100.0% | 100.0% | 100.0% | 100.0% | 100.0% | 100.0% | 100.0% |
|  |       | % of Total                  | 16.6%  | 7.5%   | 6.4%   | 13.4%  | 14.0%  | 31.8%  | 10.2%  | 100.0% |



**Urea\_Class**

1: 10 - 50

2: more than 50 \* Age\_ Classification Crosstabulation

|                                                   |                              | Age_ Classification          |                   |                    |                     |                     |                     |                   |            |        |
|---------------------------------------------------|------------------------------|------------------------------|-------------------|--------------------|---------------------|---------------------|---------------------|-------------------|------------|--------|
|                                                   |                              | Age_1 (<2 years)             | Age_1 (2-5 years) | Age_3 (5-10 years) | Age_4 (10-18 years) | Age_5 (18-30 years) | Age_6 (30-60 years) | Age_7 (>60 years) | Total      |        |
| Urea_Class<br>1:<br>10 - 50<br>2:<br>more than 50 | 1                            | Count                        | 113               | 42                 | 36                  | 90                  | 110                 | 208               | 40         | 639    |
|                                                   |                              | % within Urea_Class          | 17.7%             | 6.6%               | 5.6%                | 14.1%               | 17.2%               | 32.6%             | 6.3%       | 100.0% |
|                                                   |                              | 1: 10 - 50                   |                   |                    |                     |                     |                     |                   |            |        |
|                                                   |                              | 2: more than 50              |                   |                    |                     |                     |                     |                   |            |        |
|                                                   |                              | % within Age_ Classification | 81.9%             | 68.9%              | 70.6%               | 84.1%               | 94.0%               | 79.1%             | 47.6%      | 77.8%  |
|                                                   |                              | % of Total                   | 13.8%             | 5.1%               | 4.4%                | 11.0%               | 13.4%               | 25.3%             | 4.9%       | 77.8%  |
| 2                                                 | Count                        | 25                           | 19                | 15                 | 17                  | 7                   | 55                  | 44                | 182        |        |
|                                                   | % within Urea_Class          | 13.7%                        | 10.4%             | 8.2%               | 9.3%                | 3.8%                | 30.2%               | 24.2%             | 100.0%     |        |
|                                                   | 1: 10 - 50                   |                              |                   |                    |                     |                     |                     |                   |            |        |
|                                                   | 2: more than 50              |                              |                   |                    |                     |                     |                     |                   |            |        |
|                                                   | % within Age_ Classification | 18.1%                        | 31.1%             | 29.4%              | 15.9%               | 6.0%                | 20.9%               | 52.4%             | 22.2%      |        |
|                                                   | % of Total                   | 3.0%                         | 2.3%              | 1.8%               | 2.1%                | 0.9%                | 6.7%                | 5.4%              | 22.2%      |        |
| <b>Total</b>                                      | <b>Count</b>                 | <b>138</b>                   | <b>61</b>         | <b>51</b>          | <b>107</b>          | <b>117</b>          | <b>263</b>          | <b>84</b>         | <b>821</b> |        |

|                             |        |        |        |        |        |        |        |        |
|-----------------------------|--------|--------|--------|--------|--------|--------|--------|--------|
| % within Urea_Class         | 16.8%  | 7.4%   | 6.2%   | 13.0%  | 14.3%  | 32.0%  | 10.2%  | 100.0% |
| 1: 10 - 50                  |        |        |        |        |        |        |        |        |
| 2: more than 50             |        |        |        |        |        |        |        |        |
| % within Age_Classification | 100.0% | 100.0% | 100.0% | 100.0% | 100.0% | 100.0% | 100.0% | 100.0% |
| % of Total                  | 16.8%  | 7.4%   | 6.2%   | 13.0%  | 14.3%  | 32.0%  | 10.2%  | 100.0% |

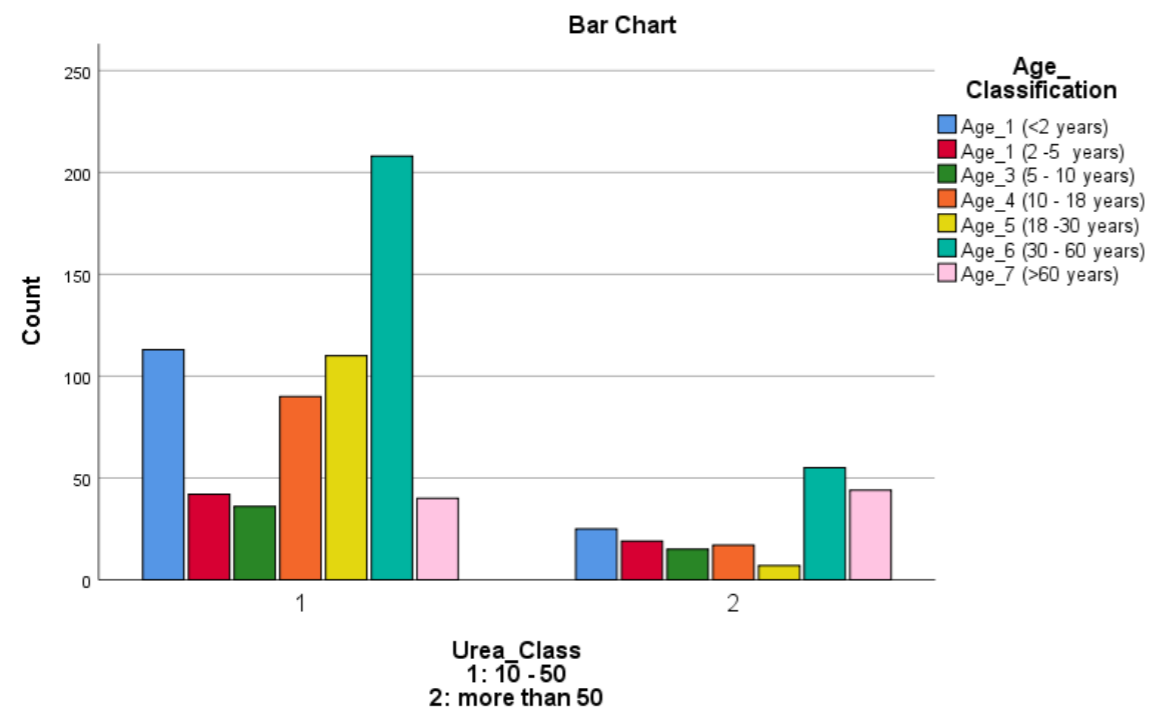

review only

**WBC\_Class**  
**1: less than 4.5**  
**2: 4.5 - 10**  
**3: more than 10 \* Age\_Classification Crosstabulation**

| WBC_Class        | Age_Classification          | Count              | Age_1 (<2 years) | Age_1 (2 - 5 years) | Age_3 (5 - 10 years) | Age_4 (10 - 18 years) | Age_5 (18 - 30 years) | Age_6 (30 - 60 years) | Age_7 (>60 years) | Total  |
|------------------|-----------------------------|--------------------|------------------|---------------------|----------------------|-----------------------|-----------------------|-----------------------|-------------------|--------|
|                  |                             |                    |                  |                     |                      |                       |                       |                       |                   |        |
| 1: less than 4.5 | 1                           | 34                 | 4                | 2                   | 3                    | 6                     | 5                     | 12                    | 2                 | 34     |
| 2: 4.5 - 10      | 1: less than 4.5            | % within WBC_Class | 11.8%            | 5.9%                | 8.8%                 | 17.6%                 | 14.7%                 | 35.3%                 | 5.9%              | 100.0% |
| 3: more than 10  | 2: 4.5 - 10                 |                    |                  |                     |                      |                       |                       |                       |                   |        |
|                  | 3: more than 10             |                    |                  |                     |                      |                       |                       |                       |                   |        |
|                  | % within Age_Classification |                    | 3.6%             | 4.1%                | 5.8%                 | 6.6%                  | 4.4%                  | 4.8%                  | 2.5%              | 4.6%   |

|       |   |                             |        |        |        |        |        |        |        |        |
|-------|---|-----------------------------|--------|--------|--------|--------|--------|--------|--------|--------|
|       |   | % of Total                  | 0.5%   | 0.3%   | 0.4%   | 0.8%   | 0.7%   | 1.6%   | 0.3%   | 4.6%   |
|       | 2 | Count                       | 32     | 17     | 14     | 34     | 65     | 107    | 26     | 295    |
|       |   | % within WBC_Class          | 10.8%  | 5.8%   | 4.7%   | 11.5%  | 22.0%  | 36.3%  | 8.8%   | 100.0% |
|       |   | 1: less than 4.5            |        |        |        |        |        |        |        |        |
|       |   | 2: 4.5 - 10                 |        |        |        |        |        |        |        |        |
|       |   | 3: more than 10             |        |        |        |        |        |        |        |        |
|       |   | % within Age_Classification | 29.1%  | 34.7%  | 26.9%  | 37.4%  | 57.0%  | 43.0%  | 32.9%  | 39.7%  |
|       |   | % of Total                  | 4.3%   | 2.3%   | 1.9%   | 4.6%   | 8.7%   | 14.4%  | 3.5%   | 39.7%  |
|       | 3 | Count                       | 74     | 30     | 35     | 51     | 44     | 130    | 51     | 415    |
|       |   | % within WBC_Class          | 17.8%  | 7.2%   | 8.4%   | 12.3%  | 10.6%  | 31.3%  | 12.3%  | 100.0% |
|       |   | 1: less than 4.5            |        |        |        |        |        |        |        |        |
|       |   | 2: 4.5 - 10                 |        |        |        |        |        |        |        |        |
|       |   | 3: more than 10             |        |        |        |        |        |        |        |        |
|       |   | % within Age_Classification | 67.3%  | 61.2%  | 67.3%  | 56.0%  | 38.6%  | 52.2%  | 64.6%  | 55.8%  |
|       |   | % of Total                  | 9.9%   | 4.0%   | 4.7%   | 6.9%   | 5.9%   | 17.5%  | 6.9%   | 55.8%  |
| Total |   | Count                       | 110    | 49     | 52     | 91     | 114    | 249    | 79     | 744    |
|       |   | % within WBC_Class          | 14.8%  | 6.6%   | 7.0%   | 12.2%  | 15.3%  | 33.5%  | 10.6%  | 100.0% |
|       |   | 1: less than 4.5            |        |        |        |        |        |        |        |        |
|       |   | 2: 4.5 - 10                 |        |        |        |        |        |        |        |        |
|       |   | 3: more than 10             |        |        |        |        |        |        |        |        |
|       |   | % within Age_Classification | 100.0% | 100.0% | 100.0% | 100.0% | 100.0% | 100.0% | 100.0% | 100.0% |
|       |   | % of Total                  | 14.8%  | 6.6%   | 7.0%   | 12.2%  | 15.3%  | 33.5%  | 10.6%  | 100.0% |

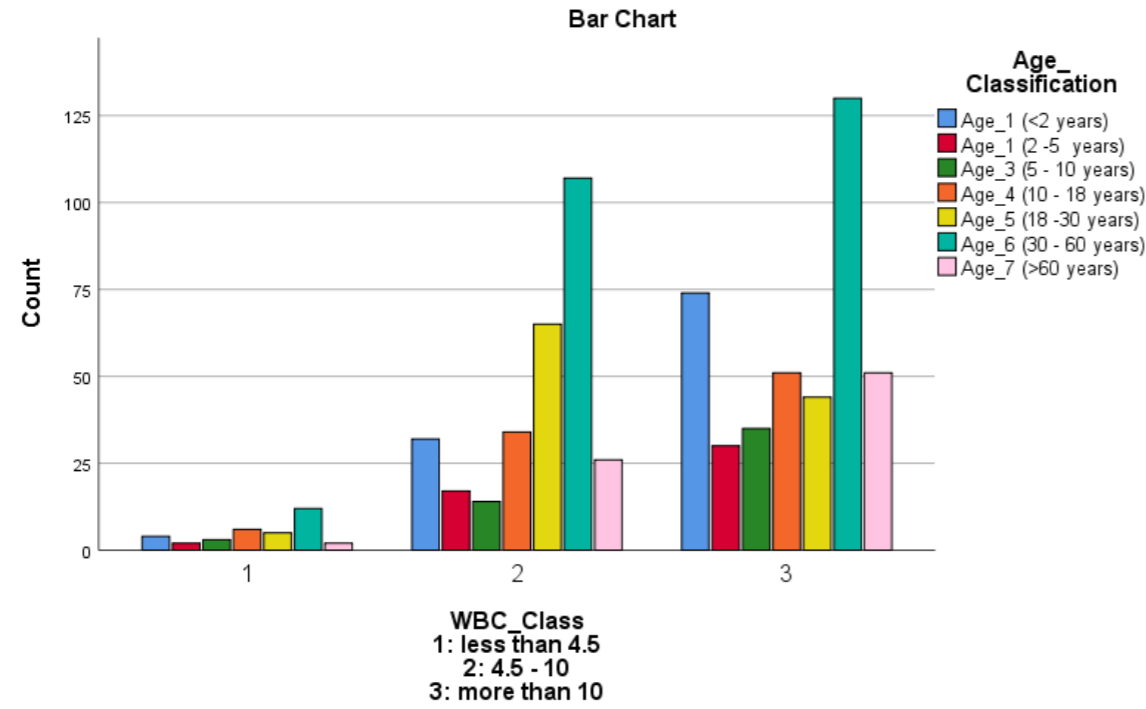

er review

**RandomGlucose\_Class**

1: less than 70  
2: 70 - 120  
3: 120 - 200  
4: more than 200

**4: more than 200 \* Age Classification Crosstabulation**

|                     |                  | Age Classification           |                   |                    |                     |                     |                     |                   |       |        |
|---------------------|------------------|------------------------------|-------------------|--------------------|---------------------|---------------------|---------------------|-------------------|-------|--------|
|                     |                  | Age_1 (<2 years)             | Age_1 (2-5 years) | Age_3 (5-10 years) | Age_4 (10-18 years) | Age_5 (18-30 years) | Age_6 (30-60 years) | Age_7 (>60 years) | Total |        |
| RandomGlucose_Class | 1                | Count                        | 7                 | 1                  | 1                   | 4                   | 6                   | 9                 | 4     | 32     |
|                     |                  | % within RandomGlucose_Class | 21.9%             | 3.1%               | 3.1%                | 12.5%               | 18.8%               | 28.1%             | 12.5% | 100.0% |
|                     | 1: less than 70  |                              |                   |                    |                     |                     |                     |                   |       |        |
|                     | 2: 70 - 120      |                              |                   |                    |                     |                     |                     |                   |       |        |
|                     | 3: 120 - 200     |                              |                   |                    |                     |                     |                     |                   |       |        |
|                     | 4: more than 200 |                              |                   |                    |                     |                     |                     |                   |       |        |
|                     |                  | % within Age Classification  | 13.5%             | 5.0%               | 6.7%                | 5.6%                | 5.6%                | 3.8%              | 5.1%  | 5.5%   |
|                     |                  | % of Total                   | 1.2%              | 0.2%               | 0.2%                | 0.7%                | 1.0%                | 1.6%              | 0.7%  | 5.5%   |
|                     | 2                | Count                        | 29                | 10                 | 10                  | 56                  | 93                  | 134               | 33    | 365    |

|       |  |                              |        |        |        |        |        |        |        |        |
|-------|--|------------------------------|--------|--------|--------|--------|--------|--------|--------|--------|
|       |  | % within RandomGlucose_Class | 7.9%   | 2.7%   | 2.7%   | 15.3%  | 25.5%  | 36.7%  | 9.0%   | 100.0% |
|       |  | 1: less than 70              |        |        |        |        |        |        |        |        |
|       |  | 2: 70 - 120                  |        |        |        |        |        |        |        |        |
|       |  | 3: 120 - 200                 |        |        |        |        |        |        |        |        |
|       |  | 4: more than 200             |        |        |        |        |        |        |        |        |
|       |  | % within Age_Classification  | 55.8%  | 50.0%  | 66.7%  | 77.8%  | 86.1%  | 57.3%  | 42.3%  | 63.0%  |
|       |  | % of Total                   | 5.0%   | 1.7%   | 1.7%   | 9.7%   | 16.1%  | 23.1%  | 5.7%   | 63.0%  |
| 3     |  | Count                        | 15     | 7      | 4      | 11     | 8      | 74     | 31     | 150    |
|       |  | % within RandomGlucose_Class | 10.0%  | 4.7%   | 2.7%   | 7.3%   | 5.3%   | 49.3%  | 20.7%  | 100.0% |
|       |  | 1: less than 70              |        |        |        |        |        |        |        |        |
|       |  | 2: 70 - 120                  |        |        |        |        |        |        |        |        |
|       |  | 3: 120 - 200                 |        |        |        |        |        |        |        |        |
|       |  | 4: more than 200             |        |        |        |        |        |        |        |        |
|       |  | % within Age_Classification  | 28.8%  | 35.0%  | 26.7%  | 15.3%  | 7.4%   | 31.6%  | 39.7%  | 25.9%  |
|       |  | % of Total                   | 2.6%   | 1.2%   | 0.7%   | 1.9%   | 1.4%   | 12.8%  | 5.4%   | 25.9%  |
| 4     |  | Count                        | 1      | 2      | 0      | 1      | 1      | 17     | 10     | 32     |
|       |  | % within RandomGlucose_Class | 3.1%   | 6.3%   | 0.0%   | 3.1%   | 3.1%   | 53.1%  | 31.3%  | 100.0% |
|       |  | 1: less than 70              |        |        |        |        |        |        |        |        |
|       |  | 2: 70 - 120                  |        |        |        |        |        |        |        |        |
|       |  | 3: 120 - 200                 |        |        |        |        |        |        |        |        |
|       |  | 4: more than 200             |        |        |        |        |        |        |        |        |
|       |  | % within Age_Classification  | 1.9%   | 10.0%  | 0.0%   | 1.4%   | 0.9%   | 7.3%   | 12.8%  | 5.5%   |
|       |  | % of Total                   | 0.2%   | 0.3%   | 0.0%   | 0.2%   | 0.2%   | 2.9%   | 1.7%   | 5.5%   |
| Total |  | Count                        | 52     | 20     | 15     | 72     | 108    | 234    | 78     | 579    |
|       |  | % within RandomGlucose_Class | 9.0%   | 3.5%   | 2.6%   | 12.4%  | 18.7%  | 40.4%  | 13.5%  | 100.0% |
|       |  | 1: less than 70              |        |        |        |        |        |        |        |        |
|       |  | 2: 70 - 120                  |        |        |        |        |        |        |        |        |
|       |  | 3: 120 - 200                 |        |        |        |        |        |        |        |        |
|       |  | 4: more than 200             |        |        |        |        |        |        |        |        |
|       |  | % within Age_Classification  | 100.0% | 100.0% | 100.0% | 100.0% | 100.0% | 100.0% | 100.0% | 100.0% |
|       |  | % of Total                   | 9.0%   | 3.5%   | 2.6%   | 12.4%  | 18.7%  | 40.4%  | 13.5%  | 100.0% |



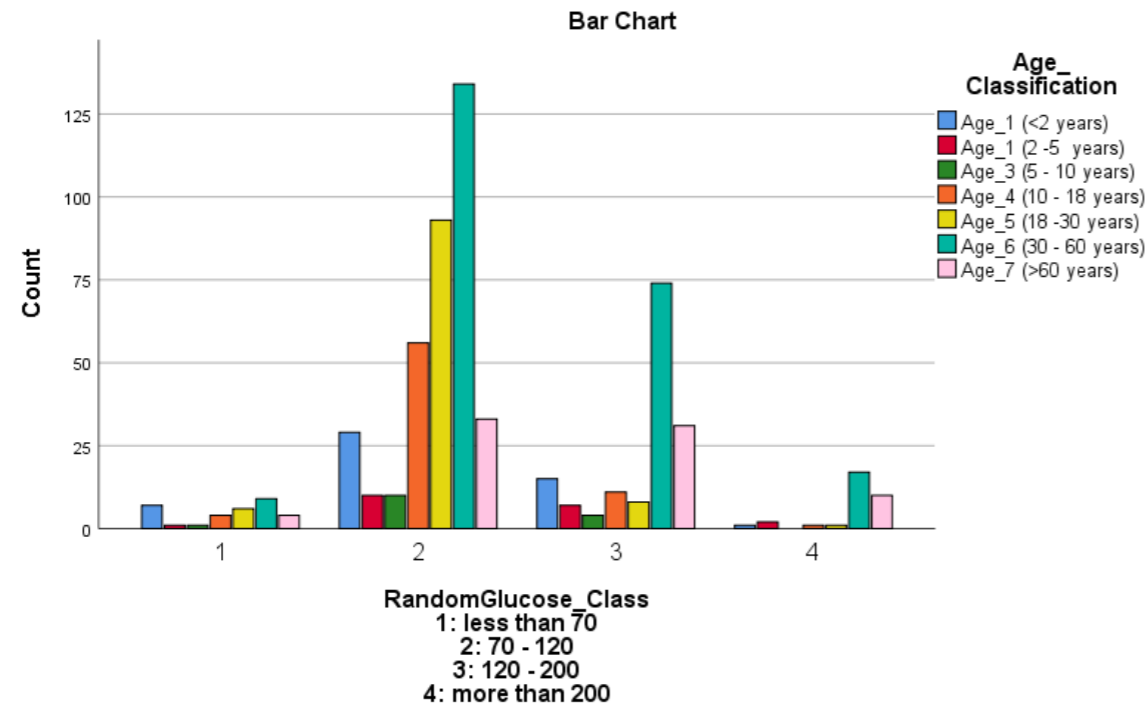

**serum potassium Classification**

**1: less than 3.5**

**2: 3.5 - 5**

**3: more than 5 \* Age\_ Classification Crosstabulation**

|                                |                  | Age_ Classification                     |                   |                    |                     |                     |                     |                   |       |        |
|--------------------------------|------------------|-----------------------------------------|-------------------|--------------------|---------------------|---------------------|---------------------|-------------------|-------|--------|
|                                |                  | Age_1 (<2 years)                        | Age_1 (2-5 years) | Age_3 (5-10 years) | Age_4 (10-18 years) | Age_5 (18-30 years) | Age_6 (30-60 years) | Age_7 (>60 years) | Total |        |
| serum potassium Classification | 1                | Count                                   | 59                | 34                 | 21                  | 23                  | 37                  | 65                | 31    | 270    |
|                                | 1: less than 3.5 | % within serum potassium Classification | 21.9%             | 12.6%              | 7.8%                | 8.5%                | 13.7%               | 24.1%             | 11.5% | 100.0% |
|                                | 2: 3.5 - 5       | Count                                   | 71                | 25                 | 31                  | 82                  | 86                  | 171               | 50    | 516    |
|                                | 3: more than 5   | % within Age_ Classification            | 43.4%             | 55.7%              | 40.4%               | 21.9%               | 29.8%               | 25.8%             | 35.6% | 33.0%  |
|                                |                  | % of Total                              | 7.2%              | 4.2%               | 2.6%                | 2.8%                | 4.5%                | 8.0%              | 3.8%  | 33.0%  |

1  
2  
3  
4  
5  
6  
7  
8  
9  
10  
11  
12  
13  
14  
15  
16  
17  
18  
19  
20  
21  
22  
23  
24  
25  
26  
27  
28  
29  
30  
31  
32  
33  
34  
35  
36  
37  
38  
39  
40  
41  
42  
43  
44  
45  
46  
47  
48  
49  
50  
51  
52  
53  
54  
55  
56  
57  
58  
59  
60

|       |                                         |        |        |        |        |        |        |        |        |  |
|-------|-----------------------------------------|--------|--------|--------|--------|--------|--------|--------|--------|--|
|       | % within serum potassium Classification |        |        |        |        |        |        |        |        |  |
|       | 1: less than 3.5                        | 13.8%  | 4.8%   | 6.0%   | 15.9%  | 16.7%  | 33.1%  | 9.7%   | 100.0% |  |
|       | 2: 3.5 - 5                              |        |        |        |        |        |        |        |        |  |
|       | 3: more than 5                          |        |        |        |        |        |        |        |        |  |
|       | % within Age_ Classification            | 52.2%  | 41.0%  | 59.6%  | 78.1%  | 69.4%  | 67.9%  | 57.5%  | 63.2%  |  |
|       | % of Total                              | 8.7%   | 3.1%   | 3.8%   | 10.0%  | 10.5%  | 20.9%  | 6.1%   | 63.2%  |  |
| 3     | Count                                   | 6      | 2      | 0      | 0      | 1      | 16     | 6      | 31     |  |
|       | % within serum potassium Classification |        |        |        |        |        |        |        |        |  |
|       | 1: less than 3.5                        | 19.4%  | 6.5%   | 0.0%   | 0.0%   | 3.2%   | 51.6%  | 19.4%  | 100.0% |  |
|       | 2: 3.5 - 5                              |        |        |        |        |        |        |        |        |  |
|       | 3: more than 5                          |        |        |        |        |        |        |        |        |  |
|       | % within Age_ Classification            | 4.4%   | 3.3%   | 0.0%   | 0.0%   | 0.8%   | 6.3%   | 6.9%   | 3.8%   |  |
|       | % of Total                              | 0.7%   | 0.2%   | 0.0%   | 0.0%   | 0.1%   | 2.0%   | 0.7%   | 3.8%   |  |
| Total | Count                                   | 136    | 61     | 52     | 105    | 124    | 252    | 87     | 817    |  |
|       | % within serum potassium Classification |        |        |        |        |        |        |        |        |  |
|       | 1: less than 3.5                        | 16.6%  | 7.5%   | 6.4%   | 12.9%  | 15.2%  | 30.8%  | 10.6%  | 100.0% |  |
|       | 2: 3.5 - 5                              |        |        |        |        |        |        |        |        |  |
|       | 3: more than 5                          |        |        |        |        |        |        |        |        |  |
|       | % within Age_ Classification            | 100.0% | 100.0% | 100.0% | 100.0% | 100.0% | 100.0% | 100.0% | 100.0% |  |
|       | % of Total                              | 16.6%  | 7.5%   | 6.4%   | 12.9%  | 15.2%  | 30.8%  | 10.6%  | 100.0% |  |

only



er rev

**SodiumSerum\_Class**

1: less than 135

2: 135 - 145

**3: more than 145 \* Age\_ Classification Crosstabulation**

|                   |                  | Age_ Classification          |                   |                    |                     |                     |                     |                   |       |        |
|-------------------|------------------|------------------------------|-------------------|--------------------|---------------------|---------------------|---------------------|-------------------|-------|--------|
|                   |                  | Age_1 (<2 years)             | Age_1 (2-5 years) | Age_3 (5-10 years) | Age_4 (10-18 years) | Age_5 (18-30 years) | Age_6 (30-60 years) | Age_7 (>60 years) | Total |        |
| SodiumSerum_Class | 1                | Count                        | 76                | 32                 | 22                  | 42                  | 47                  | 98                | 35    | 352    |
|                   | 1: less than 135 | % within SodiumSerum_Class   | 21.6%             | 9.1%               | 6.3%                | 11.9%               | 13.4%               | 27.8%             | 9.9%  | 100.0% |
|                   | 2: 135 - 145     | 1: less than 135             |                   |                    |                     |                     |                     |                   |       |        |
|                   | 3: more than 145 | 2: 135 - 145                 |                   |                    |                     |                     |                     |                   |       |        |
|                   |                  | 3: more than 145             |                   |                    |                     |                     |                     |                   |       |        |
|                   |                  | % within Age_ Classification | 56.3%             | 52.5%              | 43.1%               | 39.6%               | 37.6%               | 39.2%             | 40.7% | 43.2%  |
|                   |                  | % of Total                   | 9.3%              | 3.9%               | 2.7%                | 5.2%                | 5.8%                | 12.0%             | 4.3%  | 43.2%  |
| SodiumSerum_Class | 2                | Count                        | 54                | 27                 | 28                  | 62                  | 75                  | 150               | 50    | 446    |
|                   | 1: less than 135 | % within SodiumSerum_Class   | 12.1%             | 6.1%               | 6.3%                | 13.9%               | 16.8%               | 33.6%             | 11.2% | 100.0% |
|                   | 2: 135 - 145     | 1: less than 135             |                   |                    |                     |                     |                     |                   |       |        |
|                   | 3: more than 145 | 2: 135 - 145                 |                   |                    |                     |                     |                     |                   |       |        |
|                   |                  | 3: more than 145             |                   |                    |                     |                     |                     |                   |       |        |

1  
2  
3  
4  
5  
6  
7  
8  
9  
10  
11  
12  
13  
14  
15  
16  
17  
18  
19  
20  
21  
22  
23  
24  
25  
26  
27  
28  
29  
30  
31  
32  
33  
34  
35  
36  
37  
38  
39  
40  
41  
42  
43  
44  
45  
46  
47  
48  
49  
50  
51  
52  
53  
54  
55  
56  
57  
58  
59  
60

|       |                             |        |        |        |        |        |        |        |        |
|-------|-----------------------------|--------|--------|--------|--------|--------|--------|--------|--------|
|       | % within Age_Classification | 40.0%  | 44.3%  | 54.9%  | 58.5%  | 60.0%  | 60.0%  | 58.1%  | 54.8%  |
|       | % of Total                  | 6.6%   | 3.3%   | 3.4%   | 7.6%   | 9.2%   | 18.4%  | 6.1%   | 54.8%  |
| 3     | Count                       | 5      | 2      | 1      | 2      | 3      | 2      | 1      | 16     |
|       | % within SodiumSerum_Class  | 31.3%  | 12.5%  | 6.3%   | 12.5%  | 18.8%  | 12.5%  | 6.3%   | 100.0% |
|       | 1: less than 135            |        |        |        |        |        |        |        |        |
|       | 2: 135 - 145                |        |        |        |        |        |        |        |        |
|       | 3: more than 145            |        |        |        |        |        |        |        |        |
|       | % within Age_Classification | 3.7%   | 3.3%   | 2.0%   | 1.9%   | 2.4%   | 0.8%   | 1.2%   | 2.0%   |
|       | % of Total                  | 0.6%   | 0.2%   | 0.1%   | 0.2%   | 0.4%   | 0.2%   | 0.1%   | 2.0%   |
| Total | Count                       | 135    | 61     | 51     | 106    | 125    | 250    | 86     | 814    |
|       | % within SodiumSerum_Class  | 16.6%  | 7.5%   | 6.3%   | 13.0%  | 15.4%  | 30.7%  | 10.6%  | 100.0% |
|       | 1: less than 135            |        |        |        |        |        |        |        |        |
|       | 2: 135 - 145                |        |        |        |        |        |        |        |        |
|       | % within Age_Classification | 100.0% | 100.0% | 100.0% | 100.0% | 100.0% | 100.0% | 100.0% | 100.0% |
|       | % of Total                  | 16.6%  | 7.5%   | 6.3%   | 13.0%  | 15.4%  | 30.7%  | 10.6%  | 100.0% |

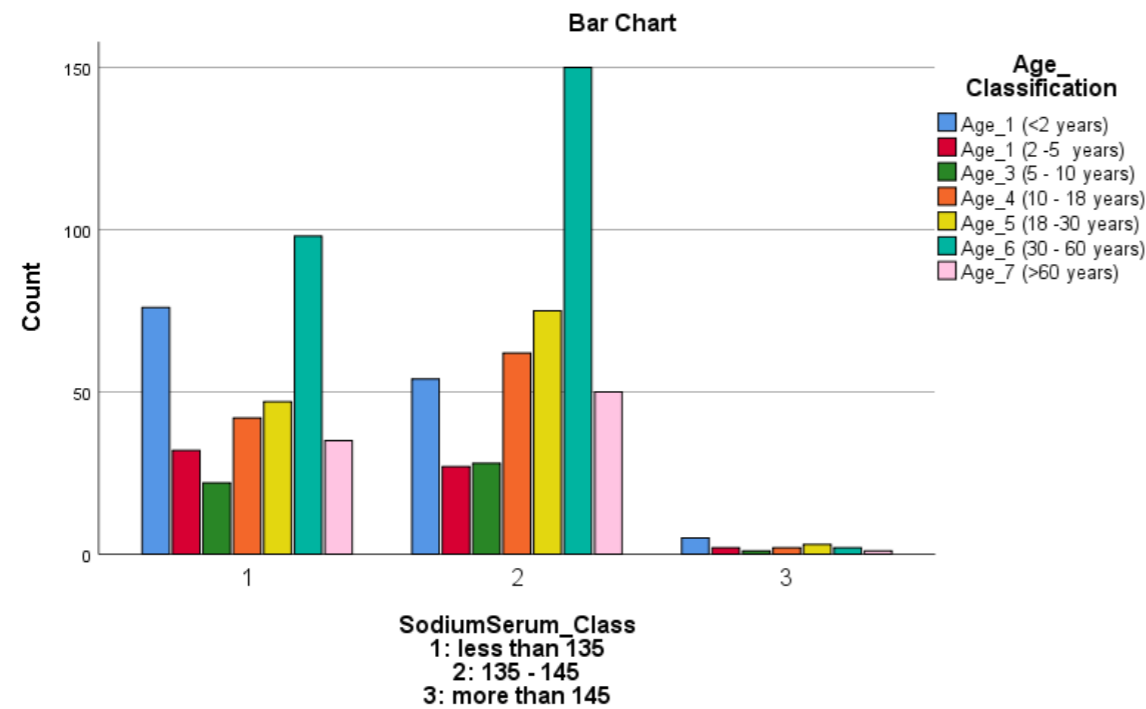

# Complications according to age Class

## any complication through staying at hospital

Yes (1)

### No (0) \* Age\_ Classification Crosstabulation

|                                                                   |            | Age_ Classification                                   |                    |                      |                       |                      |                       |                   |        |        |
|-------------------------------------------------------------------|------------|-------------------------------------------------------|--------------------|----------------------|-----------------------|----------------------|-----------------------|-------------------|--------|--------|
|                                                                   |            | Age_1 (<2 years)                                      | Age_1 (2 -5 years) | Age_3 (5 - 10 years) | Age_4 (10 - 18 years) | Age_5 (18 -30 years) | Age_6 (30 - 60 years) | Age_7 (>60 years) | Total  |        |
| any complication through staying at hospital<br>Yes (1)<br>No (0) | 0          | Count                                                 | 111                | 51                   | 57                    | 93                   | 94                    | 163               | 40     | 609    |
|                                                                   |            | % within any complication through staying at hospital | 18.2%              | 8.4%                 | 9.4%                  | 15.3%                | 15.4%                 | 26.8%             | 6.6%   | 100.0% |
|                                                                   |            | Yes (1)                                               |                    |                      |                       |                      |                       |                   |        |        |
|                                                                   |            | No (0)                                                |                    |                      |                       |                      |                       |                   |        |        |
|                                                                   |            | % within Age_ Classification                          | 53.9%              | 51.5%                | 66.3%                 | 66.4%                | 64.4%                 | 56.4%             | 42.1%  | 57.4%  |
|                                                                   |            | % of Total                                            | 10.5%              | 4.8%                 | 5.4%                  | 8.8%                 | 8.9%                  | 15.4%             | 3.8%   | 57.4%  |
| 1                                                                 |            | Count                                                 | 95                 | 48                   | 29                    | 47                   | 52                    | 126               | 55     | 452    |
|                                                                   |            | % within any complication through staying at hospital | 21.0%              | 10.6%                | 6.4%                  | 10.4%                | 11.5%                 | 27.9%             | 12.2%  | 100.0% |
|                                                                   |            | Yes (1)                                               |                    |                      |                       |                      |                       |                   |        |        |
|                                                                   |            | No (0)                                                |                    |                      |                       |                      |                       |                   |        |        |
|                                                                   |            | % within Age_ Classification                          | 46.1%              | 48.5%                | 33.7%                 | 33.6%                | 35.6%                 | 43.6%             | 57.9%  | 42.6%  |
|                                                                   |            | % of Total                                            | 9.0%               | 4.5%                 | 2.7%                  | 4.4%                 | 4.9%                  | 11.9%             | 5.2%   | 42.6%  |
| Total                                                             |            | Count                                                 | 206                | 99                   | 86                    | 140                  | 146                   | 289               | 95     | 1061   |
|                                                                   |            | % within any complication through staying at hospital | 19.4%              | 9.3%                 | 8.1%                  | 13.2%                | 13.8%                 | 27.2%             | 9.0%   | 100.0% |
|                                                                   |            | Yes (1)                                               |                    |                      |                       |                      |                       |                   |        |        |
|                                                                   |            | No (0)                                                |                    |                      |                       |                      |                       |                   |        |        |
|                                                                   |            | % within Age_ Classification                          | 100.0%             | 100.0%               | 100.0%                | 100.0%               | 100.0%                | 100.0%            | 100.0% | 100.0% |
|                                                                   | % of Total | 19.4%                                                 | 9.3%               | 8.1%                 | 13.2%                 | 13.8%                | 27.2%                 | 9.0%              | 100.0% |        |

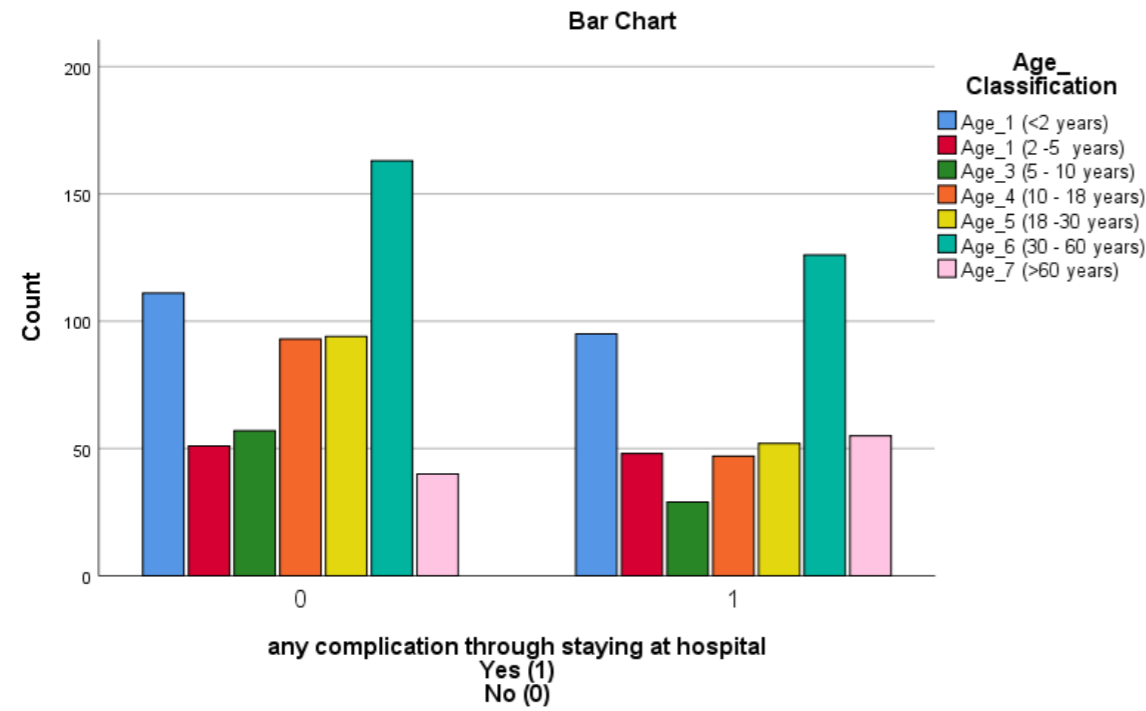

**Sever Dehydration \* Age\_ Classification Crosstabulation**

|                   |                            | Age_ Classification          |                    |                      |                       |                      |                       |                   |        |        |
|-------------------|----------------------------|------------------------------|--------------------|----------------------|-----------------------|----------------------|-----------------------|-------------------|--------|--------|
|                   |                            | Age_1 (<2 years)             | Age_1 (2 -5 years) | Age_3 (5 - 10 years) | Age_4 (10 - 18 years) | Age_5 (18 -30 years) | Age_6 (30 - 60 years) | Age_7 (>60 years) | Total  |        |
| Sever Dehydration | 0                          | Count                        | 164                | 73                   | 75                    | 124                  | 135                   | 245               | 69     | 885    |
|                   |                            | % within Sever Dehydration   | 18.5%              | 8.2%                 | 8.5%                  | 14.0%                | 15.3%                 | 27.7%             | 7.8%   | 100.0% |
|                   |                            | % within Age_ Classification | 79.6%              | 73.7%                | 87.2%                 | 88.6%                | 92.5%                 | 84.8%             | 72.6%  | 83.4%  |
|                   |                            | % of Total                   | 15.5%              | 6.9%                 | 7.1%                  | 11.7%                | 12.7%                 | 23.1%             | 6.5%   | 83.4%  |
|                   | 1                          | Count                        | 41                 | 26                   | 11                    | 15                   | 11                    | 43                | 26     | 173    |
|                   |                            | % within Sever Dehydration   | 23.7%              | 15.0%                | 6.4%                  | 8.7%                 | 6.4%                  | 24.9%             | 15.0%  | 100.0% |
|                   |                            | % within Age_ Classification | 19.9%              | 26.3%                | 12.8%                 | 10.7%                | 7.5%                  | 14.9%             | 27.4%  | 16.3%  |
|                   |                            | % of Total                   | 3.9%               | 2.5%                 | 1.0%                  | 1.4%                 | 1.0%                  | 4.1%              | 2.5%   | 16.3%  |
|                   | 4                          | Count                        | 1                  | 0                    | 0                     | 1                    | 0                     | 1                 | 0      | 3      |
|                   |                            | % within Sever Dehydration   | 33.3%              | 0.0%                 | 0.0%                  | 33.3%                | 0.0%                  | 33.3%             | 0.0%   | 100.0% |
|                   |                            | % within Age_ Classification | 0.5%               | 0.0%                 | 0.0%                  | 0.7%                 | 0.0%                  | 0.3%              | 0.0%   | 0.3%   |
|                   |                            | % of Total                   | 0.1%               | 0.0%                 | 0.0%                  | 0.1%                 | 0.0%                  | 0.1%              | 0.0%   | 0.3%   |
| Total             | Count                      | 206                          | 99                 | 86                   | 140                   | 146                  | 289                   | 95                | 1061   |        |
|                   | % within Sever Dehydration | 19.4%                        | 9.3%               | 8.1%                 | 13.2%                 | 13.8%                | 27.2%                 | 9.0%              | 100.0% |        |

|                              |        |        |        |        |        |        |        |        |
|------------------------------|--------|--------|--------|--------|--------|--------|--------|--------|
| % within Age_ Classification | 100.0% | 100.0% | 100.0% | 100.0% | 100.0% | 100.0% | 100.0% | 100.0% |
| % of Total                   | 19.4%  | 9.3%   | 8.1%   | 13.2%  | 13.8%  | 27.2%  | 9.0%   | 100.0% |

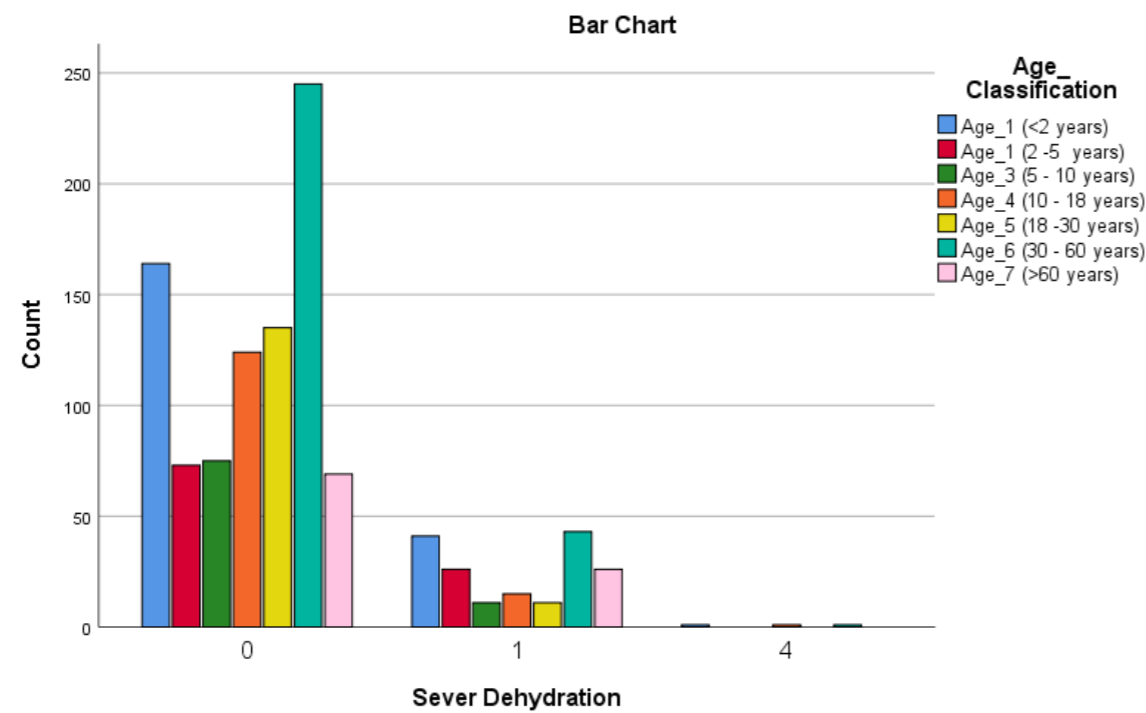

review

**Electrolyte Imbalance \* Age\_ Classification Crosstabulation**

|                       |                                | Age_ Classification            |                   |                    |                     |                     |                     |                   | Total  |        |
|-----------------------|--------------------------------|--------------------------------|-------------------|--------------------|---------------------|---------------------|---------------------|-------------------|--------|--------|
|                       |                                | Age_1 (<2 years)               | Age_1 (2-5 years) | Age_3 (5-10 years) | Age_4 (10-18 years) | Age_5 (18-30 years) | Age_6 (30-60 years) | Age_7 (>60 years) |        |        |
| Electrolyte Imbalance | 0                              | Count                          | 141               | 64                 | 62                  | 110                 | 107                 | 217               | 61     | 762    |
|                       |                                | % within Electrolyte Imbalance | 18.5%             | 8.4%               | 8.1%                | 14.4%               | 14.0%               | 28.5%             | 8.0%   | 100.0% |
|                       |                                | % within Age_ Classification   | 68.4%             | 64.6%              | 72.1%               | 78.6%               | 73.3%               | 75.1%             | 64.2%  | 71.8%  |
|                       |                                | % of Total                     | 13.3%             | 6.0%               | 5.8%                | 10.4%               | 10.1%               | 20.5%             | 5.7%   | 71.8%  |
| Electrolyte Imbalance | 1                              | Count                          | 65                | 35                 | 24                  | 30                  | 39                  | 72                | 34     | 299    |
|                       |                                | % within Electrolyte Imbalance | 21.7%             | 11.7%              | 8.0%                | 10.0%               | 13.0%               | 24.1%             | 11.4%  | 100.0% |
|                       |                                | % within Age_ Classification   | 31.6%             | 35.4%              | 27.9%               | 21.4%               | 26.7%               | 24.9%             | 35.8%  | 28.2%  |
|                       |                                | % of Total                     | 6.1%              | 3.3%               | 2.3%                | 2.8%                | 3.7%                | 6.8%              | 3.2%   | 28.2%  |
| Total                 | Count                          | 206                            | 99                | 86                 | 140                 | 146                 | 289                 | 95                | 1061   |        |
|                       | % within Electrolyte Imbalance | 19.4%                          | 9.3%              | 8.1%               | 13.2%               | 13.8%               | 27.2%               | 9.0%              | 100.0% |        |
|                       | % within Age_ Classification   | 100.0%                         | 100.0%            | 100.0%             | 100.0%              | 100.0%              | 100.0%              | 100.0%            | 100.0% |        |

|            |       |      |      |       |       |       |      |        |
|------------|-------|------|------|-------|-------|-------|------|--------|
| % of Total | 19.4% | 9.3% | 8.1% | 13.2% | 13.8% | 27.2% | 9.0% | 100.0% |
|------------|-------|------|------|-------|-------|-------|------|--------|



review

**Acute Kidney Injury \* Age\_ Classification Crosstabulation**

|                     |                              | Age_ Classification          |                   |                    |                     |                     |                     |                   | Total  |        |
|---------------------|------------------------------|------------------------------|-------------------|--------------------|---------------------|---------------------|---------------------|-------------------|--------|--------|
|                     |                              | Age_1 (<2 years)             | Age_1 (2-5 years) | Age_3 (5-10 years) | Age_4 (10-18 years) | Age_5 (18-30 years) | Age_6 (30-60 years) | Age_7 (>60 years) |        |        |
| Acute Kidney Injury | 0                            | Count                        | 199               | 95                 | 79                  | 134                 | 141                 | 251               | 57     | 956    |
|                     |                              | % within Acute Kidney Injury | 20.8%             | 9.9%               | 8.3%                | 14.0%               | 14.7%               | 26.3%             | 6.0%   | 100.0% |
|                     |                              | % within Age_ Classification | 96.6%             | 96.0%              | 91.9%               | 95.7%               | 96.6%               | 86.9%             | 60.0%  | 90.1%  |
|                     |                              | % of Total                   | 18.8%             | 9.0%               | 7.4%                | 12.6%               | 13.3%               | 23.7%             | 5.4%   | 90.1%  |
|                     | 1                            | Count                        | 7                 | 4                  | 7                   | 6                   | 5                   | 38                | 38     | 105    |
|                     |                              | % within Acute Kidney Injury | 6.7%              | 3.8%               | 6.7%                | 5.7%                | 4.8%                | 36.2%             | 36.2%  | 100.0% |
|                     |                              | % within Age_ Classification | 3.4%              | 4.0%               | 8.1%                | 4.3%                | 3.4%                | 13.1%             | 40.0%  | 9.9%   |
|                     |                              | % of Total                   | 0.7%              | 0.4%               | 0.7%                | 0.6%                | 0.5%                | 3.6%              | 3.6%   | 9.9%   |
| Total               | Count                        | 206                          | 99                | 86                 | 140                 | 146                 | 289                 | 95                | 1061   |        |
|                     | % within Acute Kidney Injury | 19.4%                        | 9.3%              | 8.1%               | 13.2%               | 13.8%               | 27.2%               | 9.0%              | 100.0% |        |
|                     | % within Age_ Classification | 100.0%                       | 100.0%            | 100.0%             | 100.0%              | 100.0%              | 100.0%              | 100.0%            | 100.0% |        |
|                     | % of Total                   | 19.4%                        | 9.3%              | 8.1%               | 13.2%               | 13.8%               | 27.2%               | 9.0%              | 100.0% |        |



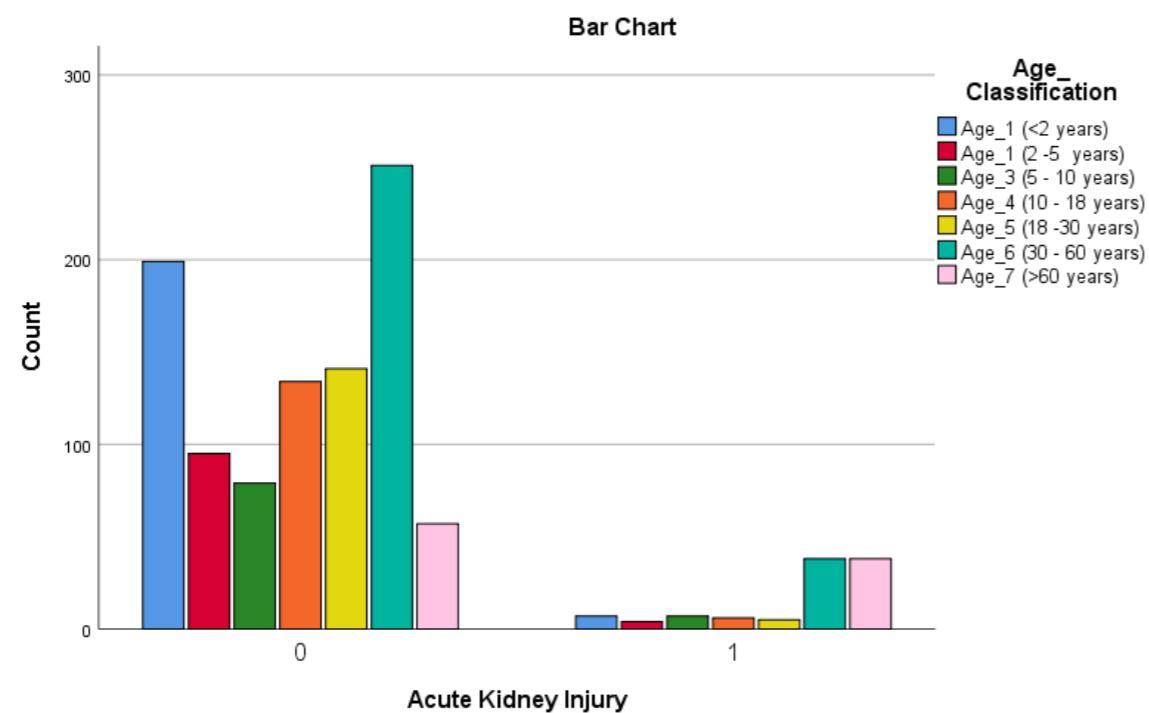

**Shock \* Age\_ Classification Crosstabulation**

|       |   | Age_ Classification          |                    |                      |                       |                      |                       |                   |        |        |
|-------|---|------------------------------|--------------------|----------------------|-----------------------|----------------------|-----------------------|-------------------|--------|--------|
|       |   | Age_1 (<2 years)             | Age_1 (2 -5 years) | Age_3 (5 - 10 years) | Age_4 (10 - 18 years) | Age_5 (18 -30 years) | Age_6 (30 - 60 years) | Age_7 (>60 years) | Total  |        |
| Shock | 0 | Count                        | 200                | 95                   | 85                    | 139                  | 144                   | 283               | 94     | 1040   |
|       |   | % within Shock               | 19.2%              | 9.1%                 | 8.2%                  | 13.4%                | 13.8%                 | 27.2%             | 9.0%   | 100.0% |
|       |   | % within Age_ Classification | 97.1%              | 96.0%                | 98.8%                 | 99.3%                | 98.6%                 | 97.9%             | 98.9%  | 98.0%  |
|       |   | % of Total                   | 18.9%              | 9.0%                 | 8.0%                  | 13.1%                | 13.6%                 | 26.7%             | 8.9%   | 98.0%  |
| Shock | 1 | Count                        | 6                  | 4                    | 1                     | 1                    | 2                     | 6                 | 1      | 21     |
|       |   | % within Shock               | 28.6%              | 19.0%                | 4.8%                  | 4.8%                 | 9.5%                  | 28.6%             | 4.8%   | 100.0% |
|       |   | % within Age_ Classification | 2.9%               | 4.0%                 | 1.2%                  | 0.7%                 | 1.4%                  | 2.1%              | 1.1%   | 2.0%   |
|       |   | % of Total                   | 0.6%               | 0.4%                 | 0.1%                  | 0.1%                 | 0.2%                  | 0.6%              | 0.1%   | 2.0%   |
| Total |   | Count                        | 206                | 99                   | 86                    | 140                  | 146                   | 289               | 95     | 1061   |
|       |   | % within Shock               | 19.4%              | 9.3%                 | 8.1%                  | 13.2%                | 13.8%                 | 27.2%             | 9.0%   | 100.0% |
|       |   | % within Age_ Classification | 100.0%             | 100.0%               | 100.0%                | 100.0%               | 100.0%                | 100.0%            | 100.0% | 100.0% |
|       |   | % of Total                   | 19.4%              | 9.3%                 | 8.1%                  | 13.2%                | 13.8%                 | 27.2%             | 9.0%   | 100.0% |

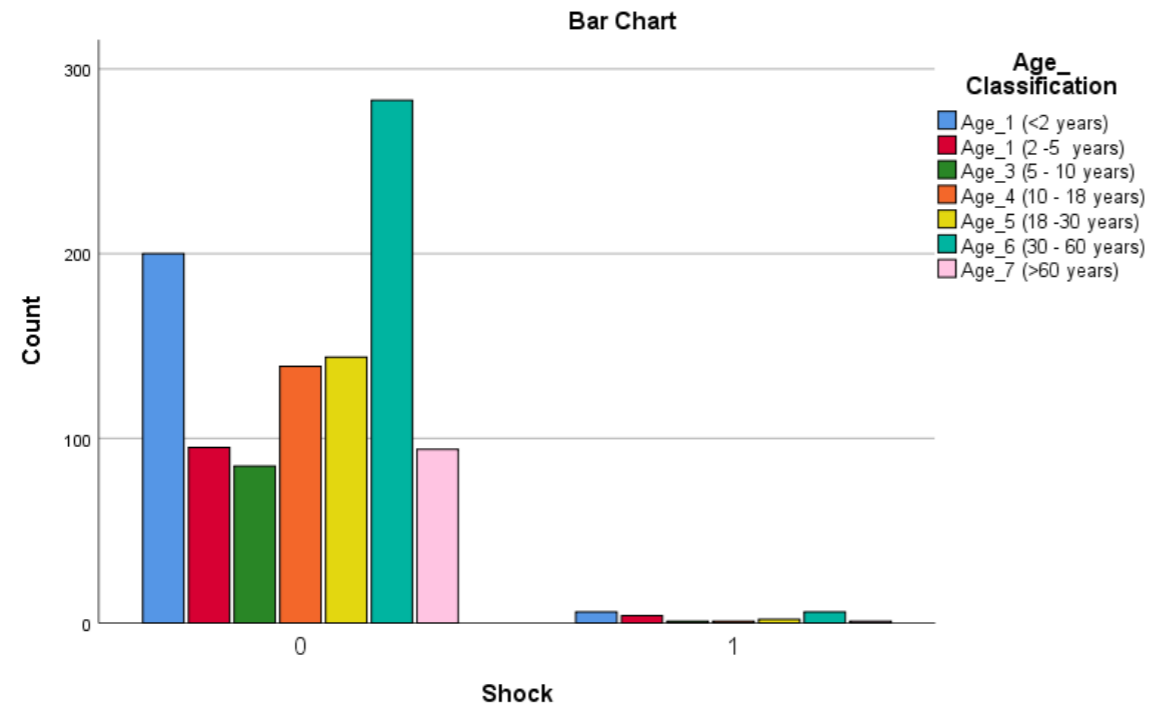

Hypoglycemia \* Age\_ Classification Crosstabulation

|              |                              | Age_ Classification          |                   |                    |                     |                     |                     |                   |        |        |
|--------------|------------------------------|------------------------------|-------------------|--------------------|---------------------|---------------------|---------------------|-------------------|--------|--------|
|              |                              | Age_1 (<2 years)             | Age_1 (2-5 years) | Age_3 (5-10 years) | Age_4 (10-18 years) | Age_5 (18-30 years) | Age_6 (30-60 years) | Age_7 (>60 years) | Total  |        |
| Hypoglycemia | 0                            | Count                        | 199               | 98                 | 85                  | 136                 | 140                 | 280               | 91     | 1029   |
|              |                              | % within Hypoglycemia        | 19.3%             | 9.5%               | 8.3%                | 13.2%               | 13.6%               | 27.2%             | 8.8%   | 100.0% |
|              |                              | % within Age_ Classification | 96.6%             | 99.0%              | 98.8%               | 97.1%               | 95.9%               | 96.9%             | 95.8%  | 97.0%  |
|              |                              | % of Total                   | 18.8%             | 9.2%               | 8.0%                | 12.8%               | 13.2%               | 26.4%             | 8.6%   | 97.0%  |
|              | 1                            | Count                        | 7                 | 1                  | 1                   | 4                   | 6                   | 9                 | 4      | 32     |
|              |                              | % within Hypoglycemia        | 21.9%             | 3.1%               | 3.1%                | 12.5%               | 18.8%               | 28.1%             | 12.5%  | 100.0% |
|              |                              | % within Age_ Classification | 3.4%              | 1.0%               | 1.2%                | 2.9%                | 4.1%                | 3.1%              | 4.2%   | 3.0%   |
|              |                              | % of Total                   | 0.7%              | 0.1%               | 0.1%                | 0.4%                | 0.6%                | 0.8%              | 0.4%   | 3.0%   |
| Total        | Count                        | 206                          | 99                | 86                 | 140                 | 146                 | 289                 | 95                | 1061   |        |
|              | % within Hypoglycemia        | 19.4%                        | 9.3%              | 8.1%               | 13.2%               | 13.8%               | 27.2%               | 9.0%              | 100.0% |        |
|              | % within Age_ Classification | 100.0%                       | 100.0%            | 100.0%             | 100.0%              | 100.0%              | 100.0%              | 100.0%            | 100.0% |        |
|              | % of Total                   | 19.4%                        | 9.3%              | 8.1%               | 13.2%               | 13.8%               | 27.2%               | 9.0%              | 100.0% |        |

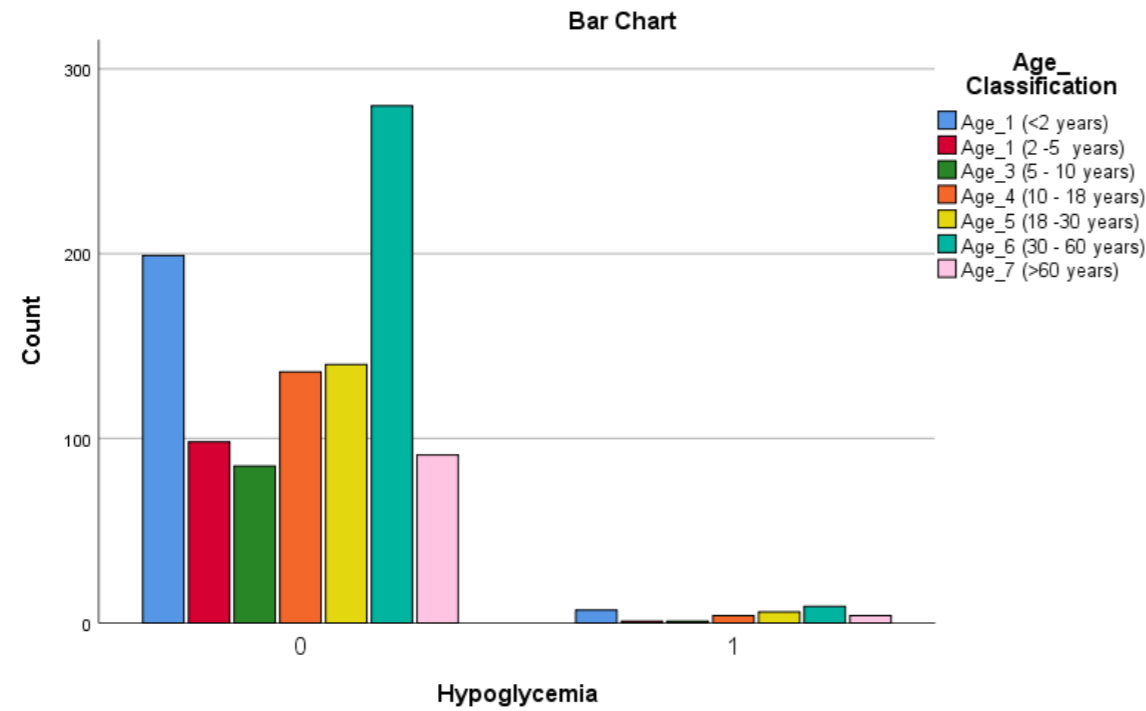

Other \* Age\_ Classification Crosstabulation

|       |   | Age_ Classification          |                   |                    |                     |                     |                     |                   |        |        |
|-------|---|------------------------------|-------------------|--------------------|---------------------|---------------------|---------------------|-------------------|--------|--------|
|       |   | Age_1 (<2 years)             | Age_1 (2-5 years) | Age_3 (5-10 years) | Age_4 (10-18 years) | Age_5 (18-30 years) | Age_6 (30-60 years) | Age_7 (>60 years) | Total  |        |
| Other | 0 | Count                        | 199               | 96                 | 86                  | 139                 | 145                 | 284               | 93     | 1042   |
|       |   | % within Other               | 19.1%             | 9.2%               | 8.3%                | 13.3%               | 13.9%               | 27.3%             | 8.9%   | 100.0% |
|       |   | % within Age_ Classification | 96.6%             | 97.0%              | 100.0%              | 99.3%               | 99.3%               | 98.3%             | 97.9%  | 98.2%  |
|       |   | % of Total                   | 18.8%             | 9.0%               | 8.1%                | 13.1%               | 13.7%               | 26.8%             | 8.8%   | 98.2%  |
| Other | 1 | Count                        | 7                 | 3                  | 0                   | 1                   | 1                   | 5                 | 2      | 19     |
|       |   | % within Other               | 36.8%             | 15.8%              | 0.0%                | 5.3%                | 5.3%                | 26.3%             | 10.5%  | 100.0% |
|       |   | % within Age_ Classification | 3.4%              | 3.0%               | 0.0%                | 0.7%                | 0.7%                | 1.7%              | 2.1%   | 1.8%   |
|       |   | % of Total                   | 0.7%              | 0.3%               | 0.0%                | 0.1%                | 0.1%                | 0.5%              | 0.2%   | 1.8%   |
| Total |   | Count                        | 206               | 99                 | 86                  | 140                 | 146                 | 289               | 95     | 1061   |
|       |   | % within Other               | 19.4%             | 9.3%               | 8.1%                | 13.2%               | 13.8%               | 27.2%             | 9.0%   | 100.0% |
|       |   | % within Age_ Classification | 100.0%            | 100.0%             | 100.0%              | 100.0%              | 100.0%              | 100.0%            | 100.0% | 100.0% |
|       |   | % of Total                   | 19.4%             | 9.3%               | 8.1%                | 13.2%               | 13.8%               | 27.2%             | 9.0%   | 100.0% |

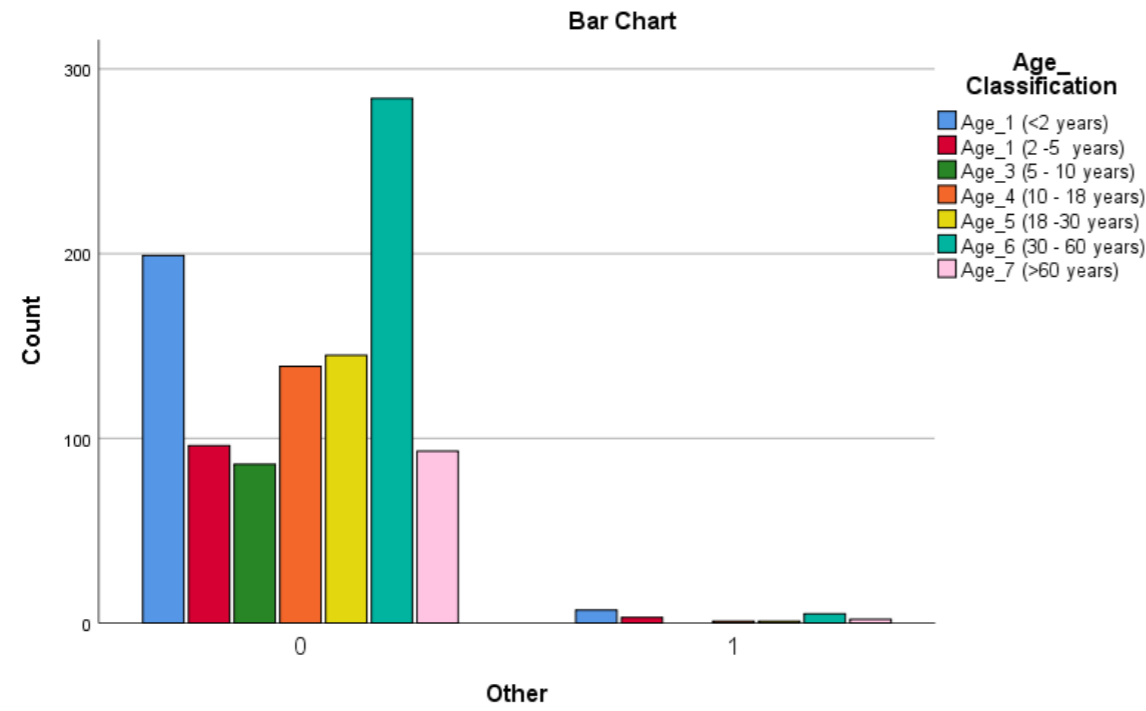

Patient Health at discharge \* Age\_ Classification Crosstabulation

|                             |      | Age_ Classification                  |                   |                    |                     |                     |                     |                   | Total |        |
|-----------------------------|------|--------------------------------------|-------------------|--------------------|---------------------|---------------------|---------------------|-------------------|-------|--------|
|                             |      | Age_1 (<2 years)                     | Age_1 (2-5 years) | Age_3 (5-10 years) | Age_4 (10-18 years) | Age_5 (18-30 years) | Age_6 (30-60 years) | Age_7 (>60 years) |       |        |
| Patient Health at discharge | Bad  | Count                                | 4                 | 0                  | 1                   | 2                   | 2                   | 8                 | 7     | 24     |
|                             |      | % within Patient Health at discharge | 16.7%             | 0.0%               | 4.2%                | 8.3%                | 8.3%                | 33.3%             | 29.2% | 100.0% |
|                             |      | % within Age_ Classification         | 1.9%              | 0.0%               | 1.2%                | 1.4%                | 1.4%                | 2.8%              | 7.4%  | 2.3%   |
|                             |      | % of Total                           | 0.4%              | 0.0%               | 0.1%                | 0.2%                | 0.2%                | 0.8%              | 0.7%  | 2.3%   |
|                             | Die  | Count                                | 1                 | 2                  | 0                   | 0                   | 0                   | 0                 | 1     | 4      |
|                             |      | % within Patient Health at discharge | 25.0%             | 50.0%              | 0.0%                | 0.0%                | 0.0%                | 0.0%              | 25.0% | 100.0% |
|                             |      | % within Age_ Classification         | 0.5%              | 2.0%               | 0.0%                | 0.0%                | 0.0%                | 0.0%              | 1.1%  | 0.4%   |
|                             |      | % of Total                           | 0.1%              | 0.2%               | 0.0%                | 0.0%                | 0.0%                | 0.0%              | 0.1%  | 0.4%   |
|                             | Good | Count                                | 181               | 88                 | 77                  | 115                 | 110                 | 210               | 65    | 846    |
|                             |      | % within Patient Health at discharge | 21.4%             | 10.4%              | 9.1%                | 13.6%               | 13.0%               | 24.8%             | 7.7%  | 100.0% |
|                             |      | % within Age_ Classification         | 87.9%             | 88.9%              | 89.5%               | 82.1%               | 75.3%               | 72.7%             | 68.4% | 79.7%  |
|                             |      | % of Total                           | 17.1%             | 8.3%               | 7.3%                | 10.8%               | 10.4%               | 19.8%             | 6.1%  | 79.7%  |

|       |          |                                      |        |        |        |        |        |        |        |        |
|-------|----------|--------------------------------------|--------|--------|--------|--------|--------|--------|--------|--------|
|       | Moderate | Count                                | 20     | 9      | 8      | 23     | 34     | 71     | 22     | 187    |
|       |          | % within Patient Health at discharge | 10.7%  | 4.8%   | 4.3%   | 12.3%  | 18.2%  | 38.0%  | 11.8%  | 100.0% |
|       |          | % within Age_ Classification         | 9.7%   | 9.1%   | 9.3%   | 16.4%  | 23.3%  | 24.6%  | 23.2%  | 17.6%  |
|       |          | % of Total                           | 1.9%   | 0.8%   | 0.8%   | 2.2%   | 3.2%   | 6.7%   | 2.1%   | 17.6%  |
| Total |          | Count                                | 206    | 99     | 86     | 140    | 146    | 289    | 95     | 1061   |
|       |          | % within Patient Health at discharge | 19.4%  | 9.3%   | 8.1%   | 13.2%  | 13.8%  | 27.2%  | 9.0%   | 100.0% |
|       |          | % within Age_ Classification         | 100.0% | 100.0% | 100.0% | 100.0% | 100.0% | 100.0% | 100.0% | 100.0% |
|       |          | % of Total                           | 19.4%  | 9.3%   | 8.1%   | 13.2%  | 13.8%  | 27.2%  | 9.0%   | 100.0% |

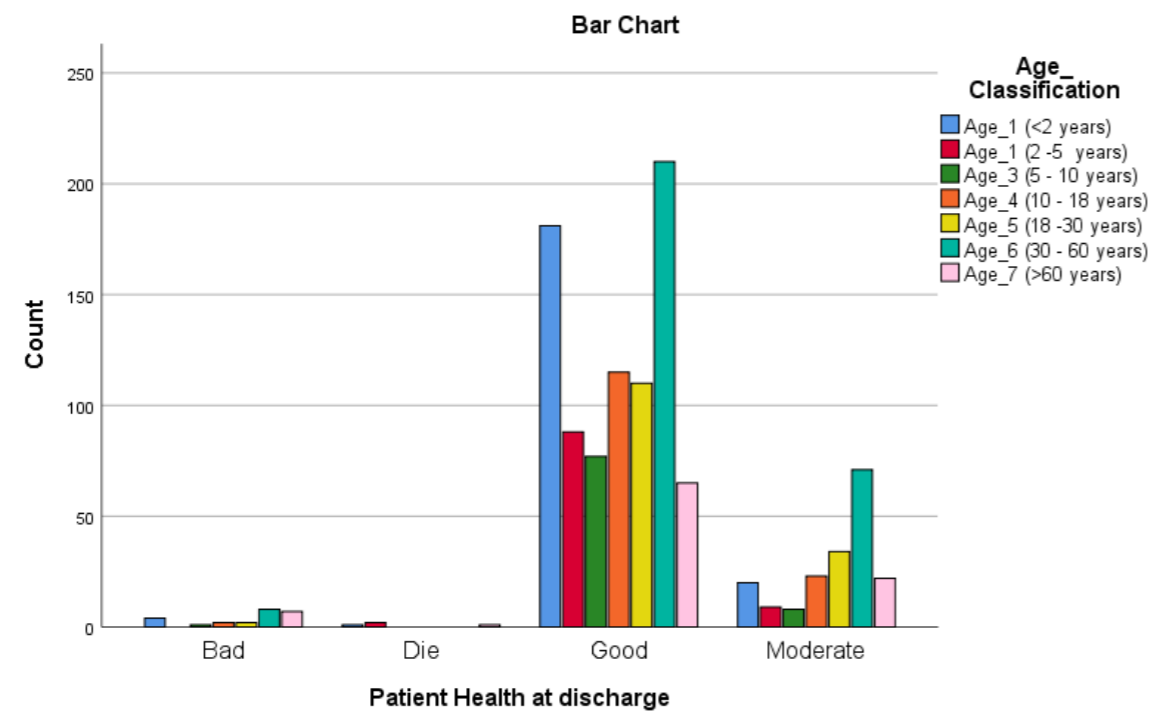

review only

**Patient Health after two weeks - one month from the admission \* Age\_ Classification Crosstabulation**

|                                                         |                                                            | Age_ Classification |                    |                      |                       |                      |                       | Total             |        |
|---------------------------------------------------------|------------------------------------------------------------|---------------------|--------------------|----------------------|-----------------------|----------------------|-----------------------|-------------------|--------|
|                                                         |                                                            | Age_1 (<2 years)    | Age_1 (2 -5 years) | Age_3 (5 - 10 years) | Age_4 (10 - 18 years) | Age_5 (18 -30 years) | Age_6 (30 - 60 years) | Age_7 (>60 years) | Total  |
| Patient Health after after two weeks from the admission | Count                                                      | 0                   | 2                  | 0                    | 0                     | 0                    | 0                     | 0                 | 2      |
|                                                         | % within Patient Health after two weeks from the admission | 0.0%                | 100.0%             | 0.0%                 | 0.0%                  | 0.0%                 | 0.0%                  | 0.0%              | 100.0% |

|  |          |                                                            |        |        |        |        |        |        |        |        |
|--|----------|------------------------------------------------------------|--------|--------|--------|--------|--------|--------|--------|--------|
|  |          | % within Age_ Classification                               | 0.0%   | 2.0%   | 0.0%   | 0.0%   | 0.0%   | 0.0%   | 0.0%   | 0.2%   |
|  |          | % of Total                                                 | 0.0%   | 0.2%   | 0.0%   | 0.0%   | 0.0%   | 0.0%   | 0.0%   | 0.2%   |
|  | Bad      | Count                                                      | 5      | 1      | 2      | 3      | 0      | 17     | 8      | 36     |
|  |          | % within Patient Health after two weeks from the admission | 13.9%  | 2.8%   | 5.6%   | 8.3%   | 0.0%   | 47.2%  | 22.2%  | 100.0% |
|  |          | % within Age_ Classification                               | 2.4%   | 1.0%   | 2.3%   | 2.1%   | 0.0%   | 5.9%   | 8.4%   | 3.4%   |
|  |          | % of Total                                                 | 0.5%   | 0.1%   | 0.2%   | 0.3%   | 0.0%   | 1.6%   | 0.8%   | 3.4%   |
|  | Die      | Count                                                      | 3      | 2      | 0      | 0      | 0      | 1      | 4      | 10     |
|  |          | % within Patient Health after two weeks from the admission | 30.0%  | 20.0%  | 0.0%   | 0.0%   | 0.0%   | 10.0%  | 40.0%  | 100.0% |
|  |          | % within Age_ Classification                               | 1.5%   | 2.0%   | 0.0%   | 0.0%   | 0.0%   | 0.3%   | 4.2%   | 0.9%   |
|  |          | % of Total                                                 | 0.3%   | 0.2%   | 0.0%   | 0.0%   | 0.0%   | 0.1%   | 0.4%   | 0.9%   |
|  | Good     | Count                                                      | 169    | 88     | 74     | 112    | 119    | 230    | 66     | 858    |
|  |          | % within Patient Health after two weeks from the admission | 19.7%  | 10.3%  | 8.6%   | 13.1%  | 13.9%  | 26.8%  | 7.7%   | 100.0% |
|  |          | % within Age_ Classification                               | 82.0%  | 88.9%  | 86.0%  | 80.0%  | 81.5%  | 79.6%  | 69.5%  | 80.9%  |
|  |          | % of Total                                                 | 15.9%  | 8.3%   | 7.0%   | 10.6%  | 11.2%  | 21.7%  | 6.2%   | 80.9%  |
|  | Moderate | Count                                                      | 29     | 6      | 10     | 25     | 27     | 41     | 17     | 155    |
|  |          | % within Patient Health after two weeks from the admission | 18.7%  | 3.9%   | 6.5%   | 16.1%  | 17.4%  | 26.5%  | 11.0%  | 100.0% |
|  |          | % within Age_ Classification                               | 14.1%  | 6.1%   | 11.6%  | 17.9%  | 18.5%  | 14.2%  | 17.9%  | 14.6%  |
|  |          | % of Total                                                 | 2.7%   | 0.6%   | 0.9%   | 2.4%   | 2.5%   | 3.9%   | 1.6%   | 14.6%  |
|  | Total    | Count                                                      | 206    | 99     | 86     | 140    | 146    | 289    | 95     | 1061   |
|  |          | % within Patient Health after two weeks from the admission | 19.4%  | 9.3%   | 8.1%   | 13.2%  | 13.8%  | 27.2%  | 9.0%   | 100.0% |
|  |          | % within Age_ Classification                               | 100.0% | 100.0% | 100.0% | 100.0% | 100.0% | 100.0% | 100.0% | 100.0% |
|  |          | % of Total                                                 | 19.4%  | 9.3%   | 8.1%   | 13.2%  | 13.8%  | 27.2%  | 9.0%   | 100.0% |

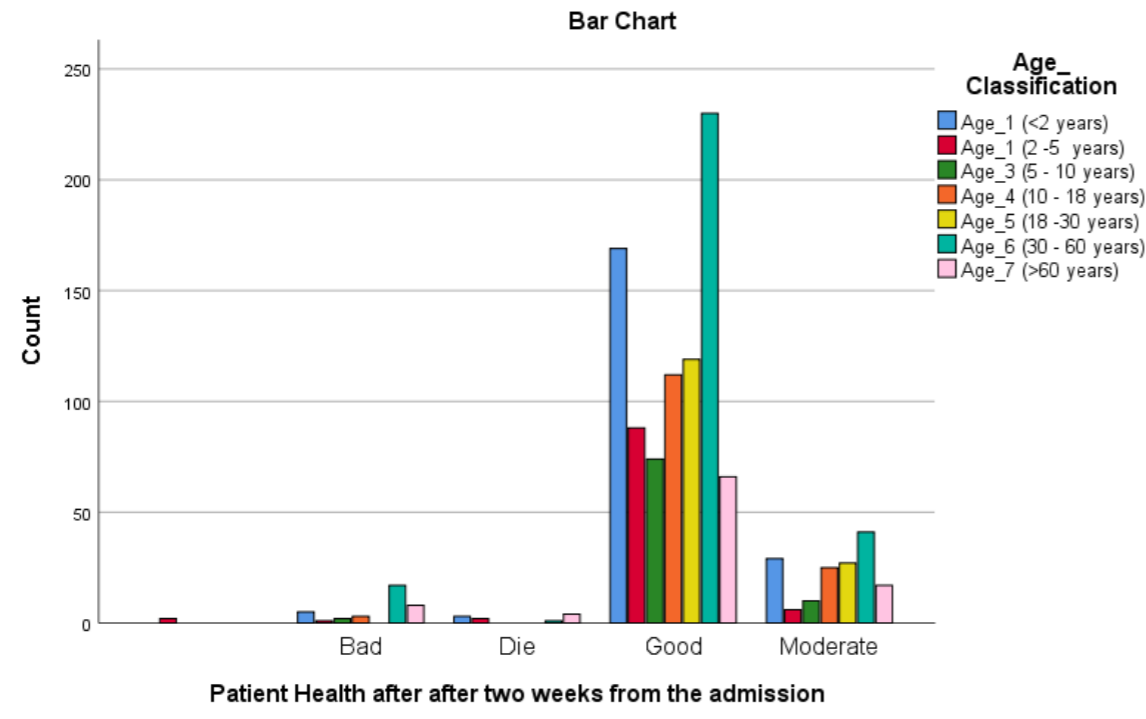

-er review only

1  
2  
3  
4  
5  
6  
7  
8  
9  
10  
11  
12  
13  
14  
15  
16  
17  
18  
19  
20  
21  
22  
23  
24  
25  
26  
27  
28  
29  
30  
31  
32  
33  
34  
35  
36  
37  
38  
39  
40  
41  
42  
43  
44  
45  
46  
47  
48  
49  
50  
51  
52  
53  
54  
55  
56  
57  
58  
59  
60

**STROBE 2007 (v4) Statement—Checklist of items that should be included in reports of *cohort studies***

| Section/Topic                | Item # | Recommendation                                                                                                                                                                       | Reported on page # |
|------------------------------|--------|--------------------------------------------------------------------------------------------------------------------------------------------------------------------------------------|--------------------|
| <b>Title and abstract</b>    | 1      | (a) Indicate the study's design with a commonly used term in the title or the abstract                                                                                               | 1,2                |
|                              |        | (b) Provide in the abstract an informative and balanced summary of what was done and what was found                                                                                  | 1,2                |
| <b>Introduction</b>          |        |                                                                                                                                                                                      | <b>3</b>           |
| Background/rationale         | 2      | Explain the scientific background and rationale for the investigation being reported                                                                                                 | 3                  |
| Objectives                   | 3      | State specific objectives, including any prespecified hypotheses                                                                                                                     | 3                  |
| <b>Methods</b>               |        |                                                                                                                                                                                      | <b>4, 5</b>        |
| Study design                 | 4      | Present key elements of study design early in the paper                                                                                                                              | 4                  |
| Setting                      | 5      | Describe the setting, locations, and relevant dates, including periods of recruitment, exposure, follow-up, and data collection                                                      | 4                  |
| Participants                 | 6      | (a) Give the eligibility criteria, and the sources and methods of selection of participants. Describe methods of follow-up                                                           | 4                  |
|                              |        | (b) For matched studies, give matching criteria and number of exposed and unexposed                                                                                                  | 4                  |
| Variables                    | 7      | Clearly define all outcomes, exposures, predictors, potential confounders, and effect modifiers. Give diagnostic criteria, if applicable                                             | 4, 5               |
| Data sources/<br>measurement | 8*     | For each variable of interest, give sources of data and details of methods of assessment (measurement). Describe comparability of assessment methods if there is more than one group |                    |
| Bias                         | 9      | Describe any efforts to address potential sources of bias                                                                                                                            | 4                  |
| Study size                   | 10     | Explain how the study size was arrived at                                                                                                                                            | 4                  |
| Quantitative variables       | 11     | Explain how quantitative variables were handled in the analyses. If applicable, describe which groupings were chosen and why                                                         |                    |
| Statistical methods          | 12     | (a) Describe all statistical methods, including those used to control for confounding                                                                                                | 5                  |
|                              |        | (b) Describe any methods used to examine subgroups and interactions                                                                                                                  | 5                  |
|                              |        | (c) Explain how missing data were addressed                                                                                                                                          | 5                  |
|                              |        | (d) If applicable, explain how loss to follow-up was addressed                                                                                                                       | 5                  |
|                              |        | (e) Describe any sensitivity analyses                                                                                                                                                | 5                  |
| <b>Results</b>               |        |                                                                                                                                                                                      | <b>5, 6</b>        |



|                          |     |                                                                                                                                                                                                              |      |
|--------------------------|-----|--------------------------------------------------------------------------------------------------------------------------------------------------------------------------------------------------------------|------|
| Participants             | 13* | (a) Report numbers of individuals at each stage of study—eg numbers potentially eligible, examined for eligibility, confirmed eligible, included in the study, completing follow-up, and analysed            | 5    |
|                          |     | (b) Give reasons for non-participation at each stage                                                                                                                                                         | 5    |
|                          |     | (c) Consider use of a flow diagram                                                                                                                                                                           | 5    |
| Descriptive data         | 14* | (a) Give characteristics of study participants (eg demographic, clinical, social) and information on exposures and potential confounders                                                                     | 5    |
|                          |     | (b) Indicate number of participants with missing data for each variable of interest                                                                                                                          |      |
|                          |     | (c) Summarise follow-up time (eg, average and total amount)                                                                                                                                                  |      |
| Outcome data             | 15* | Report numbers of outcome events or summary measures over time                                                                                                                                               | 5, 6 |
| Main results             | 16  | (a) Give unadjusted estimates and, if applicable, confounder-adjusted estimates and their precision (eg, 95% confidence interval). Make clear which confounders were adjusted for and why they were included | 5, 6 |
|                          |     | (b) Report category boundaries when continuous variables were categorized                                                                                                                                    |      |
|                          |     | (c) If relevant, consider translating estimates of relative risk into absolute risk for a meaningful time period                                                                                             |      |
| Other analyses           | 17  | Report other analyses done—eg analyses of subgroups and interactions, and sensitivity analyses                                                                                                               |      |
| <b>Discussion</b>        |     |                                                                                                                                                                                                              | 6    |
| Key results              | 18  | Summarise key results with reference to study objectives                                                                                                                                                     |      |
| <b>Limitations</b>       |     |                                                                                                                                                                                                              | 3    |
| Interpretation           | 20  | Give a cautious overall interpretation of results considering objectives, limitations, multiplicity of analyses, results from similar studies, and other relevant evidence                                   |      |
| Generalisability         | 21  | Discuss the generalisability (external validity) of the study results                                                                                                                                        |      |
| <b>Other information</b> |     |                                                                                                                                                                                                              | 7    |
| Funding                  | 22  | Give the source of funding and the role of the funders for the present study and, if applicable, for the original study on which the present article is based                                                | 7    |

\*Give information separately for cases and controls in case-control studies and, if applicable, for exposed and unexposed groups in cohort and cross-sectional studies.

**Note:** An Explanation and Elaboration article discusses each checklist item and gives methodological background and published examples of transparent reporting. The STROBE checklist is best used in conjunction with this article (freely available on the Web sites of PLoS Medicine at <http://www.plosmedicine.org/>, Annals of Internal Medicine at <http://www.annals.org/>, and Epidemiology at <http://www.epidem.com/>). Information on the STROBE Initiative is available at [www.strobe-statement.org](http://www.strobe-statement.org).
